# Supplementary material for: FMTdb: An Integrated Database of Clinical and Microbial Profiles for Fecal Microbiota Transplantation
Source: Research Square preprint supplement (doi:10.21203/rs.3.rs-7881739/v1), 2025-11-23
Supplement: Supplementary file 1 [file 8f1682de55c1afaa0ad93fc5.xlsx]

## Sheet: Sheet1
Group	Sample ID	Age	BMI	SBP	DBP	Height	Weight	Rec ID	Doner ID	Effect	Dor ID	Gender	Test Time	E-HBSAG	E-HBSAB	E-HBEAG	E-HBEAB	E-HBCAB	E-HCV	SG	PH	TP	ALB	GELO	A/G	DBIL	TBIL	ALT	AST	ASTM	ALP	GGTL	BUN1	CREA1	EGFR	UA	TCHO	TG	HDL	LDL	K	NA	CL	WBC	RBC	HGB	HCT	MCV	MCH
Don	Dor1	28	28.7347	119	90	175	88	Rec11	Dor1	Nonresponse	Dor1	Male	2022.06.07	0.001	12.119	0.006	11.583	0.016	0.014	1.01	6.5	74.6	45.5	29.1	1.56	3.9	11	49.1	22.7	11.3	105.2	24.8	4.3	68	123.32	377	4.9	1.15	1.27	3.36	4.13	142	108	6.46	5.16	160	47.6	92.3	31
Don	Dor1	28	28.7347	119	90	175	88	Rec11	Dor1	Nonresponse	Dor1	Male	2022.10.29	0.001	10.732	0.018	12.677	0.014	0.011	1.015	7	75.9	46.9	29	1.62	4.8	13.2	34.7	19.8	9	79.3	23.9	4.4	65	124.7	359	5.01	0.97	1.26	3.3	3.86	141	106	6.79	5.16	160	47.7	92.3	30.9
Don	Dor1	28	28.7347	119	90	175	88	Rec111	Dor1	Response	Dor1	Male	2022.06.07	0.001	12.119	0.006	11.583	0.016	0.014	1.01	6.5	74.6	45.5	29.1	1.56	3.9	11	49.1	22.7	11.3	105.2	24.8	4.3	68	123.32	377	4.9	1.15	1.27	3.36	4.13	142	108	6.46	5.16	160	47.6	92.3	31
Don	Dor1	28	28.7347	119	90	175	88	Rec111	Dor1	Response	Dor1	Male	2022.10.29	0.001	10.732	0.018	12.677	0.014	0.011	1.015	7	75.9	46.9	29	1.62	4.8	13.2	34.7	19.8	9	79.3	23.9	4.4	65	124.7	359	5.01	0.97	1.26	3.3	3.86	141	106	6.79	5.16	160	47.7	92.3	30.9
Don	Dor1	28	28.7347	119	90	175	88	Rec121	Dor1	Response	Dor1	Male	2022.06.07	0.001	12.119	0.006	11.583	0.016	0.014	1.01	6.5	74.6	45.5	29.1	1.56	3.9	11	49.1	22.7	11.3	105.2	24.8	4.3	68	123.32	377	4.9	1.15	1.27	3.36	4.13	142	108	6.46	5.16	160	47.6	92.3	31
Don	Dor1	28	28.7347	119	90	175	88	Rec121	Dor1	Response	Dor1	Male	2022.10.29	0.001	10.732	0.018	12.677	0.014	0.011	1.015	7	75.9	46.9	29	1.62	4.8	13.2	34.7	19.8	9	79.3	23.9	4.4	65	124.7	359	5.01	0.97	1.26	3.3	3.86	141	106	6.79	5.16	160	47.7	92.3	30.9
Don	Dor1	28	28.7347	119	90	175	88	Rec123	Dor1	Response	Dor1	Male	2022.06.07	0.001	12.119	0.006	11.583	0.016	0.014	1.01	6.5	74.6	45.5	29.1	1.56	3.9	11	49.1	22.7	11.3	105.2	24.8	4.3	68	123.32	377	4.9	1.15	1.27	3.36	4.13	142	108	6.46	5.16	160	47.6	92.3	31
Don	Dor1	28	28.7347	119	90	175	88	Rec123	Dor1	Response	Dor1	Male	2022.10.29	0.001	10.732	0.018	12.677	0.014	0.011	1.015	7	75.9	46.9	29	1.62	4.8	13.2	34.7	19.8	9	79.3	23.9	4.4	65	124.7	359	5.01	0.97	1.26	3.3	3.86	141	106	6.79	5.16	160	47.7	92.3	30.9
Don	Dor1	28	28.7347	119	90	175	88	Rec134	Dor1	Response	Dor1	Male	2022.06.07	0.001	12.119	0.006	11.583	0.016	0.014	1.01	6.5	74.6	45.5	29.1	1.56	3.9	11	49.1	22.7	11.3	105.2	24.8	4.3	68	123.32	377	4.9	1.15	1.27	3.36	4.13	142	108	6.46	5.16	160	47.6	92.3	31
Don	Dor1	28	28.7347	119	90	175	88	Rec134	Dor1	Response	Dor1	Male	2022.10.29	0.001	10.732	0.018	12.677	0.014	0.011	1.015	7	75.9	46.9	29	1.62	4.8	13.2	34.7	19.8	9	79.3	23.9	4.4	65	124.7	359	5.01	0.97	1.26	3.3	3.86	141	106	6.79	5.16	160	47.7	92.3	30.9
Don	Dor1	28	28.7347	119	90	175	88	Rec15	Dor1	Nonresponse	Dor1	Male	2022.06.07	0.001	12.119	0.006	11.583	0.016	0.014	1.01	6.5	74.6	45.5	29.1	1.56	3.9	11	49.1	22.7	11.3	105.2	24.8	4.3	68	123.32	377	4.9	1.15	1.27	3.36	4.13	142	108	6.46	5.16	160	47.6	92.3	31
Don	Dor1	28	28.7347	119	90	175	88	Rec15	Dor1	Nonresponse	Dor1	Male	2022.10.29	0.001	10.732	0.018	12.677	0.014	0.011	1.015	7	75.9	46.9	29	1.62	4.8	13.2	34.7	19.8	9	79.3	23.9	4.4	65	124.7	359	5.01	0.97	1.26	3.3	3.86	141	106	6.79	5.16	160	47.7	92.3	30.9
Don	Dor1	28	28.7347	119	90	175	88	Rec167	Dor1	Response	Dor1	Male	2022.06.07	0.001	12.119	0.006	11.583	0.016	0.014	1.01	6.5	74.6	45.5	29.1	1.56	3.9	11	49.1	22.7	11.3	105.2	24.8	4.3	68	123.32	377	4.9	1.15	1.27	3.36	4.13	142	108	6.46	5.16	160	47.6	92.3	31
Don	Dor1	28	28.7347	119	90	175	88	Rec167	Dor1	Response	Dor1	Male	2022.10.29	0.001	10.732	0.018	12.677	0.014	0.011	1.015	7	75.9	46.9	29	1.62	4.8	13.2	34.7	19.8	9	79.3	23.9	4.4	65	124.7	359	5.01	0.97	1.26	3.3	3.86	141	106	6.79	5.16	160	47.7	92.3	30.9
Don	Dor1	28	28.7347	119	90	175	88	Rec170	Dor1	Response	Dor1	Male	2022.06.07	0.001	12.119	0.006	11.583	0.016	0.014	1.01	6.5	74.6	45.5	29.1	1.56	3.9	11	49.1	22.7	11.3	105.2	24.8	4.3	68	123.32	377	4.9	1.15	1.27	3.36	4.13	142	108	6.46	5.16	160	47.6	92.3	31
Don	Dor1	28	28.7347	119	90	175	88	Rec170	Dor1	Response	Dor1	Male	2022.10.29	0.001	10.732	0.018	12.677	0.014	0.011	1.015	7	75.9	46.9	29	1.62	4.8	13.2	34.7	19.8	9	79.3	23.9	4.4	65	124.7	359	5.01	0.97	1.26	3.3	3.86	141	106	6.79	5.16	160	47.7	92.3	30.9
Don	Dor1	28	28.7347	119	90	175	88	Rec171	Dor1	Response	Dor1	Male	2022.06.07	0.001	12.119	0.006	11.583	0.016	0.014	1.01	6.5	74.6	45.5	29.1	1.56	3.9	11	49.1	22.7	11.3	105.2	24.8	4.3	68	123.32	377	4.9	1.15	1.27	3.36	4.13	142	108	6.46	5.16	160	47.6	92.3	31
Don	Dor1	28	28.7347	119	90	175	88	Rec171	Dor1	Response	Dor1	Male	2022.10.29	0.001	10.732	0.018	12.677	0.014	0.011	1.015	7	75.9	46.9	29	1.62	4.8	13.2	34.7	19.8	9	79.3	23.9	4.4	65	124.7	359	5.01	0.97	1.26	3.3	3.86	141	106	6.79	5.16	160	47.7	92.3	30.9
Don	Dor1	28	28.7347	119	90	175	88	Rec172	Dor1	Response	Dor1	Male	2022.06.07	0.001	12.119	0.006	11.583	0.016	0.014	1.01	6.5	74.6	45.5	29.1	1.56	3.9	11	49.1	22.7	11.3	105.2	24.8	4.3	68	123.32	377	4.9	1.15	1.27	3.36	4.13	142	108	6.46	5.16	160	47.6	92.3	31
Don	Dor1	28	28.7347	119	90	175	88	Rec172	Dor1	Response	Dor1	Male	2022.10.29	0.001	10.732	0.018	12.677	0.014	0.011	1.015	7	75.9	46.9	29	1.62	4.8	13.2	34.7	19.8	9	79.3	23.9	4.4	65	124.7	359	5.01	0.97	1.26	3.3	3.86	141	106	6.79	5.16	160	47.7	92.3	30.9
Don	Dor1	28	28.7347	119	90	175	88	Rec173	Dor1	Response	Dor1	Male	2022.06.07	0.001	12.119	0.006	11.583	0.016	0.014	1.01	6.5	74.6	45.5	29.1	1.56	3.9	11	49.1	22.7	11.3	105.2	24.8	4.3	68	123.32	377	4.9	1.15	1.27	3.36	4.13	142	108	6.46	5.16	160	47.6	92.3	31
Don	Dor1	28	28.7347	119	90	175	88	Rec173	Dor1	Response	Dor1	Male	2022.10.29	0.001	10.732	0.018	12.677	0.014	0.011	1.015	7	75.9	46.9	29	1.62	4.8	13.2	34.7	19.8	9	79.3	23.9	4.4	65	124.7	359	5.01	0.97	1.26	3.3	3.86	141	106	6.79	5.16	160	47.7	92.3	30.9
Don	Dor1	28	28.7347	119	90	175	88	Rec181	Dor1	Nonresponse	Dor1	Male	2022.06.07	0.001	12.119	0.006	11.583	0.016	0.014	1.01	6.5	74.6	45.5	29.1	1.56	3.9	11	49.1	22.7	11.3	105.2	24.8	4.3	68	123.32	377	4.9	1.15	1.27	3.36	4.13	142	108	6.46	5.16	160	47.6	92.3	31
Don	Dor1	28	28.7347	119	90	175	88	Rec181	Dor1	Nonresponse	Dor1	Male	2022.10.29	0.001	10.732	0.018	12.677	0.014	0.011	1.015	7	75.9	46.9	29	1.62	4.8	13.2	34.7	19.8	9	79.3	23.9	4.4	65	124.7	359	5.01	0.97	1.26	3.3	3.86	141	106	6.79	5.16	160	47.7	92.3	30.9
Don	Dor1	28	28.7347	119	90	175	88	Rec182	Dor1	Nonresponse	Dor1	Male	2022.06.07	0.001	12.119	0.006	11.583	0.016	0.014	1.01	6.5	74.6	45.5	29.1	1.56	3.9	11	49.1	22.7	11.3	105.2	24.8	4.3	68	123.32	377	4.9	1.15	1.27	3.36	4.13	142	108	6.46	5.16	160	47.6	92.3	31
Don	Dor1	28	28.7347	119	90	175	88	Rec182	Dor1	Nonresponse	Dor1	Male	2022.10.29	0.001	10.732	0.018	12.677	0.014	0.011	1.015	7	75.9	46.9	29	1.62	4.8	13.2	34.7	19.8	9	79.3	23.9	4.4	65	124.7	359	5.01	0.97	1.26	3.3	3.86	141	106	6.79	5.16	160	47.7	92.3	30.9
Don	Dor1	28	28.7347	119	90	175	88	Rec215	Dor1	Response	Dor1	Male	2022.06.07	0.001	12.119	0.006	11.583	0.016	0.014	1.01	6.5	74.6	45.5	29.1	1.56	3.9	11	49.1	22.7	11.3	105.2	24.8	4.3	68	123.32	377	4.9	1.15	1.27	3.36	4.13	142	108	6.46	5.16	160	47.6	92.3	31
Don	Dor1	28	28.7347	119	90	175	88	Rec215	Dor1	Response	Dor1	Male	2022.10.29	0.001	10.732	0.018	12.677	0.014	0.011	1.015	7	75.9	46.9	29	1.62	4.8	13.2	34.7	19.8	9	79.3	23.9	4.4	65	124.7	359	5.01	0.97	1.26	3.3	3.86	141	106	6.79	5.16	160	47.7	92.3	30.9
Don	Dor1	28	28.7347	119	90	175	88	Rec239	Dor1	Response	Dor1	Male	2022.06.07	0.001	12.119	0.006	11.583	0.016	0.014	1.01	6.5	74.6	45.5	29.1	1.56	3.9	11	49.1	22.7	11.3	105.2	24.8	4.3	68	123.32	377	4.9	1.15	1.27	3.36	4.13	142	108	6.46	5.16	160	47.6	92.3	31
Don	Dor1	28	28.7347	119	90	175	88	Rec239	Dor1	Response	Dor1	Male	2022.10.29	0.001	10.732	0.018	12.677	0.014	0.011	1.015	7	75.9	46.9	29	1.62	4.8	13.2	34.7	19.8	9	79.3	23.9	4.4	65	124.7	359	5.01	0.97	1.26	3.3	3.86	141	106	6.79	5.16	160	47.7	92.3	30.9
Don	Dor1	28	28.7347	119	90	175	88	Rec240	Dor1	Response	Dor1	Male	2022.06.07	0.001	12.119	0.006	11.583	0.016	0.014	1.01	6.5	74.6	45.5	29.1	1.56	3.9	11	49.1	22.7	11.3	105.2	24.8	4.3	68	123.32	377	4.9	1.15	1.27	3.36	4.13	142	108	6.46	5.16	160	47.6	92.3	31
Don	Dor1	28	28.7347	119	90	175	88	Rec240	Dor1	Response	Dor1	Male	2022.10.29	0.001	10.732	0.018	12.677	0.014	0.011	1.015	7	75.9	46.9	29	1.62	4.8	13.2	34.7	19.8	9	79.3	23.9	4.4	65	124.7	359	5.01	0.97	1.26	3.3	3.86	141	106	6.79	5.16	160	47.7	92.3	30.9
Don	Dor1	28	28.7347	119	90	175	88	Rec253	Dor1	Response	Dor1	Male	2022.06.07	0.001	12.119	0.006	11.583	0.016	0.014	1.01	6.5	74.6	45.5	29.1	1.56	3.9	11	49.1	22.7	11.3	105.2	24.8	4.3	68	123.32	377	4.9	1.15	1.27	3.36	4.13	142	108	6.46	5.16	160	47.6	92.3	31
Don	Dor1	28	28.7347	119	90	175	88	Rec253	Dor1	Response	Dor1	Male	2022.10.29	0.001	10.732	0.018	12.677	0.014	0.011	1.015	7	75.9	46.9	29	1.62	4.8	13.2	34.7	19.8	9	79.3	23.9	4.4	65	124.7	359	5.01	0.97	1.26	3.3	3.86	141	106	6.79	5.16	160	47.7	92.3	30.9
Don	Dor1	28	28.7347	119	90	175	88	Rec258	Dor1	Nonresponse	Dor1	Male	2022.06.07	0.001	12.119	0.006	11.583	0.016	0.014	1.01	6.5	74.6	45.5	29.1	1.56	3.9	11	49.1	22.7	11.3	105.2	24.8	4.3	68	123.32	377	4.9	1.15	1.27	3.36	4.13	142	108	6.46	5.16	160	47.6	92.3	31
Don	Dor1	28	28.7347	119	90	175	88	Rec258	Dor1	Nonresponse	Dor1	Male	2022.10.29	0.001	10.732	0.018	12.677	0.014	0.011	1.015	7	75.9	46.9	29	1.62	4.8	13.2	34.7	19.8	9	79.3	23.9	4.4	65	124.7	359	5.01	0.97	1.26	3.3	3.86	141	106	6.79	5.16	160	47.7	92.3	30.9
Don	Dor1	28	28.7347	119	90	175	88	Rec263	Dor1	Response	Dor1	Male	2022.06.07	0.001	12.119	0.006	11.583	0.016	0.014	1.01	6.5	74.6	45.5	29.1	1.56	3.9	11	49.1	22.7	11.3	105.2	24.8	4.3	68	123.32	377	4.9	1.15	1.27	3.36	4.13	142	108	6.46	5.16	160	47.6	92.3	31
Don	Dor1	28	28.7347	119	90	175	88	Rec263	Dor1	Response	Dor1	Male	2022.10.29	0.001	10.732	0.018	12.677	0.014	0.011	1.015	7	75.9	46.9	29	1.62	4.8	13.2	34.7	19.8	9	79.3	23.9	4.4	65	124.7	359	5.01	0.97	1.26	3.3	3.86	141	106	6.79	5.16	160	47.7	92.3	30.9
Don	Dor1	28	28.7347	119	90	175	88	Rec273	Dor1	Response	Dor1	Male	2022.06.07	0.001	12.119	0.006	11.583	0.016	0.014	1.01	6.5	74.6	45.5	29.1	1.56	3.9	11	49.1	22.7	11.3	105.2	24.8	4.3	68	123.32	377	4.9	1.15	1.27	3.36	4.13	142	108	6.46	5.16	160	47.6	92.3	31
Don	Dor1	28	28.7347	119	90	175	88	Rec273	Dor1	Response	Dor1	Male	2022.10.29	0.001	10.732	0.018	12.677	0.014	0.011	1.015	7	75.9	46.9	29	1.62	4.8	13.2	34.7	19.8	9	79.3	23.9	4.4	65	124.7	359	5.01	0.97	1.26	3.3	3.86	141	106	6.79	5.16	160	47.7	92.3	30.9
Don	Dor1	28	28.7347	119	90	175	88	Rec283	Dor1	Response	Dor1	Male	2022.06.07	0.001	12.119	0.006	11.583	0.016	0.014	1.01	6.5	74.6	45.5	29.1	1.56	3.9	11	49.1	22.7	11.3	105.2	24.8	4.3	68	123.32	377	4.9	1.15	1.27	3.36	4.13	142	108	6.46	5.16	160	47.6	92.3	31
Don	Dor1	28	28.7347	119	90	175	88	Rec283	Dor1	Response	Dor1	Male	2022.10.29	0.001	10.732	0.018	12.677	0.014	0.011	1.015	7	75.9	46.9	29	1.62	4.8	13.2	34.7	19.8	9	79.3	23.9	4.4	65	124.7	359	5.01	0.97	1.26	3.3	3.86	141	106	6.79	5.16	160	47.7	92.3	30.9
Don	Dor1	28	28.7347	119	90	175	88	Rec297	Dor1	Response	Dor1	Male	2022.06.07	0.001	12.119	0.006	11.583	0.016	0.014	1.01	6.5	74.6	45.5	29.1	1.56	3.9	11	49.1	22.7	11.3	105.2	24.8	4.3	68	123.32	377	4.9	1.15	1.27	3.36	4.13	142	108	6.46	5.16	160	47.6	92.3	31
Don	Dor1	28	28.7347	119	90	175	88	Rec297	Dor1	Response	Dor1	Male	2022.10.29	0.001	10.732	0.018	12.677	0.014	0.011	1.015	7	75.9	46.9	29	1.62	4.8	13.2	34.7	19.8	9	79.3	23.9	4.4	65	124.7	359	5.01	0.97	1.26	3.3	3.86	141	106	6.79	5.16	160	47.7	92.3	30.9
Don	Dor1	28	28.7347	119	90	175	88	Rec301	Dor1	Response	Dor1	Male	2022.06.07	0.001	12.119	0.006	11.583	0.016	0.014	1.01	6.5	74.6	45.5	29.1	1.56	3.9	11	49.1	22.7	11.3	105.2	24.8	4.3	68	123.32	377	4.9	1.15	1.27	3.36	4.13	142	108	6.46	5.16	160	47.6	92.3	31
Don	Dor1	28	28.7347	119	90	175	88	Rec301	Dor1	Response	Dor1	Male	2022.10.29	0.001	10.732	0.018	12.677	0.014	0.011	1.015	7	75.9	46.9	29	1.62	4.8	13.2	34.7	19.8	9	79.3	23.9	4.4	65	124.7	359	5.01	0.97	1.26	3.3	3.86	141	106	6.79	5.16	160	47.7	92.3	30.9
Don	Dor1	28	28.7347	119	90	175	88	Rec311	Dor1	Nonresponse	Dor1	Male	2022.06.07	0.001	12.119	0.006	11.583	0.016	0.014	1.01	6.5	74.6	45.5	29.1	1.56	3.9	11	49.1	22.7	11.3	105.2	24.8	4.3	68	123.32	377	4.9	1.15	1.27	3.36	4.13	142	108	6.46	5.16	160	47.6	92.3	31
Don	Dor1	28	28.7347	119	90	175	88	Rec311	Dor1	Nonresponse	Dor1	Male	2022.10.29	0.001	10.732	0.018	12.677	0.014	0.011	1.015	7	75.9	46.9	29	1.62	4.8	13.2	34.7	19.8	9	79.3	23.9	4.4	65	124.7	359	5.01	0.97	1.26	3.3	3.86	141	106	6.79	5.16	160	47.7	92.3	30.9
Don	Dor1	28	28.7347	119	90	175	88	Rec319	Dor1	Response	Dor1	Male	2022.06.07	0.001	12.119	0.006	11.583	0.016	0.014	1.01	6.5	74.6	45.5	29.1	1.56	3.9	11	49.1	22.7	11.3	105.2	24.8	4.3	68	123.32	377	4.9	1.15	1.27	3.36	4.13	142	108	6.46	5.16	160	47.6	92.3	31
Don	Dor1	28	28.7347	119	90	175	88	Rec319	Dor1	Response	Dor1	Male	2022.10.29	0.001	10.732	0.018	12.677	0.014	0.011	1.015	7	75.9	46.9	29	1.62	4.8	13.2	34.7	19.8	9	79.3	23.9	4.4	65	124.7	359	5.01	0.97	1.26	3.3	3.86	141	106	6.79	5.16	160	47.7	92.3	30.9
Don	Dor1	28	28.7347	119	90	175	88	Rec32	Dor1	Response	Dor1	Male	2022.06.07	0.001	12.119	0.006	11.583	0.016	0.014	1.01	6.5	74.6	45.5	29.1	1.56	3.9	11	49.1	22.7	11.3	105.2	24.8	4.3	68	123.32	377	4.9	1.15	1.27	3.36	4.13	142	108	6.46	5.16	160	47.6	92.3	31
Don	Dor1	28	28.7347	119	90	175	88	Rec32	Dor1	Response	Dor1	Male	2022.10.29	0.001	10.732	0.018	12.677	0.014	0.011	1.015	7	75.9	46.9	29	1.62	4.8	13.2	34.7	19.8	9	79.3	23.9	4.4	65	124.7	359	5.01	0.97	1.26	3.3	3.86	141	106	6.79	5.16	160	47.7	92.3	30.9
Don	Dor1	28	28.7347	119	90	175	88	Rec320	Dor1	Response	Dor1	Male	2022.06.07	0.001	12.119	0.006	11.583	0.016	0.014	1.01	6.5	74.6	45.5	29.1	1.56	3.9	11	49.1	22.7	11.3	105.2	24.8	4.3	68	123.32	377	4.9	1.15	1.27	3.36	4.13	142	108	6.46	5.16	160	47.6	92.3	31
Don	Dor1	28	28.7347	119	90	175	88	Rec320	Dor1	Response	Dor1	Male	2022.10.29	0.001	10.732	0.018	12.677	0.014	0.011	1.015	7	75.9	46.9	29	1.62	4.8	13.2	34.7	19.8	9	79.3	23.9	4.4	65	124.7	359	5.01	0.97	1.26	3.3	3.86	141	106	6.79	5.16	160	47.7	92.3	30.9
Don	Dor1	28	28.7347	119	90	175	88	Rec328	Dor1	Nonresponse	Dor1	Male	2022.06.07	0.001	12.119	0.006	11.583	0.016	0.014	1.01	6.5	74.6	45.5	29.1	1.56	3.9	11	49.1	22.7	11.3	105.2	24.8	4.3	68	123.32	377	4.9	1.15	1.27	3.36	4.13	142	108	6.46	5.16	160	47.6	92.3	31
Don	Dor1	28	28.7347	119	90	175	88	Rec328	Dor1	Nonresponse	Dor1	Male	2022.10.29	0.001	10.732	0.018	12.677	0.014	0.011	1.015	7	75.9	46.9	29	1.62	4.8	13.2	34.7	19.8	9	79.3	23.9	4.4	65	124.7	359	5.01	0.97	1.26	3.3	3.86	141	106	6.79	5.16	160	47.7	92.3	30.9
Don	Dor1	28	28.7347	119	90	175	88	Rec341	Dor1	Response	Dor1	Male	2022.06.07	0.001	12.119	0.006	11.583	0.016	0.014	1.01	6.5	74.6	45.5	29.1	1.56	3.9	11	49.1	22.7	11.3	105.2	24.8	4.3	68	123.32	377	4.9	1.15	1.27	3.36	4.13	142	108	6.46	5.16	160	47.6	92.3	31
Don	Dor1	28	28.7347	119	90	175	88	Rec341	Dor1	Response	Dor1	Male	2022.10.29	0.001	10.732	0.018	12.677	0.014	0.011	1.015	7	75.9	46.9	29	1.62	4.8	13.2	34.7	19.8	9	79.3	23.9	4.4	65	124.7	359	5.01	0.97	1.26	3.3	3.86	141	106	6.79	5.16	160	47.7	92.3	30.9
Don	Dor1	28	28.7347	119	90	175	88	Rec347	Dor1	Response	Dor1	Male	2022.06.07	0.001	12.119	0.006	11.583	0.016	0.014	1.01	6.5	74.6	45.5	29.1	1.56	3.9	11	49.1	22.7	11.3	105.2	24.8	4.3	68	123.32	377	4.9	1.15	1.27	3.36	4.13	142	108	6.46	5.16	160	47.6	92.3	31
Don	Dor1	28	28.7347	119	90	175	88	Rec347	Dor1	Response	Dor1	Male	2022.10.29	0.001	10.732	0.018	12.677	0.014	0.011	1.015	7	75.9	46.9	29	1.62	4.8	13.2	34.7	19.8	9	79.3	23.9	4.4	65	124.7	359	5.01	0.97	1.26	3.3	3.86	141	106	6.79	5.16	160	47.7	92.3	30.9
Don	Dor1	28	28.7347	119	90	175	88	Rec351	Dor1	Response	Dor1	Male	2022.06.07	0.001	12.119	0.006	11.583	0.016	0.014	1.01	6.5	74.6	45.5	29.1	1.56	3.9	11	49.1	22.7	11.3	105.2	24.8	4.3	68	123.32	377	4.9	1.15	1.27	3.36	4.13	142	108	6.46	5.16	160	47.6	92.3	31
Don	Dor1	28	28.7347	119	90	175	88	Rec351	Dor1	Response	Dor1	Male	2022.10.29	0.001	10.732	0.018	12.677	0.014	0.011	1.015	7	75.9	46.9	29	1.62	4.8	13.2	34.7	19.8	9	79.3	23.9	4.4	65	124.7	359	5.01	0.97	1.26	3.3	3.86	141	106	6.79	5.16	160	47.7	92.3	30.9
Don	Dor1	28	28.7347	119	90	175	88	Rec356	Dor1	Response	Dor1	Male	2022.06.07	0.001	12.119	0.006	11.583	0.016	0.014	1.01	6.5	74.6	45.5	29.1	1.56	3.9	11	49.1	22.7	11.3	105.2	24.8	4.3	68	123.32	377	4.9	1.15	1.27	3.36	4.13	142	108	6.46	5.16	160	47.6	92.3	31
Don	Dor1	28	28.7347	119	90	175	88	Rec356	Dor1	Response	Dor1	Male	2022.10.29	0.001	10.732	0.018	12.677	0.014	0.011	1.015	7	75.9	46.9	29	1.62	4.8	13.2	34.7	19.8	9	79.3	23.9	4.4	65	124.7	359	5.01	0.97	1.26	3.3	3.86	141	106	6.79	5.16	160	47.7	92.3	30.9
Don	Dor1	28	28.7347	119	90	175	88	Rec48	Dor1	Response	Dor1	Male	2022.06.07	0.001	12.119	0.006	11.583	0.016	0.014	1.01	6.5	74.6	45.5	29.1	1.56	3.9	11	49.1	22.7	11.3	105.2	24.8	4.3	68	123.32	377	4.9	1.15	1.27	3.36	4.13	142	108	6.46	5.16	160	47.6	92.3	31
Don	Dor1	28	28.7347	119	90	175	88	Rec48	Dor1	Response	Dor1	Male	2022.10.29	0.001	10.732	0.018	12.677	0.014	0.011	1.015	7	75.9	46.9	29	1.62	4.8	13.2	34.7	19.8	9	79.3	23.9	4.4	65	124.7	359	5.01	0.97	1.26	3.3	3.86	141	106	6.79	5.16	160	47.7	92.3	30.9
Don	Dor1	28	28.7347	119	90	175	88	Rec52	Dor1	Response	Dor1	Male	2022.06.07	0.001	12.119	0.006	11.583	0.016	0.014	1.01	6.5	74.6	45.5	29.1	1.56	3.9	11	49.1	22.7	11.3	105.2	24.8	4.3	68	123.32	377	4.9	1.15	1.27	3.36	4.13	142	108	6.46	5.16	160	47.6	92.3	31
Don	Dor1	28	28.7347	119	90	175	88	Rec52	Dor1	Response	Dor1	Male	2022.10.29	0.001	10.732	0.018	12.677	0.014	0.011	1.015	7	75.9	46.9	29	1.62	4.8	13.2	34.7	19.8	9	79.3	23.9	4.4	65	124.7	359	5.01	0.97	1.26	3.3	3.86	141	106	6.79	5.16	160	47.7	92.3	30.9
Don	Dor1	28	28.7347	119	90	175	88	Rec62	Dor1	Nonresponse	Dor1	Male	2022.06.07	0.001	12.119	0.006	11.583	0.016	0.014	1.01	6.5	74.6	45.5	29.1	1.56	3.9	11	49.1	22.7	11.3	105.2	24.8	4.3	68	123.32	377	4.9	1.15	1.27	3.36	4.13	142	108	6.46	5.16	160	47.6	92.3	31
Don	Dor1	28	28.7347	119	90	175	88	Rec62	Dor1	Nonresponse	Dor1	Male	2022.10.29	0.001	10.732	0.018	12.677	0.014	0.011	1.015	7	75.9	46.9	29	1.62	4.8	13.2	34.7	19.8	9	79.3	23.9	4.4	65	124.7	359	5.01	0.97	1.26	3.3	3.86	141	106	6.79	5.16	160	47.7	92.3	30.9
Don	Dor1	28	28.7347	119	90	175	88	Rec68	Dor1	Response	Dor1	Male	2022.06.07	0.001	12.119	0.006	11.583	0.016	0.014	1.01	6.5	74.6	45.5	29.1	1.56	3.9	11	49.1	22.7	11.3	105.2	24.8	4.3	68	123.32	377	4.9	1.15	1.27	3.36	4.13	142	108	6.46	5.16	160	47.6	92.3	31
Don	Dor1	28	28.7347	119	90	175	88	Rec68	Dor1	Response	Dor1	Male	2022.10.29	0.001	10.732	0.018	12.677	0.014	0.011	1.015	7	75.9	46.9	29	1.62	4.8	13.2	34.7	19.8	9	79.3	23.9	4.4	65	124.7	359	5.01	0.97	1.26	3.3	3.86	141	106	6.79	5.16	160	47.7	92.3	30.9
Don	Dor1	28	28.7347	119	90	175	88	Rec93	Dor1	Response	Dor1	Male	2022.06.07	0.001	12.119	0.006	11.583	0.016	0.014	1.01	6.5	74.6	45.5	29.1	1.56	3.9	11	49.1	22.7	11.3	105.2	24.8	4.3	68	123.32	377	4.9	1.15	1.27	3.36	4.13	142	108	6.46	5.16	160	47.6	92.3	31
Don	Dor1	28	28.7347	119	90	175	88	Rec93	Dor1	Response	Dor1	Male	2022.10.29	0.001	10.732	0.018	12.677	0.014	0.011	1.015	7	75.9	46.9	29	1.62	4.8	13.2	34.7	19.8	9	79.3	23.9	4.4	65	124.7	359	5.01	0.97	1.26	3.3	3.86	141	106	6.79	5.16	160	47.7	92.3	30.9
Don	Dor10	28	21.2209	115	86	174	63.5	Rec119	Dor10	Nonresponse	Dor10	Male	2022.06.28	0.001	0.943	0.001	11.714	0.052	0.023	1.025	5	75.6	46.8	28.8	1.63	6.3	17.6	28	22.6	10.3	78.4	19.9	4.2	83	109.41	460	4.45	0.65	1.17	3.18	4.15	142	109	5.04	5.07	156	46.3	91.2	30.2
Don	Dor10	28	21.2209	115	86	174	63.5	Rec119	Dor10	Nonresponse	Dor10	Male	2022.11.01	0.001	0.846	0.007	15.21	0.02	0.02	1.025	5	82.1	51.2	30.9	1.66	7.5	20	17.6	18.1	8.9	73.8	18.2	4.5	84	107.2	362	4.06	0.89	1.23	2.45	4.63	143	105	6.27	5.23	161	48.6	92.8	30.7
Don	Dor10	28	21.2209	115	86	174	63.5	Rec126	Dor10	Nonresponse	Dor10	Male	2022.06.28	0.001	0.943	0.001	11.714	0.052	0.023	1.025	5	75.6	46.8	28.8	1.63	6.3	17.6	28	22.6	10.3	78.4	19.9	4.2	83	109.41	460	4.45	0.65	1.17	3.18	4.15	142	109	5.04	5.07	156	46.3	91.2	30.2
Don	Dor10	28	21.2209	115	86	174	63.5	Rec126	Dor10	Nonresponse	Dor10	Male	2022.11.01	0.001	0.846	0.007	15.21	0.02	0.02	1.025	5	82.1	51.2	30.9	1.66	7.5	20	17.6	18.1	8.9	73.8	18.2	4.5	84	107.2	362	4.06	0.89	1.23	2.45	4.63	143	105	6.27	5.23	161	48.6	92.8	30.7
Don	Dor10	28	21.2209	115	86	174	63.5	Rec146	Dor10	Response	Dor10	Male	2022.06.28	0.001	0.943	0.001	11.714	0.052	0.023	1.025	5	75.6	46.8	28.8	1.63	6.3	17.6	28	22.6	10.3	78.4	19.9	4.2	83	109.41	460	4.45	0.65	1.17	3.18	4.15	142	109	5.04	5.07	156	46.3	91.2	30.2
Don	Dor10	28	21.2209	115	86	174	63.5	Rec146	Dor10	Response	Dor10	Male	2022.11.01	0.001	0.846	0.007	15.21	0.02	0.02	1.025	5	82.1	51.2	30.9	1.66	7.5	20	17.6	18.1	8.9	73.8	18.2	4.5	84	107.2	362	4.06	0.89	1.23	2.45	4.63	143	105	6.27	5.23	161	48.6	92.8	30.7
Don	Dor10	28	21.2209	115	86	174	63.5	Rec154	Dor10	Response	Dor10	Male	2022.06.28	0.001	0.943	0.001	11.714	0.052	0.023	1.025	5	75.6	46.8	28.8	1.63	6.3	17.6	28	22.6	10.3	78.4	19.9	4.2	83	109.41	460	4.45	0.65	1.17	3.18	4.15	142	109	5.04	5.07	156	46.3	91.2	30.2
Don	Dor10	28	21.2209	115	86	174	63.5	Rec154	Dor10	Response	Dor10	Male	2022.11.01	0.001	0.846	0.007	15.21	0.02	0.02	1.025	5	82.1	51.2	30.9	1.66	7.5	20	17.6	18.1	8.9	73.8	18.2	4.5	84	107.2	362	4.06	0.89	1.23	2.45	4.63	143	105	6.27	5.23	161	48.6	92.8	30.7
Don	Dor10	28	21.2209	115	86	174	63.5	Rec158	Dor10	Response	Dor10	Male	2022.06.28	0.001	0.943	0.001	11.714	0.052	0.023	1.025	5	75.6	46.8	28.8	1.63	6.3	17.6	28	22.6	10.3	78.4	19.9	4.2	83	109.41	460	4.45	0.65	1.17	3.18	4.15	142	109	5.04	5.07	156	46.3	91.2	30.2
Don	Dor10	28	21.2209	115	86	174	63.5	Rec158	Dor10	Response	Dor10	Male	2022.11.01	0.001	0.846	0.007	15.21	0.02	0.02	1.025	5	82.1	51.2	30.9	1.66	7.5	20	17.6	18.1	8.9	73.8	18.2	4.5	84	107.2	362	4.06	0.89	1.23	2.45	4.63	143	105	6.27	5.23	161	48.6	92.8	30.7
Don	Dor10	28	21.2209	115	86	174	63.5	Rec183	Dor10	Response	Dor10	Male	2022.06.28	0.001	0.943	0.001	11.714	0.052	0.023	1.025	5	75.6	46.8	28.8	1.63	6.3	17.6	28	22.6	10.3	78.4	19.9	4.2	83	109.41	460	4.45	0.65	1.17	3.18	4.15	142	109	5.04	5.07	156	46.3	91.2	30.2
Don	Dor10	28	21.2209	115	86	174	63.5	Rec183	Dor10	Response	Dor10	Male	2022.11.01	0.001	0.846	0.007	15.21	0.02	0.02	1.025	5	82.1	51.2	30.9	1.66	7.5	20	17.6	18.1	8.9	73.8	18.2	4.5	84	107.2	362	4.06	0.89	1.23	2.45	4.63	143	105	6.27	5.23	161	48.6	92.8	30.7
Don	Dor10	28	21.2209	115	86	174	63.5	Rec207	Dor10	Response	Dor10	Male	2022.06.28	0.001	0.943	0.001	11.714	0.052	0.023	1.025	5	75.6	46.8	28.8	1.63	6.3	17.6	28	22.6	10.3	78.4	19.9	4.2	83	109.41	460	4.45	0.65	1.17	3.18	4.15	142	109	5.04	5.07	156	46.3	91.2	30.2
Don	Dor10	28	21.2209	115	86	174	63.5	Rec207	Dor10	Response	Dor10	Male	2022.11.01	0.001	0.846	0.007	15.21	0.02	0.02	1.025	5	82.1	51.2	30.9	1.66	7.5	20	17.6	18.1	8.9	73.8	18.2	4.5	84	107.2	362	4.06	0.89	1.23	2.45	4.63	143	105	6.27	5.23	161	48.6	92.8	30.7
Don	Dor10	28	21.2209	115	86	174	63.5	Rec233	Dor10	Nonresponse	Dor10	Male	2022.06.28	0.001	0.943	0.001	11.714	0.052	0.023	1.025	5	75.6	46.8	28.8	1.63	6.3	17.6	28	22.6	10.3	78.4	19.9	4.2	83	109.41	460	4.45	0.65	1.17	3.18	4.15	142	109	5.04	5.07	156	46.3	91.2	30.2
Don	Dor10	28	21.2209	115	86	174	63.5	Rec233	Dor10	Nonresponse	Dor10	Male	2022.11.01	0.001	0.846	0.007	15.21	0.02	0.02	1.025	5	82.1	51.2	30.9	1.66	7.5	20	17.6	18.1	8.9	73.8	18.2	4.5	84	107.2	362	4.06	0.89	1.23	2.45	4.63	143	105	6.27	5.23	161	48.6	92.8	30.7
Don	Dor10	28	21.2209	115	86	174	63.5	Rec260	Dor10	Nonresponse	Dor10	Male	2022.06.28	0.001	0.943	0.001	11.714	0.052	0.023	1.025	5	75.6	46.8	28.8	1.63	6.3	17.6	28	22.6	10.3	78.4	19.9	4.2	83	109.41	460	4.45	0.65	1.17	3.18	4.15	142	109	5.04	5.07	156	46.3	91.2	30.2
Don	Dor10	28	21.2209	115	86	174	63.5	Rec260	Dor10	Nonresponse	Dor10	Male	2022.11.01	0.001	0.846	0.007	15.21	0.02	0.02	1.025	5	82.1	51.2	30.9	1.66	7.5	20	17.6	18.1	8.9	73.8	18.2	4.5	84	107.2	362	4.06	0.89	1.23	2.45	4.63	143	105	6.27	5.23	161	48.6	92.8	30.7
Don	Dor10	28	21.2209	115	86	174	63.5	Rec293	Dor10	Response	Dor10	Male	2022.06.28	0.001	0.943	0.001	11.714	0.052	0.023	1.025	5	75.6	46.8	28.8	1.63	6.3	17.6	28	22.6	10.3	78.4	19.9	4.2	83	109.41	460	4.45	0.65	1.17	3.18	4.15	142	109	5.04	5.07	156	46.3	91.2	30.2
Don	Dor10	28	21.2209	115	86	174	63.5	Rec293	Dor10	Response	Dor10	Male	2022.11.01	0.001	0.846	0.007	15.21	0.02	0.02	1.025	5	82.1	51.2	30.9	1.66	7.5	20	17.6	18.1	8.9	73.8	18.2	4.5	84	107.2	362	4.06	0.89	1.23	2.45	4.63	143	105	6.27	5.23	161	48.6	92.8	30.7
Don	Dor10	28	21.2209	115	86	174	63.5	Rec294	Dor10	Response	Dor10	Male	2022.06.28	0.001	0.943	0.001	11.714	0.052	0.023	1.025	5	75.6	46.8	28.8	1.63	6.3	17.6	28	22.6	10.3	78.4	19.9	4.2	83	109.41	460	4.45	0.65	1.17	3.18	4.15	142	109	5.04	5.07	156	46.3	91.2	30.2
Don	Dor10	28	21.2209	115	86	174	63.5	Rec294	Dor10	Response	Dor10	Male	2022.11.01	0.001	0.846	0.007	15.21	0.02	0.02	1.025	5	82.1	51.2	30.9	1.66	7.5	20	17.6	18.1	8.9	73.8	18.2	4.5	84	107.2	362	4.06	0.89	1.23	2.45	4.63	143	105	6.27	5.23	161	48.6	92.8	30.7
Don	Dor10	28	21.2209	115	86	174	63.5	Rec318	Dor10	Nonresponse	Dor10	Male	2022.06.28	0.001	0.943	0.001	11.714	0.052	0.023	1.025	5	75.6	46.8	28.8	1.63	6.3	17.6	28	22.6	10.3	78.4	19.9	4.2	83	109.41	460	4.45	0.65	1.17	3.18	4.15	142	109	5.04	5.07	156	46.3	91.2	30.2
Don	Dor10	28	21.2209	115	86	174	63.5	Rec318	Dor10	Nonresponse	Dor10	Male	2022.11.01	0.001	0.846	0.007	15.21	0.02	0.02	1.025	5	82.1	51.2	30.9	1.66	7.5	20	17.6	18.1	8.9	73.8	18.2	4.5	84	107.2	362	4.06	0.89	1.23	2.45	4.63	143	105	6.27	5.23	161	48.6	92.8	30.7
Don	Dor10	28	21.2209	115	86	174	63.5	Rec325	Dor10	Nonresponse	Dor10	Male	2022.06.28	0.001	0.943	0.001	11.714	0.052	0.023	1.025	5	75.6	46.8	28.8	1.63	6.3	17.6	28	22.6	10.3	78.4	19.9	4.2	83	109.41	460	4.45	0.65	1.17	3.18	4.15	142	109	5.04	5.07	156	46.3	91.2	30.2
Don	Dor10	28	21.2209	115	86	174	63.5	Rec325	Dor10	Nonresponse	Dor10	Male	2022.11.01	0.001	0.846	0.007	15.21	0.02	0.02	1.025	5	82.1	51.2	30.9	1.66	7.5	20	17.6	18.1	8.9	73.8	18.2	4.5	84	107.2	362	4.06	0.89	1.23	2.45	4.63	143	105	6.27	5.23	161	48.6	92.8	30.7
Don	Dor10	28	21.2209	115	86	174	63.5	Rec334	Dor10	Response	Dor10	Male	2022.06.28	0.001	0.943	0.001	11.714	0.052	0.023	1.025	5	75.6	46.8	28.8	1.63	6.3	17.6	28	22.6	10.3	78.4	19.9	4.2	83	109.41	460	4.45	0.65	1.17	3.18	4.15	142	109	5.04	5.07	156	46.3	91.2	30.2
Don	Dor10	28	21.2209	115	86	174	63.5	Rec334	Dor10	Response	Dor10	Male	2022.11.01	0.001	0.846	0.007	15.21	0.02	0.02	1.025	5	82.1	51.2	30.9	1.66	7.5	20	17.6	18.1	8.9	73.8	18.2	4.5	84	107.2	362	4.06	0.89	1.23	2.45	4.63	143	105	6.27	5.23	161	48.6	92.8	30.7
Don	Dor10	28	21.2209	115	86	174	63.5	Rec337	Dor10	Response	Dor10	Male	2022.06.28	0.001	0.943	0.001	11.714	0.052	0.023	1.025	5	75.6	46.8	28.8	1.63	6.3	17.6	28	22.6	10.3	78.4	19.9	4.2	83	109.41	460	4.45	0.65	1.17	3.18	4.15	142	109	5.04	5.07	156	46.3	91.2	30.2
Don	Dor10	28	21.2209	115	86	174	63.5	Rec337	Dor10	Response	Dor10	Male	2022.11.01	0.001	0.846	0.007	15.21	0.02	0.02	1.025	5	82.1	51.2	30.9	1.66	7.5	20	17.6	18.1	8.9	73.8	18.2	4.5	84	107.2	362	4.06	0.89	1.23	2.45	4.63	143	105	6.27	5.23	161	48.6	92.8	30.7
Don	Dor10	28	21.2209	115	86	174	63.5	Rec348	Dor10	Response	Dor10	Male	2022.06.28	0.001	0.943	0.001	11.714	0.052	0.023	1.025	5	75.6	46.8	28.8	1.63	6.3	17.6	28	22.6	10.3	78.4	19.9	4.2	83	109.41	460	4.45	0.65	1.17	3.18	4.15	142	109	5.04	5.07	156	46.3	91.2	30.2
Don	Dor10	28	21.2209	115	86	174	63.5	Rec348	Dor10	Response	Dor10	Male	2022.11.01	0.001	0.846	0.007	15.21	0.02	0.02	1.025	5	82.1	51.2	30.9	1.66	7.5	20	17.6	18.1	8.9	73.8	18.2	4.5	84	107.2	362	4.06	0.89	1.23	2.45	4.63	143	105	6.27	5.23	161	48.6	92.8	30.7
Don	Dor10	28	21.2209	115	86	174	63.5	Rec37	Dor10	Response	Dor10	Male	2022.06.28	0.001	0.943	0.001	11.714	0.052	0.023	1.025	5	75.6	46.8	28.8	1.63	6.3	17.6	28	22.6	10.3	78.4	19.9	4.2	83	109.41	460	4.45	0.65	1.17	3.18	4.15	142	109	5.04	5.07	156	46.3	91.2	30.2
Don	Dor10	28	21.2209	115	86	174	63.5	Rec37	Dor10	Response	Dor10	Male	2022.11.01	0.001	0.846	0.007	15.21	0.02	0.02	1.025	5	82.1	51.2	30.9	1.66	7.5	20	17.6	18.1	8.9	73.8	18.2	4.5	84	107.2	362	4.06	0.89	1.23	2.45	4.63	143	105	6.27	5.23	161	48.6	92.8	30.7
Don	Dor10	28	21.2209	115	86	174	63.5	Rec41	Dor10	Response	Dor10	Male	2022.06.28	0.001	0.943	0.001	11.714	0.052	0.023	1.025	5	75.6	46.8	28.8	1.63	6.3	17.6	28	22.6	10.3	78.4	19.9	4.2	83	109.41	460	4.45	0.65	1.17	3.18	4.15	142	109	5.04	5.07	156	46.3	91.2	30.2
Don	Dor10	28	21.2209	115	86	174	63.5	Rec41	Dor10	Response	Dor10	Male	2022.11.01	0.001	0.846	0.007	15.21	0.02	0.02	1.025	5	82.1	51.2	30.9	1.66	7.5	20	17.6	18.1	8.9	73.8	18.2	4.5	84	107.2	362	4.06	0.89	1.23	2.45	4.63	143	105	6.27	5.23	161	48.6	92.8	30.7
Don	Dor10	28	21.2209	115	86	174	63.5	Rec47	Dor10	Response	Dor10	Male	2022.06.28	0.001	0.943	0.001	11.714	0.052	0.023	1.025	5	75.6	46.8	28.8	1.63	6.3	17.6	28	22.6	10.3	78.4	19.9	4.2	83	109.41	460	4.45	0.65	1.17	3.18	4.15	142	109	5.04	5.07	156	46.3	91.2	30.2
Don	Dor10	28	21.2209	115	86	174	63.5	Rec47	Dor10	Response	Dor10	Male	2022.11.01	0.001	0.846	0.007	15.21	0.02	0.02	1.025	5	82.1	51.2	30.9	1.66	7.5	20	17.6	18.1	8.9	73.8	18.2	4.5	84	107.2	362	4.06	0.89	1.23	2.45	4.63	143	105	6.27	5.23	161	48.6	92.8	30.7
Don	Dor11	29	20.9572	118	82	162	55	Rec102	Dor11	Response	Dor11	Female	2022.06.07	0.001	572.626	0.028	10.144	0.106	0.01	1.02	5	73.2	43.6	29.6	1.47	6.7	19.3	9.1	12.7	6.9	69.9	13.1	6.7	61	117.76	350	4.22	0.82	1.12	2.88	3.94	142	112	5.28	4.67	143	41.7	89.2	30.5
Don	Dor11	29	20.9572	118	82	162	55	Rec116	Dor11	Response	Dor11	Female	2022.06.07	0.001	572.626	0.028	10.144	0.106	0.01	1.02	5	73.2	43.6	29.6	1.47	6.7	19.3	9.1	12.7	6.9	69.9	13.1	6.7	61	117.76	350	4.22	0.82	1.12	2.88	3.94	142	112	5.28	4.67	143	41.7	89.2	30.5
Don	Dor11	29	20.9572	118	82	162	55	Rec122	Dor11	Response	Dor11	Female	2022.06.07	0.001	572.626	0.028	10.144	0.106	0.01	1.02	5	73.2	43.6	29.6	1.47	6.7	19.3	9.1	12.7	6.9	69.9	13.1	6.7	61	117.76	350	4.22	0.82	1.12	2.88	3.94	142	112	5.28	4.67	143	41.7	89.2	30.5
Don	Dor11	29	20.9572	118	82	162	55	Rec132	Dor11	Nonresponse	Dor11	Female	2022.06.07	0.001	572.626	0.028	10.144	0.106	0.01	1.02	5	73.2	43.6	29.6	1.47	6.7	19.3	9.1	12.7	6.9	69.9	13.1	6.7	61	117.76	350	4.22	0.82	1.12	2.88	3.94	142	112	5.28	4.67	143	41.7	89.2	30.5
Don	Dor11	29	20.9572	118	82	162	55	Rec133	Dor11	Response	Dor11	Female	2022.06.07	0.001	572.626	0.028	10.144	0.106	0.01	1.02	5	73.2	43.6	29.6	1.47	6.7	19.3	9.1	12.7	6.9	69.9	13.1	6.7	61	117.76	350	4.22	0.82	1.12	2.88	3.94	142	112	5.28	4.67	143	41.7	89.2	30.5
Don	Dor11	29	20.9572	118	82	162	55	Rec144	Dor11	Response	Dor11	Female	2022.06.07	0.001	572.626	0.028	10.144	0.106	0.01	1.02	5	73.2	43.6	29.6	1.47	6.7	19.3	9.1	12.7	6.9	69.9	13.1	6.7	61	117.76	350	4.22	0.82	1.12	2.88	3.94	142	112	5.28	4.67	143	41.7	89.2	30.5
Don	Dor11	29	20.9572	118	82	162	55	Rec155	Dor11	Response	Dor11	Female	2022.06.07	0.001	572.626	0.028	10.144	0.106	0.01	1.02	5	73.2	43.6	29.6	1.47	6.7	19.3	9.1	12.7	6.9	69.9	13.1	6.7	61	117.76	350	4.22	0.82	1.12	2.88	3.94	142	112	5.28	4.67	143	41.7	89.2	30.5
Don	Dor11	29	20.9572	118	82	162	55	Rec156	Dor11	Response	Dor11	Female	2022.06.07	0.001	572.626	0.028	10.144	0.106	0.01	1.02	5	73.2	43.6	29.6	1.47	6.7	19.3	9.1	12.7	6.9	69.9	13.1	6.7	61	117.76	350	4.22	0.82	1.12	2.88	3.94	142	112	5.28	4.67	143	41.7	89.2	30.5
Don	Dor11	29	20.9572	118	82	162	55	Rec160	Dor11	Nonresponse	Dor11	Female	2022.06.07	0.001	572.626	0.028	10.144	0.106	0.01	1.02	5	73.2	43.6	29.6	1.47	6.7	19.3	9.1	12.7	6.9	69.9	13.1	6.7	61	117.76	350	4.22	0.82	1.12	2.88	3.94	142	112	5.28	4.67	143	41.7	89.2	30.5
Don	Dor11	29	20.9572	118	82	162	55	Rec190	Dor11	Response	Dor11	Female	2022.06.07	0.001	572.626	0.028	10.144	0.106	0.01	1.02	5	73.2	43.6	29.6	1.47	6.7	19.3	9.1	12.7	6.9	69.9	13.1	6.7	61	117.76	350	4.22	0.82	1.12	2.88	3.94	142	112	5.28	4.67	143	41.7	89.2	30.5
Don	Dor11	29	20.9572	118	82	162	55	Rec210	Dor11	Response	Dor11	Female	2022.06.07	0.001	572.626	0.028	10.144	0.106	0.01	1.02	5	73.2	43.6	29.6	1.47	6.7	19.3	9.1	12.7	6.9	69.9	13.1	6.7	61	117.76	350	4.22	0.82	1.12	2.88	3.94	142	112	5.28	4.67	143	41.7	89.2	30.5
Don	Dor11	29	20.9572	118	82	162	55	Rec220	Dor11	Response	Dor11	Female	2022.06.07	0.001	572.626	0.028	10.144	0.106	0.01	1.02	5	73.2	43.6	29.6	1.47	6.7	19.3	9.1	12.7	6.9	69.9	13.1	6.7	61	117.76	350	4.22	0.82	1.12	2.88	3.94	142	112	5.28	4.67	143	41.7	89.2	30.5
Don	Dor11	29	20.9572	118	82	162	55	Rec222	Dor11	Nonresponse	Dor11	Female	2022.06.07	0.001	572.626	0.028	10.144	0.106	0.01	1.02	5	73.2	43.6	29.6	1.47	6.7	19.3	9.1	12.7	6.9	69.9	13.1	6.7	61	117.76	350	4.22	0.82	1.12	2.88	3.94	142	112	5.28	4.67	143	41.7	89.2	30.5
Don	Dor11	29	20.9572	118	82	162	55	Rec227	Dor11	Response	Dor11	Female	2022.06.07	0.001	572.626	0.028	10.144	0.106	0.01	1.02	5	73.2	43.6	29.6	1.47	6.7	19.3	9.1	12.7	6.9	69.9	13.1	6.7	61	117.76	350	4.22	0.82	1.12	2.88	3.94	142	112	5.28	4.67	143	41.7	89.2	30.5
Don	Dor11	29	20.9572	118	82	162	55	Rec234	Dor11	Response	Dor11	Female	2022.06.07	0.001	572.626	0.028	10.144	0.106	0.01	1.02	5	73.2	43.6	29.6	1.47	6.7	19.3	9.1	12.7	6.9	69.9	13.1	6.7	61	117.76	350	4.22	0.82	1.12	2.88	3.94	142	112	5.28	4.67	143	41.7	89.2	30.5
Don	Dor11	29	20.9572	118	82	162	55	Rec24	Dor11	Nonresponse	Dor11	Female	2022.06.07	0.001	572.626	0.028	10.144	0.106	0.01	1.02	5	73.2	43.6	29.6	1.47	6.7	19.3	9.1	12.7	6.9	69.9	13.1	6.7	61	117.76	350	4.22	0.82	1.12	2.88	3.94	142	112	5.28	4.67	143	41.7	89.2	30.5
Don	Dor11	29	20.9572	118	82	162	55	Rec248	Dor11	Response	Dor11	Female	2022.06.07	0.001	572.626	0.028	10.144	0.106	0.01	1.02	5	73.2	43.6	29.6	1.47	6.7	19.3	9.1	12.7	6.9	69.9	13.1	6.7	61	117.76	350	4.22	0.82	1.12	2.88	3.94	142	112	5.28	4.67	143	41.7	89.2	30.5
Don	Dor11	29	20.9572	118	82	162	55	Rec262	Dor11	Response	Dor11	Female	2022.06.07	0.001	572.626	0.028	10.144	0.106	0.01	1.02	5	73.2	43.6	29.6	1.47	6.7	19.3	9.1	12.7	6.9	69.9	13.1	6.7	61	117.76	350	4.22	0.82	1.12	2.88	3.94	142	112	5.28	4.67	143	41.7	89.2	30.5
Don	Dor11	29	20.9572	118	82	162	55	Rec267	Dor11	Response	Dor11	Female	2022.06.07	0.001	572.626	0.028	10.144	0.106	0.01	1.02	5	73.2	43.6	29.6	1.47	6.7	19.3	9.1	12.7	6.9	69.9	13.1	6.7	61	117.76	350	4.22	0.82	1.12	2.88	3.94	142	112	5.28	4.67	143	41.7	89.2	30.5
Don	Dor11	29	20.9572	118	82	162	55	Rec284	Dor11	Response	Dor11	Female	2022.06.07	0.001	572.626	0.028	10.144	0.106	0.01	1.02	5	73.2	43.6	29.6	1.47	6.7	19.3	9.1	12.7	6.9	69.9	13.1	6.7	61	117.76	350	4.22	0.82	1.12	2.88	3.94	142	112	5.28	4.67	143	41.7	89.2	30.5
Don	Dor11	29	20.9572	118	82	162	55	Rec285	Dor11	Response	Dor11	Female	2022.06.07	0.001	572.626	0.028	10.144	0.106	0.01	1.02	5	73.2	43.6	29.6	1.47	6.7	19.3	9.1	12.7	6.9	69.9	13.1	6.7	61	117.76	350	4.22	0.82	1.12	2.88	3.94	142	112	5.28	4.67	143	41.7	89.2	30.5
Don	Dor11	29	20.9572	118	82	162	55	Rec3	Dor11	Nonresponse	Dor11	Female	2022.06.07	0.001	572.626	0.028	10.144	0.106	0.01	1.02	5	73.2	43.6	29.6	1.47	6.7	19.3	9.1	12.7	6.9	69.9	13.1	6.7	61	117.76	350	4.22	0.82	1.12	2.88	3.94	142	112	5.28	4.67	143	41.7	89.2	30.5
Don	Dor11	29	20.9572	118	82	162	55	Rec303	Dor11	Response	Dor11	Female	2022.06.07	0.001	572.626	0.028	10.144	0.106	0.01	1.02	5	73.2	43.6	29.6	1.47	6.7	19.3	9.1	12.7	6.9	69.9	13.1	6.7	61	117.76	350	4.22	0.82	1.12	2.88	3.94	142	112	5.28	4.67	143	41.7	89.2	30.5
Don	Dor11	29	20.9572	118	82	162	55	Rec307	Dor11	Response	Dor11	Female	2022.06.07	0.001	572.626	0.028	10.144	0.106	0.01	1.02	5	73.2	43.6	29.6	1.47	6.7	19.3	9.1	12.7	6.9	69.9	13.1	6.7	61	117.76	350	4.22	0.82	1.12	2.88	3.94	142	112	5.28	4.67	143	41.7	89.2	30.5
Don	Dor11	29	20.9572	118	82	162	55	Rec314	Dor11	Nonresponse	Dor11	Female	2022.06.07	0.001	572.626	0.028	10.144	0.106	0.01	1.02	5	73.2	43.6	29.6	1.47	6.7	19.3	9.1	12.7	6.9	69.9	13.1	6.7	61	117.76	350	4.22	0.82	1.12	2.88	3.94	142	112	5.28	4.67	143	41.7	89.2	30.5
Don	Dor11	29	20.9572	118	82	162	55	Rec326	Dor11	Response	Dor11	Female	2022.06.07	0.001	572.626	0.028	10.144	0.106	0.01	1.02	5	73.2	43.6	29.6	1.47	6.7	19.3	9.1	12.7	6.9	69.9	13.1	6.7	61	117.76	350	4.22	0.82	1.12	2.88	3.94	142	112	5.28	4.67	143	41.7	89.2	30.5
Don	Dor11	29	20.9572	118	82	162	55	Rec363	Dor11	Response	Dor11	Female	2022.06.07	0.001	572.626	0.028	10.144	0.106	0.01	1.02	5	73.2	43.6	29.6	1.47	6.7	19.3	9.1	12.7	6.9	69.9	13.1	6.7	61	117.76	350	4.22	0.82	1.12	2.88	3.94	142	112	5.28	4.67	143	41.7	89.2	30.5
Don	Dor11	29	20.9572	118	82	162	55	Rec38	Dor11	Response	Dor11	Female	2022.06.07	0.001	572.626	0.028	10.144	0.106	0.01	1.02	5	73.2	43.6	29.6	1.47	6.7	19.3	9.1	12.7	6.9	69.9	13.1	6.7	61	117.76	350	4.22	0.82	1.12	2.88	3.94	142	112	5.28	4.67	143	41.7	89.2	30.5
Don	Dor11	29	20.9572	118	82	162	55	Rec44	Dor11	Response	Dor11	Female	2022.06.07	0.001	572.626	0.028	10.144	0.106	0.01	1.02	5	73.2	43.6	29.6	1.47	6.7	19.3	9.1	12.7	6.9	69.9	13.1	6.7	61	117.76	350	4.22	0.82	1.12	2.88	3.94	142	112	5.28	4.67	143	41.7	89.2	30.5
Don	Dor11	29	20.9572	118	82	162	55	Rec5	Dor11	Response	Dor11	Female	2022.06.07	0.001	572.626	0.028	10.144	0.106	0.01	1.02	5	73.2	43.6	29.6	1.47	6.7	19.3	9.1	12.7	6.9	69.9	13.1	6.7	61	117.76	350	4.22	0.82	1.12	2.88	3.94	142	112	5.28	4.67	143	41.7	89.2	30.5
Don	Dor11	29	20.9572	118	82	162	55	Rec56	Dor11	Response	Dor11	Female	2022.06.07	0.001	572.626	0.028	10.144	0.106	0.01	1.02	5	73.2	43.6	29.6	1.47	6.7	19.3	9.1	12.7	6.9	69.9	13.1	6.7	61	117.76	350	4.22	0.82	1.12	2.88	3.94	142	112	5.28	4.67	143	41.7	89.2	30.5
Don	Dor11	29	20.9572	118	82	162	55	Rec58	Dor11	Response	Dor11	Female	2022.06.07	0.001	572.626	0.028	10.144	0.106	0.01	1.02	5	73.2	43.6	29.6	1.47	6.7	19.3	9.1	12.7	6.9	69.9	13.1	6.7	61	117.76	350	4.22	0.82	1.12	2.88	3.94	142	112	5.28	4.67	143	41.7	89.2	30.5
Don	Dor11	29	20.9572	118	82	162	55	Rec78	Dor11	Response	Dor11	Female	2022.06.07	0.001	572.626	0.028	10.144	0.106	0.01	1.02	5	73.2	43.6	29.6	1.47	6.7	19.3	9.1	12.7	6.9	69.9	13.1	6.7	61	117.76	350	4.22	0.82	1.12	2.88	3.94	142	112	5.28	4.67	143	41.7	89.2	30.5
Don	Dor11	29	20.9572	118	82	162	55	Rec91	Dor11	Response	Dor11	Female	2022.06.07	0.001	572.626	0.028	10.144	0.106	0.01	1.02	5	73.2	43.6	29.6	1.47	6.7	19.3	9.1	12.7	6.9	69.9	13.1	6.7	61	117.76	350	4.22	0.82	1.12	2.88	3.94	142	112	5.28	4.67	143	41.7	89.2	30.5
Don	Dor11	29	20.9572	118	82	162	55	Rec97	Dor11	Response	Dor11	Female	2022.06.07	0.001	572.626	0.028	10.144	0.106	0.01	1.02	5	73.2	43.6	29.6	1.47	6.7	19.3	9.1	12.7	6.9	69.9	13.1	6.7	61	117.76	350	4.22	0.82	1.12	2.88	3.94	142	112	5.28	4.67	143	41.7	89.2	30.5
Don	Dor12	25	21.6041	116	87	161	56	Rec131	Dor12	Response	Dor12	Female	2022.07.04	0.001	59.479	0.002	8.357	0.111	0.013	1.025	5	69.5	42.8	26.7	1.6	5.3	16.1	12.9	17.5	7.9	43.1	11.1	4.1	75	96.53	287	4.59	0.71	1.39	2.9	4.75	142	108	5	4.77	143	42.9	89.9	29.9
Don	Dor12	25	21.6041	116	87	161	56	Rec131	Dor12	Response	Dor12	Female	2022.10.29	0.001	63.881	0.019	13.247	0.118	0.009	1.02	6	75.7	45.5	30.2	1.51	5.9	15.1	10.9	19.3	8.6	42.6	11.8	4.9	71	102.1	267	4.88	0.58	1.75	2.59	4.23	141	107	3.81	4.94	147	44.4	89.9	29.9
Don	Dor12	25	21.6041	116	87	161	56	Rec145	Dor12	Response	Dor12	Female	2022.07.04	0.001	59.479	0.002	8.357	0.111	0.013	1.025	5	69.5	42.8	26.7	1.6	5.3	16.1	12.9	17.5	7.9	43.1	11.1	4.1	75	96.53	287	4.59	0.71	1.39	2.9	4.75	142	108	5	4.77	143	42.9	89.9	29.9
Don	Dor12	25	21.6041	116	87	161	56	Rec145	Dor12	Response	Dor12	Female	2022.10.29	0.001	63.881	0.019	13.247	0.118	0.009	1.02	6	75.7	45.5	30.2	1.51	5.9	15.1	10.9	19.3	8.6	42.6	11.8	4.9	71	102.1	267	4.88	0.58	1.75	2.59	4.23	141	107	3.81	4.94	147	44.4	89.9	29.9
Don	Dor12	25	21.6041	116	87	161	56	Rec169	Dor12	Response	Dor12	Female	2022.07.04	0.001	59.479	0.002	8.357	0.111	0.013	1.025	5	69.5	42.8	26.7	1.6	5.3	16.1	12.9	17.5	7.9	43.1	11.1	4.1	75	96.53	287	4.59	0.71	1.39	2.9	4.75	142	108	5	4.77	143	42.9	89.9	29.9
Don	Dor12	25	21.6041	116	87	161	56	Rec169	Dor12	Response	Dor12	Female	2022.10.29	0.001	63.881	0.019	13.247	0.118	0.009	1.02	6	75.7	45.5	30.2	1.51	5.9	15.1	10.9	19.3	8.6	42.6	11.8	4.9	71	102.1	267	4.88	0.58	1.75	2.59	4.23	141	107	3.81	4.94	147	44.4	89.9	29.9
Don	Dor12	25	21.6041	116	87	161	56	Rec188	Dor12	Response	Dor12	Female	2022.07.04	0.001	59.479	0.002	8.357	0.111	0.013	1.025	5	69.5	42.8	26.7	1.6	5.3	16.1	12.9	17.5	7.9	43.1	11.1	4.1	75	96.53	287	4.59	0.71	1.39	2.9	4.75	142	108	5	4.77	143	42.9	89.9	29.9
Don	Dor12	25	21.6041	116	87	161	56	Rec188	Dor12	Response	Dor12	Female	2022.10.29	0.001	63.881	0.019	13.247	0.118	0.009	1.02	6	75.7	45.5	30.2	1.51	5.9	15.1	10.9	19.3	8.6	42.6	11.8	4.9	71	102.1	267	4.88	0.58	1.75	2.59	4.23	141	107	3.81	4.94	147	44.4	89.9	29.9
Don	Dor12	25	21.6041	116	87	161	56	Rec211	Dor12	Response	Dor12	Female	2022.07.04	0.001	59.479	0.002	8.357	0.111	0.013	1.025	5	69.5	42.8	26.7	1.6	5.3	16.1	12.9	17.5	7.9	43.1	11.1	4.1	75	96.53	287	4.59	0.71	1.39	2.9	4.75	142	108	5	4.77	143	42.9	89.9	29.9
Don	Dor12	25	21.6041	116	87	161	56	Rec211	Dor12	Response	Dor12	Female	2022.10.29	0.001	63.881	0.019	13.247	0.118	0.009	1.02	6	75.7	45.5	30.2	1.51	5.9	15.1	10.9	19.3	8.6	42.6	11.8	4.9	71	102.1	267	4.88	0.58	1.75	2.59	4.23	141	107	3.81	4.94	147	44.4	89.9	29.9
Don	Dor12	25	21.6041	116	87	161	56	Rec252	Dor12	Response	Dor12	Female	2022.07.04	0.001	59.479	0.002	8.357	0.111	0.013	1.025	5	69.5	42.8	26.7	1.6	5.3	16.1	12.9	17.5	7.9	43.1	11.1	4.1	75	96.53	287	4.59	0.71	1.39	2.9	4.75	142	108	5	4.77	143	42.9	89.9	29.9
Don	Dor12	25	21.6041	116	87	161	56	Rec252	Dor12	Response	Dor12	Female	2022.10.29	0.001	63.881	0.019	13.247	0.118	0.009	1.02	6	75.7	45.5	30.2	1.51	5.9	15.1	10.9	19.3	8.6	42.6	11.8	4.9	71	102.1	267	4.88	0.58	1.75	2.59	4.23	141	107	3.81	4.94	147	44.4	89.9	29.9
Don	Dor12	25	21.6041	116	87	161	56	Rec272	Dor12	Nonresponse	Dor12	Female	2022.07.04	0.001	59.479	0.002	8.357	0.111	0.013	1.025	5	69.5	42.8	26.7	1.6	5.3	16.1	12.9	17.5	7.9	43.1	11.1	4.1	75	96.53	287	4.59	0.71	1.39	2.9	4.75	142	108	5	4.77	143	42.9	89.9	29.9
Don	Dor12	25	21.6041	116	87	161	56	Rec272	Dor12	Nonresponse	Dor12	Female	2022.10.29	0.001	63.881	0.019	13.247	0.118	0.009	1.02	6	75.7	45.5	30.2	1.51	5.9	15.1	10.9	19.3	8.6	42.6	11.8	4.9	71	102.1	267	4.88	0.58	1.75	2.59	4.23	141	107	3.81	4.94	147	44.4	89.9	29.9
Don	Dor12	25	21.6041	116	87	161	56	Rec291	Dor12	Response	Dor12	Female	2022.07.04	0.001	59.479	0.002	8.357	0.111	0.013	1.025	5	69.5	42.8	26.7	1.6	5.3	16.1	12.9	17.5	7.9	43.1	11.1	4.1	75	96.53	287	4.59	0.71	1.39	2.9	4.75	142	108	5	4.77	143	42.9	89.9	29.9
Don	Dor12	25	21.6041	116	87	161	56	Rec291	Dor12	Response	Dor12	Female	2022.10.29	0.001	63.881	0.019	13.247	0.118	0.009	1.02	6	75.7	45.5	30.2	1.51	5.9	15.1	10.9	19.3	8.6	42.6	11.8	4.9	71	102.1	267	4.88	0.58	1.75	2.59	4.23	141	107	3.81	4.94	147	44.4	89.9	29.9
Don	Dor12	25	21.6041	116	87	161	56	Rec313	Dor12	Response	Dor12	Female	2022.07.04	0.001	59.479	0.002	8.357	0.111	0.013	1.025	5	69.5	42.8	26.7	1.6	5.3	16.1	12.9	17.5	7.9	43.1	11.1	4.1	75	96.53	287	4.59	0.71	1.39	2.9	4.75	142	108	5	4.77	143	42.9	89.9	29.9
Don	Dor12	25	21.6041	116	87	161	56	Rec313	Dor12	Response	Dor12	Female	2022.10.29	0.001	63.881	0.019	13.247	0.118	0.009	1.02	6	75.7	45.5	30.2	1.51	5.9	15.1	10.9	19.3	8.6	42.6	11.8	4.9	71	102.1	267	4.88	0.58	1.75	2.59	4.23	141	107	3.81	4.94	147	44.4	89.9	29.9
Don	Dor12	25	21.6041	116	87	161	56	Rec316	Dor12	Response	Dor12	Female	2022.07.04	0.001	59.479	0.002	8.357	0.111	0.013	1.025	5	69.5	42.8	26.7	1.6	5.3	16.1	12.9	17.5	7.9	43.1	11.1	4.1	75	96.53	287	4.59	0.71	1.39	2.9	4.75	142	108	5	4.77	143	42.9	89.9	29.9
Don	Dor12	25	21.6041	116	87	161	56	Rec316	Dor12	Response	Dor12	Female	2022.10.29	0.001	63.881	0.019	13.247	0.118	0.009	1.02	6	75.7	45.5	30.2	1.51	5.9	15.1	10.9	19.3	8.6	42.6	11.8	4.9	71	102.1	267	4.88	0.58	1.75	2.59	4.23	141	107	3.81	4.94	147	44.4	89.9	29.9
Don	Dor12	25	21.6041	116	87	161	56	Rec330	Dor12	Nonresponse	Dor12	Female	2022.07.04	0.001	59.479	0.002	8.357	0.111	0.013	1.025	5	69.5	42.8	26.7	1.6	5.3	16.1	12.9	17.5	7.9	43.1	11.1	4.1	75	96.53	287	4.59	0.71	1.39	2.9	4.75	142	108	5	4.77	143	42.9	89.9	29.9
Don	Dor12	25	21.6041	116	87	161	56	Rec330	Dor12	Nonresponse	Dor12	Female	2022.10.29	0.001	63.881	0.019	13.247	0.118	0.009	1.02	6	75.7	45.5	30.2	1.51	5.9	15.1	10.9	19.3	8.6	42.6	11.8	4.9	71	102.1	267	4.88	0.58	1.75	2.59	4.23	141	107	3.81	4.94	147	44.4	89.9	29.9
Don	Dor12	25	21.6041	116	87	161	56	Rec339	Dor12	Nonresponse	Dor12	Female	2022.07.04	0.001	59.479	0.002	8.357	0.111	0.013	1.025	5	69.5	42.8	26.7	1.6	5.3	16.1	12.9	17.5	7.9	43.1	11.1	4.1	75	96.53	287	4.59	0.71	1.39	2.9	4.75	142	108	5	4.77	143	42.9	89.9	29.9
Don	Dor12	25	21.6041	116	87	161	56	Rec339	Dor12	Nonresponse	Dor12	Female	2022.10.29	0.001	63.881	0.019	13.247	0.118	0.009	1.02	6	75.7	45.5	30.2	1.51	5.9	15.1	10.9	19.3	8.6	42.6	11.8	4.9	71	102.1	267	4.88	0.58	1.75	2.59	4.23	141	107	3.81	4.94	147	44.4	89.9	29.9
Don	Dor12	25	21.6041	116	87	161	56	Rec353	Dor12	Response	Dor12	Female	2022.07.04	0.001	59.479	0.002	8.357	0.111	0.013	1.025	5	69.5	42.8	26.7	1.6	5.3	16.1	12.9	17.5	7.9	43.1	11.1	4.1	75	96.53	287	4.59	0.71	1.39	2.9	4.75	142	108	5	4.77	143	42.9	89.9	29.9
Don	Dor12	25	21.6041	116	87	161	56	Rec353	Dor12	Response	Dor12	Female	2022.10.29	0.001	63.881	0.019	13.247	0.118	0.009	1.02	6	75.7	45.5	30.2	1.51	5.9	15.1	10.9	19.3	8.6	42.6	11.8	4.9	71	102.1	267	4.88	0.58	1.75	2.59	4.23	141	107	3.81	4.94	147	44.4	89.9	29.9
Don	Dor12	25	21.6041	116	87	161	56	Rec355	Dor12	Nonresponse	Dor12	Female	2022.07.04	0.001	59.479	0.002	8.357	0.111	0.013	1.025	5	69.5	42.8	26.7	1.6	5.3	16.1	12.9	17.5	7.9	43.1	11.1	4.1	75	96.53	287	4.59	0.71	1.39	2.9	4.75	142	108	5	4.77	143	42.9	89.9	29.9
Don	Dor12	25	21.6041	116	87	161	56	Rec355	Dor12	Nonresponse	Dor12	Female	2022.10.29	0.001	63.881	0.019	13.247	0.118	0.009	1.02	6	75.7	45.5	30.2	1.51	5.9	15.1	10.9	19.3	8.6	42.6	11.8	4.9	71	102.1	267	4.88	0.58	1.75	2.59	4.23	141	107	3.81	4.94	147	44.4	89.9	29.9
Don	Dor12	25	21.6041	116	87	161	56	Rec366	Dor12	Response	Dor12	Female	2022.07.04	0.001	59.479	0.002	8.357	0.111	0.013	1.025	5	69.5	42.8	26.7	1.6	5.3	16.1	12.9	17.5	7.9	43.1	11.1	4.1	75	96.53	287	4.59	0.71	1.39	2.9	4.75	142	108	5	4.77	143	42.9	89.9	29.9
Don	Dor12	25	21.6041	116	87	161	56	Rec366	Dor12	Response	Dor12	Female	2022.10.29	0.001	63.881	0.019	13.247	0.118	0.009	1.02	6	75.7	45.5	30.2	1.51	5.9	15.1	10.9	19.3	8.6	42.6	11.8	4.9	71	102.1	267	4.88	0.58	1.75	2.59	4.23	141	107	3.81	4.94	147	44.4	89.9	29.9
Don	Dor12	25	21.6041	116	87	161	56	Rec4	Dor12	Response	Dor12	Female	2022.07.04	0.001	59.479	0.002	8.357	0.111	0.013	1.025	5	69.5	42.8	26.7	1.6	5.3	16.1	12.9	17.5	7.9	43.1	11.1	4.1	75	96.53	287	4.59	0.71	1.39	2.9	4.75	142	108	5	4.77	143	42.9	89.9	29.9
Don	Dor12	25	21.6041	116	87	161	56	Rec4	Dor12	Response	Dor12	Female	2022.10.29	0.001	63.881	0.019	13.247	0.118	0.009	1.02	6	75.7	45.5	30.2	1.51	5.9	15.1	10.9	19.3	8.6	42.6	11.8	4.9	71	102.1	267	4.88	0.58	1.75	2.59	4.23	141	107	3.81	4.94	147	44.4	89.9	29.9
Don	Dor12	25	21.6041	116	87	161	56	Rec7	Dor12	Response	Dor12	Female	2022.07.04	0.001	59.479	0.002	8.357	0.111	0.013	1.025	5	69.5	42.8	26.7	1.6	5.3	16.1	12.9	17.5	7.9	43.1	11.1	4.1	75	96.53	287	4.59	0.71	1.39	2.9	4.75	142	108	5	4.77	143	42.9	89.9	29.9
Don	Dor12	25	21.6041	116	87	161	56	Rec7	Dor12	Response	Dor12	Female	2022.10.29	0.001	63.881	0.019	13.247	0.118	0.009	1.02	6	75.7	45.5	30.2	1.51	5.9	15.1	10.9	19.3	8.6	42.6	11.8	4.9	71	102.1	267	4.88	0.58	1.75	2.59	4.23	141	107	3.81	4.94	147	44.4	89.9	29.9
Don	Dor12	25	21.6041	116	87	161	56	Rec72	Dor12	Response	Dor12	Female	2022.07.04	0.001	59.479	0.002	8.357	0.111	0.013	1.025	5	69.5	42.8	26.7	1.6	5.3	16.1	12.9	17.5	7.9	43.1	11.1	4.1	75	96.53	287	4.59	0.71	1.39	2.9	4.75	142	108	5	4.77	143	42.9	89.9	29.9
Don	Dor12	25	21.6041	116	87	161	56	Rec72	Dor12	Response	Dor12	Female	2022.10.29	0.001	63.881	0.019	13.247	0.118	0.009	1.02	6	75.7	45.5	30.2	1.51	5.9	15.1	10.9	19.3	8.6	42.6	11.8	4.9	71	102.1	267	4.88	0.58	1.75	2.59	4.23	141	107	3.81	4.94	147	44.4	89.9	29.9
Don	Dor12	25	21.6041	116	87	161	56	Rec90	Dor12	Nonresponse	Dor12	Female	2022.07.04	0.001	59.479	0.002	8.357	0.111	0.013	1.025	5	69.5	42.8	26.7	1.6	5.3	16.1	12.9	17.5	7.9	43.1	11.1	4.1	75	96.53	287	4.59	0.71	1.39	2.9	4.75	142	108	5	4.77	143	42.9	89.9	29.9
Don	Dor12	25	21.6041	116	87	161	56	Rec90	Dor12	Nonresponse	Dor12	Female	2022.10.29	0.001	63.881	0.019	13.247	0.118	0.009	1.02	6	75.7	45.5	30.2	1.51	5.9	15.1	10.9	19.3	8.6	42.6	11.8	4.9	71	102.1	267	4.88	0.58	1.75	2.59	4.23	141	107	3.81	4.94	147	44.4	89.9	29.9
Don	Dor12	25	21.6041	116	87	161	56	Rec98	Dor12	Response	Dor12	Female	2022.07.04	0.001	59.479	0.002	8.357	0.111	0.013	1.025	5	69.5	42.8	26.7	1.6	5.3	16.1	12.9	17.5	7.9	43.1	11.1	4.1	75	96.53	287	4.59	0.71	1.39	2.9	4.75	142	108	5	4.77	143	42.9	89.9	29.9
Don	Dor12	25	21.6041	116	87	161	56	Rec98	Dor12	Response	Dor12	Female	2022.10.29	0.001	63.881	0.019	13.247	0.118	0.009	1.02	6	75.7	45.5	30.2	1.51	5.9	15.1	10.9	19.3	8.6	42.6	11.8	4.9	71	102.1	267	4.88	0.58	1.75	2.59	4.23	141	107	3.81	4.94	147	44.4	89.9	29.9
Don	Dor12	25	21.6041	116	87	161	56	Rec99	Dor12	Nonresponse	Dor12	Female	2022.07.04	0.001	59.479	0.002	8.357	0.111	0.013	1.025	5	69.5	42.8	26.7	1.6	5.3	16.1	12.9	17.5	7.9	43.1	11.1	4.1	75	96.53	287	4.59	0.71	1.39	2.9	4.75	142	108	5	4.77	143	42.9	89.9	29.9
Don	Dor12	25	21.6041	116	87	161	56	Rec99	Dor12	Nonresponse	Dor12	Female	2022.10.29	0.001	63.881	0.019	13.247	0.118	0.009	1.02	6	75.7	45.5	30.2	1.51	5.9	15.1	10.9	19.3	8.6	42.6	11.8	4.9	71	102.1	267	4.88	0.58	1.75	2.59	4.23	141	107	3.81	4.94	147	44.4	89.9	29.9
Don	Dor13	27	22.9313	117	88	177.2	72	Rec113	Dor13	Response	Dor13	Male	2018.12.01	0.503	5.79	0.104	1.46	2.15	0.033			83	53	30	1.76	3.6	13.5	10.2	16.9	4.5	70.1	12.7	4.66	73.7		305.5	3.46	0.7	1.32	2.03	4.29	142	102	6.87	4.93	160	45.8	92.9	32.5
Don	Dor13	27	22.9313	117	88	177.2	72	Rec113	Dor13	Response	Dor13	Male	2018.08.01	0.425	6.96	0.111	1.56	2.14	0.026			78	51	27	1.89	6.1	19.4	13	14	4.5	78	12.1	4	76.2		281.2	3.65	1.26	1.32	2.07	4.31	142	102	6.16	4.94	156	46.4	94.1	31.6
Don	Dor13	27	22.9313	117	88	177.2	72	Rec113	Dor13	Response	Dor13	Male	2017.01.01	0.646	2	0.117	1.61	2.04	0.037	1.025	5	81	52	29	1.79	2.5	13.5	14.3	20.2	6	65.4	8.9	4.4	74		275.2	4.17	0.7	1.35	1.87	4.67	142	106	5.75	4.88	157	45.6	93.5	32.1
Don	Dor13	27	22.9313	117	88	177.2	72	Rec113	Dor13	Response	Dor13	Male	2019.06.01	0.571	3.63	0.098	1.58	2.27	0.031	1.02	6	82	56	26	2.12	6.8	27.7	11.6	14.9	5.2	61.1	12.3	3.22	79.6	116.7	297.3	3.79	1.19	1.12	2.16	4.14	143	100	5.5	4.99	158	48.3	96.7	31.6
Don	Dor13	27	22.9313	117	88	177.2	72	Rec113	Dor13	Response	Dor13	Male	2019.03.01	0.374	2.82	0.081	1.51	2.26	0.025			79	55	24	2.36	5.4	20.4	11.3	15.9	4.5	63.9	12.3	4.5	71.7	121.8	241.9	3.67	0.69	1.4	2.05	4.46	141	104	5.35	4.71	150	43.8	93.1	31.9
Don	Dor13	27	22.9313	117	88	177.2	72	Rec148	Dor13	Nonresponse	Dor13	Male	2018.12.01	0.503	5.79	0.104	1.46	2.15	0.033			83	53	30	1.76	3.6	13.5	10.2	16.9	4.5	70.1	12.7	4.66	73.7		305.5	3.46	0.7	1.32	2.03	4.29	142	102	6.87	4.93	160	45.8	92.9	32.5
Don	Dor13	27	22.9313	117	88	177.2	72	Rec148	Dor13	Nonresponse	Dor13	Male	2018.08.01	0.425	6.96	0.111	1.56	2.14	0.026			78	51	27	1.89	6.1	19.4	13	14	4.5	78	12.1	4	76.2		281.2	3.65	1.26	1.32	2.07	4.31	142	102	6.16	4.94	156	46.4	94.1	31.6
Don	Dor13	27	22.9313	117	88	177.2	72	Rec148	Dor13	Nonresponse	Dor13	Male	2017.01.01	0.646	2	0.117	1.61	2.04	0.037	1.025	5	81	52	29	1.79	2.5	13.5	14.3	20.2	6	65.4	8.9	4.4	74		275.2	4.17	0.7	1.35	1.87	4.67	142	106	5.75	4.88	157	45.6	93.5	32.1
Don	Dor13	27	22.9313	117	88	177.2	72	Rec148	Dor13	Nonresponse	Dor13	Male	2019.06.01	0.571	3.63	0.098	1.58	2.27	0.031	1.02	6	82	56	26	2.12	6.8	27.7	11.6	14.9	5.2	61.1	12.3	3.22	79.6	116.7	297.3	3.79	1.19	1.12	2.16	4.14	143	100	5.5	4.99	158	48.3	96.7	31.6
Don	Dor13	27	22.9313	117	88	177.2	72	Rec148	Dor13	Nonresponse	Dor13	Male	2019.03.01	0.374	2.82	0.081	1.51	2.26	0.025			79	55	24	2.36	5.4	20.4	11.3	15.9	4.5	63.9	12.3	4.5	71.7	121.8	241.9	3.67	0.69	1.4	2.05	4.46	141	104	5.35	4.71	150	43.8	93.1	31.9
Don	Dor13	27	22.9313	117	88	177.2	72	Rec149	Dor13	Nonresponse	Dor13	Male	2018.12.01	0.503	5.79	0.104	1.46	2.15	0.033			83	53	30	1.76	3.6	13.5	10.2	16.9	4.5	70.1	12.7	4.66	73.7		305.5	3.46	0.7	1.32	2.03	4.29	142	102	6.87	4.93	160	45.8	92.9	32.5
Don	Dor13	27	22.9313	117	88	177.2	72	Rec149	Dor13	Nonresponse	Dor13	Male	2018.08.01	0.425	6.96	0.111	1.56	2.14	0.026			78	51	27	1.89	6.1	19.4	13	14	4.5	78	12.1	4	76.2		281.2	3.65	1.26	1.32	2.07	4.31	142	102	6.16	4.94	156	46.4	94.1	31.6
Don	Dor13	27	22.9313	117	88	177.2	72	Rec149	Dor13	Nonresponse	Dor13	Male	2017.01.01	0.646	2	0.117	1.61	2.04	0.037	1.025	5	81	52	29	1.79	2.5	13.5	14.3	20.2	6	65.4	8.9	4.4	74		275.2	4.17	0.7	1.35	1.87	4.67	142	106	5.75	4.88	157	45.6	93.5	32.1
Don	Dor13	27	22.9313	117	88	177.2	72	Rec149	Dor13	Nonresponse	Dor13	Male	2019.06.01	0.571	3.63	0.098	1.58	2.27	0.031	1.02	6	82	56	26	2.12	6.8	27.7	11.6	14.9	5.2	61.1	12.3	3.22	79.6	116.7	297.3	3.79	1.19	1.12	2.16	4.14	143	100	5.5	4.99	158	48.3	96.7	31.6
Don	Dor13	27	22.9313	117	88	177.2	72	Rec149	Dor13	Nonresponse	Dor13	Male	2019.03.01	0.374	2.82	0.081	1.51	2.26	0.025			79	55	24	2.36	5.4	20.4	11.3	15.9	4.5	63.9	12.3	4.5	71.7	121.8	241.9	3.67	0.69	1.4	2.05	4.46	141	104	5.35	4.71	150	43.8	93.1	31.9
Don	Dor13	27	22.9313	117	88	177.2	72	Rec163	Dor13	Response	Dor13	Male	2018.12.01	0.503	5.79	0.104	1.46	2.15	0.033			83	53	30	1.76	3.6	13.5	10.2	16.9	4.5	70.1	12.7	4.66	73.7		305.5	3.46	0.7	1.32	2.03	4.29	142	102	6.87	4.93	160	45.8	92.9	32.5
Don	Dor13	27	22.9313	117	88	177.2	72	Rec163	Dor13	Response	Dor13	Male	2018.08.01	0.425	6.96	0.111	1.56	2.14	0.026			78	51	27	1.89	6.1	19.4	13	14	4.5	78	12.1	4	76.2		281.2	3.65	1.26	1.32	2.07	4.31	142	102	6.16	4.94	156	46.4	94.1	31.6
Don	Dor13	27	22.9313	117	88	177.2	72	Rec163	Dor13	Response	Dor13	Male	2017.01.01	0.646	2	0.117	1.61	2.04	0.037	1.025	5	81	52	29	1.79	2.5	13.5	14.3	20.2	6	65.4	8.9	4.4	74		275.2	4.17	0.7	1.35	1.87	4.67	142	106	5.75	4.88	157	45.6	93.5	32.1
Don	Dor13	27	22.9313	117	88	177.2	72	Rec163	Dor13	Response	Dor13	Male	2019.06.01	0.571	3.63	0.098	1.58	2.27	0.031	1.02	6	82	56	26	2.12	6.8	27.7	11.6	14.9	5.2	61.1	12.3	3.22	79.6	116.7	297.3	3.79	1.19	1.12	2.16	4.14	143	100	5.5	4.99	158	48.3	96.7	31.6
Don	Dor13	27	22.9313	117	88	177.2	72	Rec163	Dor13	Response	Dor13	Male	2019.03.01	0.374	2.82	0.081	1.51	2.26	0.025			79	55	24	2.36	5.4	20.4	11.3	15.9	4.5	63.9	12.3	4.5	71.7	121.8	241.9	3.67	0.69	1.4	2.05	4.46	141	104	5.35	4.71	150	43.8	93.1	31.9
Don	Dor13	27	22.9313	117	88	177.2	72	Rec165	Dor13	Response	Dor13	Male	2018.12.01	0.503	5.79	0.104	1.46	2.15	0.033			83	53	30	1.76	3.6	13.5	10.2	16.9	4.5	70.1	12.7	4.66	73.7		305.5	3.46	0.7	1.32	2.03	4.29	142	102	6.87	4.93	160	45.8	92.9	32.5
Don	Dor13	27	22.9313	117	88	177.2	72	Rec165	Dor13	Response	Dor13	Male	2018.08.01	0.425	6.96	0.111	1.56	2.14	0.026			78	51	27	1.89	6.1	19.4	13	14	4.5	78	12.1	4	76.2		281.2	3.65	1.26	1.32	2.07	4.31	142	102	6.16	4.94	156	46.4	94.1	31.6
Don	Dor13	27	22.9313	117	88	177.2	72	Rec165	Dor13	Response	Dor13	Male	2017.01.01	0.646	2	0.117	1.61	2.04	0.037	1.025	5	81	52	29	1.79	2.5	13.5	14.3	20.2	6	65.4	8.9	4.4	74		275.2	4.17	0.7	1.35	1.87	4.67	142	106	5.75	4.88	157	45.6	93.5	32.1
Don	Dor13	27	22.9313	117	88	177.2	72	Rec165	Dor13	Response	Dor13	Male	2019.06.01	0.571	3.63	0.098	1.58	2.27	0.031	1.02	6	82	56	26	2.12	6.8	27.7	11.6	14.9	5.2	61.1	12.3	3.22	79.6	116.7	297.3	3.79	1.19	1.12	2.16	4.14	143	100	5.5	4.99	158	48.3	96.7	31.6
Don	Dor13	27	22.9313	117	88	177.2	72	Rec165	Dor13	Response	Dor13	Male	2019.03.01	0.374	2.82	0.081	1.51	2.26	0.025			79	55	24	2.36	5.4	20.4	11.3	15.9	4.5	63.9	12.3	4.5	71.7	121.8	241.9	3.67	0.69	1.4	2.05	4.46	141	104	5.35	4.71	150	43.8	93.1	31.9
Don	Dor13	27	22.9313	117	88	177.2	72	Rec178	Dor13	Response	Dor13	Male	2018.12.01	0.503	5.79	0.104	1.46	2.15	0.033			83	53	30	1.76	3.6	13.5	10.2	16.9	4.5	70.1	12.7	4.66	73.7		305.5	3.46	0.7	1.32	2.03	4.29	142	102	6.87	4.93	160	45.8	92.9	32.5
Don	Dor13	27	22.9313	117	88	177.2	72	Rec178	Dor13	Response	Dor13	Male	2018.08.01	0.425	6.96	0.111	1.56	2.14	0.026			78	51	27	1.89	6.1	19.4	13	14	4.5	78	12.1	4	76.2		281.2	3.65	1.26	1.32	2.07	4.31	142	102	6.16	4.94	156	46.4	94.1	31.6
Don	Dor13	27	22.9313	117	88	177.2	72	Rec178	Dor13	Response	Dor13	Male	2017.01.01	0.646	2	0.117	1.61	2.04	0.037	1.025	5	81	52	29	1.79	2.5	13.5	14.3	20.2	6	65.4	8.9	4.4	74		275.2	4.17	0.7	1.35	1.87	4.67	142	106	5.75	4.88	157	45.6	93.5	32.1
Don	Dor13	27	22.9313	117	88	177.2	72	Rec178	Dor13	Response	Dor13	Male	2019.06.01	0.571	3.63	0.098	1.58	2.27	0.031	1.02	6	82	56	26	2.12	6.8	27.7	11.6	14.9	5.2	61.1	12.3	3.22	79.6	116.7	297.3	3.79	1.19	1.12	2.16	4.14	143	100	5.5	4.99	158	48.3	96.7	31.6
Don	Dor13	27	22.9313	117	88	177.2	72	Rec178	Dor13	Response	Dor13	Male	2019.03.01	0.374	2.82	0.081	1.51	2.26	0.025			79	55	24	2.36	5.4	20.4	11.3	15.9	4.5	63.9	12.3	4.5	71.7	121.8	241.9	3.67	0.69	1.4	2.05	4.46	141	104	5.35	4.71	150	43.8	93.1	31.9
Don	Dor13	27	22.9313	117	88	177.2	72	Rec223	Dor13	Response	Dor13	Male	2018.12.01	0.503	5.79	0.104	1.46	2.15	0.033			83	53	30	1.76	3.6	13.5	10.2	16.9	4.5	70.1	12.7	4.66	73.7		305.5	3.46	0.7	1.32	2.03	4.29	142	102	6.87	4.93	160	45.8	92.9	32.5
Don	Dor13	27	22.9313	117	88	177.2	72	Rec223	Dor13	Response	Dor13	Male	2018.08.01	0.425	6.96	0.111	1.56	2.14	0.026			78	51	27	1.89	6.1	19.4	13	14	4.5	78	12.1	4	76.2		281.2	3.65	1.26	1.32	2.07	4.31	142	102	6.16	4.94	156	46.4	94.1	31.6
Don	Dor13	27	22.9313	117	88	177.2	72	Rec223	Dor13	Response	Dor13	Male	2017.01.01	0.646	2	0.117	1.61	2.04	0.037	1.025	5	81	52	29	1.79	2.5	13.5	14.3	20.2	6	65.4	8.9	4.4	74		275.2	4.17	0.7	1.35	1.87	4.67	142	106	5.75	4.88	157	45.6	93.5	32.1
Don	Dor13	27	22.9313	117	88	177.2	72	Rec223	Dor13	Response	Dor13	Male	2019.06.01	0.571	3.63	0.098	1.58	2.27	0.031	1.02	6	82	56	26	2.12	6.8	27.7	11.6	14.9	5.2	61.1	12.3	3.22	79.6	116.7	297.3	3.79	1.19	1.12	2.16	4.14	143	100	5.5	4.99	158	48.3	96.7	31.6
Don	Dor13	27	22.9313	117	88	177.2	72	Rec223	Dor13	Response	Dor13	Male	2019.03.01	0.374	2.82	0.081	1.51	2.26	0.025			79	55	24	2.36	5.4	20.4	11.3	15.9	4.5	63.9	12.3	4.5	71.7	121.8	241.9	3.67	0.69	1.4	2.05	4.46	141	104	5.35	4.71	150	43.8	93.1	31.9
Don	Dor13	27	22.9313	117	88	177.2	72	Rec255	Dor13	Response	Dor13	Male	2018.12.01	0.503	5.79	0.104	1.46	2.15	0.033			83	53	30	1.76	3.6	13.5	10.2	16.9	4.5	70.1	12.7	4.66	73.7		305.5	3.46	0.7	1.32	2.03	4.29	142	102	6.87	4.93	160	45.8	92.9	32.5
Don	Dor13	27	22.9313	117	88	177.2	72	Rec255	Dor13	Response	Dor13	Male	2018.08.01	0.425	6.96	0.111	1.56	2.14	0.026			78	51	27	1.89	6.1	19.4	13	14	4.5	78	12.1	4	76.2		281.2	3.65	1.26	1.32	2.07	4.31	142	102	6.16	4.94	156	46.4	94.1	31.6
Don	Dor13	27	22.9313	117	88	177.2	72	Rec255	Dor13	Response	Dor13	Male	2017.01.01	0.646	2	0.117	1.61	2.04	0.037	1.025	5	81	52	29	1.79	2.5	13.5	14.3	20.2	6	65.4	8.9	4.4	74		275.2	4.17	0.7	1.35	1.87	4.67	142	106	5.75	4.88	157	45.6	93.5	32.1
Don	Dor13	27	22.9313	117	88	177.2	72	Rec255	Dor13	Response	Dor13	Male	2019.06.01	0.571	3.63	0.098	1.58	2.27	0.031	1.02	6	82	56	26	2.12	6.8	27.7	11.6	14.9	5.2	61.1	12.3	3.22	79.6	116.7	297.3	3.79	1.19	1.12	2.16	4.14	143	100	5.5	4.99	158	48.3	96.7	31.6
Don	Dor13	27	22.9313	117	88	177.2	72	Rec255	Dor13	Response	Dor13	Male	2019.03.01	0.374	2.82	0.081	1.51	2.26	0.025			79	55	24	2.36	5.4	20.4	11.3	15.9	4.5	63.9	12.3	4.5	71.7	121.8	241.9	3.67	0.69	1.4	2.05	4.46	141	104	5.35	4.71	150	43.8	93.1	31.9
Don	Dor13	27	22.9313	117	88	177.2	72	Rec266	Dor13	Response	Dor13	Male	2018.12.01	0.503	5.79	0.104	1.46	2.15	0.033			83	53	30	1.76	3.6	13.5	10.2	16.9	4.5	70.1	12.7	4.66	73.7		305.5	3.46	0.7	1.32	2.03	4.29	142	102	6.87	4.93	160	45.8	92.9	32.5
Don	Dor13	27	22.9313	117	88	177.2	72	Rec266	Dor13	Response	Dor13	Male	2018.08.01	0.425	6.96	0.111	1.56	2.14	0.026			78	51	27	1.89	6.1	19.4	13	14	4.5	78	12.1	4	76.2		281.2	3.65	1.26	1.32	2.07	4.31	142	102	6.16	4.94	156	46.4	94.1	31.6
Don	Dor13	27	22.9313	117	88	177.2	72	Rec266	Dor13	Response	Dor13	Male	2017.01.01	0.646	2	0.117	1.61	2.04	0.037	1.025	5	81	52	29	1.79	2.5	13.5	14.3	20.2	6	65.4	8.9	4.4	74		275.2	4.17	0.7	1.35	1.87	4.67	142	106	5.75	4.88	157	45.6	93.5	32.1
Don	Dor13	27	22.9313	117	88	177.2	72	Rec266	Dor13	Response	Dor13	Male	2019.06.01	0.571	3.63	0.098	1.58	2.27	0.031	1.02	6	82	56	26	2.12	6.8	27.7	11.6	14.9	5.2	61.1	12.3	3.22	79.6	116.7	297.3	3.79	1.19	1.12	2.16	4.14	143	100	5.5	4.99	158	48.3	96.7	31.6
Don	Dor13	27	22.9313	117	88	177.2	72	Rec266	Dor13	Response	Dor13	Male	2019.03.01	0.374	2.82	0.081	1.51	2.26	0.025			79	55	24	2.36	5.4	20.4	11.3	15.9	4.5	63.9	12.3	4.5	71.7	121.8	241.9	3.67	0.69	1.4	2.05	4.46	141	104	5.35	4.71	150	43.8	93.1	31.9
Don	Dor13	27	22.9313	117	88	177.2	72	Rec274	Dor13	Response	Dor13	Male	2018.12.01	0.503	5.79	0.104	1.46	2.15	0.033			83	53	30	1.76	3.6	13.5	10.2	16.9	4.5	70.1	12.7	4.66	73.7		305.5	3.46	0.7	1.32	2.03	4.29	142	102	6.87	4.93	160	45.8	92.9	32.5
Don	Dor13	27	22.9313	117	88	177.2	72	Rec274	Dor13	Response	Dor13	Male	2018.08.01	0.425	6.96	0.111	1.56	2.14	0.026			78	51	27	1.89	6.1	19.4	13	14	4.5	78	12.1	4	76.2		281.2	3.65	1.26	1.32	2.07	4.31	142	102	6.16	4.94	156	46.4	94.1	31.6
Don	Dor13	27	22.9313	117	88	177.2	72	Rec274	Dor13	Response	Dor13	Male	2017.01.01	0.646	2	0.117	1.61	2.04	0.037	1.025	5	81	52	29	1.79	2.5	13.5	14.3	20.2	6	65.4	8.9	4.4	74		275.2	4.17	0.7	1.35	1.87	4.67	142	106	5.75	4.88	157	45.6	93.5	32.1
Don	Dor13	27	22.9313	117	88	177.2	72	Rec274	Dor13	Response	Dor13	Male	2019.06.01	0.571	3.63	0.098	1.58	2.27	0.031	1.02	6	82	56	26	2.12	6.8	27.7	11.6	14.9	5.2	61.1	12.3	3.22	79.6	116.7	297.3	3.79	1.19	1.12	2.16	4.14	143	100	5.5	4.99	158	48.3	96.7	31.6
Don	Dor13	27	22.9313	117	88	177.2	72	Rec274	Dor13	Response	Dor13	Male	2019.03.01	0.374	2.82	0.081	1.51	2.26	0.025			79	55	24	2.36	5.4	20.4	11.3	15.9	4.5	63.9	12.3	4.5	71.7	121.8	241.9	3.67	0.69	1.4	2.05	4.46	141	104	5.35	4.71	150	43.8	93.1	31.9
Don	Dor13	27	22.9313	117	88	177.2	72	Rec279	Dor13	Response	Dor13	Male	2018.12.01	0.503	5.79	0.104	1.46	2.15	0.033			83	53	30	1.76	3.6	13.5	10.2	16.9	4.5	70.1	12.7	4.66	73.7		305.5	3.46	0.7	1.32	2.03	4.29	142	102	6.87	4.93	160	45.8	92.9	32.5
Don	Dor13	27	22.9313	117	88	177.2	72	Rec279	Dor13	Response	Dor13	Male	2018.08.01	0.425	6.96	0.111	1.56	2.14	0.026			78	51	27	1.89	6.1	19.4	13	14	4.5	78	12.1	4	76.2		281.2	3.65	1.26	1.32	2.07	4.31	142	102	6.16	4.94	156	46.4	94.1	31.6
Don	Dor13	27	22.9313	117	88	177.2	72	Rec279	Dor13	Response	Dor13	Male	2017.01.01	0.646	2	0.117	1.61	2.04	0.037	1.025	5	81	52	29	1.79	2.5	13.5	14.3	20.2	6	65.4	8.9	4.4	74		275.2	4.17	0.7	1.35	1.87	4.67	142	106	5.75	4.88	157	45.6	93.5	32.1
Don	Dor13	27	22.9313	117	88	177.2	72	Rec279	Dor13	Response	Dor13	Male	2019.06.01	0.571	3.63	0.098	1.58	2.27	0.031	1.02	6	82	56	26	2.12	6.8	27.7	11.6	14.9	5.2	61.1	12.3	3.22	79.6	116.7	297.3	3.79	1.19	1.12	2.16	4.14	143	100	5.5	4.99	158	48.3	96.7	31.6
Don	Dor13	27	22.9313	117	88	177.2	72	Rec279	Dor13	Response	Dor13	Male	2019.03.01	0.374	2.82	0.081	1.51	2.26	0.025			79	55	24	2.36	5.4	20.4	11.3	15.9	4.5	63.9	12.3	4.5	71.7	121.8	241.9	3.67	0.69	1.4	2.05	4.46	141	104	5.35	4.71	150	43.8	93.1	31.9
Don	Dor13	27	22.9313	117	88	177.2	72	Rec369	Dor13	Response	Dor13	Male	2018.12.01	0.503	5.79	0.104	1.46	2.15	0.033			83	53	30	1.76	3.6	13.5	10.2	16.9	4.5	70.1	12.7	4.66	73.7		305.5	3.46	0.7	1.32	2.03	4.29	142	102	6.87	4.93	160	45.8	92.9	32.5
Don	Dor13	27	22.9313	117	88	177.2	72	Rec369	Dor13	Response	Dor13	Male	2018.08.01	0.425	6.96	0.111	1.56	2.14	0.026			78	51	27	1.89	6.1	19.4	13	14	4.5	78	12.1	4	76.2		281.2	3.65	1.26	1.32	2.07	4.31	142	102	6.16	4.94	156	46.4	94.1	31.6
Don	Dor13	27	22.9313	117	88	177.2	72	Rec369	Dor13	Response	Dor13	Male	2017.01.01	0.646	2	0.117	1.61	2.04	0.037	1.025	5	81	52	29	1.79	2.5	13.5	14.3	20.2	6	65.4	8.9	4.4	74		275.2	4.17	0.7	1.35	1.87	4.67	142	106	5.75	4.88	157	45.6	93.5	32.1
Don	Dor13	27	22.9313	117	88	177.2	72	Rec369	Dor13	Response	Dor13	Male	2019.06.01	0.571	3.63	0.098	1.58	2.27	0.031	1.02	6	82	56	26	2.12	6.8	27.7	11.6	14.9	5.2	61.1	12.3	3.22	79.6	116.7	297.3	3.79	1.19	1.12	2.16	4.14	143	100	5.5	4.99	158	48.3	96.7	31.6
Don	Dor13	27	22.9313	117	88	177.2	72	Rec369	Dor13	Response	Dor13	Male	2019.03.01	0.374	2.82	0.081	1.51	2.26	0.025			79	55	24	2.36	5.4	20.4	11.3	15.9	4.5	63.9	12.3	4.5	71.7	121.8	241.9	3.67	0.69	1.4	2.05	4.46	141	104	5.35	4.71	150	43.8	93.1	31.9
Don	Dor13	27	22.9313	117	88	177.2	72	Rec8	Dor13	Response	Dor13	Male	2018.12.01	0.503	5.79	0.104	1.46	2.15	0.033			83	53	30	1.76	3.6	13.5	10.2	16.9	4.5	70.1	12.7	4.66	73.7		305.5	3.46	0.7	1.32	2.03	4.29	142	102	6.87	4.93	160	45.8	92.9	32.5
Don	Dor13	27	22.9313	117	88	177.2	72	Rec8	Dor13	Response	Dor13	Male	2018.08.01	0.425	6.96	0.111	1.56	2.14	0.026			78	51	27	1.89	6.1	19.4	13	14	4.5	78	12.1	4	76.2		281.2	3.65	1.26	1.32	2.07	4.31	142	102	6.16	4.94	156	46.4	94.1	31.6
Don	Dor13	27	22.9313	117	88	177.2	72	Rec8	Dor13	Response	Dor13	Male	2017.01.01	0.646	2	0.117	1.61	2.04	0.037	1.025	5	81	52	29	1.79	2.5	13.5	14.3	20.2	6	65.4	8.9	4.4	74		275.2	4.17	0.7	1.35	1.87	4.67	142	106	5.75	4.88	157	45.6	93.5	32.1
Don	Dor13	27	22.9313	117	88	177.2	72	Rec8	Dor13	Response	Dor13	Male	2019.06.01	0.571	3.63	0.098	1.58	2.27	0.031	1.02	6	82	56	26	2.12	6.8	27.7	11.6	14.9	5.2	61.1	12.3	3.22	79.6	116.7	297.3	3.79	1.19	1.12	2.16	4.14	143	100	5.5	4.99	158	48.3	96.7	31.6
Don	Dor13	27	22.9313	117	88	177.2	72	Rec8	Dor13	Response	Dor13	Male	2019.03.01	0.374	2.82	0.081	1.51	2.26	0.025			79	55	24	2.36	5.4	20.4	11.3	15.9	4.5	63.9	12.3	4.5	71.7	121.8	241.9	3.67	0.69	1.4	2.05	4.46	141	104	5.35	4.71	150	43.8	93.1	31.9
Don	Dor13	27	22.9313	117	88	177.2	72	Rec82	Dor13	Nonresponse	Dor13	Male	2018.12.01	0.503	5.79	0.104	1.46	2.15	0.033			83	53	30	1.76	3.6	13.5	10.2	16.9	4.5	70.1	12.7	4.66	73.7		305.5	3.46	0.7	1.32	2.03	4.29	142	102	6.87	4.93	160	45.8	92.9	32.5
Don	Dor13	27	22.9313	117	88	177.2	72	Rec82	Dor13	Nonresponse	Dor13	Male	2018.08.01	0.425	6.96	0.111	1.56	2.14	0.026			78	51	27	1.89	6.1	19.4	13	14	4.5	78	12.1	4	76.2		281.2	3.65	1.26	1.32	2.07	4.31	142	102	6.16	4.94	156	46.4	94.1	31.6
Don	Dor13	27	22.9313	117	88	177.2	72	Rec82	Dor13	Nonresponse	Dor13	Male	2017.01.01	0.646	2	0.117	1.61	2.04	0.037	1.025	5	81	52	29	1.79	2.5	13.5	14.3	20.2	6	65.4	8.9	4.4	74		275.2	4.17	0.7	1.35	1.87	4.67	142	106	5.75	4.88	157	45.6	93.5	32.1
Don	Dor13	27	22.9313	117	88	177.2	72	Rec82	Dor13	Nonresponse	Dor13	Male	2019.06.01	0.571	3.63	0.098	1.58	2.27	0.031	1.02	6	82	56	26	2.12	6.8	27.7	11.6	14.9	5.2	61.1	12.3	3.22	79.6	116.7	297.3	3.79	1.19	1.12	2.16	4.14	143	100	5.5	4.99	158	48.3	96.7	31.6
Don	Dor13	27	22.9313	117	88	177.2	72	Rec82	Dor13	Nonresponse	Dor13	Male	2019.03.01	0.374	2.82	0.081	1.51	2.26	0.025			79	55	24	2.36	5.4	20.4	11.3	15.9	4.5	63.9	12.3	4.5	71.7	121.8	241.9	3.67	0.69	1.4	2.05	4.46	141	104	5.35	4.71	150	43.8	93.1	31.9
Don	Dor13	27	22.9313	117	88	177.2	72	Rec89	Dor13	Response	Dor13	Male	2018.12.01	0.503	5.79	0.104	1.46	2.15	0.033			83	53	30	1.76	3.6	13.5	10.2	16.9	4.5	70.1	12.7	4.66	73.7		305.5	3.46	0.7	1.32	2.03	4.29	142	102	6.87	4.93	160	45.8	92.9	32.5
Don	Dor13	27	22.9313	117	88	177.2	72	Rec89	Dor13	Response	Dor13	Male	2018.08.01	0.425	6.96	0.111	1.56	2.14	0.026			78	51	27	1.89	6.1	19.4	13	14	4.5	78	12.1	4	76.2		281.2	3.65	1.26	1.32	2.07	4.31	142	102	6.16	4.94	156	46.4	94.1	31.6
Don	Dor13	27	22.9313	117	88	177.2	72	Rec89	Dor13	Response	Dor13	Male	2017.01.01	0.646	2	0.117	1.61	2.04	0.037	1.025	5	81	52	29	1.79	2.5	13.5	14.3	20.2	6	65.4	8.9	4.4	74		275.2	4.17	0.7	1.35	1.87	4.67	142	106	5.75	4.88	157	45.6	93.5	32.1
Don	Dor13	27	22.9313	117	88	177.2	72	Rec89	Dor13	Response	Dor13	Male	2019.06.01	0.571	3.63	0.098	1.58	2.27	0.031	1.02	6	82	56	26	2.12	6.8	27.7	11.6	14.9	5.2	61.1	12.3	3.22	79.6	116.7	297.3	3.79	1.19	1.12	2.16	4.14	143	100	5.5	4.99	158	48.3	96.7	31.6
Don	Dor13	27	22.9313	117	88	177.2	72	Rec89	Dor13	Response	Dor13	Male	2019.03.01	0.374	2.82	0.081	1.51	2.26	0.025			79	55	24	2.36	5.4	20.4	11.3	15.9	4.5	63.9	12.3	4.5	71.7	121.8	241.9	3.67	0.69	1.4	2.05	4.46	141	104	5.35	4.71	150	43.8	93.1	31.9
Don	Dor14	26	22.6586	118	89	174.5	69	Rec104	Dor14	Nonresponse	Dor14	Male	2022.06.07	0.001	1000	0.034	11.291	0.048	0.022	1.005	6	77.9	45.7	32.2	1.42	8.1	27.8	31.9	23	11.6	79.3	29.2	4	70	124.03	301	4.94	1.89	1.09	3.56	4.32	141	108	7.96	5.09	157	45.3	89.1	30.9
Don	Dor14	26	22.6586	118	89	174.5	69	Rec104	Dor14	Nonresponse	Dor14	Male	2022.03.22	0.001	1000	0.002	7.774	0.01	0.011	1.01	6	80.3	47.8	32.5	1.47	7.7	25.1	33.9	21.4	12.1	72.5	30.9	3.9	73	121.55	174	5.47	1.66	1.02	4.28	4.34	140	107	8.12	4.99	158	45.1	90.4	31.6
Don	Dor14	26	22.6586	118	89	174.5	69	Rec107	Dor14	Response	Dor14	Male	2022.06.07	0.001	1000	0.034	11.291	0.048	0.022	1.005	6	77.9	45.7	32.2	1.42	8.1	27.8	31.9	23	11.6	79.3	29.2	4	70	124.03	301	4.94	1.89	1.09	3.56	4.32	141	108	7.96	5.09	157	45.3	89.1	30.9
Don	Dor14	26	22.6586	118	89	174.5	69	Rec107	Dor14	Response	Dor14	Male	2022.03.22	0.001	1000	0.002	7.774	0.01	0.011	1.01	6	80.3	47.8	32.5	1.47	7.7	25.1	33.9	21.4	12.1	72.5	30.9	3.9	73	121.55	174	5.47	1.66	1.02	4.28	4.34	140	107	8.12	4.99	158	45.1	90.4	31.6
Don	Dor14	26	22.6586	118	89	174.5	69	Rec12	Dor14	Response	Dor14	Male	2022.06.07	0.001	1000	0.034	11.291	0.048	0.022	1.005	6	77.9	45.7	32.2	1.42	8.1	27.8	31.9	23	11.6	79.3	29.2	4	70	124.03	301	4.94	1.89	1.09	3.56	4.32	141	108	7.96	5.09	157	45.3	89.1	30.9
Don	Dor14	26	22.6586	118	89	174.5	69	Rec12	Dor14	Response	Dor14	Male	2022.03.22	0.001	1000	0.002	7.774	0.01	0.011	1.01	6	80.3	47.8	32.5	1.47	7.7	25.1	33.9	21.4	12.1	72.5	30.9	3.9	73	121.55	174	5.47	1.66	1.02	4.28	4.34	140	107	8.12	4.99	158	45.1	90.4	31.6
Don	Dor14	26	22.6586	118	89	174.5	69	Rec128	Dor14	Nonresponse	Dor14	Male	2022.06.07	0.001	1000	0.034	11.291	0.048	0.022	1.005	6	77.9	45.7	32.2	1.42	8.1	27.8	31.9	23	11.6	79.3	29.2	4	70	124.03	301	4.94	1.89	1.09	3.56	4.32	141	108	7.96	5.09	157	45.3	89.1	30.9
Don	Dor14	26	22.6586	118	89	174.5	69	Rec128	Dor14	Nonresponse	Dor14	Male	2022.03.22	0.001	1000	0.002	7.774	0.01	0.011	1.01	6	80.3	47.8	32.5	1.47	7.7	25.1	33.9	21.4	12.1	72.5	30.9	3.9	73	121.55	174	5.47	1.66	1.02	4.28	4.34	140	107	8.12	4.99	158	45.1	90.4	31.6
Don	Dor14	26	22.6586	118	89	174.5	69	Rec16	Dor14	Nonresponse	Dor14	Male	2022.06.07	0.001	1000	0.034	11.291	0.048	0.022	1.005	6	77.9	45.7	32.2	1.42	8.1	27.8	31.9	23	11.6	79.3	29.2	4	70	124.03	301	4.94	1.89	1.09	3.56	4.32	141	108	7.96	5.09	157	45.3	89.1	30.9
Don	Dor14	26	22.6586	118	89	174.5	69	Rec16	Dor14	Nonresponse	Dor14	Male	2022.03.22	0.001	1000	0.002	7.774	0.01	0.011	1.01	6	80.3	47.8	32.5	1.47	7.7	25.1	33.9	21.4	12.1	72.5	30.9	3.9	73	121.55	174	5.47	1.66	1.02	4.28	4.34	140	107	8.12	4.99	158	45.1	90.4	31.6
Don	Dor14	26	22.6586	118	89	174.5	69	Rec164	Dor14	Response	Dor14	Male	2022.06.07	0.001	1000	0.034	11.291	0.048	0.022	1.005	6	77.9	45.7	32.2	1.42	8.1	27.8	31.9	23	11.6	79.3	29.2	4	70	124.03	301	4.94	1.89	1.09	3.56	4.32	141	108	7.96	5.09	157	45.3	89.1	30.9
Don	Dor14	26	22.6586	118	89	174.5	69	Rec164	Dor14	Response	Dor14	Male	2022.03.22	0.001	1000	0.002	7.774	0.01	0.011	1.01	6	80.3	47.8	32.5	1.47	7.7	25.1	33.9	21.4	12.1	72.5	30.9	3.9	73	121.55	174	5.47	1.66	1.02	4.28	4.34	140	107	8.12	4.99	158	45.1	90.4	31.6
Don	Dor14	26	22.6586	118	89	174.5	69	Rec195	Dor14	Nonresponse	Dor14	Male	2022.06.07	0.001	1000	0.034	11.291	0.048	0.022	1.005	6	77.9	45.7	32.2	1.42	8.1	27.8	31.9	23	11.6	79.3	29.2	4	70	124.03	301	4.94	1.89	1.09	3.56	4.32	141	108	7.96	5.09	157	45.3	89.1	30.9
Don	Dor14	26	22.6586	118	89	174.5	69	Rec195	Dor14	Nonresponse	Dor14	Male	2022.03.22	0.001	1000	0.002	7.774	0.01	0.011	1.01	6	80.3	47.8	32.5	1.47	7.7	25.1	33.9	21.4	12.1	72.5	30.9	3.9	73	121.55	174	5.47	1.66	1.02	4.28	4.34	140	107	8.12	4.99	158	45.1	90.4	31.6
Don	Dor14	26	22.6586	118	89	174.5	69	Rec2	Dor14	Response	Dor14	Male	2022.06.07	0.001	1000	0.034	11.291	0.048	0.022	1.005	6	77.9	45.7	32.2	1.42	8.1	27.8	31.9	23	11.6	79.3	29.2	4	70	124.03	301	4.94	1.89	1.09	3.56	4.32	141	108	7.96	5.09	157	45.3	89.1	30.9
Don	Dor14	26	22.6586	118	89	174.5	69	Rec2	Dor14	Response	Dor14	Male	2022.03.22	0.001	1000	0.002	7.774	0.01	0.011	1.01	6	80.3	47.8	32.5	1.47	7.7	25.1	33.9	21.4	12.1	72.5	30.9	3.9	73	121.55	174	5.47	1.66	1.02	4.28	4.34	140	107	8.12	4.99	158	45.1	90.4	31.6
Don	Dor14	26	22.6586	118	89	174.5	69	Rec200	Dor14	Nonresponse	Dor14	Male	2022.06.07	0.001	1000	0.034	11.291	0.048	0.022	1.005	6	77.9	45.7	32.2	1.42	8.1	27.8	31.9	23	11.6	79.3	29.2	4	70	124.03	301	4.94	1.89	1.09	3.56	4.32	141	108	7.96	5.09	157	45.3	89.1	30.9
Don	Dor14	26	22.6586	118	89	174.5	69	Rec200	Dor14	Nonresponse	Dor14	Male	2022.03.22	0.001	1000	0.002	7.774	0.01	0.011	1.01	6	80.3	47.8	32.5	1.47	7.7	25.1	33.9	21.4	12.1	72.5	30.9	3.9	73	121.55	174	5.47	1.66	1.02	4.28	4.34	140	107	8.12	4.99	158	45.1	90.4	31.6
Don	Dor14	26	22.6586	118	89	174.5	69	Rec224	Dor14	Response	Dor14	Male	2022.06.07	0.001	1000	0.034	11.291	0.048	0.022	1.005	6	77.9	45.7	32.2	1.42	8.1	27.8	31.9	23	11.6	79.3	29.2	4	70	124.03	301	4.94	1.89	1.09	3.56	4.32	141	108	7.96	5.09	157	45.3	89.1	30.9
Don	Dor14	26	22.6586	118	89	174.5	69	Rec224	Dor14	Response	Dor14	Male	2022.03.22	0.001	1000	0.002	7.774	0.01	0.011	1.01	6	80.3	47.8	32.5	1.47	7.7	25.1	33.9	21.4	12.1	72.5	30.9	3.9	73	121.55	174	5.47	1.66	1.02	4.28	4.34	140	107	8.12	4.99	158	45.1	90.4	31.6
Don	Dor14	26	22.6586	118	89	174.5	69	Rec228	Dor14	Nonresponse	Dor14	Male	2022.06.07	0.001	1000	0.034	11.291	0.048	0.022	1.005	6	77.9	45.7	32.2	1.42	8.1	27.8	31.9	23	11.6	79.3	29.2	4	70	124.03	301	4.94	1.89	1.09	3.56	4.32	141	108	7.96	5.09	157	45.3	89.1	30.9
Don	Dor14	26	22.6586	118	89	174.5	69	Rec228	Dor14	Nonresponse	Dor14	Male	2022.03.22	0.001	1000	0.002	7.774	0.01	0.011	1.01	6	80.3	47.8	32.5	1.47	7.7	25.1	33.9	21.4	12.1	72.5	30.9	3.9	73	121.55	174	5.47	1.66	1.02	4.28	4.34	140	107	8.12	4.99	158	45.1	90.4	31.6
Don	Dor14	26	22.6586	118	89	174.5	69	Rec23	Dor14	Nonresponse	Dor14	Male	2022.06.07	0.001	1000	0.034	11.291	0.048	0.022	1.005	6	77.9	45.7	32.2	1.42	8.1	27.8	31.9	23	11.6	79.3	29.2	4	70	124.03	301	4.94	1.89	1.09	3.56	4.32	141	108	7.96	5.09	157	45.3	89.1	30.9
Don	Dor14	26	22.6586	118	89	174.5	69	Rec23	Dor14	Nonresponse	Dor14	Male	2022.03.22	0.001	1000	0.002	7.774	0.01	0.011	1.01	6	80.3	47.8	32.5	1.47	7.7	25.1	33.9	21.4	12.1	72.5	30.9	3.9	73	121.55	174	5.47	1.66	1.02	4.28	4.34	140	107	8.12	4.99	158	45.1	90.4	31.6
Don	Dor14	26	22.6586	118	89	174.5	69	Rec257	Dor14	Response	Dor14	Male	2022.06.07	0.001	1000	0.034	11.291	0.048	0.022	1.005	6	77.9	45.7	32.2	1.42	8.1	27.8	31.9	23	11.6	79.3	29.2	4	70	124.03	301	4.94	1.89	1.09	3.56	4.32	141	108	7.96	5.09	157	45.3	89.1	30.9
Don	Dor14	26	22.6586	118	89	174.5	69	Rec257	Dor14	Response	Dor14	Male	2022.03.22	0.001	1000	0.002	7.774	0.01	0.011	1.01	6	80.3	47.8	32.5	1.47	7.7	25.1	33.9	21.4	12.1	72.5	30.9	3.9	73	121.55	174	5.47	1.66	1.02	4.28	4.34	140	107	8.12	4.99	158	45.1	90.4	31.6
Don	Dor14	26	22.6586	118	89	174.5	69	Rec27	Dor14	Response	Dor14	Male	2022.06.07	0.001	1000	0.034	11.291	0.048	0.022	1.005	6	77.9	45.7	32.2	1.42	8.1	27.8	31.9	23	11.6	79.3	29.2	4	70	124.03	301	4.94	1.89	1.09	3.56	4.32	141	108	7.96	5.09	157	45.3	89.1	30.9
Don	Dor14	26	22.6586	118	89	174.5	69	Rec27	Dor14	Response	Dor14	Male	2022.03.22	0.001	1000	0.002	7.774	0.01	0.011	1.01	6	80.3	47.8	32.5	1.47	7.7	25.1	33.9	21.4	12.1	72.5	30.9	3.9	73	121.55	174	5.47	1.66	1.02	4.28	4.34	140	107	8.12	4.99	158	45.1	90.4	31.6
Don	Dor14	26	22.6586	118	89	174.5	69	Rec278	Dor14	Response	Dor14	Male	2022.06.07	0.001	1000	0.034	11.291	0.048	0.022	1.005	6	77.9	45.7	32.2	1.42	8.1	27.8	31.9	23	11.6	79.3	29.2	4	70	124.03	301	4.94	1.89	1.09	3.56	4.32	141	108	7.96	5.09	157	45.3	89.1	30.9
Don	Dor14	26	22.6586	118	89	174.5	69	Rec278	Dor14	Response	Dor14	Male	2022.03.22	0.001	1000	0.002	7.774	0.01	0.011	1.01	6	80.3	47.8	32.5	1.47	7.7	25.1	33.9	21.4	12.1	72.5	30.9	3.9	73	121.55	174	5.47	1.66	1.02	4.28	4.34	140	107	8.12	4.99	158	45.1	90.4	31.6
Don	Dor14	26	22.6586	118	89	174.5	69	Rec290	Dor14	Nonresponse	Dor14	Male	2022.06.07	0.001	1000	0.034	11.291	0.048	0.022	1.005	6	77.9	45.7	32.2	1.42	8.1	27.8	31.9	23	11.6	79.3	29.2	4	70	124.03	301	4.94	1.89	1.09	3.56	4.32	141	108	7.96	5.09	157	45.3	89.1	30.9
Don	Dor14	26	22.6586	118	89	174.5	69	Rec290	Dor14	Nonresponse	Dor14	Male	2022.03.22	0.001	1000	0.002	7.774	0.01	0.011	1.01	6	80.3	47.8	32.5	1.47	7.7	25.1	33.9	21.4	12.1	72.5	30.9	3.9	73	121.55	174	5.47	1.66	1.02	4.28	4.34	140	107	8.12	4.99	158	45.1	90.4	31.6
Don	Dor14	26	22.6586	118	89	174.5	69	Rec296	Dor14	Response	Dor14	Male	2022.06.07	0.001	1000	0.034	11.291	0.048	0.022	1.005	6	77.9	45.7	32.2	1.42	8.1	27.8	31.9	23	11.6	79.3	29.2	4	70	124.03	301	4.94	1.89	1.09	3.56	4.32	141	108	7.96	5.09	157	45.3	89.1	30.9
Don	Dor14	26	22.6586	118	89	174.5	69	Rec296	Dor14	Response	Dor14	Male	2022.03.22	0.001	1000	0.002	7.774	0.01	0.011	1.01	6	80.3	47.8	32.5	1.47	7.7	25.1	33.9	21.4	12.1	72.5	30.9	3.9	73	121.55	174	5.47	1.66	1.02	4.28	4.34	140	107	8.12	4.99	158	45.1	90.4	31.6
Don	Dor14	26	22.6586	118	89	174.5	69	Rec298	Dor14	Response	Dor14	Male	2022.06.07	0.001	1000	0.034	11.291	0.048	0.022	1.005	6	77.9	45.7	32.2	1.42	8.1	27.8	31.9	23	11.6	79.3	29.2	4	70	124.03	301	4.94	1.89	1.09	3.56	4.32	141	108	7.96	5.09	157	45.3	89.1	30.9
Don	Dor14	26	22.6586	118	89	174.5	69	Rec298	Dor14	Response	Dor14	Male	2022.03.22	0.001	1000	0.002	7.774	0.01	0.011	1.01	6	80.3	47.8	32.5	1.47	7.7	25.1	33.9	21.4	12.1	72.5	30.9	3.9	73	121.55	174	5.47	1.66	1.02	4.28	4.34	140	107	8.12	4.99	158	45.1	90.4	31.6
Don	Dor14	26	22.6586	118	89	174.5	69	Rec310	Dor14	Nonresponse	Dor14	Male	2022.06.07	0.001	1000	0.034	11.291	0.048	0.022	1.005	6	77.9	45.7	32.2	1.42	8.1	27.8	31.9	23	11.6	79.3	29.2	4	70	124.03	301	4.94	1.89	1.09	3.56	4.32	141	108	7.96	5.09	157	45.3	89.1	30.9
Don	Dor14	26	22.6586	118	89	174.5	69	Rec310	Dor14	Nonresponse	Dor14	Male	2022.03.22	0.001	1000	0.002	7.774	0.01	0.011	1.01	6	80.3	47.8	32.5	1.47	7.7	25.1	33.9	21.4	12.1	72.5	30.9	3.9	73	121.55	174	5.47	1.66	1.02	4.28	4.34	140	107	8.12	4.99	158	45.1	90.4	31.6
Don	Dor14	26	22.6586	118	89	174.5	69	Rec315	Dor14	Response	Dor14	Male	2022.06.07	0.001	1000	0.034	11.291	0.048	0.022	1.005	6	77.9	45.7	32.2	1.42	8.1	27.8	31.9	23	11.6	79.3	29.2	4	70	124.03	301	4.94	1.89	1.09	3.56	4.32	141	108	7.96	5.09	157	45.3	89.1	30.9
Don	Dor14	26	22.6586	118	89	174.5	69	Rec315	Dor14	Response	Dor14	Male	2022.03.22	0.001	1000	0.002	7.774	0.01	0.011	1.01	6	80.3	47.8	32.5	1.47	7.7	25.1	33.9	21.4	12.1	72.5	30.9	3.9	73	121.55	174	5.47	1.66	1.02	4.28	4.34	140	107	8.12	4.99	158	45.1	90.4	31.6
Don	Dor14	26	22.6586	118	89	174.5	69	Rec317	Dor14	Response	Dor14	Male	2022.06.07	0.001	1000	0.034	11.291	0.048	0.022	1.005	6	77.9	45.7	32.2	1.42	8.1	27.8	31.9	23	11.6	79.3	29.2	4	70	124.03	301	4.94	1.89	1.09	3.56	4.32	141	108	7.96	5.09	157	45.3	89.1	30.9
Don	Dor14	26	22.6586	118	89	174.5	69	Rec317	Dor14	Response	Dor14	Male	2022.03.22	0.001	1000	0.002	7.774	0.01	0.011	1.01	6	80.3	47.8	32.5	1.47	7.7	25.1	33.9	21.4	12.1	72.5	30.9	3.9	73	121.55	174	5.47	1.66	1.02	4.28	4.34	140	107	8.12	4.99	158	45.1	90.4	31.6
Don	Dor14	26	22.6586	118	89	174.5	69	Rec321	Dor14	Response	Dor14	Male	2022.06.07	0.001	1000	0.034	11.291	0.048	0.022	1.005	6	77.9	45.7	32.2	1.42	8.1	27.8	31.9	23	11.6	79.3	29.2	4	70	124.03	301	4.94	1.89	1.09	3.56	4.32	141	108	7.96	5.09	157	45.3	89.1	30.9
Don	Dor14	26	22.6586	118	89	174.5	69	Rec321	Dor14	Response	Dor14	Male	2022.03.22	0.001	1000	0.002	7.774	0.01	0.011	1.01	6	80.3	47.8	32.5	1.47	7.7	25.1	33.9	21.4	12.1	72.5	30.9	3.9	73	121.55	174	5.47	1.66	1.02	4.28	4.34	140	107	8.12	4.99	158	45.1	90.4	31.6
Don	Dor14	26	22.6586	118	89	174.5	69	Rec342	Dor14	Nonresponse	Dor14	Male	2022.06.07	0.001	1000	0.034	11.291	0.048	0.022	1.005	6	77.9	45.7	32.2	1.42	8.1	27.8	31.9	23	11.6	79.3	29.2	4	70	124.03	301	4.94	1.89	1.09	3.56	4.32	141	108	7.96	5.09	157	45.3	89.1	30.9
Don	Dor14	26	22.6586	118	89	174.5	69	Rec342	Dor14	Nonresponse	Dor14	Male	2022.03.22	0.001	1000	0.002	7.774	0.01	0.011	1.01	6	80.3	47.8	32.5	1.47	7.7	25.1	33.9	21.4	12.1	72.5	30.9	3.9	73	121.55	174	5.47	1.66	1.02	4.28	4.34	140	107	8.12	4.99	158	45.1	90.4	31.6
Don	Dor14	26	22.6586	118	89	174.5	69	Rec360	Dor14	Response	Dor14	Male	2022.06.07	0.001	1000	0.034	11.291	0.048	0.022	1.005	6	77.9	45.7	32.2	1.42	8.1	27.8	31.9	23	11.6	79.3	29.2	4	70	124.03	301	4.94	1.89	1.09	3.56	4.32	141	108	7.96	5.09	157	45.3	89.1	30.9
Don	Dor14	26	22.6586	118	89	174.5	69	Rec360	Dor14	Response	Dor14	Male	2022.03.22	0.001	1000	0.002	7.774	0.01	0.011	1.01	6	80.3	47.8	32.5	1.47	7.7	25.1	33.9	21.4	12.1	72.5	30.9	3.9	73	121.55	174	5.47	1.66	1.02	4.28	4.34	140	107	8.12	4.99	158	45.1	90.4	31.6
Don	Dor14	26	22.6586	118	89	174.5	69	Rec365	Dor14	Response	Dor14	Male	2022.06.07	0.001	1000	0.034	11.291	0.048	0.022	1.005	6	77.9	45.7	32.2	1.42	8.1	27.8	31.9	23	11.6	79.3	29.2	4	70	124.03	301	4.94	1.89	1.09	3.56	4.32	141	108	7.96	5.09	157	45.3	89.1	30.9
Don	Dor14	26	22.6586	118	89	174.5	69	Rec365	Dor14	Response	Dor14	Male	2022.03.22	0.001	1000	0.002	7.774	0.01	0.011	1.01	6	80.3	47.8	32.5	1.47	7.7	25.1	33.9	21.4	12.1	72.5	30.9	3.9	73	121.55	174	5.47	1.66	1.02	4.28	4.34	140	107	8.12	4.99	158	45.1	90.4	31.6
Don	Dor14	26	22.6586	118	89	174.5	69	Rec367	Dor14	Response	Dor14	Male	2022.06.07	0.001	1000	0.034	11.291	0.048	0.022	1.005	6	77.9	45.7	32.2	1.42	8.1	27.8	31.9	23	11.6	79.3	29.2	4	70	124.03	301	4.94	1.89	1.09	3.56	4.32	141	108	7.96	5.09	157	45.3	89.1	30.9
Don	Dor14	26	22.6586	118	89	174.5	69	Rec367	Dor14	Response	Dor14	Male	2022.03.22	0.001	1000	0.002	7.774	0.01	0.011	1.01	6	80.3	47.8	32.5	1.47	7.7	25.1	33.9	21.4	12.1	72.5	30.9	3.9	73	121.55	174	5.47	1.66	1.02	4.28	4.34	140	107	8.12	4.99	158	45.1	90.4	31.6
Don	Dor14	26	22.6586	118	89	174.5	69	Rec368	Dor14	Response	Dor14	Male	2022.06.07	0.001	1000	0.034	11.291	0.048	0.022	1.005	6	77.9	45.7	32.2	1.42	8.1	27.8	31.9	23	11.6	79.3	29.2	4	70	124.03	301	4.94	1.89	1.09	3.56	4.32	141	108	7.96	5.09	157	45.3	89.1	30.9
Don	Dor14	26	22.6586	118	89	174.5	69	Rec368	Dor14	Response	Dor14	Male	2022.03.22	0.001	1000	0.002	7.774	0.01	0.011	1.01	6	80.3	47.8	32.5	1.47	7.7	25.1	33.9	21.4	12.1	72.5	30.9	3.9	73	121.55	174	5.47	1.66	1.02	4.28	4.34	140	107	8.12	4.99	158	45.1	90.4	31.6
Don	Dor14	26	22.6586	118	89	174.5	69	Rec40	Dor14	Response	Dor14	Male	2022.06.07	0.001	1000	0.034	11.291	0.048	0.022	1.005	6	77.9	45.7	32.2	1.42	8.1	27.8	31.9	23	11.6	79.3	29.2	4	70	124.03	301	4.94	1.89	1.09	3.56	4.32	141	108	7.96	5.09	157	45.3	89.1	30.9
Don	Dor14	26	22.6586	118	89	174.5	69	Rec40	Dor14	Response	Dor14	Male	2022.03.22	0.001	1000	0.002	7.774	0.01	0.011	1.01	6	80.3	47.8	32.5	1.47	7.7	25.1	33.9	21.4	12.1	72.5	30.9	3.9	73	121.55	174	5.47	1.66	1.02	4.28	4.34	140	107	8.12	4.99	158	45.1	90.4	31.6
Don	Dor14	26	22.6586	118	89	174.5	69	Rec42	Dor14	Response	Dor14	Male	2022.06.07	0.001	1000	0.034	11.291	0.048	0.022	1.005	6	77.9	45.7	32.2	1.42	8.1	27.8	31.9	23	11.6	79.3	29.2	4	70	124.03	301	4.94	1.89	1.09	3.56	4.32	141	108	7.96	5.09	157	45.3	89.1	30.9
Don	Dor14	26	22.6586	118	89	174.5	69	Rec42	Dor14	Response	Dor14	Male	2022.03.22	0.001	1000	0.002	7.774	0.01	0.011	1.01	6	80.3	47.8	32.5	1.47	7.7	25.1	33.9	21.4	12.1	72.5	30.9	3.9	73	121.55	174	5.47	1.66	1.02	4.28	4.34	140	107	8.12	4.99	158	45.1	90.4	31.6
Don	Dor14	26	22.6586	118	89	174.5	69	Rec46	Dor14	Response	Dor14	Male	2022.06.07	0.001	1000	0.034	11.291	0.048	0.022	1.005	6	77.9	45.7	32.2	1.42	8.1	27.8	31.9	23	11.6	79.3	29.2	4	70	124.03	301	4.94	1.89	1.09	3.56	4.32	141	108	7.96	5.09	157	45.3	89.1	30.9
Don	Dor14	26	22.6586	118	89	174.5	69	Rec46	Dor14	Response	Dor14	Male	2022.03.22	0.001	1000	0.002	7.774	0.01	0.011	1.01	6	80.3	47.8	32.5	1.47	7.7	25.1	33.9	21.4	12.1	72.5	30.9	3.9	73	121.55	174	5.47	1.66	1.02	4.28	4.34	140	107	8.12	4.99	158	45.1	90.4	31.6
Don	Dor14	26	22.6586	118	89	174.5	69	Rec49	Dor14	Response	Dor14	Male	2022.06.07	0.001	1000	0.034	11.291	0.048	0.022	1.005	6	77.9	45.7	32.2	1.42	8.1	27.8	31.9	23	11.6	79.3	29.2	4	70	124.03	301	4.94	1.89	1.09	3.56	4.32	141	108	7.96	5.09	157	45.3	89.1	30.9
Don	Dor14	26	22.6586	118	89	174.5	69	Rec49	Dor14	Response	Dor14	Male	2022.03.22	0.001	1000	0.002	7.774	0.01	0.011	1.01	6	80.3	47.8	32.5	1.47	7.7	25.1	33.9	21.4	12.1	72.5	30.9	3.9	73	121.55	174	5.47	1.66	1.02	4.28	4.34	140	107	8.12	4.99	158	45.1	90.4	31.6
Don	Dor14	26	22.6586	118	89	174.5	69	Rec57	Dor14	Response	Dor14	Male	2022.06.07	0.001	1000	0.034	11.291	0.048	0.022	1.005	6	77.9	45.7	32.2	1.42	8.1	27.8	31.9	23	11.6	79.3	29.2	4	70	124.03	301	4.94	1.89	1.09	3.56	4.32	141	108	7.96	5.09	157	45.3	89.1	30.9
Don	Dor14	26	22.6586	118	89	174.5	69	Rec57	Dor14	Response	Dor14	Male	2022.03.22	0.001	1000	0.002	7.774	0.01	0.011	1.01	6	80.3	47.8	32.5	1.47	7.7	25.1	33.9	21.4	12.1	72.5	30.9	3.9	73	121.55	174	5.47	1.66	1.02	4.28	4.34	140	107	8.12	4.99	158	45.1	90.4	31.6
Don	Dor14	26	22.6586	118	89	174.5	69	Rec6	Dor14	Response	Dor14	Male	2022.06.07	0.001	1000	0.034	11.291	0.048	0.022	1.005	6	77.9	45.7	32.2	1.42	8.1	27.8	31.9	23	11.6	79.3	29.2	4	70	124.03	301	4.94	1.89	1.09	3.56	4.32	141	108	7.96	5.09	157	45.3	89.1	30.9
Don	Dor14	26	22.6586	118	89	174.5	69	Rec6	Dor14	Response	Dor14	Male	2022.03.22	0.001	1000	0.002	7.774	0.01	0.011	1.01	6	80.3	47.8	32.5	1.47	7.7	25.1	33.9	21.4	12.1	72.5	30.9	3.9	73	121.55	174	5.47	1.66	1.02	4.28	4.34	140	107	8.12	4.99	158	45.1	90.4	31.6
Don	Dor14	26	22.6586	118	89	174.5	69	Rec67	Dor14	Response	Dor14	Male	2022.06.07	0.001	1000	0.034	11.291	0.048	0.022	1.005	6	77.9	45.7	32.2	1.42	8.1	27.8	31.9	23	11.6	79.3	29.2	4	70	124.03	301	4.94	1.89	1.09	3.56	4.32	141	108	7.96	5.09	157	45.3	89.1	30.9
Don	Dor14	26	22.6586	118	89	174.5	69	Rec67	Dor14	Response	Dor14	Male	2022.03.22	0.001	1000	0.002	7.774	0.01	0.011	1.01	6	80.3	47.8	32.5	1.47	7.7	25.1	33.9	21.4	12.1	72.5	30.9	3.9	73	121.55	174	5.47	1.66	1.02	4.28	4.34	140	107	8.12	4.99	158	45.1	90.4	31.6
Don	Dor14	26	22.6586	118	89	174.5	69	Rec84	Dor14	Response	Dor14	Male	2022.06.07	0.001	1000	0.034	11.291	0.048	0.022	1.005	6	77.9	45.7	32.2	1.42	8.1	27.8	31.9	23	11.6	79.3	29.2	4	70	124.03	301	4.94	1.89	1.09	3.56	4.32	141	108	7.96	5.09	157	45.3	89.1	30.9
Don	Dor14	26	22.6586	118	89	174.5	69	Rec84	Dor14	Response	Dor14	Male	2022.03.22	0.001	1000	0.002	7.774	0.01	0.011	1.01	6	80.3	47.8	32.5	1.47	7.7	25.1	33.9	21.4	12.1	72.5	30.9	3.9	73	121.55	174	5.47	1.66	1.02	4.28	4.34	140	107	8.12	4.99	158	45.1	90.4	31.6
Don	Dor14	26	22.6586	118	89	174.5	69	Rec86	Dor14	Nonresponse	Dor14	Male	2022.06.07	0.001	1000	0.034	11.291	0.048	0.022	1.005	6	77.9	45.7	32.2	1.42	8.1	27.8	31.9	23	11.6	79.3	29.2	4	70	124.03	301	4.94	1.89	1.09	3.56	4.32	141	108	7.96	5.09	157	45.3	89.1	30.9
Don	Dor14	26	22.6586	118	89	174.5	69	Rec86	Dor14	Nonresponse	Dor14	Male	2022.03.22	0.001	1000	0.002	7.774	0.01	0.011	1.01	6	80.3	47.8	32.5	1.47	7.7	25.1	33.9	21.4	12.1	72.5	30.9	3.9	73	121.55	174	5.47	1.66	1.02	4.28	4.34	140	107	8.12	4.99	158	45.1	90.4	31.6
Don	Dor14	26	22.6586	118	89	174.5	69	Rec87	Dor14	Response	Dor14	Male	2022.06.07	0.001	1000	0.034	11.291	0.048	0.022	1.005	6	77.9	45.7	32.2	1.42	8.1	27.8	31.9	23	11.6	79.3	29.2	4	70	124.03	301	4.94	1.89	1.09	3.56	4.32	141	108	7.96	5.09	157	45.3	89.1	30.9
Don	Dor14	26	22.6586	118	89	174.5	69	Rec87	Dor14	Response	Dor14	Male	2022.03.22	0.001	1000	0.002	7.774	0.01	0.011	1.01	6	80.3	47.8	32.5	1.47	7.7	25.1	33.9	21.4	12.1	72.5	30.9	3.9	73	121.55	174	5.47	1.66	1.02	4.28	4.34	140	107	8.12	4.99	158	45.1	90.4	31.6
Don	Dor15	27	24.7252	119	83	173	74	Rec10	Dor15	Response	Dor15	Male	2020.03.12	0.407	2	0.084	1.46	2.17	0.013	1.025	5	72.9	47.3	25.6	1.85	1.7	6	16.7	16.6	4.3	106.2	29.1	3.79	83	110.483	517	4.48	1.34	0.87	3.24	5	141	100	8.7	5.21	149	46.4	89.2	28.6
Don	Dor15	27	24.7252	119	83	173	74	Rec129	Dor15	Response	Dor15	Male	2020.03.12	0.407	2	0.084	1.46	2.17	0.013	1.025	5	72.9	47.3	25.6	1.85	1.7	6	16.7	16.6	4.3	106.2	29.1	3.79	83	110.483	517	4.48	1.34	0.87	3.24	5	141	100	8.7	5.21	149	46.4	89.2	28.6
Don	Dor15	27	24.7252	119	83	173	74	Rec152	Dor15	Nonresponse	Dor15	Male	2020.03.12	0.407	2	0.084	1.46	2.17	0.013	1.025	5	72.9	47.3	25.6	1.85	1.7	6	16.7	16.6	4.3	106.2	29.1	3.79	83	110.483	517	4.48	1.34	0.87	3.24	5	141	100	8.7	5.21	149	46.4	89.2	28.6
Don	Dor15	27	24.7252	119	83	173	74	Rec162	Dor15	Response	Dor15	Male	2020.03.12	0.407	2	0.084	1.46	2.17	0.013	1.025	5	72.9	47.3	25.6	1.85	1.7	6	16.7	16.6	4.3	106.2	29.1	3.79	83	110.483	517	4.48	1.34	0.87	3.24	5	141	100	8.7	5.21	149	46.4	89.2	28.6
Don	Dor15	27	24.7252	119	83	173	74	Rec192	Dor15	Response	Dor15	Male	2020.03.12	0.407	2	0.084	1.46	2.17	0.013	1.025	5	72.9	47.3	25.6	1.85	1.7	6	16.7	16.6	4.3	106.2	29.1	3.79	83	110.483	517	4.48	1.34	0.87	3.24	5	141	100	8.7	5.21	149	46.4	89.2	28.6
Don	Dor15	27	24.7252	119	83	173	74	Rec193	Dor15	Response	Dor15	Male	2020.03.12	0.407	2	0.084	1.46	2.17	0.013	1.025	5	72.9	47.3	25.6	1.85	1.7	6	16.7	16.6	4.3	106.2	29.1	3.79	83	110.483	517	4.48	1.34	0.87	3.24	5	141	100	8.7	5.21	149	46.4	89.2	28.6
Don	Dor15	27	24.7252	119	83	173	74	Rec203	Dor15	Response	Dor15	Male	2020.03.12	0.407	2	0.084	1.46	2.17	0.013	1.025	5	72.9	47.3	25.6	1.85	1.7	6	16.7	16.6	4.3	106.2	29.1	3.79	83	110.483	517	4.48	1.34	0.87	3.24	5	141	100	8.7	5.21	149	46.4	89.2	28.6
Don	Dor15	27	24.7252	119	83	173	74	Rec237	Dor15	Response	Dor15	Male	2020.03.12	0.407	2	0.084	1.46	2.17	0.013	1.025	5	72.9	47.3	25.6	1.85	1.7	6	16.7	16.6	4.3	106.2	29.1	3.79	83	110.483	517	4.48	1.34	0.87	3.24	5	141	100	8.7	5.21	149	46.4	89.2	28.6
Don	Dor15	27	24.7252	119	83	173	74	Rec244	Dor15	Nonresponse	Dor15	Male	2020.03.12	0.407	2	0.084	1.46	2.17	0.013	1.025	5	72.9	47.3	25.6	1.85	1.7	6	16.7	16.6	4.3	106.2	29.1	3.79	83	110.483	517	4.48	1.34	0.87	3.24	5	141	100	8.7	5.21	149	46.4	89.2	28.6
Don	Dor15	27	24.7252	119	83	173	74	Rec25	Dor15	Response	Dor15	Male	2020.03.12	0.407	2	0.084	1.46	2.17	0.013	1.025	5	72.9	47.3	25.6	1.85	1.7	6	16.7	16.6	4.3	106.2	29.1	3.79	83	110.483	517	4.48	1.34	0.87	3.24	5	141	100	8.7	5.21	149	46.4	89.2	28.6
Don	Dor15	27	24.7252	119	83	173	74	Rec276	Dor15	Response	Dor15	Male	2020.03.12	0.407	2	0.084	1.46	2.17	0.013	1.025	5	72.9	47.3	25.6	1.85	1.7	6	16.7	16.6	4.3	106.2	29.1	3.79	83	110.483	517	4.48	1.34	0.87	3.24	5	141	100	8.7	5.21	149	46.4	89.2	28.6
Don	Dor15	27	24.7252	119	83	173	74	Rec286	Dor15	Response	Dor15	Male	2020.03.12	0.407	2	0.084	1.46	2.17	0.013	1.025	5	72.9	47.3	25.6	1.85	1.7	6	16.7	16.6	4.3	106.2	29.1	3.79	83	110.483	517	4.48	1.34	0.87	3.24	5	141	100	8.7	5.21	149	46.4	89.2	28.6
Don	Dor15	27	24.7252	119	83	173	74	Rec300	Dor15	Nonresponse	Dor15	Male	2020.03.12	0.407	2	0.084	1.46	2.17	0.013	1.025	5	72.9	47.3	25.6	1.85	1.7	6	16.7	16.6	4.3	106.2	29.1	3.79	83	110.483	517	4.48	1.34	0.87	3.24	5	141	100	8.7	5.21	149	46.4	89.2	28.6
Don	Dor15	27	24.7252	119	83	173	74	Rec309	Dor15	Response	Dor15	Male	2020.03.12	0.407	2	0.084	1.46	2.17	0.013	1.025	5	72.9	47.3	25.6	1.85	1.7	6	16.7	16.6	4.3	106.2	29.1	3.79	83	110.483	517	4.48	1.34	0.87	3.24	5	141	100	8.7	5.21	149	46.4	89.2	28.6
Don	Dor15	27	24.7252	119	83	173	74	Rec327	Dor15	Response	Dor15	Male	2020.03.12	0.407	2	0.084	1.46	2.17	0.013	1.025	5	72.9	47.3	25.6	1.85	1.7	6	16.7	16.6	4.3	106.2	29.1	3.79	83	110.483	517	4.48	1.34	0.87	3.24	5	141	100	8.7	5.21	149	46.4	89.2	28.6
Don	Dor15	27	24.7252	119	83	173	74	Rec350	Dor15	Response	Dor15	Male	2020.03.12	0.407	2	0.084	1.46	2.17	0.013	1.025	5	72.9	47.3	25.6	1.85	1.7	6	16.7	16.6	4.3	106.2	29.1	3.79	83	110.483	517	4.48	1.34	0.87	3.24	5	141	100	8.7	5.21	149	46.4	89.2	28.6
Don	Dor15	27	24.7252	119	83	173	74	Rec358	Dor15	Response	Dor15	Male	2020.03.12	0.407	2	0.084	1.46	2.17	0.013	1.025	5	72.9	47.3	25.6	1.85	1.7	6	16.7	16.6	4.3	106.2	29.1	3.79	83	110.483	517	4.48	1.34	0.87	3.24	5	141	100	8.7	5.21	149	46.4	89.2	28.6
Don	Dor15	27	24.7252	119	83	173	74	Rec364	Dor15	Response	Dor15	Male	2020.03.12	0.407	2	0.084	1.46	2.17	0.013	1.025	5	72.9	47.3	25.6	1.85	1.7	6	16.7	16.6	4.3	106.2	29.1	3.79	83	110.483	517	4.48	1.34	0.87	3.24	5	141	100	8.7	5.21	149	46.4	89.2	28.6
Don	Dor15	27	24.7252	119	83	173	74	Rec66	Dor15	Nonresponse	Dor15	Male	2020.03.12	0.407	2	0.084	1.46	2.17	0.013	1.025	5	72.9	47.3	25.6	1.85	1.7	6	16.7	16.6	4.3	106.2	29.1	3.79	83	110.483	517	4.48	1.34	0.87	3.24	5	141	100	8.7	5.21	149	46.4	89.2	28.6
Don	Dor15	27	24.7252	119	83	173	74	Rec70	Dor15	Response	Dor15	Male	2020.03.12	0.407	2	0.084	1.46	2.17	0.013	1.025	5	72.9	47.3	25.6	1.85	1.7	6	16.7	16.6	4.3	106.2	29.1	3.79	83	110.483	517	4.48	1.34	0.87	3.24	5	141	100	8.7	5.21	149	46.4	89.2	28.6
Don	Dor15	27	24.7252	119	83	173	74	Rec80	Dor15	Response	Dor15	Male	2020.03.12	0.407	2	0.084	1.46	2.17	0.013	1.025	5	72.9	47.3	25.6	1.85	1.7	6	16.7	16.6	4.3	106.2	29.1	3.79	83	110.483	517	4.48	1.34	0.87	3.24	5	141	100	8.7	5.21	149	46.4	89.2	28.6
Don	Dor15	27	24.7252	119	83	173	74	Rec83	Dor15	Response	Dor15	Male	2020.03.12	0.407	2	0.084	1.46	2.17	0.013	1.025	5	72.9	47.3	25.6	1.85	1.7	6	16.7	16.6	4.3	106.2	29.1	3.79	83	110.483	517	4.48	1.34	0.87	3.24	5	141	100	8.7	5.21	149	46.4	89.2	28.6
Don	Dor15	27	24.7252	119	83	173	74	Rec85	Dor15	Response	Dor15	Male	2020.03.12	0.407	2	0.084	1.46	2.17	0.013	1.025	5	72.9	47.3	25.6	1.85	1.7	6	16.7	16.6	4.3	106.2	29.1	3.79	83	110.483	517	4.48	1.34	0.87	3.24	5	141	100	8.7	5.21	149	46.4	89.2	28.6
Don	Dor2	28	19.0451	112	76	173	57	Rec101	Dor2	Response	Dor2	Female	2022.03.22	0.001	12.106	0.002	12.305	0.032	0.007	1.026	6	75.5	43.3	32.2	1.34	6.4	16.9	15.4	17.4	8.3	27.2	21.3	3.4	61	118.78	247	4.02	0.92	1.39	2.21	4.09	140	106	6.42	4.64	135	41.1	88.5	29.1
Don	Dor2	28	19.0451	112	76	173	57	Rec106	Dor2	Response	Dor2	Female	2022.03.22	0.001	12.106	0.002	12.305	0.032	0.007	1.026	6	75.5	43.3	32.2	1.34	6.4	16.9	15.4	17.4	8.3	27.2	21.3	3.4	61	118.78	247	4.02	0.92	1.39	2.21	4.09	140	106	6.42	4.64	135	41.1	88.5	29.1
Don	Dor2	28	19.0451	112	76	173	57	Rec110	Dor2	Response	Dor2	Female	2022.03.22	0.001	12.106	0.002	12.305	0.032	0.007	1.026	6	75.5	43.3	32.2	1.34	6.4	16.9	15.4	17.4	8.3	27.2	21.3	3.4	61	118.78	247	4.02	0.92	1.39	2.21	4.09	140	106	6.42	4.64	135	41.1	88.5	29.1
Don	Dor2	28	19.0451	112	76	173	57	Rec138	Dor2	Nonresponse	Dor2	Female	2022.03.22	0.001	12.106	0.002	12.305	0.032	0.007	1.026	6	75.5	43.3	32.2	1.34	6.4	16.9	15.4	17.4	8.3	27.2	21.3	3.4	61	118.78	247	4.02	0.92	1.39	2.21	4.09	140	106	6.42	4.64	135	41.1	88.5	29.1
Don	Dor2	28	19.0451	112	76	173	57	Rec140	Dor2	Response	Dor2	Female	2022.03.22	0.001	12.106	0.002	12.305	0.032	0.007	1.026	6	75.5	43.3	32.2	1.34	6.4	16.9	15.4	17.4	8.3	27.2	21.3	3.4	61	118.78	247	4.02	0.92	1.39	2.21	4.09	140	106	6.42	4.64	135	41.1	88.5	29.1
Don	Dor2	28	19.0451	112	76	173	57	Rec153	Dor2	Response	Dor2	Female	2022.03.22	0.001	12.106	0.002	12.305	0.032	0.007	1.026	6	75.5	43.3	32.2	1.34	6.4	16.9	15.4	17.4	8.3	27.2	21.3	3.4	61	118.78	247	4.02	0.92	1.39	2.21	4.09	140	106	6.42	4.64	135	41.1	88.5	29.1
Don	Dor2	28	19.0451	112	76	173	57	Rec157	Dor2	Response	Dor2	Female	2022.03.22	0.001	12.106	0.002	12.305	0.032	0.007	1.026	6	75.5	43.3	32.2	1.34	6.4	16.9	15.4	17.4	8.3	27.2	21.3	3.4	61	118.78	247	4.02	0.92	1.39	2.21	4.09	140	106	6.42	4.64	135	41.1	88.5	29.1
Don	Dor2	28	19.0451	112	76	173	57	Rec161	Dor2	Response	Dor2	Female	2022.03.22	0.001	12.106	0.002	12.305	0.032	0.007	1.026	6	75.5	43.3	32.2	1.34	6.4	16.9	15.4	17.4	8.3	27.2	21.3	3.4	61	118.78	247	4.02	0.92	1.39	2.21	4.09	140	106	6.42	4.64	135	41.1	88.5	29.1
Don	Dor2	28	19.0451	112	76	173	57	Rec17	Dor2	Nonresponse	Dor2	Female	2022.03.22	0.001	12.106	0.002	12.305	0.032	0.007	1.026	6	75.5	43.3	32.2	1.34	6.4	16.9	15.4	17.4	8.3	27.2	21.3	3.4	61	118.78	247	4.02	0.92	1.39	2.21	4.09	140	106	6.42	4.64	135	41.1	88.5	29.1
Don	Dor2	28	19.0451	112	76	173	57	Rec174	Dor2	Response	Dor2	Female	2022.03.22	0.001	12.106	0.002	12.305	0.032	0.007	1.026	6	75.5	43.3	32.2	1.34	6.4	16.9	15.4	17.4	8.3	27.2	21.3	3.4	61	118.78	247	4.02	0.92	1.39	2.21	4.09	140	106	6.42	4.64	135	41.1	88.5	29.1
Don	Dor2	28	19.0451	112	76	173	57	Rec19	Dor2	Response	Dor2	Female	2022.03.22	0.001	12.106	0.002	12.305	0.032	0.007	1.026	6	75.5	43.3	32.2	1.34	6.4	16.9	15.4	17.4	8.3	27.2	21.3	3.4	61	118.78	247	4.02	0.92	1.39	2.21	4.09	140	106	6.42	4.64	135	41.1	88.5	29.1
Don	Dor2	28	19.0451	112	76	173	57	Rec191	Dor2	Response	Dor2	Female	2022.03.22	0.001	12.106	0.002	12.305	0.032	0.007	1.026	6	75.5	43.3	32.2	1.34	6.4	16.9	15.4	17.4	8.3	27.2	21.3	3.4	61	118.78	247	4.02	0.92	1.39	2.21	4.09	140	106	6.42	4.64	135	41.1	88.5	29.1
Don	Dor2	28	19.0451	112	76	173	57	Rec204	Dor2	Response	Dor2	Female	2022.03.22	0.001	12.106	0.002	12.305	0.032	0.007	1.026	6	75.5	43.3	32.2	1.34	6.4	16.9	15.4	17.4	8.3	27.2	21.3	3.4	61	118.78	247	4.02	0.92	1.39	2.21	4.09	140	106	6.42	4.64	135	41.1	88.5	29.1
Don	Dor2	28	19.0451	112	76	173	57	Rec21	Dor2	Response	Dor2	Female	2022.03.22	0.001	12.106	0.002	12.305	0.032	0.007	1.026	6	75.5	43.3	32.2	1.34	6.4	16.9	15.4	17.4	8.3	27.2	21.3	3.4	61	118.78	247	4.02	0.92	1.39	2.21	4.09	140	106	6.42	4.64	135	41.1	88.5	29.1
Don	Dor2	28	19.0451	112	76	173	57	Rec216	Dor2	Response	Dor2	Female	2022.03.22	0.001	12.106	0.002	12.305	0.032	0.007	1.026	6	75.5	43.3	32.2	1.34	6.4	16.9	15.4	17.4	8.3	27.2	21.3	3.4	61	118.78	247	4.02	0.92	1.39	2.21	4.09	140	106	6.42	4.64	135	41.1	88.5	29.1
Don	Dor2	28	19.0451	112	76	173	57	Rec221	Dor2	Response	Dor2	Female	2022.03.22	0.001	12.106	0.002	12.305	0.032	0.007	1.026	6	75.5	43.3	32.2	1.34	6.4	16.9	15.4	17.4	8.3	27.2	21.3	3.4	61	118.78	247	4.02	0.92	1.39	2.21	4.09	140	106	6.42	4.64	135	41.1	88.5	29.1
Don	Dor2	28	19.0451	112	76	173	57	Rec230	Dor2	Nonresponse	Dor2	Female	2022.03.22	0.001	12.106	0.002	12.305	0.032	0.007	1.026	6	75.5	43.3	32.2	1.34	6.4	16.9	15.4	17.4	8.3	27.2	21.3	3.4	61	118.78	247	4.02	0.92	1.39	2.21	4.09	140	106	6.42	4.64	135	41.1	88.5	29.1
Don	Dor2	28	19.0451	112	76	173	57	Rec238	Dor2	Response	Dor2	Female	2022.03.22	0.001	12.106	0.002	12.305	0.032	0.007	1.026	6	75.5	43.3	32.2	1.34	6.4	16.9	15.4	17.4	8.3	27.2	21.3	3.4	61	118.78	247	4.02	0.92	1.39	2.21	4.09	140	106	6.42	4.64	135	41.1	88.5	29.1
Don	Dor2	28	19.0451	112	76	173	57	Rec259	Dor2	Nonresponse	Dor2	Female	2022.03.22	0.001	12.106	0.002	12.305	0.032	0.007	1.026	6	75.5	43.3	32.2	1.34	6.4	16.9	15.4	17.4	8.3	27.2	21.3	3.4	61	118.78	247	4.02	0.92	1.39	2.21	4.09	140	106	6.42	4.64	135	41.1	88.5	29.1
Don	Dor2	28	19.0451	112	76	173	57	Rec268	Dor2	Response	Dor2	Female	2022.03.22	0.001	12.106	0.002	12.305	0.032	0.007	1.026	6	75.5	43.3	32.2	1.34	6.4	16.9	15.4	17.4	8.3	27.2	21.3	3.4	61	118.78	247	4.02	0.92	1.39	2.21	4.09	140	106	6.42	4.64	135	41.1	88.5	29.1
Don	Dor2	28	19.0451	112	76	173	57	Rec281	Dor2	Response	Dor2	Female	2022.03.22	0.001	12.106	0.002	12.305	0.032	0.007	1.026	6	75.5	43.3	32.2	1.34	6.4	16.9	15.4	17.4	8.3	27.2	21.3	3.4	61	118.78	247	4.02	0.92	1.39	2.21	4.09	140	106	6.42	4.64	135	41.1	88.5	29.1
Don	Dor2	28	19.0451	112	76	173	57	Rec282	Dor2	Response	Dor2	Female	2022.03.22	0.001	12.106	0.002	12.305	0.032	0.007	1.026	6	75.5	43.3	32.2	1.34	6.4	16.9	15.4	17.4	8.3	27.2	21.3	3.4	61	118.78	247	4.02	0.92	1.39	2.21	4.09	140	106	6.42	4.64	135	41.1	88.5	29.1
Don	Dor2	28	19.0451	112	76	173	57	Rec312	Dor2	Response	Dor2	Female	2022.03.22	0.001	12.106	0.002	12.305	0.032	0.007	1.026	6	75.5	43.3	32.2	1.34	6.4	16.9	15.4	17.4	8.3	27.2	21.3	3.4	61	118.78	247	4.02	0.92	1.39	2.21	4.09	140	106	6.42	4.64	135	41.1	88.5	29.1
Don	Dor2	28	19.0451	112	76	173	57	Rec333	Dor2	Response	Dor2	Female	2022.03.22	0.001	12.106	0.002	12.305	0.032	0.007	1.026	6	75.5	43.3	32.2	1.34	6.4	16.9	15.4	17.4	8.3	27.2	21.3	3.4	61	118.78	247	4.02	0.92	1.39	2.21	4.09	140	106	6.42	4.64	135	41.1	88.5	29.1
Don	Dor2	28	19.0451	112	76	173	57	Rec344	Dor2	Nonresponse	Dor2	Female	2022.03.22	0.001	12.106	0.002	12.305	0.032	0.007	1.026	6	75.5	43.3	32.2	1.34	6.4	16.9	15.4	17.4	8.3	27.2	21.3	3.4	61	118.78	247	4.02	0.92	1.39	2.21	4.09	140	106	6.42	4.64	135	41.1	88.5	29.1
Don	Dor2	28	19.0451	112	76	173	57	Rec35	Dor2	Nonresponse	Dor2	Female	2022.03.22	0.001	12.106	0.002	12.305	0.032	0.007	1.026	6	75.5	43.3	32.2	1.34	6.4	16.9	15.4	17.4	8.3	27.2	21.3	3.4	61	118.78	247	4.02	0.92	1.39	2.21	4.09	140	106	6.42	4.64	135	41.1	88.5	29.1
Don	Dor2	28	19.0451	112	76	173	57	Rec359	Dor2	Response	Dor2	Female	2022.03.22	0.001	12.106	0.002	12.305	0.032	0.007	1.026	6	75.5	43.3	32.2	1.34	6.4	16.9	15.4	17.4	8.3	27.2	21.3	3.4	61	118.78	247	4.02	0.92	1.39	2.21	4.09	140	106	6.42	4.64	135	41.1	88.5	29.1
Don	Dor2	28	19.0451	112	76	173	57	Rec45	Dor2	Response	Dor2	Female	2022.03.22	0.001	12.106	0.002	12.305	0.032	0.007	1.026	6	75.5	43.3	32.2	1.34	6.4	16.9	15.4	17.4	8.3	27.2	21.3	3.4	61	118.78	247	4.02	0.92	1.39	2.21	4.09	140	106	6.42	4.64	135	41.1	88.5	29.1
Don	Dor2	28	19.0451	112	76	173	57	Rec50	Dor2	Response	Dor2	Female	2022.03.22	0.001	12.106	0.002	12.305	0.032	0.007	1.026	6	75.5	43.3	32.2	1.34	6.4	16.9	15.4	17.4	8.3	27.2	21.3	3.4	61	118.78	247	4.02	0.92	1.39	2.21	4.09	140	106	6.42	4.64	135	41.1	88.5	29.1
Don	Dor2	28	19.0451	112	76	173	57	Rec55	Dor2	Response	Dor2	Female	2022.03.22	0.001	12.106	0.002	12.305	0.032	0.007	1.026	6	75.5	43.3	32.2	1.34	6.4	16.9	15.4	17.4	8.3	27.2	21.3	3.4	61	118.78	247	4.02	0.92	1.39	2.21	4.09	140	106	6.42	4.64	135	41.1	88.5	29.1
Don	Dor2	28	19.0451	112	76	173	57	Rec64	Dor2	Response	Dor2	Female	2022.03.22	0.001	12.106	0.002	12.305	0.032	0.007	1.026	6	75.5	43.3	32.2	1.34	6.4	16.9	15.4	17.4	8.3	27.2	21.3	3.4	61	118.78	247	4.02	0.92	1.39	2.21	4.09	140	106	6.42	4.64	135	41.1	88.5	29.1
Don	Dor2	28	19.0451	112	76	173	57	Rec73	Dor2	Response	Dor2	Female	2022.03.22	0.001	12.106	0.002	12.305	0.032	0.007	1.026	6	75.5	43.3	32.2	1.34	6.4	16.9	15.4	17.4	8.3	27.2	21.3	3.4	61	118.78	247	4.02	0.92	1.39	2.21	4.09	140	106	6.42	4.64	135	41.1	88.5	29.1
Don	Dor2	28	19.0451	112	76	173	57	Rec79	Dor2	Response	Dor2	Female	2022.03.22	0.001	12.106	0.002	12.305	0.032	0.007	1.026	6	75.5	43.3	32.2	1.34	6.4	16.9	15.4	17.4	8.3	27.2	21.3	3.4	61	118.78	247	4.02	0.92	1.39	2.21	4.09	140	106	6.42	4.64	135	41.1	88.5	29.1
Don	Dor2	28	19.0451	112	76	173	57	Rec92	Dor2	Response	Dor2	Female	2022.03.22	0.001	12.106	0.002	12.305	0.032	0.007	1.026	6	75.5	43.3	32.2	1.34	6.4	16.9	15.4	17.4	8.3	27.2	21.3	3.4	61	118.78	247	4.02	0.92	1.39	2.21	4.09	140	106	6.42	4.64	135	41.1	88.5	29.1
Don	Dor2	28	19.0451	112	76	173	57	Rec95	Dor2	Response	Dor2	Female	2022.03.22	0.001	12.106	0.002	12.305	0.032	0.007	1.026	6	75.5	43.3	32.2	1.34	6.4	16.9	15.4	17.4	8.3	27.2	21.3	3.4	61	118.78	247	4.02	0.92	1.39	2.21	4.09	140	106	6.42	4.64	135	41.1	88.5	29.1
Don	Dor3	27	19.6243	113	84	163	52	Rec100	Dor3	Response	Dor3	Female	2018.09.26	0.341	4.54	0.109	1.5	2.19	0.055	1.015	6	72	47	25	1.87	2.2	5.2	8.4	15.7	5.9	39.8	9.8	3.11	68.8		261.2	4.15	0.98	1.7	2.15	4.34	145	105	4.82	4.1	124	39.1	95.4	30.2
Don	Dor3	27	19.6243	113	84	163	52	Rec100	Dor3	Response	Dor3	Female	2018.04.28	0.553	2	0.118	1.48	1.95	0.018	1.026	6.5	72	48	24	2.02	2.5	7.5	8.6	15.2	4	41.6	10.5	3.56	72.6		275.1	3.97	0.92	1.62	1.73	4.16	142	103	4.91	4.28	128	39.9	93.9	29.9
Don	Dor3	27	19.6243	113	84	163	52	Rec100	Dor3	Response	Dor3	Female	2018.01.04	0.517	2	0.112	1.54	1.78	0.021	1.025	6	72	47	25	1.88	1.8	4.6	9.9	15	5	39.8	8	5.2	65.3		222.7	3.73	1.11	1.72	1.6	4.66	144	106	5.68	4.24	130	40.9	96.4	30.7
Don	Dor3	27	19.6243	113	84	163	52	Rec100	Dor3	Response	Dor3	Female	2019.09.01	0.678	2	0.084	1.52	2.34	0.027			79	50	29	1.73	2.2	4.8	11.2	16.5	6.5	43	11.6	6	80	86.8	363.1	4.35	1.25	1.6	2.2	4.66	139	96	4.91	4.48	135	41.6	92.9	30.1
Don	Dor3	27	19.6243	113	84	163	52	Rec100	Dor3	Response	Dor3	Female	2019.04.01	0.298	2	0.084	1.54	2.23	0.019	1.015	6	72	49	23	2.17	3	8.8	8	17	5.1	44.9	9.7	4.85	72	98.6	351.3	3.92	0.81	1.77	1.9	4.07	142	103	8.22	4.03	121	37.6	93.3	30
Don	Dor3	27	19.6243	113	84	163	52	Rec100	Dor3	Response	Dor3	Female	2019.01.10	0.393	2	0.089	1.45	2.21	0.027			71	47	23	2.03	2.1	8	8.1	16.7	4.9	41.7	7.7	3.66	72.2		320.2	3.94	1.37	1.37	2.2	4.01	142	104	5.16	4.14	126	39.1	94.5	30.5
Don	Dor3	27	19.6243	113	84	163	52	Rec114	Dor3	Nonresponse	Dor3	Female	2018.09.26	0.341	4.54	0.109	1.5	2.19	0.055	1.015	6	72	47	25	1.87	2.2	5.2	8.4	15.7	5.9	39.8	9.8	3.11	68.8		261.2	4.15	0.98	1.7	2.15	4.34	145	105	4.82	4.1	124	39.1	95.4	30.2
Don	Dor3	27	19.6243	113	84	163	52	Rec114	Dor3	Nonresponse	Dor3	Female	2018.04.28	0.553	2	0.118	1.48	1.95	0.018	1.026	6.5	72	48	24	2.02	2.5	7.5	8.6	15.2	4	41.6	10.5	3.56	72.6		275.1	3.97	0.92	1.62	1.73	4.16	142	103	4.91	4.28	128	39.9	93.9	29.9
Don	Dor3	27	19.6243	113	84	163	52	Rec114	Dor3	Nonresponse	Dor3	Female	2018.01.04	0.517	2	0.112	1.54	1.78	0.021	1.025	6	72	47	25	1.88	1.8	4.6	9.9	15	5	39.8	8	5.2	65.3		222.7	3.73	1.11	1.72	1.6	4.66	144	106	5.68	4.24	130	40.9	96.4	30.7
Don	Dor3	27	19.6243	113	84	163	52	Rec114	Dor3	Nonresponse	Dor3	Female	2019.09.01	0.678	2	0.084	1.52	2.34	0.027			79	50	29	1.73	2.2	4.8	11.2	16.5	6.5	43	11.6	6	80	86.8	363.1	4.35	1.25	1.6	2.2	4.66	139	96	4.91	4.48	135	41.6	92.9	30.1
Don	Dor3	27	19.6243	113	84	163	52	Rec114	Dor3	Nonresponse	Dor3	Female	2019.04.01	0.298	2	0.084	1.54	2.23	0.019	1.015	6	72	49	23	2.17	3	8.8	8	17	5.1	44.9	9.7	4.85	72	98.6	351.3	3.92	0.81	1.77	1.9	4.07	142	103	8.22	4.03	121	37.6	93.3	30
Don	Dor3	27	19.6243	113	84	163	52	Rec114	Dor3	Nonresponse	Dor3	Female	2019.01.10	0.393	2	0.089	1.45	2.21	0.027			71	47	23	2.03	2.1	8	8.1	16.7	4.9	41.7	7.7	3.66	72.2		320.2	3.94	1.37	1.37	2.2	4.01	142	104	5.16	4.14	126	39.1	94.5	30.5
Don	Dor3	27	19.6243	113	84	163	52	Rec124	Dor3	Response	Dor3	Female	2018.09.26	0.341	4.54	0.109	1.5	2.19	0.055	1.015	6	72	47	25	1.87	2.2	5.2	8.4	15.7	5.9	39.8	9.8	3.11	68.8		261.2	4.15	0.98	1.7	2.15	4.34	145	105	4.82	4.1	124	39.1	95.4	30.2
Don	Dor3	27	19.6243	113	84	163	52	Rec124	Dor3	Response	Dor3	Female	2018.04.28	0.553	2	0.118	1.48	1.95	0.018	1.026	6.5	72	48	24	2.02	2.5	7.5	8.6	15.2	4	41.6	10.5	3.56	72.6		275.1	3.97	0.92	1.62	1.73	4.16	142	103	4.91	4.28	128	39.9	93.9	29.9
Don	Dor3	27	19.6243	113	84	163	52	Rec124	Dor3	Response	Dor3	Female	2018.01.04	0.517	2	0.112	1.54	1.78	0.021	1.025	6	72	47	25	1.88	1.8	4.6	9.9	15	5	39.8	8	5.2	65.3		222.7	3.73	1.11	1.72	1.6	4.66	144	106	5.68	4.24	130	40.9	96.4	30.7
Don	Dor3	27	19.6243	113	84	163	52	Rec124	Dor3	Response	Dor3	Female	2019.09.01	0.678	2	0.084	1.52	2.34	0.027			79	50	29	1.73	2.2	4.8	11.2	16.5	6.5	43	11.6	6	80	86.8	363.1	4.35	1.25	1.6	2.2	4.66	139	96	4.91	4.48	135	41.6	92.9	30.1
Don	Dor3	27	19.6243	113	84	163	52	Rec124	Dor3	Response	Dor3	Female	2019.04.01	0.298	2	0.084	1.54	2.23	0.019	1.015	6	72	49	23	2.17	3	8.8	8	17	5.1	44.9	9.7	4.85	72	98.6	351.3	3.92	0.81	1.77	1.9	4.07	142	103	8.22	4.03	121	37.6	93.3	30
Don	Dor3	27	19.6243	113	84	163	52	Rec124	Dor3	Response	Dor3	Female	2019.01.10	0.393	2	0.089	1.45	2.21	0.027			71	47	23	2.03	2.1	8	8.1	16.7	4.9	41.7	7.7	3.66	72.2		320.2	3.94	1.37	1.37	2.2	4.01	142	104	5.16	4.14	126	39.1	94.5	30.5
Don	Dor3	27	19.6243	113	84	163	52	Rec125	Dor3	Response	Dor3	Female	2018.09.26	0.341	4.54	0.109	1.5	2.19	0.055	1.015	6	72	47	25	1.87	2.2	5.2	8.4	15.7	5.9	39.8	9.8	3.11	68.8		261.2	4.15	0.98	1.7	2.15	4.34	145	105	4.82	4.1	124	39.1	95.4	30.2
Don	Dor3	27	19.6243	113	84	163	52	Rec125	Dor3	Response	Dor3	Female	2018.04.28	0.553	2	0.118	1.48	1.95	0.018	1.026	6.5	72	48	24	2.02	2.5	7.5	8.6	15.2	4	41.6	10.5	3.56	72.6		275.1	3.97	0.92	1.62	1.73	4.16	142	103	4.91	4.28	128	39.9	93.9	29.9
Don	Dor3	27	19.6243	113	84	163	52	Rec125	Dor3	Response	Dor3	Female	2018.01.04	0.517	2	0.112	1.54	1.78	0.021	1.025	6	72	47	25	1.88	1.8	4.6	9.9	15	5	39.8	8	5.2	65.3		222.7	3.73	1.11	1.72	1.6	4.66	144	106	5.68	4.24	130	40.9	96.4	30.7
Don	Dor3	27	19.6243	113	84	163	52	Rec125	Dor3	Response	Dor3	Female	2019.09.01	0.678	2	0.084	1.52	2.34	0.027			79	50	29	1.73	2.2	4.8	11.2	16.5	6.5	43	11.6	6	80	86.8	363.1	4.35	1.25	1.6	2.2	4.66	139	96	4.91	4.48	135	41.6	92.9	30.1
Don	Dor3	27	19.6243	113	84	163	52	Rec125	Dor3	Response	Dor3	Female	2019.04.01	0.298	2	0.084	1.54	2.23	0.019	1.015	6	72	49	23	2.17	3	8.8	8	17	5.1	44.9	9.7	4.85	72	98.6	351.3	3.92	0.81	1.77	1.9	4.07	142	103	8.22	4.03	121	37.6	93.3	30
Don	Dor3	27	19.6243	113	84	163	52	Rec125	Dor3	Response	Dor3	Female	2019.01.10	0.393	2	0.089	1.45	2.21	0.027			71	47	23	2.03	2.1	8	8.1	16.7	4.9	41.7	7.7	3.66	72.2		320.2	3.94	1.37	1.37	2.2	4.01	142	104	5.16	4.14	126	39.1	94.5	30.5
Don	Dor3	27	19.6243	113	84	163	52	Rec135	Dor3	Response	Dor3	Female	2018.09.26	0.341	4.54	0.109	1.5	2.19	0.055	1.015	6	72	47	25	1.87	2.2	5.2	8.4	15.7	5.9	39.8	9.8	3.11	68.8		261.2	4.15	0.98	1.7	2.15	4.34	145	105	4.82	4.1	124	39.1	95.4	30.2
Don	Dor3	27	19.6243	113	84	163	52	Rec135	Dor3	Response	Dor3	Female	2018.04.28	0.553	2	0.118	1.48	1.95	0.018	1.026	6.5	72	48	24	2.02	2.5	7.5	8.6	15.2	4	41.6	10.5	3.56	72.6		275.1	3.97	0.92	1.62	1.73	4.16	142	103	4.91	4.28	128	39.9	93.9	29.9
Don	Dor3	27	19.6243	113	84	163	52	Rec135	Dor3	Response	Dor3	Female	2018.01.04	0.517	2	0.112	1.54	1.78	0.021	1.025	6	72	47	25	1.88	1.8	4.6	9.9	15	5	39.8	8	5.2	65.3		222.7	3.73	1.11	1.72	1.6	4.66	144	106	5.68	4.24	130	40.9	96.4	30.7
Don	Dor3	27	19.6243	113	84	163	52	Rec135	Dor3	Response	Dor3	Female	2019.09.01	0.678	2	0.084	1.52	2.34	0.027			79	50	29	1.73	2.2	4.8	11.2	16.5	6.5	43	11.6	6	80	86.8	363.1	4.35	1.25	1.6	2.2	4.66	139	96	4.91	4.48	135	41.6	92.9	30.1
Don	Dor3	27	19.6243	113	84	163	52	Rec135	Dor3	Response	Dor3	Female	2019.04.01	0.298	2	0.084	1.54	2.23	0.019	1.015	6	72	49	23	2.17	3	8.8	8	17	5.1	44.9	9.7	4.85	72	98.6	351.3	3.92	0.81	1.77	1.9	4.07	142	103	8.22	4.03	121	37.6	93.3	30
Don	Dor3	27	19.6243	113	84	163	52	Rec135	Dor3	Response	Dor3	Female	2019.01.10	0.393	2	0.089	1.45	2.21	0.027			71	47	23	2.03	2.1	8	8.1	16.7	4.9	41.7	7.7	3.66	72.2		320.2	3.94	1.37	1.37	2.2	4.01	142	104	5.16	4.14	126	39.1	94.5	30.5
Don	Dor3	27	19.6243	113	84	163	52	Rec137	Dor3	Response	Dor3	Female	2018.09.26	0.341	4.54	0.109	1.5	2.19	0.055	1.015	6	72	47	25	1.87	2.2	5.2	8.4	15.7	5.9	39.8	9.8	3.11	68.8		261.2	4.15	0.98	1.7	2.15	4.34	145	105	4.82	4.1	124	39.1	95.4	30.2
Don	Dor3	27	19.6243	113	84	163	52	Rec137	Dor3	Response	Dor3	Female	2018.04.28	0.553	2	0.118	1.48	1.95	0.018	1.026	6.5	72	48	24	2.02	2.5	7.5	8.6	15.2	4	41.6	10.5	3.56	72.6		275.1	3.97	0.92	1.62	1.73	4.16	142	103	4.91	4.28	128	39.9	93.9	29.9
Don	Dor3	27	19.6243	113	84	163	52	Rec137	Dor3	Response	Dor3	Female	2018.01.04	0.517	2	0.112	1.54	1.78	0.021	1.025	6	72	47	25	1.88	1.8	4.6	9.9	15	5	39.8	8	5.2	65.3		222.7	3.73	1.11	1.72	1.6	4.66	144	106	5.68	4.24	130	40.9	96.4	30.7
Don	Dor3	27	19.6243	113	84	163	52	Rec137	Dor3	Response	Dor3	Female	2019.09.01	0.678	2	0.084	1.52	2.34	0.027			79	50	29	1.73	2.2	4.8	11.2	16.5	6.5	43	11.6	6	80	86.8	363.1	4.35	1.25	1.6	2.2	4.66	139	96	4.91	4.48	135	41.6	92.9	30.1
Don	Dor3	27	19.6243	113	84	163	52	Rec137	Dor3	Response	Dor3	Female	2019.04.01	0.298	2	0.084	1.54	2.23	0.019	1.015	6	72	49	23	2.17	3	8.8	8	17	5.1	44.9	9.7	4.85	72	98.6	351.3	3.92	0.81	1.77	1.9	4.07	142	103	8.22	4.03	121	37.6	93.3	30
Don	Dor3	27	19.6243	113	84	163	52	Rec137	Dor3	Response	Dor3	Female	2019.01.10	0.393	2	0.089	1.45	2.21	0.027			71	47	23	2.03	2.1	8	8.1	16.7	4.9	41.7	7.7	3.66	72.2		320.2	3.94	1.37	1.37	2.2	4.01	142	104	5.16	4.14	126	39.1	94.5	30.5
Don	Dor3	27	19.6243	113	84	163	52	Rec150	Dor3	Nonresponse	Dor3	Female	2018.09.26	0.341	4.54	0.109	1.5	2.19	0.055	1.015	6	72	47	25	1.87	2.2	5.2	8.4	15.7	5.9	39.8	9.8	3.11	68.8		261.2	4.15	0.98	1.7	2.15	4.34	145	105	4.82	4.1	124	39.1	95.4	30.2
Don	Dor3	27	19.6243	113	84	163	52	Rec150	Dor3	Nonresponse	Dor3	Female	2018.04.28	0.553	2	0.118	1.48	1.95	0.018	1.026	6.5	72	48	24	2.02	2.5	7.5	8.6	15.2	4	41.6	10.5	3.56	72.6		275.1	3.97	0.92	1.62	1.73	4.16	142	103	4.91	4.28	128	39.9	93.9	29.9
Don	Dor3	27	19.6243	113	84	163	52	Rec150	Dor3	Nonresponse	Dor3	Female	2018.01.04	0.517	2	0.112	1.54	1.78	0.021	1.025	6	72	47	25	1.88	1.8	4.6	9.9	15	5	39.8	8	5.2	65.3		222.7	3.73	1.11	1.72	1.6	4.66	144	106	5.68	4.24	130	40.9	96.4	30.7
Don	Dor3	27	19.6243	113	84	163	52	Rec150	Dor3	Nonresponse	Dor3	Female	2019.09.01	0.678	2	0.084	1.52	2.34	0.027			79	50	29	1.73	2.2	4.8	11.2	16.5	6.5	43	11.6	6	80	86.8	363.1	4.35	1.25	1.6	2.2	4.66	139	96	4.91	4.48	135	41.6	92.9	30.1
Don	Dor3	27	19.6243	113	84	163	52	Rec150	Dor3	Nonresponse	Dor3	Female	2019.04.01	0.298	2	0.084	1.54	2.23	0.019	1.015	6	72	49	23	2.17	3	8.8	8	17	5.1	44.9	9.7	4.85	72	98.6	351.3	3.92	0.81	1.77	1.9	4.07	142	103	8.22	4.03	121	37.6	93.3	30
Don	Dor3	27	19.6243	113	84	163	52	Rec150	Dor3	Nonresponse	Dor3	Female	2019.01.10	0.393	2	0.089	1.45	2.21	0.027			71	47	23	2.03	2.1	8	8.1	16.7	4.9	41.7	7.7	3.66	72.2		320.2	3.94	1.37	1.37	2.2	4.01	142	104	5.16	4.14	126	39.1	94.5	30.5
Don	Dor3	27	19.6243	113	84	163	52	Rec201	Dor3	Response	Dor3	Female	2018.09.26	0.341	4.54	0.109	1.5	2.19	0.055	1.015	6	72	47	25	1.87	2.2	5.2	8.4	15.7	5.9	39.8	9.8	3.11	68.8		261.2	4.15	0.98	1.7	2.15	4.34	145	105	4.82	4.1	124	39.1	95.4	30.2
Don	Dor3	27	19.6243	113	84	163	52	Rec201	Dor3	Response	Dor3	Female	2018.04.28	0.553	2	0.118	1.48	1.95	0.018	1.026	6.5	72	48	24	2.02	2.5	7.5	8.6	15.2	4	41.6	10.5	3.56	72.6		275.1	3.97	0.92	1.62	1.73	4.16	142	103	4.91	4.28	128	39.9	93.9	29.9
Don	Dor3	27	19.6243	113	84	163	52	Rec201	Dor3	Response	Dor3	Female	2018.01.04	0.517	2	0.112	1.54	1.78	0.021	1.025	6	72	47	25	1.88	1.8	4.6	9.9	15	5	39.8	8	5.2	65.3		222.7	3.73	1.11	1.72	1.6	4.66	144	106	5.68	4.24	130	40.9	96.4	30.7
Don	Dor3	27	19.6243	113	84	163	52	Rec201	Dor3	Response	Dor3	Female	2019.09.01	0.678	2	0.084	1.52	2.34	0.027			79	50	29	1.73	2.2	4.8	11.2	16.5	6.5	43	11.6	6	80	86.8	363.1	4.35	1.25	1.6	2.2	4.66	139	96	4.91	4.48	135	41.6	92.9	30.1
Don	Dor3	27	19.6243	113	84	163	52	Rec201	Dor3	Response	Dor3	Female	2019.04.01	0.298	2	0.084	1.54	2.23	0.019	1.015	6	72	49	23	2.17	3	8.8	8	17	5.1	44.9	9.7	4.85	72	98.6	351.3	3.92	0.81	1.77	1.9	4.07	142	103	8.22	4.03	121	37.6	93.3	30
Don	Dor3	27	19.6243	113	84	163	52	Rec201	Dor3	Response	Dor3	Female	2019.01.10	0.393	2	0.089	1.45	2.21	0.027			71	47	23	2.03	2.1	8	8.1	16.7	4.9	41.7	7.7	3.66	72.2		320.2	3.94	1.37	1.37	2.2	4.01	142	104	5.16	4.14	126	39.1	94.5	30.5
Don	Dor3	27	19.6243	113	84	163	52	Rec217	Dor3	Nonresponse	Dor3	Female	2018.09.26	0.341	4.54	0.109	1.5	2.19	0.055	1.015	6	72	47	25	1.87	2.2	5.2	8.4	15.7	5.9	39.8	9.8	3.11	68.8		261.2	4.15	0.98	1.7	2.15	4.34	145	105	4.82	4.1	124	39.1	95.4	30.2
Don	Dor3	27	19.6243	113	84	163	52	Rec217	Dor3	Nonresponse	Dor3	Female	2018.04.28	0.553	2	0.118	1.48	1.95	0.018	1.026	6.5	72	48	24	2.02	2.5	7.5	8.6	15.2	4	41.6	10.5	3.56	72.6		275.1	3.97	0.92	1.62	1.73	4.16	142	103	4.91	4.28	128	39.9	93.9	29.9
Don	Dor3	27	19.6243	113	84	163	52	Rec217	Dor3	Nonresponse	Dor3	Female	2018.01.04	0.517	2	0.112	1.54	1.78	0.021	1.025	6	72	47	25	1.88	1.8	4.6	9.9	15	5	39.8	8	5.2	65.3		222.7	3.73	1.11	1.72	1.6	4.66	144	106	5.68	4.24	130	40.9	96.4	30.7
Don	Dor3	27	19.6243	113	84	163	52	Rec217	Dor3	Nonresponse	Dor3	Female	2019.09.01	0.678	2	0.084	1.52	2.34	0.027			79	50	29	1.73	2.2	4.8	11.2	16.5	6.5	43	11.6	6	80	86.8	363.1	4.35	1.25	1.6	2.2	4.66	139	96	4.91	4.48	135	41.6	92.9	30.1
Don	Dor3	27	19.6243	113	84	163	52	Rec217	Dor3	Nonresponse	Dor3	Female	2019.04.01	0.298	2	0.084	1.54	2.23	0.019	1.015	6	72	49	23	2.17	3	8.8	8	17	5.1	44.9	9.7	4.85	72	98.6	351.3	3.92	0.81	1.77	1.9	4.07	142	103	8.22	4.03	121	37.6	93.3	30
Don	Dor3	27	19.6243	113	84	163	52	Rec217	Dor3	Nonresponse	Dor3	Female	2019.01.10	0.393	2	0.089	1.45	2.21	0.027			71	47	23	2.03	2.1	8	8.1	16.7	4.9	41.7	7.7	3.66	72.2		320.2	3.94	1.37	1.37	2.2	4.01	142	104	5.16	4.14	126	39.1	94.5	30.5
Don	Dor3	27	19.6243	113	84	163	52	Rec219	Dor3	Response	Dor3	Female	2018.09.26	0.341	4.54	0.109	1.5	2.19	0.055	1.015	6	72	47	25	1.87	2.2	5.2	8.4	15.7	5.9	39.8	9.8	3.11	68.8		261.2	4.15	0.98	1.7	2.15	4.34	145	105	4.82	4.1	124	39.1	95.4	30.2
Don	Dor3	27	19.6243	113	84	163	52	Rec219	Dor3	Response	Dor3	Female	2018.04.28	0.553	2	0.118	1.48	1.95	0.018	1.026	6.5	72	48	24	2.02	2.5	7.5	8.6	15.2	4	41.6	10.5	3.56	72.6		275.1	3.97	0.92	1.62	1.73	4.16	142	103	4.91	4.28	128	39.9	93.9	29.9
Don	Dor3	27	19.6243	113	84	163	52	Rec219	Dor3	Response	Dor3	Female	2018.01.04	0.517	2	0.112	1.54	1.78	0.021	1.025	6	72	47	25	1.88	1.8	4.6	9.9	15	5	39.8	8	5.2	65.3		222.7	3.73	1.11	1.72	1.6	4.66	144	106	5.68	4.24	130	40.9	96.4	30.7
Don	Dor3	27	19.6243	113	84	163	52	Rec219	Dor3	Response	Dor3	Female	2019.09.01	0.678	2	0.084	1.52	2.34	0.027			79	50	29	1.73	2.2	4.8	11.2	16.5	6.5	43	11.6	6	80	86.8	363.1	4.35	1.25	1.6	2.2	4.66	139	96	4.91	4.48	135	41.6	92.9	30.1
Don	Dor3	27	19.6243	113	84	163	52	Rec219	Dor3	Response	Dor3	Female	2019.04.01	0.298	2	0.084	1.54	2.23	0.019	1.015	6	72	49	23	2.17	3	8.8	8	17	5.1	44.9	9.7	4.85	72	98.6	351.3	3.92	0.81	1.77	1.9	4.07	142	103	8.22	4.03	121	37.6	93.3	30
Don	Dor3	27	19.6243	113	84	163	52	Rec219	Dor3	Response	Dor3	Female	2019.01.10	0.393	2	0.089	1.45	2.21	0.027			71	47	23	2.03	2.1	8	8.1	16.7	4.9	41.7	7.7	3.66	72.2		320.2	3.94	1.37	1.37	2.2	4.01	142	104	5.16	4.14	126	39.1	94.5	30.5
Don	Dor3	27	19.6243	113	84	163	52	Rec246	Dor3	Response	Dor3	Female	2018.09.26	0.341	4.54	0.109	1.5	2.19	0.055	1.015	6	72	47	25	1.87	2.2	5.2	8.4	15.7	5.9	39.8	9.8	3.11	68.8		261.2	4.15	0.98	1.7	2.15	4.34	145	105	4.82	4.1	124	39.1	95.4	30.2
Don	Dor3	27	19.6243	113	84	163	52	Rec246	Dor3	Response	Dor3	Female	2018.04.28	0.553	2	0.118	1.48	1.95	0.018	1.026	6.5	72	48	24	2.02	2.5	7.5	8.6	15.2	4	41.6	10.5	3.56	72.6		275.1	3.97	0.92	1.62	1.73	4.16	142	103	4.91	4.28	128	39.9	93.9	29.9
Don	Dor3	27	19.6243	113	84	163	52	Rec246	Dor3	Response	Dor3	Female	2018.01.04	0.517	2	0.112	1.54	1.78	0.021	1.025	6	72	47	25	1.88	1.8	4.6	9.9	15	5	39.8	8	5.2	65.3		222.7	3.73	1.11	1.72	1.6	4.66	144	106	5.68	4.24	130	40.9	96.4	30.7
Don	Dor3	27	19.6243	113	84	163	52	Rec246	Dor3	Response	Dor3	Female	2019.09.01	0.678	2	0.084	1.52	2.34	0.027			79	50	29	1.73	2.2	4.8	11.2	16.5	6.5	43	11.6	6	80	86.8	363.1	4.35	1.25	1.6	2.2	4.66	139	96	4.91	4.48	135	41.6	92.9	30.1
Don	Dor3	27	19.6243	113	84	163	52	Rec246	Dor3	Response	Dor3	Female	2019.04.01	0.298	2	0.084	1.54	2.23	0.019	1.015	6	72	49	23	2.17	3	8.8	8	17	5.1	44.9	9.7	4.85	72	98.6	351.3	3.92	0.81	1.77	1.9	4.07	142	103	8.22	4.03	121	37.6	93.3	30
Don	Dor3	27	19.6243	113	84	163	52	Rec246	Dor3	Response	Dor3	Female	2019.01.10	0.393	2	0.089	1.45	2.21	0.027			71	47	23	2.03	2.1	8	8.1	16.7	4.9	41.7	7.7	3.66	72.2		320.2	3.94	1.37	1.37	2.2	4.01	142	104	5.16	4.14	126	39.1	94.5	30.5
Don	Dor3	27	19.6243	113	84	163	52	Rec264	Dor3	Response	Dor3	Female	2018.09.26	0.341	4.54	0.109	1.5	2.19	0.055	1.015	6	72	47	25	1.87	2.2	5.2	8.4	15.7	5.9	39.8	9.8	3.11	68.8		261.2	4.15	0.98	1.7	2.15	4.34	145	105	4.82	4.1	124	39.1	95.4	30.2
Don	Dor3	27	19.6243	113	84	163	52	Rec264	Dor3	Response	Dor3	Female	2018.04.28	0.553	2	0.118	1.48	1.95	0.018	1.026	6.5	72	48	24	2.02	2.5	7.5	8.6	15.2	4	41.6	10.5	3.56	72.6		275.1	3.97	0.92	1.62	1.73	4.16	142	103	4.91	4.28	128	39.9	93.9	29.9
Don	Dor3	27	19.6243	113	84	163	52	Rec264	Dor3	Response	Dor3	Female	2018.01.04	0.517	2	0.112	1.54	1.78	0.021	1.025	6	72	47	25	1.88	1.8	4.6	9.9	15	5	39.8	8	5.2	65.3		222.7	3.73	1.11	1.72	1.6	4.66	144	106	5.68	4.24	130	40.9	96.4	30.7
Don	Dor3	27	19.6243	113	84	163	52	Rec264	Dor3	Response	Dor3	Female	2019.09.01	0.678	2	0.084	1.52	2.34	0.027			79	50	29	1.73	2.2	4.8	11.2	16.5	6.5	43	11.6	6	80	86.8	363.1	4.35	1.25	1.6	2.2	4.66	139	96	4.91	4.48	135	41.6	92.9	30.1
Don	Dor3	27	19.6243	113	84	163	52	Rec264	Dor3	Response	Dor3	Female	2019.04.01	0.298	2	0.084	1.54	2.23	0.019	1.015	6	72	49	23	2.17	3	8.8	8	17	5.1	44.9	9.7	4.85	72	98.6	351.3	3.92	0.81	1.77	1.9	4.07	142	103	8.22	4.03	121	37.6	93.3	30
Don	Dor3	27	19.6243	113	84	163	52	Rec264	Dor3	Response	Dor3	Female	2019.01.10	0.393	2	0.089	1.45	2.21	0.027			71	47	23	2.03	2.1	8	8.1	16.7	4.9	41.7	7.7	3.66	72.2		320.2	3.94	1.37	1.37	2.2	4.01	142	104	5.16	4.14	126	39.1	94.5	30.5
Don	Dor3	27	19.6243	113	84	163	52	Rec288	Dor3	Response	Dor3	Female	2018.09.26	0.341	4.54	0.109	1.5	2.19	0.055	1.015	6	72	47	25	1.87	2.2	5.2	8.4	15.7	5.9	39.8	9.8	3.11	68.8		261.2	4.15	0.98	1.7	2.15	4.34	145	105	4.82	4.1	124	39.1	95.4	30.2
Don	Dor3	27	19.6243	113	84	163	52	Rec288	Dor3	Response	Dor3	Female	2018.04.28	0.553	2	0.118	1.48	1.95	0.018	1.026	6.5	72	48	24	2.02	2.5	7.5	8.6	15.2	4	41.6	10.5	3.56	72.6		275.1	3.97	0.92	1.62	1.73	4.16	142	103	4.91	4.28	128	39.9	93.9	29.9
Don	Dor3	27	19.6243	113	84	163	52	Rec288	Dor3	Response	Dor3	Female	2018.01.04	0.517	2	0.112	1.54	1.78	0.021	1.025	6	72	47	25	1.88	1.8	4.6	9.9	15	5	39.8	8	5.2	65.3		222.7	3.73	1.11	1.72	1.6	4.66	144	106	5.68	4.24	130	40.9	96.4	30.7
Don	Dor3	27	19.6243	113	84	163	52	Rec288	Dor3	Response	Dor3	Female	2019.09.01	0.678	2	0.084	1.52	2.34	0.027			79	50	29	1.73	2.2	4.8	11.2	16.5	6.5	43	11.6	6	80	86.8	363.1	4.35	1.25	1.6	2.2	4.66	139	96	4.91	4.48	135	41.6	92.9	30.1
Don	Dor3	27	19.6243	113	84	163	52	Rec288	Dor3	Response	Dor3	Female	2019.04.01	0.298	2	0.084	1.54	2.23	0.019	1.015	6	72	49	23	2.17	3	8.8	8	17	5.1	44.9	9.7	4.85	72	98.6	351.3	3.92	0.81	1.77	1.9	4.07	142	103	8.22	4.03	121	37.6	93.3	30
Don	Dor3	27	19.6243	113	84	163	52	Rec288	Dor3	Response	Dor3	Female	2019.01.10	0.393	2	0.089	1.45	2.21	0.027			71	47	23	2.03	2.1	8	8.1	16.7	4.9	41.7	7.7	3.66	72.2		320.2	3.94	1.37	1.37	2.2	4.01	142	104	5.16	4.14	126	39.1	94.5	30.5
Don	Dor3	27	19.6243	113	84	163	52	Rec346	Dor3	Response	Dor3	Female	2018.09.26	0.341	4.54	0.109	1.5	2.19	0.055	1.015	6	72	47	25	1.87	2.2	5.2	8.4	15.7	5.9	39.8	9.8	3.11	68.8		261.2	4.15	0.98	1.7	2.15	4.34	145	105	4.82	4.1	124	39.1	95.4	30.2
Don	Dor3	27	19.6243	113	84	163	52	Rec346	Dor3	Response	Dor3	Female	2018.04.28	0.553	2	0.118	1.48	1.95	0.018	1.026	6.5	72	48	24	2.02	2.5	7.5	8.6	15.2	4	41.6	10.5	3.56	72.6		275.1	3.97	0.92	1.62	1.73	4.16	142	103	4.91	4.28	128	39.9	93.9	29.9
Don	Dor3	27	19.6243	113	84	163	52	Rec346	Dor3	Response	Dor3	Female	2018.01.04	0.517	2	0.112	1.54	1.78	0.021	1.025	6	72	47	25	1.88	1.8	4.6	9.9	15	5	39.8	8	5.2	65.3		222.7	3.73	1.11	1.72	1.6	4.66	144	106	5.68	4.24	130	40.9	96.4	30.7
Don	Dor3	27	19.6243	113	84	163	52	Rec346	Dor3	Response	Dor3	Female	2019.09.01	0.678	2	0.084	1.52	2.34	0.027			79	50	29	1.73	2.2	4.8	11.2	16.5	6.5	43	11.6	6	80	86.8	363.1	4.35	1.25	1.6	2.2	4.66	139	96	4.91	4.48	135	41.6	92.9	30.1
Don	Dor3	27	19.6243	113	84	163	52	Rec346	Dor3	Response	Dor3	Female	2019.04.01	0.298	2	0.084	1.54	2.23	0.019	1.015	6	72	49	23	2.17	3	8.8	8	17	5.1	44.9	9.7	4.85	72	98.6	351.3	3.92	0.81	1.77	1.9	4.07	142	103	8.22	4.03	121	37.6	93.3	30
Don	Dor3	27	19.6243	113	84	163	52	Rec346	Dor3	Response	Dor3	Female	2019.01.10	0.393	2	0.089	1.45	2.21	0.027			71	47	23	2.03	2.1	8	8.1	16.7	4.9	41.7	7.7	3.66	72.2		320.2	3.94	1.37	1.37	2.2	4.01	142	104	5.16	4.14	126	39.1	94.5	30.5
Don	Dor3	27	19.6243	113	84	163	52	Rec61	Dor3	Response	Dor3	Female	2018.09.26	0.341	4.54	0.109	1.5	2.19	0.055	1.015	6	72	47	25	1.87	2.2	5.2	8.4	15.7	5.9	39.8	9.8	3.11	68.8		261.2	4.15	0.98	1.7	2.15	4.34	145	105	4.82	4.1	124	39.1	95.4	30.2
Don	Dor3	27	19.6243	113	84	163	52	Rec61	Dor3	Response	Dor3	Female	2018.04.28	0.553	2	0.118	1.48	1.95	0.018	1.026	6.5	72	48	24	2.02	2.5	7.5	8.6	15.2	4	41.6	10.5	3.56	72.6		275.1	3.97	0.92	1.62	1.73	4.16	142	103	4.91	4.28	128	39.9	93.9	29.9
Don	Dor3	27	19.6243	113	84	163	52	Rec61	Dor3	Response	Dor3	Female	2018.01.04	0.517	2	0.112	1.54	1.78	0.021	1.025	6	72	47	25	1.88	1.8	4.6	9.9	15	5	39.8	8	5.2	65.3		222.7	3.73	1.11	1.72	1.6	4.66	144	106	5.68	4.24	130	40.9	96.4	30.7
Don	Dor3	27	19.6243	113	84	163	52	Rec61	Dor3	Response	Dor3	Female	2019.09.01	0.678	2	0.084	1.52	2.34	0.027			79	50	29	1.73	2.2	4.8	11.2	16.5	6.5	43	11.6	6	80	86.8	363.1	4.35	1.25	1.6	2.2	4.66	139	96	4.91	4.48	135	41.6	92.9	30.1
Don	Dor3	27	19.6243	113	84	163	52	Rec61	Dor3	Response	Dor3	Female	2019.04.01	0.298	2	0.084	1.54	2.23	0.019	1.015	6	72	49	23	2.17	3	8.8	8	17	5.1	44.9	9.7	4.85	72	98.6	351.3	3.92	0.81	1.77	1.9	4.07	142	103	8.22	4.03	121	37.6	93.3	30
Don	Dor3	27	19.6243	113	84	163	52	Rec61	Dor3	Response	Dor3	Female	2019.01.10	0.393	2	0.089	1.45	2.21	0.027			71	47	23	2.03	2.1	8	8.1	16.7	4.9	41.7	7.7	3.66	72.2		320.2	3.94	1.37	1.37	2.2	4.01	142	104	5.16	4.14	126	39.1	94.5	30.5
Don	Dor3	27	19.6243	113	84	163	52	Rec94	Dor3	Nonresponse	Dor3	Female	2018.09.26	0.341	4.54	0.109	1.5	2.19	0.055	1.015	6	72	47	25	1.87	2.2	5.2	8.4	15.7	5.9	39.8	9.8	3.11	68.8		261.2	4.15	0.98	1.7	2.15	4.34	145	105	4.82	4.1	124	39.1	95.4	30.2
Don	Dor3	27	19.6243	113	84	163	52	Rec94	Dor3	Nonresponse	Dor3	Female	2018.04.28	0.553	2	0.118	1.48	1.95	0.018	1.026	6.5	72	48	24	2.02	2.5	7.5	8.6	15.2	4	41.6	10.5	3.56	72.6		275.1	3.97	0.92	1.62	1.73	4.16	142	103	4.91	4.28	128	39.9	93.9	29.9
Don	Dor3	27	19.6243	113	84	163	52	Rec94	Dor3	Nonresponse	Dor3	Female	2018.01.04	0.517	2	0.112	1.54	1.78	0.021	1.025	6	72	47	25	1.88	1.8	4.6	9.9	15	5	39.8	8	5.2	65.3		222.7	3.73	1.11	1.72	1.6	4.66	144	106	5.68	4.24	130	40.9	96.4	30.7
Don	Dor3	27	19.6243	113	84	163	52	Rec94	Dor3	Nonresponse	Dor3	Female	2019.09.01	0.678	2	0.084	1.52	2.34	0.027			79	50	29	1.73	2.2	4.8	11.2	16.5	6.5	43	11.6	6	80	86.8	363.1	4.35	1.25	1.6	2.2	4.66	139	96	4.91	4.48	135	41.6	92.9	30.1
Don	Dor3	27	19.6243	113	84	163	52	Rec94	Dor3	Nonresponse	Dor3	Female	2019.04.01	0.298	2	0.084	1.54	2.23	0.019	1.015	6	72	49	23	2.17	3	8.8	8	17	5.1	44.9	9.7	4.85	72	98.6	351.3	3.92	0.81	1.77	1.9	4.07	142	103	8.22	4.03	121	37.6	93.3	30
Don	Dor3	27	19.6243	113	84	163	52	Rec94	Dor3	Nonresponse	Dor3	Female	2019.01.10	0.393	2	0.089	1.45	2.21	0.027			71	47	23	2.03	2.1	8	8.1	16.7	4.9	41.7	7.7	3.66	72.2		320.2	3.94	1.37	1.37	2.2	4.01	142	104	5.16	4.14	126	39.1	94.5	30.5
Don	Dor4	29	23.7654	113	77	180	77	Rec1	Dor4	Response	Dor4	Male	2022.06.07	0.001	8.932	0.041	10.777	0.012	0.023	1.03	5	80.2	47.3	32.9	1.44	5.7	18	23.6	14.8	7.7	54.5	13.3	5.3	75	145.48	361	4.75	1.01	1.12	3.32	4.43	140	107	5.95	4.89	151	44.3	90.7	30.8
Don	Dor4	29	23.7654	113	77	180	77	Rec103	Dor4	Nonresponse	Dor4	Male	2022.06.07	0.001	8.932	0.041	10.777	0.012	0.023	1.03	5	80.2	47.3	32.9	1.44	5.7	18	23.6	14.8	7.7	54.5	13.3	5.3	75	145.48	361	4.75	1.01	1.12	3.32	4.43	140	107	5.95	4.89	151	44.3	90.7	30.8
Don	Dor4	29	23.7654	113	77	180	77	Rec105	Dor4	Response	Dor4	Male	2022.06.07	0.001	8.932	0.041	10.777	0.012	0.023	1.03	5	80.2	47.3	32.9	1.44	5.7	18	23.6	14.8	7.7	54.5	13.3	5.3	75	145.48	361	4.75	1.01	1.12	3.32	4.43	140	107	5.95	4.89	151	44.3	90.7	30.8
Don	Dor4	29	23.7654	113	77	180	77	Rec118	Dor4	Response	Dor4	Male	2022.06.07	0.001	8.932	0.041	10.777	0.012	0.023	1.03	5	80.2	47.3	32.9	1.44	5.7	18	23.6	14.8	7.7	54.5	13.3	5.3	75	145.48	361	4.75	1.01	1.12	3.32	4.43	140	107	5.95	4.89	151	44.3	90.7	30.8
Don	Dor4	29	23.7654	113	77	180	77	Rec127	Dor4	Response	Dor4	Male	2022.06.07	0.001	8.932	0.041	10.777	0.012	0.023	1.03	5	80.2	47.3	32.9	1.44	5.7	18	23.6	14.8	7.7	54.5	13.3	5.3	75	145.48	361	4.75	1.01	1.12	3.32	4.43	140	107	5.95	4.89	151	44.3	90.7	30.8
Don	Dor4	29	23.7654	113	77	180	77	Rec130	Dor4	Response	Dor4	Male	2022.06.07	0.001	8.932	0.041	10.777	0.012	0.023	1.03	5	80.2	47.3	32.9	1.44	5.7	18	23.6	14.8	7.7	54.5	13.3	5.3	75	145.48	361	4.75	1.01	1.12	3.32	4.43	140	107	5.95	4.89	151	44.3	90.7	30.8
Don	Dor4	29	23.7654	113	77	180	77	Rec136	Dor4	Response	Dor4	Male	2022.06.07	0.001	8.932	0.041	10.777	0.012	0.023	1.03	5	80.2	47.3	32.9	1.44	5.7	18	23.6	14.8	7.7	54.5	13.3	5.3	75	145.48	361	4.75	1.01	1.12	3.32	4.43	140	107	5.95	4.89	151	44.3	90.7	30.8
Don	Dor4	29	23.7654	113	77	180	77	Rec142	Dor4	Response	Dor4	Male	2022.06.07	0.001	8.932	0.041	10.777	0.012	0.023	1.03	5	80.2	47.3	32.9	1.44	5.7	18	23.6	14.8	7.7	54.5	13.3	5.3	75	145.48	361	4.75	1.01	1.12	3.32	4.43	140	107	5.95	4.89	151	44.3	90.7	30.8
Don	Dor4	29	23.7654	113	77	180	77	Rec151	Dor4	Response	Dor4	Male	2022.06.07	0.001	8.932	0.041	10.777	0.012	0.023	1.03	5	80.2	47.3	32.9	1.44	5.7	18	23.6	14.8	7.7	54.5	13.3	5.3	75	145.48	361	4.75	1.01	1.12	3.32	4.43	140	107	5.95	4.89	151	44.3	90.7	30.8
Don	Dor4	29	23.7654	113	77	180	77	Rec159	Dor4	Response	Dor4	Male	2022.06.07	0.001	8.932	0.041	10.777	0.012	0.023	1.03	5	80.2	47.3	32.9	1.44	5.7	18	23.6	14.8	7.7	54.5	13.3	5.3	75	145.48	361	4.75	1.01	1.12	3.32	4.43	140	107	5.95	4.89	151	44.3	90.7	30.8
Don	Dor4	29	23.7654	113	77	180	77	Rec18	Dor4	Response	Dor4	Male	2022.06.07	0.001	8.932	0.041	10.777	0.012	0.023	1.03	5	80.2	47.3	32.9	1.44	5.7	18	23.6	14.8	7.7	54.5	13.3	5.3	75	145.48	361	4.75	1.01	1.12	3.32	4.43	140	107	5.95	4.89	151	44.3	90.7	30.8
Don	Dor4	29	23.7654	113	77	180	77	Rec184	Dor4	Response	Dor4	Male	2022.06.07	0.001	8.932	0.041	10.777	0.012	0.023	1.03	5	80.2	47.3	32.9	1.44	5.7	18	23.6	14.8	7.7	54.5	13.3	5.3	75	145.48	361	4.75	1.01	1.12	3.32	4.43	140	107	5.95	4.89	151	44.3	90.7	30.8
Don	Dor4	29	23.7654	113	77	180	77	Rec194	Dor4	Response	Dor4	Male	2022.06.07	0.001	8.932	0.041	10.777	0.012	0.023	1.03	5	80.2	47.3	32.9	1.44	5.7	18	23.6	14.8	7.7	54.5	13.3	5.3	75	145.48	361	4.75	1.01	1.12	3.32	4.43	140	107	5.95	4.89	151	44.3	90.7	30.8
Don	Dor4	29	23.7654	113	77	180	77	Rec202	Dor4	Response	Dor4	Male	2022.06.07	0.001	8.932	0.041	10.777	0.012	0.023	1.03	5	80.2	47.3	32.9	1.44	5.7	18	23.6	14.8	7.7	54.5	13.3	5.3	75	145.48	361	4.75	1.01	1.12	3.32	4.43	140	107	5.95	4.89	151	44.3	90.7	30.8
Don	Dor4	29	23.7654	113	77	180	77	Rec209	Dor4	Response	Dor4	Male	2022.06.07	0.001	8.932	0.041	10.777	0.012	0.023	1.03	5	80.2	47.3	32.9	1.44	5.7	18	23.6	14.8	7.7	54.5	13.3	5.3	75	145.48	361	4.75	1.01	1.12	3.32	4.43	140	107	5.95	4.89	151	44.3	90.7	30.8
Don	Dor4	29	23.7654	113	77	180	77	Rec218	Dor4	Nonresponse	Dor4	Male	2022.06.07	0.001	8.932	0.041	10.777	0.012	0.023	1.03	5	80.2	47.3	32.9	1.44	5.7	18	23.6	14.8	7.7	54.5	13.3	5.3	75	145.48	361	4.75	1.01	1.12	3.32	4.43	140	107	5.95	4.89	151	44.3	90.7	30.8
Don	Dor4	29	23.7654	113	77	180	77	Rec225	Dor4	Response	Dor4	Male	2022.06.07	0.001	8.932	0.041	10.777	0.012	0.023	1.03	5	80.2	47.3	32.9	1.44	5.7	18	23.6	14.8	7.7	54.5	13.3	5.3	75	145.48	361	4.75	1.01	1.12	3.32	4.43	140	107	5.95	4.89	151	44.3	90.7	30.8
Don	Dor4	29	23.7654	113	77	180	77	Rec229	Dor4	Nonresponse	Dor4	Male	2022.06.07	0.001	8.932	0.041	10.777	0.012	0.023	1.03	5	80.2	47.3	32.9	1.44	5.7	18	23.6	14.8	7.7	54.5	13.3	5.3	75	145.48	361	4.75	1.01	1.12	3.32	4.43	140	107	5.95	4.89	151	44.3	90.7	30.8
Don	Dor4	29	23.7654	113	77	180	77	Rec231	Dor4	Response	Dor4	Male	2022.06.07	0.001	8.932	0.041	10.777	0.012	0.023	1.03	5	80.2	47.3	32.9	1.44	5.7	18	23.6	14.8	7.7	54.5	13.3	5.3	75	145.48	361	4.75	1.01	1.12	3.32	4.43	140	107	5.95	4.89	151	44.3	90.7	30.8
Don	Dor4	29	23.7654	113	77	180	77	Rec236	Dor4	Response	Dor4	Male	2022.06.07	0.001	8.932	0.041	10.777	0.012	0.023	1.03	5	80.2	47.3	32.9	1.44	5.7	18	23.6	14.8	7.7	54.5	13.3	5.3	75	145.48	361	4.75	1.01	1.12	3.32	4.43	140	107	5.95	4.89	151	44.3	90.7	30.8
Don	Dor4	29	23.7654	113	77	180	77	Rec245	Dor4	Response	Dor4	Male	2022.06.07	0.001	8.932	0.041	10.777	0.012	0.023	1.03	5	80.2	47.3	32.9	1.44	5.7	18	23.6	14.8	7.7	54.5	13.3	5.3	75	145.48	361	4.75	1.01	1.12	3.32	4.43	140	107	5.95	4.89	151	44.3	90.7	30.8
Don	Dor4	29	23.7654	113	77	180	77	Rec250	Dor4	Response	Dor4	Male	2022.06.07	0.001	8.932	0.041	10.777	0.012	0.023	1.03	5	80.2	47.3	32.9	1.44	5.7	18	23.6	14.8	7.7	54.5	13.3	5.3	75	145.48	361	4.75	1.01	1.12	3.32	4.43	140	107	5.95	4.89	151	44.3	90.7	30.8
Don	Dor4	29	23.7654	113	77	180	77	Rec251	Dor4	Response	Dor4	Male	2022.06.07	0.001	8.932	0.041	10.777	0.012	0.023	1.03	5	80.2	47.3	32.9	1.44	5.7	18	23.6	14.8	7.7	54.5	13.3	5.3	75	145.48	361	4.75	1.01	1.12	3.32	4.43	140	107	5.95	4.89	151	44.3	90.7	30.8
Don	Dor4	29	23.7654	113	77	180	77	Rec256	Dor4	Response	Dor4	Male	2022.06.07	0.001	8.932	0.041	10.777	0.012	0.023	1.03	5	80.2	47.3	32.9	1.44	5.7	18	23.6	14.8	7.7	54.5	13.3	5.3	75	145.48	361	4.75	1.01	1.12	3.32	4.43	140	107	5.95	4.89	151	44.3	90.7	30.8
Don	Dor4	29	23.7654	113	77	180	77	Rec26	Dor4	Response	Dor4	Male	2022.06.07	0.001	8.932	0.041	10.777	0.012	0.023	1.03	5	80.2	47.3	32.9	1.44	5.7	18	23.6	14.8	7.7	54.5	13.3	5.3	75	145.48	361	4.75	1.01	1.12	3.32	4.43	140	107	5.95	4.89	151	44.3	90.7	30.8
Don	Dor4	29	23.7654	113	77	180	77	Rec265	Dor4	Response	Dor4	Male	2022.06.07	0.001	8.932	0.041	10.777	0.012	0.023	1.03	5	80.2	47.3	32.9	1.44	5.7	18	23.6	14.8	7.7	54.5	13.3	5.3	75	145.48	361	4.75	1.01	1.12	3.32	4.43	140	107	5.95	4.89	151	44.3	90.7	30.8
Don	Dor4	29	23.7654	113	77	180	77	Rec269	Dor4	Nonresponse	Dor4	Male	2022.06.07	0.001	8.932	0.041	10.777	0.012	0.023	1.03	5	80.2	47.3	32.9	1.44	5.7	18	23.6	14.8	7.7	54.5	13.3	5.3	75	145.48	361	4.75	1.01	1.12	3.32	4.43	140	107	5.95	4.89	151	44.3	90.7	30.8
Don	Dor4	29	23.7654	113	77	180	77	Rec275	Dor4	Response	Dor4	Male	2022.06.07	0.001	8.932	0.041	10.777	0.012	0.023	1.03	5	80.2	47.3	32.9	1.44	5.7	18	23.6	14.8	7.7	54.5	13.3	5.3	75	145.48	361	4.75	1.01	1.12	3.32	4.43	140	107	5.95	4.89	151	44.3	90.7	30.8
Don	Dor4	29	23.7654	113	77	180	77	Rec277	Dor4	Response	Dor4	Male	2022.06.07	0.001	8.932	0.041	10.777	0.012	0.023	1.03	5	80.2	47.3	32.9	1.44	5.7	18	23.6	14.8	7.7	54.5	13.3	5.3	75	145.48	361	4.75	1.01	1.12	3.32	4.43	140	107	5.95	4.89	151	44.3	90.7	30.8
Don	Dor4	29	23.7654	113	77	180	77	Rec304	Dor4	Response	Dor4	Male	2022.06.07	0.001	8.932	0.041	10.777	0.012	0.023	1.03	5	80.2	47.3	32.9	1.44	5.7	18	23.6	14.8	7.7	54.5	13.3	5.3	75	145.48	361	4.75	1.01	1.12	3.32	4.43	140	107	5.95	4.89	151	44.3	90.7	30.8
Don	Dor4	29	23.7654	113	77	180	77	Rec336	Dor4	Response	Dor4	Male	2022.06.07	0.001	8.932	0.041	10.777	0.012	0.023	1.03	5	80.2	47.3	32.9	1.44	5.7	18	23.6	14.8	7.7	54.5	13.3	5.3	75	145.48	361	4.75	1.01	1.12	3.32	4.43	140	107	5.95	4.89	151	44.3	90.7	30.8
Don	Dor4	29	23.7654	113	77	180	77	Rec340	Dor4	Response	Dor4	Male	2022.06.07	0.001	8.932	0.041	10.777	0.012	0.023	1.03	5	80.2	47.3	32.9	1.44	5.7	18	23.6	14.8	7.7	54.5	13.3	5.3	75	145.48	361	4.75	1.01	1.12	3.32	4.43	140	107	5.95	4.89	151	44.3	90.7	30.8
Don	Dor4	29	23.7654	113	77	180	77	Rec349	Dor4	Nonresponse	Dor4	Male	2022.06.07	0.001	8.932	0.041	10.777	0.012	0.023	1.03	5	80.2	47.3	32.9	1.44	5.7	18	23.6	14.8	7.7	54.5	13.3	5.3	75	145.48	361	4.75	1.01	1.12	3.32	4.43	140	107	5.95	4.89	151	44.3	90.7	30.8
Don	Dor4	29	23.7654	113	77	180	77	Rec357	Dor4	Response	Dor4	Male	2022.06.07	0.001	8.932	0.041	10.777	0.012	0.023	1.03	5	80.2	47.3	32.9	1.44	5.7	18	23.6	14.8	7.7	54.5	13.3	5.3	75	145.48	361	4.75	1.01	1.12	3.32	4.43	140	107	5.95	4.89	151	44.3	90.7	30.8
Don	Dor4	29	23.7654	113	77	180	77	Rec362	Dor4	Nonresponse	Dor4	Male	2022.06.07	0.001	8.932	0.041	10.777	0.012	0.023	1.03	5	80.2	47.3	32.9	1.44	5.7	18	23.6	14.8	7.7	54.5	13.3	5.3	75	145.48	361	4.75	1.01	1.12	3.32	4.43	140	107	5.95	4.89	151	44.3	90.7	30.8
Don	Dor4	29	23.7654	113	77	180	77	Rec370	Dor4	Nonresponse	Dor4	Male	2022.06.07	0.001	8.932	0.041	10.777	0.012	0.023	1.03	5	80.2	47.3	32.9	1.44	5.7	18	23.6	14.8	7.7	54.5	13.3	5.3	75	145.48	361	4.75	1.01	1.12	3.32	4.43	140	107	5.95	4.89	151	44.3	90.7	30.8
Don	Dor4	29	23.7654	113	77	180	77	Rec63	Dor4	Response	Dor4	Male	2022.06.07	0.001	8.932	0.041	10.777	0.012	0.023	1.03	5	80.2	47.3	32.9	1.44	5.7	18	23.6	14.8	7.7	54.5	13.3	5.3	75	145.48	361	4.75	1.01	1.12	3.32	4.43	140	107	5.95	4.89	151	44.3	90.7	30.8
Don	Dor4	29	23.7654	113	77	180	77	Rec77	Dor4	Nonresponse	Dor4	Male	2022.06.07	0.001	8.932	0.041	10.777	0.012	0.023	1.03	5	80.2	47.3	32.9	1.44	5.7	18	23.6	14.8	7.7	54.5	13.3	5.3	75	145.48	361	4.75	1.01	1.12	3.32	4.43	140	107	5.95	4.89	151	44.3	90.7	30.8
Don	Dor5	26	19.433	114	78	162	51	Rec117	Dor5	Response	Dor5	Female	2022.03.22	0.001	917.237	0.02	56.726	11.244	0.039	1.007	6.5	76.8	43.2	33.6	1.29	5.9	13.8	26.7	22.3	13.2	71.9	16.8	3.5	61	120.27	255	3.69	0.73	1.26	2.04	4.14	144	107	5.35	4.42	138	41.7	94.3	31.2
Don	Dor5	26	19.433	114	78	162	51	Rec141	Dor5	Response	Dor5	Female	2022.03.22	0.001	917.237	0.02	56.726	11.244	0.039	1.007	6.5	76.8	43.2	33.6	1.29	5.9	13.8	26.7	22.3	13.2	71.9	16.8	3.5	61	120.27	255	3.69	0.73	1.26	2.04	4.14	144	107	5.35	4.42	138	41.7	94.3	31.2
Don	Dor5	26	19.433	114	78	162	51	Rec197	Dor5	Nonresponse	Dor5	Female	2022.03.22	0.001	917.237	0.02	56.726	11.244	0.039	1.007	6.5	76.8	43.2	33.6	1.29	5.9	13.8	26.7	22.3	13.2	71.9	16.8	3.5	61	120.27	255	3.69	0.73	1.26	2.04	4.14	144	107	5.35	4.42	138	41.7	94.3	31.2
Don	Dor5	26	19.433	114	78	162	51	Rec198	Dor5	Response	Dor5	Female	2022.03.22	0.001	917.237	0.02	56.726	11.244	0.039	1.007	6.5	76.8	43.2	33.6	1.29	5.9	13.8	26.7	22.3	13.2	71.9	16.8	3.5	61	120.27	255	3.69	0.73	1.26	2.04	4.14	144	107	5.35	4.42	138	41.7	94.3	31.2
Don	Dor5	26	19.433	114	78	162	51	Rec199	Dor5	Response	Dor5	Female	2022.03.22	0.001	917.237	0.02	56.726	11.244	0.039	1.007	6.5	76.8	43.2	33.6	1.29	5.9	13.8	26.7	22.3	13.2	71.9	16.8	3.5	61	120.27	255	3.69	0.73	1.26	2.04	4.14	144	107	5.35	4.42	138	41.7	94.3	31.2
Don	Dor5	26	19.433	114	78	162	51	Rec295	Dor5	Nonresponse	Dor5	Female	2022.03.22	0.001	917.237	0.02	56.726	11.244	0.039	1.007	6.5	76.8	43.2	33.6	1.29	5.9	13.8	26.7	22.3	13.2	71.9	16.8	3.5	61	120.27	255	3.69	0.73	1.26	2.04	4.14	144	107	5.35	4.42	138	41.7	94.3	31.2
Don	Dor5	26	19.433	114	78	162	51	Rec30	Dor5	Response	Dor5	Female	2022.03.22	0.001	917.237	0.02	56.726	11.244	0.039	1.007	6.5	76.8	43.2	33.6	1.29	5.9	13.8	26.7	22.3	13.2	71.9	16.8	3.5	61	120.27	255	3.69	0.73	1.26	2.04	4.14	144	107	5.35	4.42	138	41.7	94.3	31.2
Don	Dor5	26	19.433	114	78	162	51	Rec31	Dor5	Response	Dor5	Female	2022.03.22	0.001	917.237	0.02	56.726	11.244	0.039	1.007	6.5	76.8	43.2	33.6	1.29	5.9	13.8	26.7	22.3	13.2	71.9	16.8	3.5	61	120.27	255	3.69	0.73	1.26	2.04	4.14	144	107	5.35	4.42	138	41.7	94.3	31.2
Don	Dor5	26	19.433	114	78	162	51	Rec323	Dor5	Nonresponse	Dor5	Female	2022.03.22	0.001	917.237	0.02	56.726	11.244	0.039	1.007	6.5	76.8	43.2	33.6	1.29	5.9	13.8	26.7	22.3	13.2	71.9	16.8	3.5	61	120.27	255	3.69	0.73	1.26	2.04	4.14	144	107	5.35	4.42	138	41.7	94.3	31.2
Don	Dor5	26	19.433	114	78	162	51	Rec54	Dor5	Response	Dor5	Female	2022.03.22	0.001	917.237	0.02	56.726	11.244	0.039	1.007	6.5	76.8	43.2	33.6	1.29	5.9	13.8	26.7	22.3	13.2	71.9	16.8	3.5	61	120.27	255	3.69	0.73	1.26	2.04	4.14	144	107	5.35	4.42	138	41.7	94.3	31.2
Don	Dor5	26	19.433	114	78	162	51	Rec60	Dor5	Response	Dor5	Female	2022.03.22	0.001	917.237	0.02	56.726	11.244	0.039	1.007	6.5	76.8	43.2	33.6	1.29	5.9	13.8	26.7	22.3	13.2	71.9	16.8	3.5	61	120.27	255	3.69	0.73	1.26	2.04	4.14	144	107	5.35	4.42	138	41.7	94.3	31.2
Don	Dor5	26	19.433	114	78	162	51	Rec96	Dor5	Nonresponse	Dor5	Female	2022.03.22	0.001	917.237	0.02	56.726	11.244	0.039	1.007	6.5	76.8	43.2	33.6	1.29	5.9	13.8	26.7	22.3	13.2	71.9	16.8	3.5	61	120.27	255	3.69	0.73	1.26	2.04	4.14	144	107	5.35	4.42	138	41.7	94.3	31.2
Don	Dor6	29	19.7055	115	79	164	53	Rec14	Dor6	Nonresponse	Dor6	Female	2020.08.01	0.001	1000	0.005	5.933	0.027	0.013	1.005	6	79.4	48.3	31.1	1.55	4.8	17.4	19.8	17.8	8.5	47.1	11.5	2.94	65	11.237	254	4.8	0.75	1.49	3.89	4.47	140	102	5.69	4.11	121	38	92.4	29.5
Don	Dor6	29	19.7055	115	79	164	53	Rec186	Dor6	Response	Dor6	Female	2020.08.01	0.001	1000	0.005	5.933	0.027	0.013	1.005	6	79.4	48.3	31.1	1.55	4.8	17.4	19.8	17.8	8.5	47.1	11.5	2.94	65	11.237	254	4.8	0.75	1.49	3.89	4.47	140	102	5.69	4.11	121	38	92.4	29.5
Don	Dor6	29	19.7055	115	79	164	53	Rec214	Dor6	Response	Dor6	Female	2020.08.01	0.001	1000	0.005	5.933	0.027	0.013	1.005	6	79.4	48.3	31.1	1.55	4.8	17.4	19.8	17.8	8.5	47.1	11.5	2.94	65	11.237	254	4.8	0.75	1.49	3.89	4.47	140	102	5.69	4.11	121	38	92.4	29.5
Don	Dor6	29	19.7055	115	79	164	53	Rec289	Dor6	Response	Dor6	Female	2020.08.01	0.001	1000	0.005	5.933	0.027	0.013	1.005	6	79.4	48.3	31.1	1.55	4.8	17.4	19.8	17.8	8.5	47.1	11.5	2.94	65	11.237	254	4.8	0.75	1.49	3.89	4.47	140	102	5.69	4.11	121	38	92.4	29.5
Don	Dor6	29	19.7055	115	79	164	53	Rec29	Dor6	Response	Dor6	Female	2020.08.01	0.001	1000	0.005	5.933	0.027	0.013	1.005	6	79.4	48.3	31.1	1.55	4.8	17.4	19.8	17.8	8.5	47.1	11.5	2.94	65	11.237	254	4.8	0.75	1.49	3.89	4.47	140	102	5.69	4.11	121	38	92.4	29.5
Don	Dor6	29	19.7055	115	79	164	53	Rec324	Dor6	Response	Dor6	Female	2020.08.01	0.001	1000	0.005	5.933	0.027	0.013	1.005	6	79.4	48.3	31.1	1.55	4.8	17.4	19.8	17.8	8.5	47.1	11.5	2.94	65	11.237	254	4.8	0.75	1.49	3.89	4.47	140	102	5.69	4.11	121	38	92.4	29.5
Don	Dor6	29	19.7055	115	79	164	53	Rec329	Dor6	Response	Dor6	Female	2020.08.01	0.001	1000	0.005	5.933	0.027	0.013	1.005	6	79.4	48.3	31.1	1.55	4.8	17.4	19.8	17.8	8.5	47.1	11.5	2.94	65	11.237	254	4.8	0.75	1.49	3.89	4.47	140	102	5.69	4.11	121	38	92.4	29.5
Don	Dor6	29	19.7055	115	79	164	53	Rec39	Dor6	Nonresponse	Dor6	Female	2020.08.01	0.001	1000	0.005	5.933	0.027	0.013	1.005	6	79.4	48.3	31.1	1.55	4.8	17.4	19.8	17.8	8.5	47.1	11.5	2.94	65	11.237	254	4.8	0.75	1.49	3.89	4.47	140	102	5.69	4.11	121	38	92.4	29.5
Don	Dor6	29	19.7055	115	79	164	53	Rec43	Dor6	Response	Dor6	Female	2020.08.01	0.001	1000	0.005	5.933	0.027	0.013	1.005	6	79.4	48.3	31.1	1.55	4.8	17.4	19.8	17.8	8.5	47.1	11.5	2.94	65	11.237	254	4.8	0.75	1.49	3.89	4.47	140	102	5.69	4.11	121	38	92.4	29.5
Don	Dor6	29	19.7055	115	79	164	53	Rec76	Dor6	Nonresponse	Dor6	Female	2020.08.01	0.001	1000	0.005	5.933	0.027	0.013	1.005	6	79.4	48.3	31.1	1.55	4.8	17.4	19.8	17.8	8.5	47.1	11.5	2.94	65	11.237	254	4.8	0.75	1.49	3.89	4.47	140	102	5.69	4.11	121	38	92.4	29.5
Don	Dor7	26	20.229	114	85	158	50.5	Rec13	Dor7	Nonresponse	Dor7	Female	2022.06.29	0.001	23.179	0.014	4.096	0.056	0.046	1.01	6	71.1	43.3	27.8	1.56	5.7	16.6	50.6	22.5	10.6	70.7	20.8	2.4	55	124.93	277	4.32	0.61	1.23	2.92	4.27	142	111	7.38	4.71	139	41.5	88.2	29.4
Don	Dor7	26	20.229	114	85	158	50.5	Rec13	Dor7	Nonresponse	Dor7	Female	2022.10.29	0.008	18.038	0.038	9.232	0.097	0.034	1.02	5	78.6	47.9	30.7	1.56	5.2	13.6	19.7	18.7	8.9	77.7	19.7	2.9	50	127.6	308	5.04	0.67	1.62	2.95	4.47	142	107	12.55	4.76	141	42.3	88.7	29.6
Don	Dor7	26	20.229	114	85	158	50.5	Rec143	Dor7	Response	Dor7	Female	2022.06.29	0.001	23.179	0.014	4.096	0.056	0.046	1.01	6	71.1	43.3	27.8	1.56	5.7	16.6	50.6	22.5	10.6	70.7	20.8	2.4	55	124.93	277	4.32	0.61	1.23	2.92	4.27	142	111	7.38	4.71	139	41.5	88.2	29.4
Don	Dor7	26	20.229	114	85	158	50.5	Rec143	Dor7	Response	Dor7	Female	2022.10.29	0.008	18.038	0.038	9.232	0.097	0.034	1.02	5	78.6	47.9	30.7	1.56	5.2	13.6	19.7	18.7	8.9	77.7	19.7	2.9	50	127.6	308	5.04	0.67	1.62	2.95	4.47	142	107	12.55	4.76	141	42.3	88.7	29.6
Don	Dor7	26	20.229	114	85	158	50.5	Rec168	Dor7	Response	Dor7	Female	2022.06.29	0.001	23.179	0.014	4.096	0.056	0.046	1.01	6	71.1	43.3	27.8	1.56	5.7	16.6	50.6	22.5	10.6	70.7	20.8	2.4	55	124.93	277	4.32	0.61	1.23	2.92	4.27	142	111	7.38	4.71	139	41.5	88.2	29.4
Don	Dor7	26	20.229	114	85	158	50.5	Rec168	Dor7	Response	Dor7	Female	2022.10.29	0.008	18.038	0.038	9.232	0.097	0.034	1.02	5	78.6	47.9	30.7	1.56	5.2	13.6	19.7	18.7	8.9	77.7	19.7	2.9	50	127.6	308	5.04	0.67	1.62	2.95	4.47	142	107	12.55	4.76	141	42.3	88.7	29.6
Don	Dor7	26	20.229	114	85	158	50.5	Rec185	Dor7	Response	Dor7	Female	2022.06.29	0.001	23.179	0.014	4.096	0.056	0.046	1.01	6	71.1	43.3	27.8	1.56	5.7	16.6	50.6	22.5	10.6	70.7	20.8	2.4	55	124.93	277	4.32	0.61	1.23	2.92	4.27	142	111	7.38	4.71	139	41.5	88.2	29.4
Don	Dor7	26	20.229	114	85	158	50.5	Rec185	Dor7	Response	Dor7	Female	2022.10.29	0.008	18.038	0.038	9.232	0.097	0.034	1.02	5	78.6	47.9	30.7	1.56	5.2	13.6	19.7	18.7	8.9	77.7	19.7	2.9	50	127.6	308	5.04	0.67	1.62	2.95	4.47	142	107	12.55	4.76	141	42.3	88.7	29.6
Don	Dor7	26	20.229	114	85	158	50.5	Rec189	Dor7	Response	Dor7	Female	2022.06.29	0.001	23.179	0.014	4.096	0.056	0.046	1.01	6	71.1	43.3	27.8	1.56	5.7	16.6	50.6	22.5	10.6	70.7	20.8	2.4	55	124.93	277	4.32	0.61	1.23	2.92	4.27	142	111	7.38	4.71	139	41.5	88.2	29.4
Don	Dor7	26	20.229	114	85	158	50.5	Rec189	Dor7	Response	Dor7	Female	2022.10.29	0.008	18.038	0.038	9.232	0.097	0.034	1.02	5	78.6	47.9	30.7	1.56	5.2	13.6	19.7	18.7	8.9	77.7	19.7	2.9	50	127.6	308	5.04	0.67	1.62	2.95	4.47	142	107	12.55	4.76	141	42.3	88.7	29.6
Don	Dor7	26	20.229	114	85	158	50.5	Rec196	Dor7	Response	Dor7	Female	2022.06.29	0.001	23.179	0.014	4.096	0.056	0.046	1.01	6	71.1	43.3	27.8	1.56	5.7	16.6	50.6	22.5	10.6	70.7	20.8	2.4	55	124.93	277	4.32	0.61	1.23	2.92	4.27	142	111	7.38	4.71	139	41.5	88.2	29.4
Don	Dor7	26	20.229	114	85	158	50.5	Rec196	Dor7	Response	Dor7	Female	2022.10.29	0.008	18.038	0.038	9.232	0.097	0.034	1.02	5	78.6	47.9	30.7	1.56	5.2	13.6	19.7	18.7	8.9	77.7	19.7	2.9	50	127.6	308	5.04	0.67	1.62	2.95	4.47	142	107	12.55	4.76	141	42.3	88.7	29.6
Don	Dor7	26	20.229	114	85	158	50.5	Rec20	Dor7	Response	Dor7	Female	2022.06.29	0.001	23.179	0.014	4.096	0.056	0.046	1.01	6	71.1	43.3	27.8	1.56	5.7	16.6	50.6	22.5	10.6	70.7	20.8	2.4	55	124.93	277	4.32	0.61	1.23	2.92	4.27	142	111	7.38	4.71	139	41.5	88.2	29.4
Don	Dor7	26	20.229	114	85	158	50.5	Rec20	Dor7	Response	Dor7	Female	2022.10.29	0.008	18.038	0.038	9.232	0.097	0.034	1.02	5	78.6	47.9	30.7	1.56	5.2	13.6	19.7	18.7	8.9	77.7	19.7	2.9	50	127.6	308	5.04	0.67	1.62	2.95	4.47	142	107	12.55	4.76	141	42.3	88.7	29.6
Don	Dor7	26	20.229	114	85	158	50.5	Rec226	Dor7	Response	Dor7	Female	2022.06.29	0.001	23.179	0.014	4.096	0.056	0.046	1.01	6	71.1	43.3	27.8	1.56	5.7	16.6	50.6	22.5	10.6	70.7	20.8	2.4	55	124.93	277	4.32	0.61	1.23	2.92	4.27	142	111	7.38	4.71	139	41.5	88.2	29.4
Don	Dor7	26	20.229	114	85	158	50.5	Rec226	Dor7	Response	Dor7	Female	2022.10.29	0.008	18.038	0.038	9.232	0.097	0.034	1.02	5	78.6	47.9	30.7	1.56	5.2	13.6	19.7	18.7	8.9	77.7	19.7	2.9	50	127.6	308	5.04	0.67	1.62	2.95	4.47	142	107	12.55	4.76	141	42.3	88.7	29.6
Don	Dor7	26	20.229	114	85	158	50.5	Rec232	Dor7	Nonresponse	Dor7	Female	2022.06.29	0.001	23.179	0.014	4.096	0.056	0.046	1.01	6	71.1	43.3	27.8	1.56	5.7	16.6	50.6	22.5	10.6	70.7	20.8	2.4	55	124.93	277	4.32	0.61	1.23	2.92	4.27	142	111	7.38	4.71	139	41.5	88.2	29.4
Don	Dor7	26	20.229	114	85	158	50.5	Rec232	Dor7	Nonresponse	Dor7	Female	2022.10.29	0.008	18.038	0.038	9.232	0.097	0.034	1.02	5	78.6	47.9	30.7	1.56	5.2	13.6	19.7	18.7	8.9	77.7	19.7	2.9	50	127.6	308	5.04	0.67	1.62	2.95	4.47	142	107	12.55	4.76	141	42.3	88.7	29.6
Don	Dor7	26	20.229	114	85	158	50.5	Rec242	Dor7	Response	Dor7	Female	2022.06.29	0.001	23.179	0.014	4.096	0.056	0.046	1.01	6	71.1	43.3	27.8	1.56	5.7	16.6	50.6	22.5	10.6	70.7	20.8	2.4	55	124.93	277	4.32	0.61	1.23	2.92	4.27	142	111	7.38	4.71	139	41.5	88.2	29.4
Don	Dor7	26	20.229	114	85	158	50.5	Rec242	Dor7	Response	Dor7	Female	2022.10.29	0.008	18.038	0.038	9.232	0.097	0.034	1.02	5	78.6	47.9	30.7	1.56	5.2	13.6	19.7	18.7	8.9	77.7	19.7	2.9	50	127.6	308	5.04	0.67	1.62	2.95	4.47	142	107	12.55	4.76	141	42.3	88.7	29.6
Don	Dor7	26	20.229	114	85	158	50.5	Rec254	Dor7	Response	Dor7	Female	2022.06.29	0.001	23.179	0.014	4.096	0.056	0.046	1.01	6	71.1	43.3	27.8	1.56	5.7	16.6	50.6	22.5	10.6	70.7	20.8	2.4	55	124.93	277	4.32	0.61	1.23	2.92	4.27	142	111	7.38	4.71	139	41.5	88.2	29.4
Don	Dor7	26	20.229	114	85	158	50.5	Rec254	Dor7	Response	Dor7	Female	2022.10.29	0.008	18.038	0.038	9.232	0.097	0.034	1.02	5	78.6	47.9	30.7	1.56	5.2	13.6	19.7	18.7	8.9	77.7	19.7	2.9	50	127.6	308	5.04	0.67	1.62	2.95	4.47	142	107	12.55	4.76	141	42.3	88.7	29.6
Don	Dor7	26	20.229	114	85	158	50.5	Rec270	Dor7	Response	Dor7	Female	2022.06.29	0.001	23.179	0.014	4.096	0.056	0.046	1.01	6	71.1	43.3	27.8	1.56	5.7	16.6	50.6	22.5	10.6	70.7	20.8	2.4	55	124.93	277	4.32	0.61	1.23	2.92	4.27	142	111	7.38	4.71	139	41.5	88.2	29.4
Don	Dor7	26	20.229	114	85	158	50.5	Rec270	Dor7	Response	Dor7	Female	2022.10.29	0.008	18.038	0.038	9.232	0.097	0.034	1.02	5	78.6	47.9	30.7	1.56	5.2	13.6	19.7	18.7	8.9	77.7	19.7	2.9	50	127.6	308	5.04	0.67	1.62	2.95	4.47	142	107	12.55	4.76	141	42.3	88.7	29.6
Don	Dor7	26	20.229	114	85	158	50.5	Rec271	Dor7	Response	Dor7	Female	2022.06.29	0.001	23.179	0.014	4.096	0.056	0.046	1.01	6	71.1	43.3	27.8	1.56	5.7	16.6	50.6	22.5	10.6	70.7	20.8	2.4	55	124.93	277	4.32	0.61	1.23	2.92	4.27	142	111	7.38	4.71	139	41.5	88.2	29.4
Don	Dor7	26	20.229	114	85	158	50.5	Rec271	Dor7	Response	Dor7	Female	2022.10.29	0.008	18.038	0.038	9.232	0.097	0.034	1.02	5	78.6	47.9	30.7	1.56	5.2	13.6	19.7	18.7	8.9	77.7	19.7	2.9	50	127.6	308	5.04	0.67	1.62	2.95	4.47	142	107	12.55	4.76	141	42.3	88.7	29.6
Don	Dor7	26	20.229	114	85	158	50.5	Rec28	Dor7	Response	Dor7	Female	2022.06.29	0.001	23.179	0.014	4.096	0.056	0.046	1.01	6	71.1	43.3	27.8	1.56	5.7	16.6	50.6	22.5	10.6	70.7	20.8	2.4	55	124.93	277	4.32	0.61	1.23	2.92	4.27	142	111	7.38	4.71	139	41.5	88.2	29.4
Don	Dor7	26	20.229	114	85	158	50.5	Rec28	Dor7	Response	Dor7	Female	2022.10.29	0.008	18.038	0.038	9.232	0.097	0.034	1.02	5	78.6	47.9	30.7	1.56	5.2	13.6	19.7	18.7	8.9	77.7	19.7	2.9	50	127.6	308	5.04	0.67	1.62	2.95	4.47	142	107	12.55	4.76	141	42.3	88.7	29.6
Don	Dor7	26	20.229	114	85	158	50.5	Rec322	Dor7	Response	Dor7	Female	2022.06.29	0.001	23.179	0.014	4.096	0.056	0.046	1.01	6	71.1	43.3	27.8	1.56	5.7	16.6	50.6	22.5	10.6	70.7	20.8	2.4	55	124.93	277	4.32	0.61	1.23	2.92	4.27	142	111	7.38	4.71	139	41.5	88.2	29.4
Don	Dor7	26	20.229	114	85	158	50.5	Rec322	Dor7	Response	Dor7	Female	2022.10.29	0.008	18.038	0.038	9.232	0.097	0.034	1.02	5	78.6	47.9	30.7	1.56	5.2	13.6	19.7	18.7	8.9	77.7	19.7	2.9	50	127.6	308	5.04	0.67	1.62	2.95	4.47	142	107	12.55	4.76	141	42.3	88.7	29.6
Don	Dor7	26	20.229	114	85	158	50.5	Rec332	Dor7	Response	Dor7	Female	2022.06.29	0.001	23.179	0.014	4.096	0.056	0.046	1.01	6	71.1	43.3	27.8	1.56	5.7	16.6	50.6	22.5	10.6	70.7	20.8	2.4	55	124.93	277	4.32	0.61	1.23	2.92	4.27	142	111	7.38	4.71	139	41.5	88.2	29.4
Don	Dor7	26	20.229	114	85	158	50.5	Rec332	Dor7	Response	Dor7	Female	2022.10.29	0.008	18.038	0.038	9.232	0.097	0.034	1.02	5	78.6	47.9	30.7	1.56	5.2	13.6	19.7	18.7	8.9	77.7	19.7	2.9	50	127.6	308	5.04	0.67	1.62	2.95	4.47	142	107	12.55	4.76	141	42.3	88.7	29.6
Don	Dor7	26	20.229	114	85	158	50.5	Rec338	Dor7	Response	Dor7	Female	2022.06.29	0.001	23.179	0.014	4.096	0.056	0.046	1.01	6	71.1	43.3	27.8	1.56	5.7	16.6	50.6	22.5	10.6	70.7	20.8	2.4	55	124.93	277	4.32	0.61	1.23	2.92	4.27	142	111	7.38	4.71	139	41.5	88.2	29.4
Don	Dor7	26	20.229	114	85	158	50.5	Rec338	Dor7	Response	Dor7	Female	2022.10.29	0.008	18.038	0.038	9.232	0.097	0.034	1.02	5	78.6	47.9	30.7	1.56	5.2	13.6	19.7	18.7	8.9	77.7	19.7	2.9	50	127.6	308	5.04	0.67	1.62	2.95	4.47	142	107	12.55	4.76	141	42.3	88.7	29.6
Don	Dor7	26	20.229	114	85	158	50.5	Rec343	Dor7	Response	Dor7	Female	2022.06.29	0.001	23.179	0.014	4.096	0.056	0.046	1.01	6	71.1	43.3	27.8	1.56	5.7	16.6	50.6	22.5	10.6	70.7	20.8	2.4	55	124.93	277	4.32	0.61	1.23	2.92	4.27	142	111	7.38	4.71	139	41.5	88.2	29.4
Don	Dor7	26	20.229	114	85	158	50.5	Rec343	Dor7	Response	Dor7	Female	2022.10.29	0.008	18.038	0.038	9.232	0.097	0.034	1.02	5	78.6	47.9	30.7	1.56	5.2	13.6	19.7	18.7	8.9	77.7	19.7	2.9	50	127.6	308	5.04	0.67	1.62	2.95	4.47	142	107	12.55	4.76	141	42.3	88.7	29.6
Don	Dor7	26	20.229	114	85	158	50.5	Rec354	Dor7	Response	Dor7	Female	2022.06.29	0.001	23.179	0.014	4.096	0.056	0.046	1.01	6	71.1	43.3	27.8	1.56	5.7	16.6	50.6	22.5	10.6	70.7	20.8	2.4	55	124.93	277	4.32	0.61	1.23	2.92	4.27	142	111	7.38	4.71	139	41.5	88.2	29.4
Don	Dor7	26	20.229	114	85	158	50.5	Rec354	Dor7	Response	Dor7	Female	2022.10.29	0.008	18.038	0.038	9.232	0.097	0.034	1.02	5	78.6	47.9	30.7	1.56	5.2	13.6	19.7	18.7	8.9	77.7	19.7	2.9	50	127.6	308	5.04	0.67	1.62	2.95	4.47	142	107	12.55	4.76	141	42.3	88.7	29.6
Don	Dor7	26	20.229	114	85	158	50.5	Rec53	Dor7	Response	Dor7	Female	2022.06.29	0.001	23.179	0.014	4.096	0.056	0.046	1.01	6	71.1	43.3	27.8	1.56	5.7	16.6	50.6	22.5	10.6	70.7	20.8	2.4	55	124.93	277	4.32	0.61	1.23	2.92	4.27	142	111	7.38	4.71	139	41.5	88.2	29.4
Don	Dor7	26	20.229	114	85	158	50.5	Rec53	Dor7	Response	Dor7	Female	2022.10.29	0.008	18.038	0.038	9.232	0.097	0.034	1.02	5	78.6	47.9	30.7	1.56	5.2	13.6	19.7	18.7	8.9	77.7	19.7	2.9	50	127.6	308	5.04	0.67	1.62	2.95	4.47	142	107	12.55	4.76	141	42.3	88.7	29.6
Don	Dor7	26	20.229	114	85	158	50.5	Rec74	Dor7	Response	Dor7	Female	2022.06.29	0.001	23.179	0.014	4.096	0.056	0.046	1.01	6	71.1	43.3	27.8	1.56	5.7	16.6	50.6	22.5	10.6	70.7	20.8	2.4	55	124.93	277	4.32	0.61	1.23	2.92	4.27	142	111	7.38	4.71	139	41.5	88.2	29.4
Don	Dor7	26	20.229	114	85	158	50.5	Rec74	Dor7	Response	Dor7	Female	2022.10.29	0.008	18.038	0.038	9.232	0.097	0.034	1.02	5	78.6	47.9	30.7	1.56	5.2	13.6	19.7	18.7	8.9	77.7	19.7	2.9	50	127.6	308	5.04	0.67	1.62	2.95	4.47	142	107	12.55	4.76	141	42.3	88.7	29.6
Don	Dor8	26	21.2585	116	80	168	60	Rec179	Dor8	Response	Dor8	Female	2022.03.22	0.001	0.327	0.016	8.336	1.087	0.009	1.018	6.5	77.5	44.8	32.8	1.37	3.8	10	12.7	16.5	9.4	45.3	13.5	3.5	63	118.3	384	4.06	0.86	1.25	2.3	4.88	141	107	9.66	4.55	144	43.6	95.8	31.7
Don	Dor8	26	21.2585	116	80	168	60	Rec235	Dor8	Nonresponse	Dor8	Female	2022.03.22	0.001	0.327	0.016	8.336	1.087	0.009	1.018	6.5	77.5	44.8	32.8	1.37	3.8	10	12.7	16.5	9.4	45.3	13.5	3.5	63	118.3	384	4.06	0.86	1.25	2.3	4.88	141	107	9.66	4.55	144	43.6	95.8	31.7
Don	Dor8	26	21.2585	116	80	168	60	Rec243	Dor8	Response	Dor8	Female	2022.03.22	0.001	0.327	0.016	8.336	1.087	0.009	1.018	6.5	77.5	44.8	32.8	1.37	3.8	10	12.7	16.5	9.4	45.3	13.5	3.5	63	118.3	384	4.06	0.86	1.25	2.3	4.88	141	107	9.66	4.55	144	43.6	95.8	31.7
Don	Dor8	26	21.2585	116	80	168	60	Rec247	Dor8	Nonresponse	Dor8	Female	2022.03.22	0.001	0.327	0.016	8.336	1.087	0.009	1.018	6.5	77.5	44.8	32.8	1.37	3.8	10	12.7	16.5	9.4	45.3	13.5	3.5	63	118.3	384	4.06	0.86	1.25	2.3	4.88	141	107	9.66	4.55	144	43.6	95.8	31.7
Don	Dor8	26	21.2585	116	80	168	60	Rec287	Dor8	Response	Dor8	Female	2022.03.22	0.001	0.327	0.016	8.336	1.087	0.009	1.018	6.5	77.5	44.8	32.8	1.37	3.8	10	12.7	16.5	9.4	45.3	13.5	3.5	63	118.3	384	4.06	0.86	1.25	2.3	4.88	141	107	9.66	4.55	144	43.6	95.8	31.7
Don	Dor8	26	21.2585	116	80	168	60	Rec292	Dor8	Nonresponse	Dor8	Female	2022.03.22	0.001	0.327	0.016	8.336	1.087	0.009	1.018	6.5	77.5	44.8	32.8	1.37	3.8	10	12.7	16.5	9.4	45.3	13.5	3.5	63	118.3	384	4.06	0.86	1.25	2.3	4.88	141	107	9.66	4.55	144	43.6	95.8	31.7
Don	Dor8	26	21.2585	116	80	168	60	Rec299	Dor8	Nonresponse	Dor8	Female	2022.03.22	0.001	0.327	0.016	8.336	1.087	0.009	1.018	6.5	77.5	44.8	32.8	1.37	3.8	10	12.7	16.5	9.4	45.3	13.5	3.5	63	118.3	384	4.06	0.86	1.25	2.3	4.88	141	107	9.66	4.55	144	43.6	95.8	31.7
Don	Dor8	26	21.2585	116	80	168	60	Rec302	Dor8	Response	Dor8	Female	2022.03.22	0.001	0.327	0.016	8.336	1.087	0.009	1.018	6.5	77.5	44.8	32.8	1.37	3.8	10	12.7	16.5	9.4	45.3	13.5	3.5	63	118.3	384	4.06	0.86	1.25	2.3	4.88	141	107	9.66	4.55	144	43.6	95.8	31.7
Don	Dor8	26	21.2585	116	80	168	60	Rec308	Dor8	Nonresponse	Dor8	Female	2022.03.22	0.001	0.327	0.016	8.336	1.087	0.009	1.018	6.5	77.5	44.8	32.8	1.37	3.8	10	12.7	16.5	9.4	45.3	13.5	3.5	63	118.3	384	4.06	0.86	1.25	2.3	4.88	141	107	9.66	4.55	144	43.6	95.8	31.7
Don	Dor8	26	21.2585	116	80	168	60	Rec345	Dor8	Nonresponse	Dor8	Female	2022.03.22	0.001	0.327	0.016	8.336	1.087	0.009	1.018	6.5	77.5	44.8	32.8	1.37	3.8	10	12.7	16.5	9.4	45.3	13.5	3.5	63	118.3	384	4.06	0.86	1.25	2.3	4.88	141	107	9.66	4.55	144	43.6	95.8	31.7
Don	Dor8	26	21.2585	116	80	168	60	Rec81	Dor8	Nonresponse	Dor8	Female	2022.03.22	0.001	0.327	0.016	8.336	1.087	0.009	1.018	6.5	77.5	44.8	32.8	1.37	3.8	10	12.7	16.5	9.4	45.3	13.5	3.5	63	118.3	384	4.06	0.86	1.25	2.3	4.88	141	107	9.66	4.55	144	43.6	95.8	31.7
Don	Dor9	30	23.6713	117	81	178	75	Rec108	Dor9	Response	Dor9	Male	2022.07.04	0.001	852.314	0.026	11.623	0.015	0.025	1.02	5	75.7	47.3	28.4	1.67	4.4	13	31.3	19.4	9.1	67.7	29.1	3.9	90	98.66	473	4.22	1.52	1.12	2.64	4.32	143	107	5.62	5.18	150	44.8	86.5	29
Don	Dor9	30	23.6713	117	81	178	75	Rec109	Dor9	Response	Dor9	Male	2022.07.04	0.001	852.314	0.026	11.623	0.015	0.025	1.02	5	75.7	47.3	28.4	1.67	4.4	13	31.3	19.4	9.1	67.7	29.1	3.9	90	98.66	473	4.22	1.52	1.12	2.64	4.32	143	107	5.62	5.18	150	44.8	86.5	29
Don	Dor9	30	23.6713	117	81	178	75	Rec112	Dor9	Response	Dor9	Male	2022.07.04	0.001	852.314	0.026	11.623	0.015	0.025	1.02	5	75.7	47.3	28.4	1.67	4.4	13	31.3	19.4	9.1	67.7	29.1	3.9	90	98.66	473	4.22	1.52	1.12	2.64	4.32	143	107	5.62	5.18	150	44.8	86.5	29
Don	Dor9	30	23.6713	117	81	178	75	Rec115	Dor9	Response	Dor9	Male	2022.07.04	0.001	852.314	0.026	11.623	0.015	0.025	1.02	5	75.7	47.3	28.4	1.67	4.4	13	31.3	19.4	9.1	67.7	29.1	3.9	90	98.66	473	4.22	1.52	1.12	2.64	4.32	143	107	5.62	5.18	150	44.8	86.5	29
Don	Dor9	30	23.6713	117	81	178	75	Rec120	Dor9	Nonresponse	Dor9	Male	2022.07.04	0.001	852.314	0.026	11.623	0.015	0.025	1.02	5	75.7	47.3	28.4	1.67	4.4	13	31.3	19.4	9.1	67.7	29.1	3.9	90	98.66	473	4.22	1.52	1.12	2.64	4.32	143	107	5.62	5.18	150	44.8	86.5	29
Don	Dor9	30	23.6713	117	81	178	75	Rec139	Dor9	Response	Dor9	Male	2022.07.04	0.001	852.314	0.026	11.623	0.015	0.025	1.02	5	75.7	47.3	28.4	1.67	4.4	13	31.3	19.4	9.1	67.7	29.1	3.9	90	98.66	473	4.22	1.52	1.12	2.64	4.32	143	107	5.62	5.18	150	44.8	86.5	29
Don	Dor9	30	23.6713	117	81	178	75	Rec147	Dor9	Response	Dor9	Male	2022.07.04	0.001	852.314	0.026	11.623	0.015	0.025	1.02	5	75.7	47.3	28.4	1.67	4.4	13	31.3	19.4	9.1	67.7	29.1	3.9	90	98.66	473	4.22	1.52	1.12	2.64	4.32	143	107	5.62	5.18	150	44.8	86.5	29
Don	Dor9	30	23.6713	117	81	178	75	Rec166	Dor9	Response	Dor9	Male	2022.07.04	0.001	852.314	0.026	11.623	0.015	0.025	1.02	5	75.7	47.3	28.4	1.67	4.4	13	31.3	19.4	9.1	67.7	29.1	3.9	90	98.66	473	4.22	1.52	1.12	2.64	4.32	143	107	5.62	5.18	150	44.8	86.5	29
Don	Dor9	30	23.6713	117	81	178	75	Rec175	Dor9	Response	Dor9	Male	2022.07.04	0.001	852.314	0.026	11.623	0.015	0.025	1.02	5	75.7	47.3	28.4	1.67	4.4	13	31.3	19.4	9.1	67.7	29.1	3.9	90	98.66	473	4.22	1.52	1.12	2.64	4.32	143	107	5.62	5.18	150	44.8	86.5	29
Don	Dor9	30	23.6713	117	81	178	75	Rec176	Dor9	Response	Dor9	Male	2022.07.04	0.001	852.314	0.026	11.623	0.015	0.025	1.02	5	75.7	47.3	28.4	1.67	4.4	13	31.3	19.4	9.1	67.7	29.1	3.9	90	98.66	473	4.22	1.52	1.12	2.64	4.32	143	107	5.62	5.18	150	44.8	86.5	29
Don	Dor9	30	23.6713	117	81	178	75	Rec177	Dor9	Response	Dor9	Male	2022.07.04	0.001	852.314	0.026	11.623	0.015	0.025	1.02	5	75.7	47.3	28.4	1.67	4.4	13	31.3	19.4	9.1	67.7	29.1	3.9	90	98.66	473	4.22	1.52	1.12	2.64	4.32	143	107	5.62	5.18	150	44.8	86.5	29
Don	Dor9	30	23.6713	117	81	178	75	Rec180	Dor9	Response	Dor9	Male	2022.07.04	0.001	852.314	0.026	11.623	0.015	0.025	1.02	5	75.7	47.3	28.4	1.67	4.4	13	31.3	19.4	9.1	67.7	29.1	3.9	90	98.66	473	4.22	1.52	1.12	2.64	4.32	143	107	5.62	5.18	150	44.8	86.5	29
Don	Dor9	30	23.6713	117	81	178	75	Rec187	Dor9	Response	Dor9	Male	2022.07.04	0.001	852.314	0.026	11.623	0.015	0.025	1.02	5	75.7	47.3	28.4	1.67	4.4	13	31.3	19.4	9.1	67.7	29.1	3.9	90	98.66	473	4.22	1.52	1.12	2.64	4.32	143	107	5.62	5.18	150	44.8	86.5	29
Don	Dor9	30	23.6713	117	81	178	75	Rec205	Dor9	Response	Dor9	Male	2022.07.04	0.001	852.314	0.026	11.623	0.015	0.025	1.02	5	75.7	47.3	28.4	1.67	4.4	13	31.3	19.4	9.1	67.7	29.1	3.9	90	98.66	473	4.22	1.52	1.12	2.64	4.32	143	107	5.62	5.18	150	44.8	86.5	29
Don	Dor9	30	23.6713	117	81	178	75	Rec206	Dor9	Response	Dor9	Male	2022.07.04	0.001	852.314	0.026	11.623	0.015	0.025	1.02	5	75.7	47.3	28.4	1.67	4.4	13	31.3	19.4	9.1	67.7	29.1	3.9	90	98.66	473	4.22	1.52	1.12	2.64	4.32	143	107	5.62	5.18	150	44.8	86.5	29
Don	Dor9	30	23.6713	117	81	178	75	Rec208	Dor9	Nonresponse	Dor9	Male	2022.07.04	0.001	852.314	0.026	11.623	0.015	0.025	1.02	5	75.7	47.3	28.4	1.67	4.4	13	31.3	19.4	9.1	67.7	29.1	3.9	90	98.66	473	4.22	1.52	1.12	2.64	4.32	143	107	5.62	5.18	150	44.8	86.5	29
Don	Dor9	30	23.6713	117	81	178	75	Rec212	Dor9	Response	Dor9	Male	2022.07.04	0.001	852.314	0.026	11.623	0.015	0.025	1.02	5	75.7	47.3	28.4	1.67	4.4	13	31.3	19.4	9.1	67.7	29.1	3.9	90	98.66	473	4.22	1.52	1.12	2.64	4.32	143	107	5.62	5.18	150	44.8	86.5	29
Don	Dor9	30	23.6713	117	81	178	75	Rec213	Dor9	Response	Dor9	Male	2022.07.04	0.001	852.314	0.026	11.623	0.015	0.025	1.02	5	75.7	47.3	28.4	1.67	4.4	13	31.3	19.4	9.1	67.7	29.1	3.9	90	98.66	473	4.22	1.52	1.12	2.64	4.32	143	107	5.62	5.18	150	44.8	86.5	29
Don	Dor9	30	23.6713	117	81	178	75	Rec22	Dor9	Response	Dor9	Male	2022.07.04	0.001	852.314	0.026	11.623	0.015	0.025	1.02	5	75.7	47.3	28.4	1.67	4.4	13	31.3	19.4	9.1	67.7	29.1	3.9	90	98.66	473	4.22	1.52	1.12	2.64	4.32	143	107	5.62	5.18	150	44.8	86.5	29
Don	Dor9	30	23.6713	117	81	178	75	Rec241	Dor9	Response	Dor9	Male	2022.07.04	0.001	852.314	0.026	11.623	0.015	0.025	1.02	5	75.7	47.3	28.4	1.67	4.4	13	31.3	19.4	9.1	67.7	29.1	3.9	90	98.66	473	4.22	1.52	1.12	2.64	4.32	143	107	5.62	5.18	150	44.8	86.5	29
Don	Dor9	30	23.6713	117	81	178	75	Rec249	Dor9	Response	Dor9	Male	2022.07.04	0.001	852.314	0.026	11.623	0.015	0.025	1.02	5	75.7	47.3	28.4	1.67	4.4	13	31.3	19.4	9.1	67.7	29.1	3.9	90	98.66	473	4.22	1.52	1.12	2.64	4.32	143	107	5.62	5.18	150	44.8	86.5	29
Don	Dor9	30	23.6713	117	81	178	75	Rec261	Dor9	Response	Dor9	Male	2022.07.04	0.001	852.314	0.026	11.623	0.015	0.025	1.02	5	75.7	47.3	28.4	1.67	4.4	13	31.3	19.4	9.1	67.7	29.1	3.9	90	98.66	473	4.22	1.52	1.12	2.64	4.32	143	107	5.62	5.18	150	44.8	86.5	29
Don	Dor9	30	23.6713	117	81	178	75	Rec280	Dor9	Response	Dor9	Male	2022.07.04	0.001	852.314	0.026	11.623	0.015	0.025	1.02	5	75.7	47.3	28.4	1.67	4.4	13	31.3	19.4	9.1	67.7	29.1	3.9	90	98.66	473	4.22	1.52	1.12	2.64	4.32	143	107	5.62	5.18	150	44.8	86.5	29
Don	Dor9	30	23.6713	117	81	178	75	Rec305	Dor9	Response	Dor9	Male	2022.07.04	0.001	852.314	0.026	11.623	0.015	0.025	1.02	5	75.7	47.3	28.4	1.67	4.4	13	31.3	19.4	9.1	67.7	29.1	3.9	90	98.66	473	4.22	1.52	1.12	2.64	4.32	143	107	5.62	5.18	150	44.8	86.5	29
Don	Dor9	30	23.6713	117	81	178	75	Rec306	Dor9	Response	Dor9	Male	2022.07.04	0.001	852.314	0.026	11.623	0.015	0.025	1.02	5	75.7	47.3	28.4	1.67	4.4	13	31.3	19.4	9.1	67.7	29.1	3.9	90	98.66	473	4.22	1.52	1.12	2.64	4.32	143	107	5.62	5.18	150	44.8	86.5	29
Don	Dor9	30	23.6713	117	81	178	75	Rec33	Dor9	Response	Dor9	Male	2022.07.04	0.001	852.314	0.026	11.623	0.015	0.025	1.02	5	75.7	47.3	28.4	1.67	4.4	13	31.3	19.4	9.1	67.7	29.1	3.9	90	98.66	473	4.22	1.52	1.12	2.64	4.32	143	107	5.62	5.18	150	44.8	86.5	29
Don	Dor9	30	23.6713	117	81	178	75	Rec331	Dor9	Response	Dor9	Male	2022.07.04	0.001	852.314	0.026	11.623	0.015	0.025	1.02	5	75.7	47.3	28.4	1.67	4.4	13	31.3	19.4	9.1	67.7	29.1	3.9	90	98.66	473	4.22	1.52	1.12	2.64	4.32	143	107	5.62	5.18	150	44.8	86.5	29
Don	Dor9	30	23.6713	117	81	178	75	Rec335	Dor9	Response	Dor9	Male	2022.07.04	0.001	852.314	0.026	11.623	0.015	0.025	1.02	5	75.7	47.3	28.4	1.67	4.4	13	31.3	19.4	9.1	67.7	29.1	3.9	90	98.66	473	4.22	1.52	1.12	2.64	4.32	143	107	5.62	5.18	150	44.8	86.5	29
Don	Dor9	30	23.6713	117	81	178	75	Rec34	Dor9	Response	Dor9	Male	2022.07.04	0.001	852.314	0.026	11.623	0.015	0.025	1.02	5	75.7	47.3	28.4	1.67	4.4	13	31.3	19.4	9.1	67.7	29.1	3.9	90	98.66	473	4.22	1.52	1.12	2.64	4.32	143	107	5.62	5.18	150	44.8	86.5	29
Don	Dor9	30	23.6713	117	81	178	75	Rec352	Dor9	Nonresponse	Dor9	Male	2022.07.04	0.001	852.314	0.026	11.623	0.015	0.025	1.02	5	75.7	47.3	28.4	1.67	4.4	13	31.3	19.4	9.1	67.7	29.1	3.9	90	98.66	473	4.22	1.52	1.12	2.64	4.32	143	107	5.62	5.18	150	44.8	86.5	29
Don	Dor9	30	23.6713	117	81	178	75	Rec36	Dor9	Response	Dor9	Male	2022.07.04	0.001	852.314	0.026	11.623	0.015	0.025	1.02	5	75.7	47.3	28.4	1.67	4.4	13	31.3	19.4	9.1	67.7	29.1	3.9	90	98.66	473	4.22	1.52	1.12	2.64	4.32	143	107	5.62	5.18	150	44.8	86.5	29
Don	Dor9	30	23.6713	117	81	178	75	Rec361	Dor9	Nonresponse	Dor9	Male	2022.07.04	0.001	852.314	0.026	11.623	0.015	0.025	1.02	5	75.7	47.3	28.4	1.67	4.4	13	31.3	19.4	9.1	67.7	29.1	3.9	90	98.66	473	4.22	1.52	1.12	2.64	4.32	143	107	5.62	5.18	150	44.8	86.5	29
Don	Dor9	30	23.6713	117	81	178	75	Rec51	Dor9	Response	Dor9	Male	2022.07.04	0.001	852.314	0.026	11.623	0.015	0.025	1.02	5	75.7	47.3	28.4	1.67	4.4	13	31.3	19.4	9.1	67.7	29.1	3.9	90	98.66	473	4.22	1.52	1.12	2.64	4.32	143	107	5.62	5.18	150	44.8	86.5	29
Don	Dor9	30	23.6713	117	81	178	75	Rec59	Dor9	Response	Dor9	Male	2022.07.04	0.001	852.314	0.026	11.623	0.015	0.025	1.02	5	75.7	47.3	28.4	1.67	4.4	13	31.3	19.4	9.1	67.7	29.1	3.9	90	98.66	473	4.22	1.52	1.12	2.64	4.32	143	107	5.62	5.18	150	44.8	86.5	29
Don	Dor9	30	23.6713	117	81	178	75	Rec65	Dor9	Response	Dor9	Male	2022.07.04	0.001	852.314	0.026	11.623	0.015	0.025	1.02	5	75.7	47.3	28.4	1.67	4.4	13	31.3	19.4	9.1	67.7	29.1	3.9	90	98.66	473	4.22	1.52	1.12	2.64	4.32	143	107	5.62	5.18	150	44.8	86.5	29
Don	Dor9	30	23.6713	117	81	178	75	Rec69	Dor9	Response	Dor9	Male	2022.07.04	0.001	852.314	0.026	11.623	0.015	0.025	1.02	5	75.7	47.3	28.4	1.67	4.4	13	31.3	19.4	9.1	67.7	29.1	3.9	90	98.66	473	4.22	1.52	1.12	2.64	4.32	143	107	5.62	5.18	150	44.8	86.5	29
Don	Dor9	30	23.6713	117	81	178	75	Rec71	Dor9	Response	Dor9	Male	2022.07.04	0.001	852.314	0.026	11.623	0.015	0.025	1.02	5	75.7	47.3	28.4	1.67	4.4	13	31.3	19.4	9.1	67.7	29.1	3.9	90	98.66	473	4.22	1.52	1.12	2.64	4.32	143	107	5.62	5.18	150	44.8	86.5	29
Don	Dor9	30	23.6713	117	81	178	75	Rec75	Dor9	Response	Dor9	Male	2022.07.04	0.001	852.314	0.026	11.623	0.015	0.025	1.02	5	75.7	47.3	28.4	1.67	4.4	13	31.3	19.4	9.1	67.7	29.1	3.9	90	98.66	473	4.22	1.52	1.12	2.64	4.32	143	107	5.62	5.18	150	44.8	86.5	29
Don	Dor9	30	23.6713	117	81	178	75	Rec88	Dor9	Response	Dor9	Male	2022.07.04	0.001	852.314	0.026	11.623	0.015	0.025	1.02	5	75.7	47.3	28.4	1.67	4.4	13	31.3	19.4	9.1	67.7	29.1	3.9	90	98.66	473	4.22	1.52	1.12	2.64	4.32	143	107	5.62	5.18	150	44.8	86.5	29
Don	Dor9	30	23.6713	117	81	178	75	Rec9	Dor9	Response	Dor9	Male	2022.07.04	0.001	852.314	0.026	11.623	0.015	0.025	1.02	5	75.7	47.3	28.4	1.67	4.4	13	31.3	19.4	9.1	67.7	29.1	3.9	90	98.66	473	4.22	1.52	1.12	2.64	4.32	143	107	5.62	5.18	150	44.8	86.5	29
[truncated: 16 more columns]
