# Supplementary material for: FMTdb: An Integrated Database of Clinical and Microbial Profiles for Fecal Microbiota Transplantation
Source: Research Square preprint supplement (doi:10.21203/rs.3.rs-7881739/v1), 2025-11-23
Supplement: Supplementary file 2 [file 9a238d420b6a4dcebee0cce8.xlsx]

## Sheet: Sheet1
Genus	AMQ1008	AMQ1010	AMQ1011	AMQ1013	AMQ1014	AMQ1015	AMQ1017	AMQ1019	AMQ1021	AMQ1023	AMQ1024	AMQ1025	AMQ1026	AMQ1027	AMQ1028	AMQ1030	AMQ1031	AMQ1032	AMQ1033	AMQ1034	AMQ1035	AMQ1036	AMQ1039	AMQ1040	AMQ1041	AMQ1043	AMQ1044	AMQ1046	AMQ1047	AMQ1048	AMQ1050	AMQ1053	AMQ1059	AMQ1060	AMQ1061	AMQ1063	AMQ1066	AMQ1067	AMQ1068	AMQ1069	AMQ1071	AMQ1072	AMQ1073	AMQ1074	AMQ1075	AMQ1077	AMQ1078	AMQ1079	AMQ1082
(Unassigned)	0.043408	0.0759436	0.0316919	0.00401766	0.0625405	0.0910289	0.000308564	0.127018	0.00885384	0.0818982	0.081109	0.17136	0.309706	0.14806	0.0280416	0.03411	0.039635	0.136648	0.000888712	0.0383994	0.260456	0.577867	0.0235785	0.299097	0.00472695	0.903265	0.0725295	0.137809	0.11333	0.095431	0.022893	0.452205	0.0174277	0.107485	0.0294312	0.0806924	0.0817418	0.0695149	0.158466	0.091007	0.00053337	0.118474	0.00210607	0.0222603	0.0299983	0.0685615	0.182744	0.193023	0.176272
Bacteroides	0.51522	0.00625539	0.316706	0.0069441	0.124161	0.266112	0.0012659	0.154378	0.00235968	0.301556	0.0130893	0.00212479	4.41907e-05	0.154791	0.0306971	0.107073	0.113572	0.137552	0.0404239	0.505514	0.000661949	0.000864556	0.0632913	0.0035674	0.0151789	2.31064e-05	0.148874	0.000428012	0.181636	0.382282	0.00193521	0	0.141265	0.228111	0.326475	0.266488	0.280029	0.294681	0.144004	0.394903	0.000480033	0.000512772	0.00072623	0.00022434	0.274685	0.383704	0.25086	0.00835129	0.136156
Faecalibacterium	0.00651175	0.0792207	0.000139353	7.16455e-05	0.0368852	0.00104904	0.000237357	0.0487356	0.000544541	0.0572238	0.0110651	0.0611939	8.83814e-05	0.0867834	0.185594	0.0543645	0.0715688	0.00621805	0.000182726	0.0343241	0.000261511	6.12075e-05	0.018135	0.000348332	0.00296682	0	0.0234458	0.000290828	0.0348967	0.0664087	0.000161767	0	0.0621888	0.0219298	0	0.0846222	0.0233384	0.0033416	0.0038991	2.24459e-05	6.09566e-05	0.0033133	8.17008e-05	3.61839e-05	0.0297767	0.0887757	0.000133411	0.0104545	0.0521923
Prevotella	0.000323358	0.00248338	0.00987209	0.000953436	0.00109984	0	0.000474714	0.028459	0.00193615	0	0.0446501	0.266199	2.65144e-05	0.0570073	0.16784	0.0329992	0.00277374	2.9723e-05	0.000548177	0	0.000572054	0	0.000181199	0.00075672	0.00876437	0	0.168968	0.00271623	0	0.000975708	0.000467326	1.90873e-05	0.432318	0.0128479	0	0.201188	0.0212917	0.00073612	0.0229231	0.000202013	0.00189727	0.000181442	0.118366	7.96046e-05	0.0160748	0	1.90587e-05	0.0155022	0.00067598
uncultured	0.000702466	0.0371227	0.0020903	0.000347205	0.0238782	0.017384	3.16476e-05	0.000891152	0	0.016345	0.0432573	0.0120374	0.106349	0.00757922	0.0035659	0.0194031	0.01154	0.017168	0	0.00412447	2.45166e-05	0	0.00755751	7.20686e-05	0	0	0.00836646	0	0.0154237	0.0153624	0.000113836	0.000160333	0.0025074	0.0198433	0.00923912	0.00799654	0.00824936	0.0331738	0.0413848	7.85608e-05	0	0.00149098	0	2.17103e-05	0.00744188	0.0051089	0.0419768	0.000492459	0.0128937
Alistipes	0.00245306	0.0102578	2.93376e-05	1.65336e-05	0.0755187	0.00084922	9.49427e-05	0	0.00106891	0.0418091	0.073089	0.00561684	0	0.0116252	0.00115323	0.0326134	0.00755824	0.00944596	0	0.0108893	0	0	0.0111135	0.00025224	0	0	0.0119391	6.03606e-05	0.0136957	0.0173743	0.000101853	0	0.00125813	0.018562	0	0.0175102	0.0583303	0.054008	0.0192234	8.97837e-05	5.3337e-05	2.36664e-05	0	0	0.0132495	0.00473425	0	0.001344	0.0287417
Ruminococcus	0	0.00261992	0.0103562	0	0	0	0	0	4.03364e-05	0.0377526	0.00321037	0.00462835	0	0	0.000106218	0.000931241	6.35814e-05	6.53906e-05	1.66114e-05	0	0	0	0	3.60343e-05	0	0	0.0123866	0	0.0162275	0.00159478	2.99568e-05	0	0.103291	0.00161898	0	0.0160036	0.00166031	0.000358374	0.0137556	0	0	0	0	0	0.000240061	0.00494712	0.0012007	3.07787e-05	0.0378549
Subdoligranulum	0.0199144	0.0559401	0.00365253	0.00130615	0.0056092	0	0	0	0.000524373	0.0279088	0.0121923	0.00699333	0	0.00654442	0.00883129	0.0506795	0.0799297	0.0281477	3.32229e-05	0	4.90332e-05	0	0	9.60915e-05	0.000299404	0	0.0162095	0	0.0131173	0.0404751	0.000119827	0	0.00655645	0.0105883	0	0.00133803	0	0.0489423	0.00692769	6.73378e-05	0	0.000189331	0.000290492	0	0.0154839	0	0	0.000697651	0.0235341
Parabacteroides	0.102527	0.00155318	0.013884	2.7556e-05	0.0201908	0.0148613	5.53833e-05	0.0459811	0.000584878	0.0200121	0.00402476	0.00127487	0	0.00439091	0.000819399	0.0077426	0.0058177	0.00661039	0.000166114	0.0173015	0.000155272	0.000107113	0.00464323	0	0.0023045	0	0.00760035	2.74366e-05	0.0155213	0.0201669	6.5905e-05	0	0.0026403	0.0420934	0	0.00892368	0.0715606	0.0527779	0.0181716	7.85608e-05	1.52391e-05	0	0	1.44736e-05	0.0126216	0.00051089	0.00403091	0.00196984	0.0147464
Christensenellaceae_R-7_group	0	0.00390002	6.60095e-05	0	0.00298115	2.49771e-05	0	0	0	0.0175133	0.00116258	0.00325185	0	7.45803e-05	7.58702e-05	0.00196226	0	0.00108192	0	7.37977e-05	0	0	3.01998e-05	0	0	0	0.00766103	0	0.051575	0	7.18963e-05	0	0	0.00434613	0	0.00041089	0.00263144	0.0115745	0.00541339	0	0	0	0	0	0.00561372	0	0	2.05191e-05	0.0299184
UCG-002	0	0.001886	0.00171625	0	0.0174875	0.000224793	0	0	0.000463869	0.0117693	0.0116022	0.0214142	0	0.00331882	0.00115323	0.00411742	0.0155059	0.000350731	0	0	0	0	0	0	0	0	0.0265254	0	0.00741509	0.004892	0.00013181	0	0.00908157	0.0600753	0	0.0125479	0.00512713	0.0017725	0.00344571	0	0	0	0	3.61839e-05	0.00202205	0	0	0.000297527	0.00551633
Romboutsia	0.00120423	0.0245266	2.93376e-05	0.00626071	0.000208391	0.00350303	0	0	0	0.0018065	0.017899	0.0064298	0.00303148	0	0	0.00335912	0.0159748	0.0165379	0	0.00426387	0.00269683	0	8.30496e-05	0	0.000145166	0	0.000841955	0	0.00141991	0.00027589	0	8.78017e-05	0.000248082	0.00176616	0.0370087	0.000537317	0.000793609	0	0.000707278	0.00102129	0	2.36664e-05	7.2623e-05	0	0.00974092	0.0233392	0.0238138	7.1817e-05	0.00508237
Phascolarctobacterium	0	8.53395e-05	7.33439e-05	0.236744	0.00288275	0.00688118	0.0200013	0.00111105	0.000100841	0.00242309	0.199981	0.0202964	0	0.013788	0.019438	0.0205871	0.0095531	0.00408394	0.00563958	0.0630068	0.330451	0	0.12132	0.000708675	0.00173291	0	0.0898541	1.6462e-05	0.0253931	0.0285311	0	0	0.00360605	0.021722	0	0.0259598	0.0339581	0.0233912	0.0247729	7.85608e-05	0	6.31104e-05	0.000136168	0	0.0065278	0.0250421	3.81174e-05	0.0274341	0.0308698
Lachnoclostridium	0.00602114	0.00170679	0.0248562	0.00324609	0.0102112	0.0202939	0.00012659	0.0138302	0.000100841	0.00703128	0.00914719	0.00410177	0.00425998	0.00329085	0.00553853	0.000645217	0.000770924	0.00417311	0.00017442	0.0121192	4.90332e-05	0	0.00854656	4.80457e-05	9.98013e-05	0	0.00455869	0	0.00413201	0.00730772	0	0	0.0122446	0.00645859	0.00697719	0.0129272	0.010129	0.0333869	0.00192234	0.068808	0	0	0	0	0.00377634	0.0350897	0.00749007	0.000769468	0.00203629
Lachnospiraceae_NK4A136_group	0	0.0184931	0.000462067	0	5.78864e-05	0	0	0	0	0.0151443	0.0749479	0.00903498	0	0.00832502	0.000880095	0.0152524	0.000810663	0.00288907	0	0	0	0	7.54996e-05	0	0	0	0.007881	3.2924e-05	0.00959379	0.00267142	0	0	0.0309659	0.000865763	0	0.00623709	0.00619224	0.00168533	0.000244827	0	0	0	0	0	0.00160656	0.00116653	0	0	0.000826198
Clostridium_sensu_stricto_1	0.000892021	0.0252264	0	0.000843212	4.05205e-05	0	0	0	0	0.000551685	0.00106816	0.00134878	0.0179414	0.000130515	0	9.31241e-05	0.00747081	0.00220545	0	0.000746177	0.000130755	0	0	0.0121436	0.000308477	0	0.00106951	0	0.0049509	0	4.19395e-05	0	4.43003e-05	0.00018181	0.00441947	0.000263391	0.00399937	0	0.00334597	0.00437696	0	0	0.000590062	0.000108552	0.00232674	0.000493861	0.0203452	0	0
Streptococcus	0.000791669	0.00890091	0.00163557	0.0148637	0.00565551	0.00471442	0.00684379	0.00668943	0.096404	0.000497599	0.0118264	0.0167027	0.114719	0.121957	0.0195442	0.00437018	0.0049514	0.00152182	0.000971769	0.000155795	0.0286027	0.19555	0.0288333	0.00153746	0.00106152	0.02979	0.000447526	0.016473	0.000458278	0.00820268	0.213185	0.280099	0.00136445	0.00857972	0.0158422	0.00185427	0.00100245	0.00103638	0.00424367	0.0312784	0.517163	0.00325807	0.0125456	0.146784	0.0191679	0.00116653	0.0108063	0.233405	8.34543e-05
Roseburia	0.00292137	0.0176482	0	0.00162029	3.47319e-05	0.00221671	0	0	0	0.0250206	0.00283268	0.00184764	3.53526e-05	0.0643161	0.00515918	0.00023281	0.00311549	0.00113542	0	0	0.000228822	6.12075e-05	0.009596	0	0	0	0.00393671	0	0.0119227	0.000531593	0	0	0.0210249	0.0477728	0.000208794	0.0403199	0.0226283	0	0.0129033	0	0	0	0	0	9.2331e-05	0.00128574	0	0	0.00277903
Ralstonia	0	0	0	0	0	0	0	0	0	0	0	0	0	0	0	0	0	0	0	0	3.26888e-05	0	0	0	0	0	0	0	0	0	0	0	0	0	0	0	0	0	0	0	0	0	0	0	0	0	0	0	0
Blautia	0.0535436	0.106453	0.0302837	0.048493	0.0852552	0.21371	0.00176435	0.00629593	0.00129076	0.0330579	0.0446914	0.0386619	0.000547965	0.114527	0.135231	0.13372	0.0819087	0.105184	0	0.0530688	0.0046173	0	0.0241976	0.00109304	0.00800225	0	0.0217467	0.000323752	0.0216593	0.0424669	0.000227672	1.14524e-05	0.0328265	0.025895	0.169071	0.0515508	0.0642719	0.106447	0.0416387	0.0815573	0.000129533	0.199224	0.00233301	0.000289471	0.0895241	0.0251188	0.145637	0.0122807	0.0274982
Asinibacterium	0	0	0	0	0	0	0	0	0	0	0	0	0	0	0	0	0	0	0	0	0	0	0	0	0	0	0	0	0	0	0	0	0	0	0	0	0	0	0	0	0	0	0	0	0	0	0	0	0
Akkermansia	5.57513e-05	5.97377e-05	0.000520742	2.7556e-05	0	0	1.58238e-05	0.0309126	0.00022185	0.0526265	0.000129831	1.84764e-05	0	0	0	0.000126383	0	0.0424979	0.0304321	0.000122996	0	0.000130066	0	0	9.07285e-05	0	0	4.38986e-05	0.0925196	3.36451e-05	0.0009706	1.90873e-05	0	0	0	0.0462514	0.000762283	0	0.19831	0	0	0	0	0	0.00145883	0	0	5.12978e-05	0
Veillonella	0.0707038	0.00040963	0.117834	0.0258971	0	4.37098e-05	0.00394803	0.123037	0.00707904	0.000292069	0.000153437	0.0425327	0.0211762	0.00108141	0.00491639	0.0005787	6.35814e-05	8.91689e-05	0.0591699	0.000360789	0.0551706	0.000313688	0.00328423	0.00205396	0.000117947	0.00392232	0.000295822	0.0281226	0.000262946	0.0112644	0.0367031	0.00263405	0.000354403	4.32882e-05	0.00703809	0.0013591	0.000605649	5.81148e-05	0	0.191284	0.446812	0.00179865	0.00568275	0.00830782	0.00014773	1.70297e-05	0.0383937	0.0673028	0
Butyricicoccus	0.00279872	0.000913133	0.000161357	0.000126757	0.000260489	0.00394637	0	0	6.05046e-05	0.00673922	0.013945	0.00595865	0.000954519	0.00393411	0.00749598	0.00148333	0.000246378	0.00310902	1.66114e-05	0.00031159	0	0	0.00190259	4.80457e-05	0.0051443	0	0.000538548	0	0.00169037	0.00476415	0	0	0.00440345	0.0018181	0.000165295	0.00234945	0	0.00203402	0.0168931	0	0	0.00126221	0	0	0.00413643	0.0108479	0.000495526	0.000102596	0.00154391
Dialister	0.00110388	0	8.80127e-05	0.00683388	0	0.000118641	0	0.00112262	6.05046e-05	0.0241443	0.000118028	0.0643627	0	4.66127e-05	0.0036266	5.32138e-05	0.000198692	0	0	0	0.000253338	0	0.000113249	0	0	0	0.00210868	1.09747e-05	0	0.000181684	0.00384046	0	0.0225134	5.19458e-05	0.0297531	0	5.22111e-05	3.87432e-05	8.1609e-05	0	0	0.000449662	6.35451e-05	0	0.000156963	0	0.0010387	0	0
Erysipelotrichaceae_UCG-003	0	0.00809872	0	0.00423811	0.000787256	0.0180647	8.70308e-05	0	8.06728e-05	0.00733417	0.0083741	0.0010162	0	0.011187	0.00701041	0.0036651	0.000365593	0.0133575	0	0.000705178	0	2.29528e-05	0.0204302	0	0.00092543	0	0.00195698	5.48733e-05	0.00172042	0.0176637	0	0	0.010827	0.00145448	0.00724688	0.00424586	5.22111e-05	7.74863e-05	0.0144811	0	0	0.00371562	2.72336e-05	0.000759862	0.00104334	0.0021798	0	0.00209295	0.000776125
Coprococcus	0	0.00424137	0	0	0.0031606	0	0	0	0	0.0270218	0.0058424	0.010356	0	0.00654442	0.00701041	0.00139686	0.0128991	0.00697896	9.13629e-05	0.00462466	0	0	0.00364663	4.80457e-05	0.000689536	0	0.00797203	3.84113e-05	0.00253931	0.00220712	3.59482e-05	0	0.00335796	0.00972252	0	0.00759619	0	0.003545	0.00564915	0	0	0.00160932	0	1.44736e-05	0.000720182	0	0	0.000595055	0.0038389
Fusobacterium	0.00120423	0	0.0675571	0	0.000231546	0.00240404	0.000102855	0.00394653	0	0	0.0050103	0.000110859	2.65144e-05	0.000158483	0.000440047	0	0	0	0.105167	0.00225493	0.00506677	0	0.559966	0.000312297	0.00321179	0.000103979	0.059665	0	0	0.000457574	0.000107844	0	0	0.023973	0	0.000379283	0.0135122	0	0.0223971	0.000875391	0.000510511	0.000354996	0.000308648	0.000861177	0.0177091	0.0160505	6.67054e-05	6.15574e-05	6.67635e-05
UCG-005	0	0	2.93376e-05	0	0.00288853	0	0	0	0	0.00355891	0	0.00731667	0	0	0	0.000498879	0	0	0	0	0	0	3.77498e-05	0	0	0	0.00399739	0	0.00876738	6.72902e-05	0	0	0	0.0107008	0	9.48207e-05	0.000605649	0.0105285	0.000208556	0	0	0	0	0	0	0	0	0	0.00386394
NK4A214_group	0	0	0.000242035	0	0.00491456	0.000112397	0	0	4.03364e-05	0.00639306	0.00428442	0.00735362	0	0	0.000318655	0.000352541	0.0080192	6.53906e-05	0	0	0	0	0	4.80457e-05	0	0	0.00185837	0	0.0171742	0.00160151	0	0	0	0.020484	0	0.00372961	0	0	0.00536806	0	0	0	0	2.89471e-05	0.00149576	0	0	0	0.018168
Bifidobacterium	0.0149971	0.00136543	0.00461333	0.000551119	0.0399069	0.0366913	0.00150326	0.057705	0.008753	0.00270434	0.0121333	0.0235482	0.000123734	0.00118396	0.154001	0.00111749	0.118953	0.025318	0.00161131	0.0166127	0.00174885	0	0.00204604	0.586086	0.137054	0.000167522	0.000166874	0.00100967	0.0206075	0.0113451	0.000173749	0.00396253	0.00189605	0	0.0378787	8.42851e-05	0.00131572	0.0254155	0.00781633	0	0	0.0907054	0.0599049	0.00183814	0.00601998	0.0694896	0.0262819	0.000933621	0.0173585
Monoglobus	0	0.00144224	0.000212697	0	0.000144716	0.00109899	0	0	0	0.00485699	0.00161699	0.00628199	0	0.00141702	0.000728354	0.000139686	0.00264657	0.00490429	0	0.00341109	0	0	0.000249149	0	0	0	0.000417185	0	0.00440999	0.00294058	0	0	0.00645013	0.00185273	0.0160249	0.000705887	0	0.000387432	0.00363613	0	0	0	0	0	0.000276993	0.000298019	0	0	0.00382221
Escherichia-Shigella	0.0108938	0.330136	0.105923	0.0374596	0.0547432	0.00697484	0.00469966	0.0169666	0.710586	0.00685821	0.000206549	0	0.148967	0	0.000698006	0.259816	0.00334597	0.11205	0.00612962	0.129892	0.145547	0.0028538	0.00858431	0.0351094	0.000562516	9.24257e-05	0.167746	0.804772	0.00081889	0.0161429	0.371818	0.145323	0.000443003	0.120835	0.0364693	0.000463568	0.125411	0.00587928	0.00371774	0.0825786	4.57174e-05	0.000575882	0.0395069	0.745844	0.274075	0.0647554	0.0855354	0.141438	0.0285163
Lachnospira	0.00178404	0.000622979	0.00121017	0.000270048	0	0.00701855	0	0.000717551	0	0.00628489	0.00153437	0.00304861	0.000821947	0.000559352	0.00147188	0	0.000127163	0.00520747	0	0.00203354	0	0	0.00699126	0	0	0	0.00804788	0	0.00544675	0.00507368	0.000125819	0	0	0.000735899	0	0.00200177	5.22111e-05	0	0.000362707	0	0	0	0	0	6.46317e-05	0	0.00447879	0	0.00198621
Incertae_Sedis	0	0.00296128	0	0.00032516	0.0014761	0.000387144	0	0	6.05046e-05	0.000962745	0.00587781	0.00123792	0.00319057	0.000410191	0.00195745	0.00199552	0.0029168	0.000332897	0	0.0030913	0	0	0.000800296	0	0	0	0.00144118	0	0.00240408	0.0163246	0	0	0.000469583	0.00519458	0.00253162	0.00214927	9.39801e-05	0.00665414	0.00876843	0.0010774	0	0	0	5.06575e-05	0.000664783	0.00165188	0.000771877	0	0.00207801
Sutterella	0.055361	0.000153611	0.0389969	0.00839905	0.00185816	0.0231912	0.103907	0.0045252	0	0	0.0108527	0.0142084	0	0.00137041	0.00320172	0.0044234	0.000810663	0.0004399	0	0.00275511	0.00124218	0	0	0.0516011	0.000680463	0	0.0107937	0	0.00468045	6.05612e-05	0.000101853	0	0	0.0170642	0	0.0031923	0.00585809	0	0.00181353	0	0	0.000220886	4.53893e-05	0	0.000812513	0.0217128	0	0.12847	0.007586
Bradyrhizobium	0	0	0	0	0	0	0	0	0	0	0	0	0	0	0	0	0	0	0	0	0	0	0	0	0	0	0	0	0	0	0	0	0	0	0	0	0	0	0	0	0	0	0	0	0	0	0	0	0
[Ruminococcus]_gnavus_group	0	0	0	0	0	0	0	0	0	0	0	0	0	0	0	0	0	0	0	0	0	0	0	0	0	0	0	0	0	0	0	0	0	0	0	0	0	0	0	0	0	0	0	0	0	0	0	0	0
[Ruminococcus]_torques_group	0	0	0	0	0	0	0	0	0	0	0	0	0	0	0	0	0	0	0	0	0	0	0	0	0	0	0	0	0	0	0	0	0	0	0	0	0	0	0	0	0	0	0	0	0	0	0	0	0
Flavonifractor	0.00755988	6.82716e-05	0	0	0.00030101	0.00298476	0	0.000138881	6.05046e-05	0.00036779	0	0	0.00241281	0.00115599	0.000182089	0.0009645	0.000651709	0.000231839	0	0.00164815	0	0	0.000754996	0	0	0	0.000106193	0	9.0153e-05	0.00439405	0	0	0.00110751	0.000406909	0.0212622	0.000842851	0.00656816	0.00324474	0.000371774	0.0117953	0	0	0	0	0.000193895	0.0094685	0.000695642	7.1817e-05	0.000308781
[Eubacterium]_ventriosum_group	0	0	0	0	0	0	0	0	0	0	0	0	0	0	0	0	0	0	0	0	0	0	0	0	0	0	0	0	0	0	0	0	0	0	0	0	0	0	0	0	0	0	0	0	0	0	0	0	0
Megamonas	0	0	0.000792114	0	0.000509401	0.0286237	0.850821	0	0	0	0.00467982	0	0	0	0.00106218	0.000439014	0	4.16122e-05	0	0	0.000907115	0	0	0	0.0121213	0	0	0.000153645	0.0221626	0	4.79309e-05	0	0	0.000735899	0	0	0.000992012	0	9.97443e-05	0	0	0	0.319196	0	0.0225565	0	0	0	0.000267054
Butyricimonas	0	0.000290154	0	1.10224e-05	0.0156409	8.11754e-05	0	0	0	0.00329929	0.000590141	0.00015705	0	0.00105345	0.000121392	0.0257621	0.000548389	6.53906e-05	0	0.00788816	0	0	0.00113249	0	0	0	0.00306441	0	0.00136732	0	0	0	0	0.0232804	0	0.00159088	0.00412468	0.00468792	0.00218531	0	0	0	0	0	0.000240061	0	0	0	0.012151
Desulfovibrio	0	2.56019e-05	0.0002347	0	0.00291748	8.11754e-05	0	0	0	0.00975726	0.000354085	0.000203241	0	9.32253e-05	0	0.0443005	0.000953721	0.000540958	0	0.00342749	0	0	0	6.00572e-05	0	0	0.0129251	0	0.0112165	0	0	0	0	0.0147266	0	0	0.0158931	0.00305102	0.0118605	0	0	3.9444e-05	0	0	0.00985172	0	0	2.05191e-05	0.0038389
Holdemanella	0	0.0177933	2.93376e-05	0	4.05205e-05	0	0	0	6.05046e-05	0	0	0.00571846	0	0.0168738	0.000227611	0.0032926	0	0	0	0	0	0	0	0	0	0	0	0	0.00342582	0	0	0	0	0.00643262	0	0.0105778	0	0	4.53383e-05	0	0	0.00212209	0	1.44736e-05	0.003961	0	0	0.00889504	0.00548295
UBA1819	0	0.00269673	0	0	0.00460197	8.11754e-05	0	0	0	0.000237982	0.0118146	0	0.00807806	0.000615287	0	0.000392452	0.00224919	0.000112947	0	0.00109057	0	0.0077504	0.000354848	0	0	0	0.000197215	0	0.000413201	0.000100935	0	0	0.000186061	0.00148046	0.000147896	9.48207e-05	0.00261056	0.0120104	0.0018226	0	0	0	0	0	0	0.00080891	0	0	0.00179427
Dorea	0	0.0398877	0.00142287	0	0.0240808	0.0130692	0.000118678	0	0	0.00497599	0.0545113	0.0108919	0	0.0256183	0.0179205	0.0145074	0.0112936	0.0361669	0	0.00824894	5.72054e-05	0	0.00220459	0.000156149	0.0129379	0	0.00462696	5.48733e-05	0.00234398	0.0258193	4.19395e-05	0	0.0112434	0.00314272	0	0.0142758	0	0.00073612	0.00643804	0	0	0.088465	0.000490205	0.00150525	0.00767271	0.0106691	0	0.00162101	0.00538281
[Eubacterium]_eligens_group	0	0	0	0	0	0	0	0	0	0	0	0	0	0	0	0	0	0	0	0	0	0	0	0	0	0	0	0	0	0	0	0	0	0	0	0	0	0	0	0	0	0	0	0	0	0	0	0	0
Turicibacter	0.000144953	0.0032429	0	0	4.63092e-05	0	0	0	0	0.00121154	0.00138683	0	0.00620437	0.000372901	0	0.00015299	0.000739134	0.000891689	0	0	0	0	0	0	0	0	9.86074e-05	0	0.000338074	0	0	3.05397e-05	9.74607e-05	0.000225098	8.69974e-05	0	0	0	3.62707e-05	0.000920283	0	0	0	0	7.38648e-05	0	0.0182011	0	0
Megasphaera	0.0285001	4.26698e-05	0.0341049	0.545349	0	0	0.000150326	0.272612	0.000403364	0.00770196	0	0.000110859	0.000371202	0	0.000940791	0	4.7686e-05	0	0.00137044	3.2799e-05	0.0830786	0	0	0	0	0	0	0.00125111	0	7.40192e-05	0.00463731	0.00168732	0	0	0	8.42851e-05	9.39801e-05	0	1.81353e-05	3.36689e-05	0.000167631	0	0.000971332	0.00148354	0	0	0	0.000420642	0
Lactobacillus	0.0123099	0.0069381	0	0.00563244	0.026211	0	0.000450978	0.0100689	0.0457011	3.24521e-05	0.0690229	0.00181069	0	0	0	0.000878027	0	0.000267507	0.73925	0.00217293	0.0141624	0.000374896	0	0.00033632	0.718896	0.0129858	0	0.000214006	0	0.00027589	0.000143793	0.000847477	0	0.000389594	0.00423677	0	0	0	3.62707e-05	0.00117841	0	7.8888e-05	0.41278	0.0103052	0.000674016	0	0.000981523	0.077193	0
Anaerostipes	0.00125998	0.000401096	0.00143754	0	0.000179448	0.000106152	4.74714e-05	0.00248828	8.06728e-05	0.00354809	0.000106225	0.00288232	0.00737101	0.00238657	0.0670389	0.000226159	0.000453017	0.00604565	0	0.00517404	0.000155272	0	0.0126915	0	0	0	0.000523378	3.84113e-05	0.00352348	0.0100262	0.000125819	0	0.00208212	0.000129865	0.0427505	0.00469889	3.13267e-05	0.000290574	0.00774378	0	0	0.0264827	9.98566e-05	0	0.000544753	0.0106861	0.00728995	0.0004822	0.00532439
Odoribacter	0	0.000273086	2.20032e-05	0	0.00162661	0.000936639	0	0	6.05046e-05	0.00936783	0.00107406	0.000859154	0	0.00300186	0.000197263	0.00197556	0.000604023	0.000214005	0	0.00210733	0	4.59056e-05	0.000528497	0	0	0	0.00312509	0	0.00564208	0	2.39654e-05	0	0.00227704	0.00228562	0	0.00347676	0.0165823	0.00553059	0.000398977	0	0	0	0	0	0.000618618	0	0	0.000328306	0.00974747
Barnesiella	0	0	0	0	0.00064254	0	0	0	0	0.000800485	0.000359986	0	0	0	0	7.31689e-05	0.00013511	0.0008798	0	0	0	0	0	0	0	0	0.000371674	0	0.000292997	0.000497948	0	0	0	0.00262326	0	0.000358211	0	0.00206307	0	0	0	0	0	0	0.000240061	0	0	0	0.000442308
Parasutterella	0	0	0	0	0.000434148	0	1.58238e-05	0	0	0.0152308	0.000141634	0.000508102	0	0.000205096	0.00452187	0.00913947	0.000127163	0.000564737	0	0.00342749	7.35498e-05	0.000153019	0.000113249	3.60343e-05	0	0	7.58518e-05	1.6462e-05	0.00108184	0.0742278	0.00022168	0.000213778	0.0226375	0.00109086	0	0.00224409	7.30956e-05	0.0138894	0.000199489	0	0	0	0	3.61839e-05	0.000221594	0	0	0.00670976	5.8418e-05
Collinsella	0	0.0594646	0.000132019	0	0.25154	0.139784	0.000276916	0.0097911	0.000403364	0.00732335	0.0478663	0.0154093	2.65144e-05	0.0228775	0.020136	0.0125651	0.244574	0.209826	0.000307312	0.0232135	0.00319533	0.000153019	0.000181199	0.00269056	0.0101344	0	0.013403	3.84113e-05	0.013846	0	7.78877e-05	1.90873e-05	0	0.0327951	0	0.0094926	0.000135749	0.0876661	0.030159	4.48919e-05	3.04783e-05	0.443445	0.00704443	0.000738152	0.0347534	0.0347065	2.8588e-05	0.00151842	0.095163
Haemophilus	0.000100352	0	9.53471e-05	0	0	0.000231038	0.000340211	0.0049187	0	0.000118991	7.08169e-05	0.00325185	6.1867e-05	0.00226538	0.000819399	0	0	0	0	1.63995e-05	0.0011768	0	6.79497e-05	0.000468446	7.25828e-05	6.35427e-05	0.000826785	0	0.000225383	0.000329722	0.0492729	0	0	0	0	0.00102196	4.17689e-05	0	0	0.000684601	0.0150639	0	0.000363115	0	0.000193895	1.70297e-05	0.00115305	0.00544783	0
Tyzzerella	0	0.000170679	0	0	0	0.0114582	0	0.000705978	0	0.00334256	0	0	0.000273982	0	0	1.99552e-05	0.0206083	0.000285341	0	0.00177934	0	0	0.0105699	0	0	0	0	0	0.000420714	0.00399704	0	0	0	0	0.0155029	0	0.000135749	0.00467824	0.0196678	0	5.3337e-05	0	6.35451e-05	0	0	0	0.0246619	0	0
Bilophila	0.000289907	0.000640046	0	4.40895e-05	0.00974808	0.00612562	0.00136876	9.25872e-05	0	0.00419714	0.0118559	0.00211555	0	0.000596642	0.00063731	0.00692444	0.00379899	0.0101593	0.000398674	0.00236973	0.0115473	0	0	7.20686e-05	1.81457e-05	0	0.00175218	0	0.00234398	0.00469013	0	0	0	0.0018181	0	0.00544692	0.00249569	0.0055209	0.0106454	0.00622875	3.04783e-05	0.000118332	5.44672e-05	0	0.00565066	0.00677781	0.00465032	0.000287268	0.00116002
Holdemania	0	0	0	0	0	0	0	0	0	0	0	0	0	0	0	0	0	0	0	0	0	0	0	0	0	0	0	0	0	0	0	0	0	0	0	0	0.0004699	0	0	0	0	0	0	0	0	0	0	0	0
Paraprevotella	0	0.000529105	0	0.000176358	0.00443989	1.24885e-05	0	0	0	0.0171022	0.00244318	2.77146e-05	0	0.00465194	0	0.000658521	0.000556337	0	0	0	0	0	0	0	0	0	0	0	0.00628066	0	0	0	0	0.00111683	0	0.00605799	0	0	0.000516857	0	0	0	0	0	0.00276993	0	0	7.1817e-05	0.0110577
Intestinibacter	0.0065675	0.000384028	0.00189227	0.000865257	0	6.86869e-05	0	0	0	0.00242309	0.000147535	0.00208784	0.00113128	0.000130515	0	2.66069e-05	0.000540442	7.72798e-05	0	0.000467386	0.000212477	0	0.000588897	0	0	0	0.000523378	0.000159133	0	0.00153422	0	0	0.00127585	0.00173153	0.0154246	0.000589995	0.00216154	0	0.011788	0	0	0	0	0	0.000212361	0.0149946	0.0397088	9.23361e-05	0
Alloprevotella	0	0	0	3.30671e-05	0	0	0	0	0.000100841	0	0	0.0220054	0	0	0.000257959	0	0	0	0	0	0.000604743	0	6.03997e-05	0	0	0	0	0	0	0	0	0	0	0	0	9.48207e-05	0.00037592	0	0.00011788	0	0.000304783	0	0	0	0	0	0	0	0
Family_XIII_AD3011_group	0	0.00303809	0	0.000126757	0.00588705	0.000237282	0	0	0	0.00164424	0.0126113	0.00128411	0.00129921	0.00381292	0	0.000572048	0.00444275	0.000255618	0	0.000188594	5.72054e-05	0	0	9.60915e-05	0	0	0.00084954	0	0.000308023	0	0.000401421	0	0	0.00156703	0	0.000979814	0.000135749	0.00648948	0.003618	0	0	0	0	0	0.00107104	0	0	0	0.00823694
Erysipelatoclostridium	0.0113956	5.97377e-05	0.00192894	0.00346654	0.000104196	4.37098e-05	0	0.000289335	0	0.000443512	5.31127e-05	0	0.00777756	7.45803e-05	6.06962e-05	0	0.000302012	4.16122e-05	0	0.000270592	0.00206757	0	0.000687047	0	0	5.77661e-05	0	0	0	0.000376825	3.59482e-05	0	0	0	0.00742088	0	0	0.000513347	0.00320995	0.00173956	0	0	0	0	0	0.000468316	0.0140748	5.12978e-05	0
[Eubacterium]_ruminantium_group	0	0	0	0	0	0	0	0	0	0	0	0	0	0	0	0	0	0	0	0	0	0	0	0	0	0	0	0	0	0	0	0	0	0	0	0	0	0	0	0	0	0	0	0	0	0	0	0	0
UCG-003	0	0.000298688	0	0	0.000150505	0	0	0	0	0.00159015	0.000247859	0.00393548	0	0.000447482	0.000515918	0.00196226	0.00667604	0.000665795	0	0	0	0	2.26499e-05	0	0	0	0.00541582	1.6462e-05	0.000909043	0.00230133	0	0	0.0024188	0.00122073	0	0.00182266	0	0.000154973	0	0	0	0	0	0	0.000369324	0	0	0	0.00153556
[Eubacterium]_hallii_group	0	0	0	0	0	0	0	0	0	0	0	0	0	0	0	0	0	0	0	0	0	0	0	0	0	0	0	0	0	0	0	0	0	0	0	0	0	0	0	0	0	0	0	0	0	0	0	0	0
Acinetobacter	0	0	0	2.7556e-05	1.73659e-05	0	0	0	0	0	8.26198e-05	0	0	0	0	2.66069e-05	0	0	0	0.000106597	0	6.88584e-05	0	0	0	0	0	0	0	0	0.000437369	0	0	0	0	0	0	0	0	0	0	0	0	0	0	0	0	0	0
Oscillibacter	0	0.000128009	0	0	0.000960915	0.00236658	0	0	0	0.00131972	0.00116848	5.54293e-05	0	0.000419514	0	0.000878027	0.00116036	8.91689e-05	0	0.00209094	0	0	3.01998e-05	0	0	0	0.000462696	0	0.000698686	0.000780567	0	0	0.00296812	0.00339379	0	0.00033714	0.0059834	0.011836	0.00290165	0	0	0	0	0	3.69324e-05	3.40594e-05	0	0	0.000667635
[Eubacterium]_siraeum_group	0	0	0	0	0	0	0	0	0	0	0	0	0	0	0	0	0	0	0	0	0	0	0	0	0	0	0	0	0	0	0	0	0	0	0	0	0	0	0	0	0	0	0	0	0	0	0	0	0
Lachnospiraceae_UCG-001	0	0	0	0	0	0	0	0	0	0.00621998	0	0.000572769	0	0	0.000212437	4.65621e-05	0	0.000273451	4.15286e-05	0	0	0	3.01998e-05	0	0	0	0.000796444	0	0.000886505	0	0	0	0	0.000259729	0	0.000231784	0	0	0	0	0	0	0	0	0	0	0	0	6.67635e-05
Methanobrevibacter	0	0	0	0	0	0	0	0	0	0	0	0	0	0	0	0	0.00534084	0	0	0	0.00867071	0	0	0	0	0	0	0	0.0298256	0	0	0	0	0	0	0	0.0146504	0	0	0	0	0	0	3.61839e-05	0	0	0	0	0.0407841
Faecalitalea	0	0	0	0	0.000688849	0.000287236	0	0	0	0	0.000277366	0	0	7.45803e-05	0	1.99552e-05	0	0.000279396	0	0	0	0	0.000868246	0	0	0	0.000128948	0	0	0.000235516	0	0	0.000310102	0.00018181	0	0	0	0.00433924	0.00342758	0	3.04783e-05	0	0	0	0	0	0	0	9.17998e-05
Agathobacter	0	0.00340505	0	0	0.000613596	0	0	0.0193739	0.000383196	0.0164424	0.0133372	0.0156033	0	0.00536978	0.00291342	0.0557215	0.00515804	0.00498752	0	0	0	0	0.00397128	0.000156149	0.00387411	0	0.0240147	0.000290828	0.00324551	0	0.000119827	0	0.000956887	0.0119735	0	0.0038139	0	0.000445546	0.00396257	0	0	0.000678437	0	0	0.00469041	0.00168594	0	0.0119011	0.00100145
Colidextribacter	0.000122653	0	0	0	4.63092e-05	0.000524518	0	0	0	0.000789667	0.000419	0.000803725	0.00137875	0.000223741	0	0.000139686	0.000111267	2.37784e-05	0	0.00148415	0	0	0.000377498	0	0	0	0.000948148	0	0.00242662	0.00199852	0	0	0.000186061	0.000718584	0	3.16069e-05	0.000114865	0.0105478	0.000562195	3.36689e-05	0	0	0	0	0.000295459	5.1089e-05	0	0	0.0026455
Acidaminococcus	0	0	0.0546485	0	0	0	0	0	0	0	0	0	0	0	0.000652484	0	0	0	0	0	0	0	0	0	0.00362007	0	0.00100883	0	0	0	0	0	0	0	0	0	0	0	0	0	0	0	0.00184281	0	0	0	0	0	0.000625908
Fusicatenibacter	0	0.00105821	0	0	0.0028538	0.0446277	0	0.00299751	0	0.0170049	0.00784888	0.00205088	0	0.042259	0.0493915	0.00369836	0.0161099	0.00340625	4.98343e-05	0.0177606	0.000179789	0	0.0210191	0.00016816	0.00272185	0	0.00606815	0.000159133	0.0226059	0.00999933	5.99136e-05	0	0.00583878	0.00224233	0	0.00328712	0.00700674	0.000242145	0.0140911	0	0	0.0021142	0.00012709	0	0.00227134	0.0206485	5.71761e-05	0.00095414	0.00545791
Eggerthella	0.00249766	0.00064858	0.000946136	0.00390192	0.00606071	0.00151111	0	0	0	0.000129808	0.00512833	0.000194003	0.010376	0.00105345	0.000698006	0.00023281	0.000373541	0.00116514	9.96686e-05	0.000204994	0.00286844	0.000826301	0.00204604	0	0	0	0	0	3.0051e-05	0.00609649	0	0	0.00160367	0	0.00613331	0.00112731	0.000302825	0.0017725	0.00360893	0.00511767	0	0	0	0	1.84662e-05	0.00308237	0.00549843	5.12978e-05	4.17272e-05
Hungatella	0.00111503	0	0.00995277	0	0.00396522	0	0	0	0	9.73562e-05	0.000112127	0	0.00584201	0	0	0	0.00156569	0	0	0.00114796	0.00350588	0	6.03997e-05	0	0	0	0.000151704	0	0.000150255	0.000181684	0	0	0.000230362	0.00155837	0	0.000115892	0	0.000164658	0	0.00383825	0	0	0	0	0	0.00216277	0.0038975	0	0.000934689
Terrisporobacter	0	0	0	3.85783e-05	0	0	0	0	0	0.000227165	0	0.00131183	0.0237658	0	0	0	0.000421227	0.000202116	0	0	0	0	0	0	0	0	0	0	6.0102e-05	4.71032e-05	0	0	0	0	0	0	0	0	0.00121507	0	0	0	0	0	0	0	0.0158187	0	0
[Eubacterium]_xylanophilum_group	0	0	0	0	0	0	0	0	0	0	0	0	0	0	0	0	0	0	0	0	0	0	0	0	0	0	0	0	0	0	0	0	0	0	0	0	0	0	0	0	0	0	0	0	0	0	0	0	0
Cloacibacillus	0	0	0	0	0.0156062	1.24885e-05	0	0	0.000504205	0.000173078	4.13099e-05	0.00234651	0	0	0	0.000332586	0.000572232	0	0	0	0	0	0	9.60915e-05	0	0	0.000280652	0	0.0340177	0	0	0	0	0.00748885	0	9.48207e-05	0.0399729	0	0	0	0	0	0	0	0.00180969	0	0	0	0.0441807
Enterococcus	0.00340083	0.0149173	0	0.000308627	0.00547606	3.74656e-05	0	0.000636537	0.0212573	9.73562e-05	0.00219532	0	0.0180298	0.00876318	0.000136566	0.00639896	0.0221502	0.0104863	0.000157809	0.000426387	0.00174885	0.181098	0	0.000456435	0.000480861	0.0451153	0.00110744	0.000192057	0	0.000531593	0.000179741	0.097918	0	0	0.0704331	0	0.0105362	0.00207276	0.0317822	0.00362502	0	0.00109654	0.000753463	0.0121867	0.0436079	0.000502376	0.0156091	0.0119524	0.0233505
Methylobacterium-Methylorubrum	0	0	0	0	0	0	0	0	0	0	0	0	0	0	0	0	0	0	0	0	0	0	0	0	0	0	0	0	0	0	1.79741e-05	0	0	0	0	0	0	0	0	0	0	0	0	0	0	0	0	0	0
Pseudomonas	0	0	0	0	0	0	0	0	0	0	0	0	0	0	0	0	0	0	0	0	0	0	0	0	0	0	0.000273067	1.09747e-05	0	0	0	0	0	0	0	0	0	0	0	0	0	0	0	0	0	0	0	0	0
Allisonella	0	0	0.000278707	0	0	0	0.00029274	0	0	0	0	0	0	0	0.00101666	0	0	0.000196172	0	0	0	0	0	0	0.000616954	0	0.000303407	0	0.000315536	0	0	0	0	0	0	0.000252855	0	0	0	0	0	0	0.0113019	0	0	0	0	0.000605314	0.000100145
Eisenbergiella	0	7.68056e-05	0	0	0.0120635	0	0	0	0.0004437	0	0.000554733	0	0.10421	0	0	3.99103e-05	0.00254326	0	0	0.000844574	0.00635798	0	0	0	0	0	0	0	0.000751275	0	0	0	0	0.00180079	0	0	0.00799875	0.000503661	0.000253895	0	0	0	0	0	7.38648e-05	0.000110693	0	0	0.00398912
Lachnospiraceae_UCG-004	0.00254226	0	0	0	0	0.000793021	0	0	0	0.000822119	9.44226e-05	0.00135802	0	0.000158483	0.0015174	7.98207e-05	0	0.00015456	0	0.000131196	0	0	0.00161569	0	0.00079841	0	0.00108468	0	0.00132976	0.0203486	0	0	0.00349087	0	0.00301011	0.000537317	0	0	0	0	0	0	0	0	0.000683249	0	0	0.000595055	0
Herbaspirillum	0	0	0	0	0	0	0	0	0	0	0	0	0	0	0	0	0	0	0	0	0	0	0	0	0	0	0	0	0	0	0	0	0	0	0	0	0	0	0	0	0	0	0	0	0	0	0	0	0
Gemella	0	0.000238951	0	0.000562141	1.73659e-05	0.000143618	0.000134502	4.62936e-05	0.00461852	0	0.00112127	0.000914583	0	6.52577e-05	0.000182089	6.65172e-05	5.56337e-05	9.51135e-05	6.64457e-05	0	0.00451923	0.00381782	0.000513397	4.80457e-05	0	0	0.000144118	8.23099e-05	4.50765e-05	1.3458e-05	0.047883	0.00265696	0.000106321	0.000199126	0	0.000200177	3.13267e-05	7.74863e-05	0.00011788	3.36689e-05	0.003505	3.15552e-05	0.000635451	0.00109999	5.53986e-05	0	0	0.000779727	0
Catenibacterium	0	0	0	0	0	0	0	0	0	0	0	0.0224396	0	0	0	0	0	0	0	0	0	0	0	0	0	0	0	0	0	0	0	0	0	0	0	0	0	0	2.7203e-05	0	0	0	0	0	0	0	0	0.00356007	0
Family_XIII_UCG-001	0	8.53395e-05	0	0	0	2.49771e-05	0	0	0	0.000465146	0.00118028	0.000129335	0	0.000139838	0	0.000432362	0	0	0	0	3.26888e-05	0	0	0	0	0	0.000333748	0	0.000292997	0	4.19395e-05	0	0	0.000199126	0	0.000136963	0	9.68579e-05	0.00143269	0	0	0	0	0	0	0	0	0	0
Actinomyces	2.23005e-05	0.000571775	1.46688e-05	0.000633787	0.000382051	8.74197e-05	0	0	0.00933788	0	0.000283268	9.23822e-05	0.000689375	0.000400869	0	0.000359193	7.15291e-05	2.9723e-05	0	0	0.000122583	5.35565e-05	1.50999e-05	0	0	0.000704746	0	0.000230468	0	0	0.00322934	0.000881834	0	0.000129865	0.000278392	3.16069e-05	0.000114865	3.87432e-05	0.000190421	3.36689e-05	0.00135628	0.000165665	8.17008e-05	0.00206972	0	0	0.00043835	0.00137478	0
Fenollaria	0	0	0	0	0	0	0	0	0	0	0	0	0	0	0	0	0.000286116	0	0	0	0	0	0	0	0	0	0	0	0	0	0	0	0	0	0	0	0	0	0	0	0	0	0	0	0	0	0	0	0
Prevotellaceae_UCG-001	0	0	0	0	0	0	0	0	0	0	0	0	0	0	0	0	0	0	0	0	0	0	0	0	0	0	0	0	0	0	0	0	0	0	0	0	0	0	0	0	0	0	0	0	0	0	0	0	0
Sphingomonas	0	0	0	0	0	0	0	0	0	0	0	0	0	0	0	0	0	0	0	0	0	0	0	0	0	0	0	0	0	0	2.99568e-05	0	0	0	0	0	0	0	0	0	0	0	0	0	0	0	0	0	0
[Clostridium]_innocuum_group	0	0	0	0	0	0	0	0	0	0	0	0	0	0	0	0	0	0	0	0	0	0	0	0	0	0	0	0	0	0	0	0	0	0	0	0	0	0	0	0	0	0	0	0	0	0	0	0	0
Porphyromonas	0	0	0	4.40895e-05	5.20978e-05	0	0	0	0	0	4.72113e-05	0	0	0	0	5.98655e-05	0.000516599	0	0	0	0.000768187	0	0	0	0	0	7.58518e-05	0	0	6.05612e-05	1.19827e-05	0	0	0	0	0	0	0	0	0	5.3337e-05	0	0	0	0	0	0	0	0
Granulicatella	0	0.00069125	6.60095e-05	0.00614498	0	0	0.000181974	0.000266188	0.00639332	0	0.00110356	0.00150583	0.000194439	0.000997511	0.000424873	8.64724e-05	0	0.000214005	0	0	0.0020594	0.00497311	0.000936195	0	0	0.0019005	0	0.000570682	0.000120204	5.38322e-05	0.0491112	0.00218741	0	0	0	0.000126428	0	0	0.000199489	0	0.00228587	0	0.000317725	0.00235919	0.000166196	0	0	0.00166205	0
Halomonas	0	0	0	0	0	0	0	0	0	0	0	0	0	0	0	0	0	0	0	0	0	0	0	0	0	0	0	0	0	0	0	0	0	0	0	0	0	0	0	0	0	0	0	0	0	0	0	0	0
Atopobium	0	0.000392562	0	0.00106917	0	0	3.95595e-05	0.000150454	0.000463869	0	0.000295071	0	0	0	0.000349003	3.32586e-05	3.17907e-05	0	0	0	0.000433127	0	9.05995e-05	0	0	0	0	0.000609094	0	4.71032e-05	0.00413404	0.00169877	0	0	0	0	0	0	0	0	0.000106674	0	7.2623e-05	0.00340852	0.000101564	0	7.62348e-05	0.000492459	0
Peptoniphilus	0	0	0	0	0.00114615	0	0	0	0	0	0.00012393	0	0	0	0	0	0.000508651	0	0	0	0.000163444	0	0	0	0	0	0	0	0	0.000195142	0	0	0	0	0	0	0	0	0	0	0	0	0	0	0	0	0	0	0
Brevundimonas	0	0	0	0	0	0	0	0	0	0	0	0	0	0	0	0	0	0	0	0	0	4.59056e-05	0	0	0	0	0	0	0	0	0	0	0	0	0	0	0	0	0	0	0	0	0	0	0	0	0	0	0
Lachnospiraceae_ND3007_group	0	0	0	0	0	0.00177961	0	0	0	0.00163342	0.00012393	0.000434196	0	0.00335611	0.000895269	6.65172e-05	0.00047686	3.56676e-05	0	0	0	0	0.000913545	0	0	0	0.000371674	0	0.00157017	0.00211964	0	0	0.00207326	0.000138522	0	0.00016857	0	0	0.000217624	0	0	0	0	0	0.00108027	0.00361029	0	0.000215451	0.000275399
Pyramidobacter	0.000245306	0	0.0931541	0	0.000584653	3.74656e-05	0	0	0	0.000346156	0	0	0	0	0	1.33034e-05	0	0	0	0	0.000286027	0	0	0	0	0	0.00018963	0	0.0308699	0	0.000461335	0	0	0.00412969	0	0	0.00746619	0	0	0	0	0	0	0	2.76993e-05	0	0	0.000923361	0.0188523
Dielma	0	6.82716e-05	0	0	0.000150505	0	0	0	0	0	0.000147535	0	0	0	0	0	0.000254326	0	0	0	0	0	2.26499e-05	0	0	0	0	0	0	0.000471032	0	0	0	0.00014718	0	0	0	0	0	0	0	0	0	0	0	0	0	0	0.000500726
Negativibacillus	0	0	0	0	1.73659e-05	0	0	0	0	0	0	0	0	0	0	0	0	0.00265129	0	0	0	0	0	0	0	0	0.00264723	0	0.00043574	0	0	0	0.000487304	0.000874421	0	0	3.13267e-05	0.00202433	0.00466078	0	0	0	0	0	0	0	0	0	0
Aquabacterium	0	0	0	0	0	0	0	0	0	0	0	0	0	0	0	0	0	0	0	0	0	0	0	0	0	0	0	0	0	0	0	0	0	0	0	0	0	0	0	0	0	0	0	0	0	0	0	0	0
Prevotellaceae_NK3B31_group	0	0	0	0	0	0	0	0	0	0	0	0	0	0	0	0	1.58953e-05	0	0	0	0	0	0	0	0	0	0	0	0.0180682	0	0	0	0	0	0	0	0	0	0	0	0	0	0	0	0	0	0	0	0
Rikenellaceae_RC9_gut_group	0	0	0	0	0	0	0	0	0	0	0	0	0	0	0	0	0	0	0	0	0	0	0	0	0	0	0	0	0	0	0	0	0	0	0	0	0	0	0	0	0	0	0	0	0	0	0	0	0.000108491
Howardella	0.000111503	0	0.000271372	0	0	0	0	0	0.000544541	0	0	0	0	0	0	0	0	0	0	0	0	0	0	0	0	0	0	0	0	0	0	0.000236683	0	0	0	0	0	0	0	0	0	0	0	0	0	0	0	0	0
Intestinimonas	0	0	0	0	0	0	0	0	0	0.000129808	0	0	0	0	0	3.99103e-05	0	0	0	0	0	0	0	0	0	0	0	0	0.00215616	4.03741e-05	0	0	0	0	0	0	4.17689e-05	0.000309945	0	0	0	0	0	0	0	0	0	0	0.000884616
Pelagibacterium	0	0	0	0	0	0	0	0	0	0	0	0	0	0	0	0	0	0	0	0	0	0	0	0	0	0	0	0	0	0	0	0	0	0	0	0	0	0	0	0	0	0	0	0	0	0	0	0	0
Puia	0	0	0	0	0	0	0	0	0	0	0	0	0	0	0	0	0	0	0	0	0	0	0	0	0	0	0	0	0	0	0	0	0	0	0	0	0	0	0	0	0	0	0	0	0	0	0	0	0
Senegalimassilia	0	0	0	0	0.00518084	0	0	0	0	0	0	0	0	0	0	0.00383139	0.012613	0.0120378	0	0	0	0	0	0	0.00098894	0	0.00125914	0	0.000570969	0	0	0	0	0.00199126	0	0	0	0	0	0	0	0	0	0	0.0014496	0	0	0.000748948	0.00242852
Peptococcus	0	2.56019e-05	0	0	0	0	0	0	0	7.57215e-05	0	0.00025867	0	0	0	1.99552e-05	0	0	0	0	0	0	0	0	0	0	0	0	0.000232895	0	0.000419395	0	0	0.000259729	0	0	0	0	0	0	0	0	0	0	0	0	0	0	4.17272e-05
Rothia	0	0.000110941	0	0.000132269	2.89432e-05	0.000162351	6.32951e-05	8.10138e-05	0.0592542	0.000151443	0.000177042	0.000997727	0.000335849	0.00179925	0.000409699	0.000113079	0	0	0.000182726	0	0.00279489	0.00238709	9.05995e-05	0	0	0.00148459	9.10222e-05	0.00193154	0	4.71032e-05	0.00483503	0.00177894	0	4.32882e-05	7.82976e-05	0.000179106	0	0.000106544	0	0	0.00285734	8.67768e-05	0.000145246	0.000274998	3.69324e-05	0	0.000200116	0.00475018	0
Slackia	0	0	0	1.10224e-05	0	0	0	0	0	0	0	0.00303937	0	0.000540707	0.000106218	0	0	0	0	0.000155795	0.000179789	0	0	0	0	0	0.000477866	0	0	0	0.000814825	2.29048e-05	0	0.000865763	4.34987e-05	0	0	0	0	0	0	0.00710781	0	0	0	0	0	4.10383e-05	0.000100145
DTU089	0	0.000187747	0	0	0	1.87328e-05	0	0	0	4.32694e-05	0	0	0	0	0	0	0	0	0	4.91985e-05	0	0	0	0	0	0	3.79259e-05	0	0.000142742	0	0	0	5.31604e-05	4.32882e-05	0	0	0	0.00199527	2.7203e-05	0	0	0	0	0	0	0	0	0	0.000892961
Nocardiopsis	0	0	0	0	0	0	0	0	0	0	0	0	0	0	0	0	0	0	0	0	0	0	0	0	0	0	0	0	0	0	0	0	0	0	0	0	0	0	0	0	0	0	0	0	0	0	0	0	0
Psychrobacter	0	0	0	0	0	0	0	0	0	0	0	0	0	0	0	0	0	0	0	0	0	0	0	0	0	0	0	0	0	0	0	0	0	0	0	0	0	0	0	0	0	0	0	0	0	0	0	0	0
Corynebacterium	0	5.12037e-05	0	0	0.000723581	0	0	0.000162028	0.000141177	0	0.000129831	0	0	0.000139838	0.000106218	0.000212855	0	0	0	0	0	0	2.26499e-05	0	3.62914e-05	0	0	0	3.75638e-05	0	0.0198913	0.00219504	0	0.000216441	0.000104397	0.000147499	6.26534e-05	0	0.000181353	0.000460142	0	0	8.17008e-05	0	0	0	3.81174e-05	0.000769468	0
Anaerotruncus	0	4.26698e-05	6.60095e-05	0	4.05205e-05	0	0	0	0	0.000822119	0.000483916	0	0	0	0	3.32586e-05	3.17907e-05	0	0	0	0	0	0	0	0	0	0	0	0.00450014	0	0	0	0.000248082	5.19458e-05	0	0	0	0.00127852	0	0	0	0	0	0	2.76993e-05	2.55445e-05	0	0	0.00182765
Idiomarina	0	0	0	0	0	0	0	0	0	0	0	0	0	0	0	0	0	0	0	0	0	0	0	0	0	0	0	0	0	0	0	0	0	0	0	0	0	0	0	0	0	0	0	0	0	0	0	0	0
Lachnospiraceae_UCG-003	0	0	0	0	0	0	0	0	0	0.00113582	0	0	0	0	0	0	0	0	0	0	0	0	0	0	0	0	0	0	0	0	0	0	0	0	0	0.00016857	0	0	0	0	0	0	0	0	0	0	0	0	0
Staphylococcus	0	0	0	0	2.89432e-05	0	0	0	0.00151262	0	0	0	0.000150248	0	0	0	0	0	0	0	0.000114411	0.00742141	0	0	0	0	0	0	0	0	0.000491292	0	0	0	0	0	0	0	0	0	1.52391e-05	0	0	0.00022434	0	0	0	0	0
Proteus	0	0	0	0	0	0	0	0	0	0	0	0	0.000689375	0	0	0	0	0	0	0	0	0	0	0	0	0	0	0	0	0	0	0	0	0	0	0	0	0	0	0	0	0	0	0	0	0	0	0	0
Mitsuokella	0	0	0	0	0	0	0	0	0	0.00245554	0	0	0	0	0	0	0	0	0	0	0	0	0	0	0	0	0.000166874	0	0	0	0	0	0	0	0	0	0	0	0	0	0	0	0	0	0	0	0	0	0
Weissella	0	0	0	0	0	0	0	0	0	5.40868e-05	0.000318676	0	5.30288e-05	0	0.000849747	0	0	7.72798e-05	0	0	0	0.000252481	0	0	0	0.000150192	0	0	0	0	0	0	0	0	0	0	0	4.8429e-05	6.34736e-05	0	0	0	0	0	3.69324e-05	0	0	2.05191e-05	0
Lachnospiraceae_FCS020_group	0	0.000913133	0	0	0.00124456	0	0	0	0	0.00121154	0.000259662	0.000702104	0	0.00167806	0.000682832	0.000292676	0.00121599	9.51135e-05	0	0	0	0	0	0	0	0	0.000508207	0	0.000323048	0	0	0	0	0.00029436	0	0.000284462	0	0	0.000226692	0	0	0.000252442	0	0	0.000156963	0	0	7.1817e-05	0.000317127
Olsenella	0.000178404	7.68056e-05	5.86751e-05	3.30671e-05	2.89432e-05	0	0	0	0.00110925	0	5.90141e-05	0.00504407	0	0	4.55221e-05	0	5.56337e-05	1.78338e-05	0	0	8.1722e-05	0	0	0	0.00241338	0	0	1.6462e-05	0	0	0.00127616	3.05397e-05	0	2.59729e-05	0.000443687	0	0.000156633	0	0	0	0	0	0	5.78942e-05	0	0	0	0.00024623	0
[Eubacterium]_nodatum_group	0	0	0	0	0	0	0	0	0	0	0	0	0	0	0	0	0	0	0	0	0	0	0	0	0	0	0	0	0	0	0	0	0	0	0	0	0	0	0	0	0	0	0	0	0	0	0	0	0
CAG-56	0	3.41358e-05	0	0	0	0	0	0	0	0.00194712	0	0.000240194	0	0.0104972	0.0158114	0.000884679	0.000945773	0	0	0	0	0	0.00594182	0	0	0	0.000986074	0	0.00162275	0	0	0	0.00556412	0.000779187	0	0.0117472	0	0	0	0	0	0	0	0	0.00153269	0	0	0.00366267	0.000659289
UCG-009	0	0	0	0	0	0	0	0	0	0.000378608	0	0.000859154	0	0	0	0	0	0	0	0	0	0	0	0	0	0	4.55111e-05	0	0.000165281	0	0	0	0	0	0	5.26782e-05	0	0	0	0	0	0	0	0	0	0	0	0	0.000250363
Sellimonas	0.00535213	0	0	0	0.00195077	0.000349679	0	0	0	0	0	0	0.00188252	0.000251708	0	0	0	0	0	0	0	0	0.000249149	0	0	0	0	0	0	0	0	0	0	0	0.0155464	0	0	0.0163884	0	0.00690212	0	0	0	0	9.2331e-05	0.019201	5.71761e-05	0	0
Candidatus_Stoquefichus	0	0	0	0	0	0	0	0	0	0	0	0	0	0	0	0	0	0	0	0	0	0	0	0	0	0	0	0	0	0	0	0	0.000168341	0	0	0	0	0.000997637	0	0	0	0	0	0	0	0	0	0	0
Defluviitaleaceae_UCG-011	0	4.26698e-05	0	0	2.89432e-05	0	0	0	0	0.000194712	8.26198e-05	6.46675e-05	0	6.52577e-05	0	1.99552e-05	0	0	0	0	0	0	0	0	0	0	0	0	0.000150255	0	0	0	0	0.000562746	0	0	0.00037592	8.71721e-05	5.4406e-05	0	0	0	0	0	0	0	0	0	0.000575835
Abiotrophia	0	0.000136543	0	0	0	0	6.32951e-05	0	0	0	0	0	0	0	0	0	0	0	0	0	0.000212477	0.0112698	0	0	0	0	0	0	2.25383e-05	0	0.00943639	0	0	0	0	0	0	0	0	0	0	0	9.07787e-05	0.000398023	0	0	0	9.23361e-05	0
Leptotrichia	0	0	0	0.000336183	0	0	0	0.000219895	0	0	0	0	0	2.79676e-05	0	0	0	0	1.66114e-05	0	0.000490332	0	0.000301998	0	0	0	0.000402015	0.000488372	0	0	0.000185732	0	0	0	0	5.26782e-05	0	0	0	0	0.00332213	0	0	0	0	0	0	0.000410383	0
Morganella	0	0	0	0	0	0	0	0	0	0	0	0	0.002457	0	0	0	0	0	5.814e-05	0	0	0	0	0	0	0	0	0	0	0	0	0	0	0	0.000774277	0	0	0	0	0.000953952	0	0	0	0	0	0.00193287	0	0.000277008	0
Candidatus_Soleaferrea	0	2.56019e-05	0	0	0	0	0	0	0	0	0	0	0	0	0	0	1.58953e-05	0	0	0	0	0	0	0	0	0	0	0	5.25893e-05	0	0	0	1.77201e-05	0	0	0	0	0.000251831	0	0	0	0	0	0	0	0	0	0	0.000692671
Solobacterium	0	7.68056e-05	0	0.000755033	2.31546e-05	0	4.74714e-05	0.000162028	0.000342859	0	0.000147535	9.23822e-05	4.41907e-05	1.86451e-05	0.000288307	2.66069e-05	0.000850401	0	0	0	0.000367749	3.82547e-05	0.000158549	0	0	0	0.000326163	0.000159133	0	5.38322e-05	0.0106826	0.000950549	0	3.46305e-05	0	7.37494e-05	0	0	5.4406e-05	0	0.000213348	3.15552e-05	2.72336e-05	0.000752625	3.69324e-05	3.40594e-05	0.000209646	0.000153894	0
Cetobacterium	0	0	0	0	0	0	0	0	0	0	0	0	0	0	0	0	0	0	0	0	0	0	0	0	0	0	0	0	0	0	0	0	0	0	0	9.48207e-05	0	0	0	0	0	0	0	0	0	0	0	0	0
Brevibacterium	0	0	0	0	0	0	0	0	0	0	0	0	0	0	0	0	0	0	0	0	0	0	0	0	0	0	0	0	0	0	0	0	0	0	0	0	0	0	0	0	0	0	0	0	0	0	0	0	0
Coprobacter	0	0	0	0	0	0	0	0	0	0	0	0	0	0	0	0	0	0	0	0.00121356	0	0	0	0	0	0	0	0	7.51275e-05	0	0	0	0	0	0	0	0	0	0	0	0	0	0	0	0	0	0	0	0.000450653
CAG-352	0	0	0	0	0	0	0	0	0	0	0	0	0	0	7.58702e-05	0	0	0	0	0	0	0	0	0	0	0	0	0	0.032981	0	0	0	0	0	0	0	0	0	0	0	0	0	1.81557e-05	0	0	0	0	0	0
Ezakiella	0	0	0	0	0.000196814	0	0	0	0	0	0	0	0	0	0	0	7.15291e-05	0	0	0	0	0	0	0	0	0	0	0	0	0.000262432	0	0	0	0	0	0	0	0	0	0	0	0	0	0	0	0	0	0	0
Enhydrobacter	0	0	0	0	0	0	0	0	0	0	0	0	0	0	0	0	0	0	0	0	0	0	0	0	0	0	0	0	0	0	0.000173749	0	0	0	0	0	0	0	0	0	0	0	0	0	0	0	0	0	0
Eubacterium	0	0.000452299	0	0.00109673	0.00230388	0	0	0.000185174	0.00022185	0	0.000206549	0	0	3.72901e-05	0	5.98655e-05	0.00123189	0	0	0	0.000163444	0	0	6.00572e-05	0	0	0	0	0.00145747	0	0	0	0	0.000796502	0	0	0	3.87432e-05	0	0	0	0	0	0	4.61655e-05	0	0	0	0.0017275
Bacillus	0	6.82716e-05	0	0	2.31546e-05	0	0	0	0	0	0.000100324	0	0	0	0	8.64724e-05	0	4.75568e-05	0	0	0	0	0	0	0	0	0	0	8.26403e-05	0	0	0	0	0	0	0	5.22111e-05	0	0	0	0	2.36664e-05	1.81557e-05	0	0	0	0	0	0
Selenomonas	0	0	0	5.51119e-05	0	0	0	0.00138881	0.000867233	0	1.18028e-05	0	0	0	0	0	0	0	0	0	0.0001471	0	0.000105699	0	0	0	3.03407e-05	0.000252417	0	0	0	0	0	0	0	0	2.08845e-05	0	0	0.000269351	3.04783e-05	0	3.63115e-05	0	0	0	0	5.12978e-05	0
Neisseria	0	0	0.000755442	0	0	0	0	0.000127307	0	0	0	7.39057e-05	0	0	0	0	0	0	0	0	0.000163444	0	6.79497e-05	0	0	0	2.27555e-05	0	0	0	0.00013181	0	0	0	0	6.32138e-05	0	0	0	0	0	0	0	0	0	0	0	4.10383e-05	0
Parvimonas	0	0	0	2.7556e-05	0	0	0	0	0.000383196	0	0.000141634	0	0	0	0	0	2.3843e-05	0	0	0	0.00101335	0	0.000196299	0	0	0	0.00253345	0	0	0	0.00757308	0.000145064	0	0	0	0	0	0	0	0	3.04783e-05	0	0	6.5131e-05	0	0	0	0.000143634	0
Gordonibacter	0	0.000819259	0	0.000225959	0.000700426	0	0	0	0	2.16347e-05	0.00400706	0	0	0.000195773	0	0.000159641	0.000564285	0.000315064	0	0	0	0	0.000166099	0	0	0	0	0	0.000112691	0.000282619	0	0	0.000221502	6.92611e-05	0	0.000210713	4.17689e-05	0.000493975	0.000244827	0	0	0	0	0	0	0.000298019	0	0	0.000250363
Lactococcus	0	0.00439499	0	0	0	0	0	0	0	0	0	0.00629123	0	0	0.000121392	4.65621e-05	0	0	0	0	0	9.18112e-05	5.28497e-05	0	0	5.19895e-05	0	0	0	0	0	0	0	0	0	0	0	0	0.000126947	0	0	0	0	0.0259656	8.30979e-05	0	0	0	0.00116002
[Eubacterium]_brachy_group	0	0	0	0	0	0	0	0	0	0	0	0	0	0	0	0	0	0	0	0	0	0	0	0	0	0	0	0	0	0	0	0	0	0	0	0	0	0	0	0	0	0	0	0	0	0	0	0	0
TM7x	0	0.00174946	0.00030071	0.00403419	0	0	4.74714e-05	0.000196748	0	5.40868e-05	0.0041723	8.31439e-05	0.000229792	9.32253e-05	0.000212437	0.000106428	0.000143058	9.51135e-05	0	0	0.00219015	0	0.000332198	0	0	0	6.06815e-05	0.000581657	0.000210357	3.36451e-05	0.0948313	6.48969e-05	0	4.32882e-05	0	0	0.000219287	9.68579e-05	0.000652872	0.000202013	0.00117341	0.000181442	0.000118012	0	0	0.000127723	0.000133411	0.000789987	0
Prevotellaceae_Ga6A1_group	0	0	0	0	0	0	0	0	0	0	0	0	0	0	3.03481e-05	0	0	0	0	0	0	0	0	0	0	0	0	0	0	0	0	0	0	0	0	0	0.000114865	0	0.000108812	0	0	0	0	0	0	0	0	0	0
Chryseobacterium	0	0	0	0	0	0	0	0	0	0	0	0	0	0	0	0	0	0	0	0	0	0	0	0	0	0	0	0	0	0	3.59482e-05	0	0	0	0	0	0	0	0	0	0	0	0	0	0	0	0	0	0
[Ruminococcus]_gauvreauii_group	0	0	0	0	0	0	0	0	0	0	0	0	0	0	0	0	0	0	0	0	0	0	0	0	0	0	0	0	0	0	0	0	0	0	0	0	0	0	0	0	0	0	0	0	0	0	0	0	0
Campylobacter	0	0	2.20032e-05	0	0	0	0	0.000289335	0	0	0	0	0	0	0	0	3.97384e-05	0	0	0	0.000114411	0	0	0	0	0	8.3437e-05	0	0	2.69161e-05	4.79309e-05	0	0	0	0	0	0	0	0	0	0.000373359	0	5.44672e-05	0	0	0	0	0	0
GCA-900066575	0	0	0	0	0	0	0	0	0	0.000151443	0	0.000221717	0	0	0	0	0	1.78338e-05	0	0	0	0	0	0	0	0	0.000242726	0	0.000180306	0.00151403	0	0	0	0	0	0.000115892	0.000156633	0	0	0	0	0	0	0	0	0	0	0	0.000225327
Mogibacterium	0	0.000153611	0	0.000159825	4.63092e-05	0	0	8.10138e-05	0.00227901	0	0.000129831	5.54293e-05	0.000150248	0.000233063	0	7.31689e-05	7.15291e-05	0	0	0	0.000310544	0	8.30496e-05	0	0	0	0.0006144	0	0	0	0.00326529	0.000374111	0	2.59729e-05	0	0	0	1.93716e-05	5.4406e-05	4.48919e-05	5.3337e-05	3.15552e-05	0	0.000108552	0	2.55445e-05	0.000133411	8.20765e-05	0
Enterorhabdus	0	0	0	0	0	0	0	0	0	0	0	0.00263289	0	0	0	0	0	0	0	0	0	0	0	0	0	0	0	0	0.000165281	0	0	0	0	0	0	0	0	0	0	0	0	0	0	0	0	0	0	0	0
Saccharopolyspora	0	0	0	0	0	0	0	0	0	0	0	0	0	0	0	0	0	0	0	0	0	0	0	0	0	0	0	0	0	0	0	0	0	0	0	0	0	0	0	0	0	0	0	0	0	0	0	0	0
Paracoccus	0	0	0	0	0	0	0	0	0	0	0	0	0	0	0	0	0	0	0	0	0	0	0	0	0	0	0	0	0	0	0	0	0	0	0	0	0	0	0	0	0	0	0	0	0	0	0	0	0
Anaerofilum	0	0.000486435	0	0	1.73659e-05	0	0	0	0	0	0.000283268	0	0	0	0	9.97758e-05	0	0	0	0	0	0	0	0	0	0	0.000106193	0	9.76658e-05	0	0	0	0	5.19458e-05	0	0	0	0	0	0	0	0	0	0	0	0	0	0	0.000108491
Christensenella	0	7.68056e-05	0	0	0.000445726	0	0	0	0	0	0	0	0	7.45803e-05	0	0	0	0.000101058	0	0.000188594	0	0	0	0	0	0	0	0	0	0	0	0	0	9.5234e-05	0	0	0.000104422	0.00030026	8.1609e-05	0	0	0	0	0	5.53986e-05	0	0	0	0.00020029
Anaerococcus	0	0	0	6.61343e-05	0.000619385	0	0	0	0	0	0.000118028	0	0	0	0	0	0.000460965	0	0	0	0	0	0	0	0	0	0	0	0	7.40192e-05	0	0	0	0	0	0	0	0	0	0	0	0	0	5.06575e-05	0	0.000102178	0	0	3.33817e-05
Frisingicoccus	0	7.68056e-05	0	0	0	0	0	0	0	0	0	0	0	0	0	2.66069e-05	0	0	0	0	0	0	0	0	0	0	0	0	0	0	0	0	0	0.000190468	0	0	0	0.00066832	0	0	0	0	0	0	0	0	0	0	0
Comamonas	0	0	0	0	0	0	0	0	0	0	0	0	0	0	0	0	0	0	0	0	0	0	0	0	0	0	0	0	0	0	0	0	0	0	0	0	0	0	0	0	0	0	0	0	0	0	0	0	0
Succinivibrio	0	0	0	0	0	0	0	0	0	0	0	0	0	0	0	0	0	0	0	0	0	0	0	0	0	0	0	0	0	0	0	0	0	0	0	0	0	0	0	0	0	0	0	0	0	0	0	0	0
Oribacterium	0	0	0	4.40895e-05	0	0	4.74714e-05	0	0	0	0	0	0	0	9.10443e-05	0	0	0	0	0	0.00033506	0	0	0	0	0	0	0.000115234	0	0	0.000982583	1.14524e-05	0	0	0	0	0	0	0	0	0.000281924	0	0	5.78942e-05	0	0	0	0.000194932	0
Peptostreptococcus	0	0	0	1.10224e-05	0	0	2.37357e-05	0	0.000544541	0	0	4.61911e-05	0	5.59352e-05	0.000242785	0	0	0	0.0062542	0	0.000604743	0.000856905	0.000196299	0	0.0362007	0	0.000713007	0	0	0.0002086	0.0147268	0.000488635	8.86006e-05	0	0	6.32138e-05	0	0	0	0	6.09566e-05	0	0	0.00769993	0.000498587	0	0	9.23361e-05	0
Erysipelotrichaceae_UCG-006	0	0	0	0	0	0	0	0	0	0	0	0	0	0	0	0	0	0	0	0	0	0	0	0	0	0	0	0	0	0	5.39222e-05	0	0	0	0	0	0	0	0	0	0	0	0	0	0	0	0	0	0
Leuconostoc	0	0.000230417	0	0	0.000497823	0	0	0	0	0	4.13099e-05	0.00401862	0	0	0.000591788	2.66069e-05	0	0	0	0	0	0.000336641	6.03997e-05	0	0	0.000121309	0	0	0	0	0	8.01667e-05	0	0	0	0	9.39801e-05	0	0.000145083	0	0	0	0.00029957	0	0	0	0	0	0
Synergistes	0	0	0	0	0	0	0	0	0	0	0	0	0	0	0	0	0	0	0	0	0	0	0	0	0	0	5.30963e-05	0	0	0	0	0	0	0	0	0	0	0	0	0	0	0	0	0	0	0	0	0.000205191	0
Prevotellaceae_UCG-003	0	0	0	0	0	0	0	0	0	0	0	0	0	0	0	0	0	0	0	0	0	0	0	0	0	0	0	0	0	0	0	0	0	0	0	0	0	0	0	0	0	0	0	0	0	0	0	0	0
Cellulosilyticum	0	0	0	0	0	0	0	0	0	0	0	0	0.0270977	0	0	0	0	0	0	0	0	0	0	0	0	0	0	0	0	0	0	0	0	0	0	0	0	0	0	0	0	0	0	0	0	0	0	0	0
CHKCI002	0	0	0	0	0	0	0	0	0	0	0	0	0	0	0	0	0	0	0	0	0	0	0	0	0	0	0.000136533	0	0	0	0	0	0	0	0	0	0	0	0	0	0	0	0	0	0	0	0	0	4.17272e-05
Paludicola	0	0.000196281	0	0	0	0	0	0	0	0	9.44226e-05	0	0	3.72901e-05	0	2.66069e-05	0	2.37784e-05	0	0	0	0	0	0	0	0	0	0	0	2.69161e-05	0	0	0	8.65763e-05	0	0	0	0.000280888	4.53383e-05	0	0	0	0	0	0	0	0	0	9.17998e-05
Novosphingobium	0	0	0	0	0	0	0	0	0	0	0	0	0	0	0	0	0	0	0	0	0	0	0	0	0	0	0	0	0	0	0	0	0	0	0	0	0	0	0	0	0	0	0	0	0	0	0	0	0
Butyrivibrio	0	0	0	0	0	0	0	0	0	0	0	0	0	0	0	0	0	0	0	0	0	0	0	0	0	0	0	0	0.0150856	0	0.000509266	0	0	0	0	0	0	0	0	0	0	0	0	0	0	0	0	0	0
Massilia	0	0	0	0	0	0	0	0	0	0	0	0	0	0	0	0	0	0	0	0	0	0	0	0	0	0	0	0	0	0	0.000653058	0	0	0	0	0	0	0	0	0	0	0	0	0	0	0	0	0	0
Lachnospiraceae_UCG-010	0	0	0	0	0	0	0	0	0	0.000378608	0	0	0	0	0	0	0	0	0	0	0	0	0	0	0	0	6.82666e-05	0	0.000150255	3.36451e-05	0	0	0.000327822	0	0	0	0	0	0	0	0	0	0	0	0	0	0	0	0
Anaeroglobus	0	0	0.000161357	0.00013778	0	0	0	0.000173601	0	0	0	0	0	0	0	0	0	2.37784e-05	0	0	0.00055571	0	0	0	0	0	0	3.2924e-05	0	0	0.00407413	6.48969e-05	0	0	0.00184434	0	0	0	0	0.00108863	0	0	0	0	0	0	0	7.1817e-05	0
Rheinheimera	0	0	0	0	0	0	0	0	0	0	0	0	0	0	0	0	0	0	0	0	0	0	0	0	0	0	0	0	0	0	0	0	0	0	0	0	0	0	0	0	0	0	0	0	0	0	0	0	0
Phocea	0.000356808	0	0	0	0	3.74656e-05	0	0	0	6.49042e-05	0.00110947	0	0.000167925	4.66127e-05	0	0	0	1.18892e-05	0	0.000278791	0	0	0	0	0	0	9.86074e-05	0	0	0	0	0	0.000141761	4.32882e-05	0	0	0	2.90574e-05	0	0.00011223	0	0	0	0	0	0.000383168	0	0	0
Shuttleworthia	0	0	0	2.7556e-05	0	0.000106152	0	0	0	0	0	0	0.000848461	0	0	0	0	0	0	0	0	0	0	0	0	0	0	0	0.000172793	0	0.000161767	7.63493e-06	0	0	0	0	0	0	0	0	0	0	0	0	0	0	0	0	0
Paeniclostridium	0	7.68056e-05	0	0	0	0	0	0	0	0	0	0	0.00630159	0	0	0	0	0	0	0	0	0	0	0	0	0	0	0	0	0	0	0	0	0	0	0	0	0	0	0	0	0	0	0	0	0	0	0	0
Allorhizobium-Neorhizobium-Pararhizobium-Rhizobium	0	0	0	0	0	0	0	0	0	0	0	0	0	0	0	0	0	0	0	0	0	0	0	0	0	0	0	0	0	0	0	0	0	0	0	0	0	0	0	0	0	0	0	0	0	0	0	0	0
Deinococcus	0	0	0	0	0	0	0	0	0	0	0	0	0	0	0	0	0	0	0	0	0	0	0	0	0	0	0	0	0	0	0.00101254	0	0	0	0	0	0	0	0	0	0	0	0	0	0	0	0	0	0
Lachnospiraceae_UCG-008	0	0	0	0	0	0	0	0	0	0	0	0.000923822	0	0	0	0	0	0	0	0	0	0	0	0	0	0	0	0	0	0	0	0	0	0	0	0	0	0	0	0	0	0	0	0	0	0	0	0	0
Lachnospiraceae_NC2004_group	0	3.41358e-05	0	0	0	0	0	0	0	0.00016226	0.000236056	0.00180145	0	0	0	0	0	0	0	0	0	0	0	0	0	0	0	0	0.000277972	0	0	0	0	0.00113415	0	0	0.000668303	0	0	0	0	0	0	0	0	0	0	0	9.17998e-05
Peptoclostridium	0	0	0	0	0	0	0	0	0	0	0	0	0	0	0	0	0	0	0	0	0	0	0	0	0	0	0	0	0	0	0	0.000194691	0	0	0	4.21425e-05	0.000156633	0	0	0	0	0	0	0	0	0	0	0	0
Bulleidia	0	0	0	0	0	0	0	0	0	0	0	0	0	0	0	0	0	0	0	0	0	0	0	0	0	0	0	0	0	0	0.00336714	0	0	0	0	0	0	0	0	0	0	0	0	0	0	0	0	0	0
Brachybacterium	0	0	0	0	0	0	0	0	0	0	0	0	0	0	0	0	0	0	0	0	0	0	0	0	0	0	0	0	0	0	0	0	0	0	0	0	0	0	0	0	0	0	0	0	0	0	0	0	0
Blastomonas	0	0	0	0	0	0	0	0	0	0	0	0	0	0	0	0	0	0	0	0	0	0	0	0	0	0	0	0	0	0	0	0	0	0	0	0	0	0	0	0	0	0	0	0	0	0	0	0	0
Flavobacterium	0	0	0	0	0	0	0	0	0	0	0	0	0	0	0	0	0	0	0	0	0	0	0	0	0	0	0	0	0	0	0	0	0	0	0	0	0	0	0	0	0	0	0	0	0	0	0	0	0
Delftia	0	0	0	0	0	0	0	0	0	0	0	0	0	0	0	0	0	0	0	0	0	0	0	0	0	0	0	0	0	0	0	0	0	0	0	0	0	0	0	0	0	0	0	0	0	0	0	0	0
Sphingobacterium	0	0	0	0	0	0	0	0	0	0	0	0	0	0	0	0	0	0	0	0	0	0	0	0	0	0	0	0	0	0	0	0	0	0	0	0	0	0	0	0	0	0	0	0	0	0	0	0	0
Raoultibacter	0	0.000136543	0	0	0.000179448	0	0	0	0	0	0.000159338	0	0	6.52577e-05	0	5.98655e-05	0.000119215	1.18892e-05	0	0	0	0	0	0	0	0	0	0	4.50765e-05	0	0	0	0	7.79187e-05	0	0.000158034	5.22111e-05	0	0.000262962	0	0	0	0	0	0.000212361	0	0	0	0.000133527
Coprobacillus	6.69016e-05	0	0	0	3.47319e-05	4.37098e-05	0	0	0	0	0	0	0.000857299	0	0	0	0	0	0	0.000139396	0	0	0	0	0	0	0	0	0	0	0	0	0	0	0	0	0	0	0	0.0011223	0	0	0	0	0	0.000996236	0	0	0
Stenotrophomonas	0	0	0	0	0	0	0	0	0	0	0	0	0	0	0	0	0	0	0	0	0	0	0	0	0	0	0	0	0	0	0	0	0	0	0	0	0	0	0	0	0	0	0	0	0	0	0	0	0
Fournierella	0.000122653	0	0	0	0	0	0	0	0	0	0	0.000369529	0	0	0	0	0	0	0	0	0	0	0	0	0	0	0	0	0	0	0	0	0	0	9.56971e-05	0	0	0	0	0	0	0	0	0	0	5.96039e-05	0	0	0
Epulopiscium	0	0	0	0	0	0	0	0	0	0	0	0	0	0	0	0	0	0	0	0	8.1722e-05	0	0	0	0	0	0	0	0	0	0	0	0	0	0	0	0	0	0	0	0	0	0	0	0	0	0.000123881	0	0
Mailhella	0	0	0	0	0	0	0	0	0	0	0	0	0	0	0	0	0	0	0	0	0	0	0	0	0	0	0	0	0	0	0	0	0	0	0	0	0.000501227	0	0	0	0	0	0	0	0	0	0	0	0
Victivallis	0	0	0	0	2.89432e-05	0	0	0	0	0.000129808	0.000861606	0	0	0	0	2.66069e-05	0.000166901	0	0	0	0	0	0	0	0	0	0.000250311	0	0.00201342	0	0	0	0	0.00484827	0	0	0.000135749	0	0	0	0	0	0	0	0	0	0	0	0.000375545
Brochothrix	0	0	0	0	0	0	0	0	0	0	0	0	0	0	0	0	0	0	0	0	0	0	0	0	0	0	0	0	0	0	0	0	0	0	0	0	0	0	0	0	0	0	0	0	0	0	0	0	0
[Eubacterium]_fissicatena_group	0	0	0	0	0	0	0	0	0	0	0	0	0	0	0	0	0	0	0	0	0	0	0	0	0	0	0	0	0	0	0	0	0	0	0	0	0	0	0	0	0	0	0	0	0	0	0	0	0
Acetanaerobacterium	0	0	0	0	0	1.87328e-05	0	0	0	0	0	0	0	0	0	0	8.74244e-05	2.37784e-05	0	0	4.0861e-05	0	0	0	0	0	0	0	0	0	0	0	0	0	0	0	0	8.71721e-05	4.53383e-05	0	0	0	0	0	0	0	0	0	0
Anaerofustis	0	4.26698e-05	0	0	0	0	0	0	0	0	2.95071e-05	0	0	0	0	0	0	6.53906e-05	0	4.09987e-05	0	0	3.01998e-05	0	0	0	0	0	0	9.42063e-05	0	0	1.77201e-05	0	0	0	0	7.74863e-05	0.000281098	0	0	0	0	0	0	0	0	0	0.000125182
Anaerostignum	0	0	0	0	0	0	0	0	0	0	0	0	0	0	0	0	0	0	0	0	0	0	0	0	0	0	0	0	0	0	0	0	0	0	0	0	0	0	0	0	0	0	0	0	0	0.000102178	0	0	5.8418e-05
Merdibacter	0	0	0	0	0	0	0	0	0	0	0	0	0	0	0	0	0	0	0	0	0	0	0	0	0	0	0.000128948	0	0	0	0	0	0	0	0	0	0	0	0	0	0	0	0	0	0	0	0	0	2.50363e-05
Catabacter	0	0	2.20032e-05	0	8.68297e-05	0	0	0	0	0	0	0	0	0	0	0	0	0	0	4.91985e-05	4.0861e-05	0	0	0	0	0	0	0	9.0153e-05	0	0	0	0	0	0	4.21425e-05	0.000313267	0	0	0	0	0	0	0	0	0	0	0	0.000141872
Janibacter	0	0	0	0	0	0	0	0	0	0	0	0	0	0	0	0	0	0	0	0	0	0	0	0	0	0	0	0	0	0	0	0	0	0	0	0	0	0	0	0	0	0	0	0	0	0	0	0	0
Methanosphaera	0	0	0	0	0	0	0	0	0	0	0	0	0	0	0	0	0	0	0	0	0	0	0	0	0	0	0	0	0	0	0	1.14524e-05	0	0	0	0	0	0	0	0	0	0	0	0	0	0	0	0	0
Paraeggerthella	0	0	0	0	0	0	0	0	0	0	0	0	0	0	0	0	0	0	0	0	0	0	0.000181199	0	0	0	6.06815e-05	0	0	0	0	0	0	0	0	0	0	0	0	0	0	0	0	0	0	0	0	0	0
Clostridioides	0	0	0	0	0	0	0	0	0	0	0	0	0.00110477	0	0	0	0	0	0	0	0	0	0	0	0	0	0	0	0	0	0	0	0	0	0	0	0	0	0	0.00411883	0	0	0	0	0	0.000178812	0	0	0
Faecalicoccus	0	0	0	0	0	0	0	0	0	0	0	0	0	0	0	0	0	0	0	0	0	0	0	0	0	0	0	0	0	0	0	0	0	0	0.0573139	0	0	0	0	0	0	0	0	1.44736e-05	0	0	0	0	0
Sanguibacteroides	0	0	0	0	0	0	0	0	0	0	0	0	0	0	0	0	0	0	0	0	0	0	0	0	0	0	4.55111e-05	0	0.000488329	0	0	0	0	0	0	0	0.000135749	0	0	0	0	0	0	0	0	0	0	0	0.000308781
Johnsonella	0	0	0	0	0	0	0	0	0	0	0	0	0	0	0	0	0	0	0	0	6.53776e-05	4.59056e-05	3.01998e-05	0	0	0	0	0	0	0	0	0	0	0	0	0	0	0	0	0	0	0	0	0	0	0	0	0	0
Hydrobacter	0	0	0	0	0	0	0	0	0	0	0	0	0	0	0	0	0	0	0	0	0	0	0	0	0	0	0	0	0	0	0	0	0	0	0	0	0	0	0	0	0	0	0	0	0	0	0	0	0
Cupriavidus	0	0	0	0	0	0	0	0	0	0	0	0	0	0	0	0	0	0	0	0	0	0	0	0	0	0	0	0	0	0	0	0	0	0	0	0	0	0	0	0	0	0	0	0	0	0	0	0	0
Cloacibacterium	0	0	0	0	0	0	0	0	0	0	0	0	0	0	0	0	0	0	0	0	0	0	0	0	0	0	0	0	0	0	0	0	0	0	0	0	0	0	0	0	0	0	0	0	0	0	0	0	0
Murdochiella	0	0	0	0	0	0	0	0	0	0	0	0	0	0	0	0	1.58953e-05	0	0	0	0	1.53019e-05	0	0	0	0	0	0	0	7.40192e-05	0.0027021	0	0	0	0	0	0	0	0	0	0	0	0	0	0	0	0	5.12978e-05	0
Sneathia	0	0	0	0	0	0	0	0	0	0	0	0	0	0	0	0	0	0	0	0	0	0	0	0	0	0	0	0	0	0	0	0	0	0	0	0	0	0	0	0	0	0	0	0	0	0	0	0	0
Bosea	0	0	0	0	0	0	0	0	0	0	0	0	0	0	0	0	0	0	0	0	0	0	0	0	0	0	0	0	0	0	0	0	0	0	0	0	0	0	0	0	0	0	0	0	0	0	0	0	0
Lawsonella	0	0	0	0	0	0	0	0	0	0	0	0	0	0	0	0	4.7686e-05	0	0	0	6.53776e-05	0	0	0	0	0	0	0	0	0	0	0	0	0	0	0	0	0	0	0	0	0	0	0	0	0	0	0.000359085	0
Capnocytophaga	0	0	0	0	0	0	0	0	0	0	0	0	0	0	0	0	0	0	0	0	0	0	0	0	0	0	0	0	0	0	0	0	0	0	0	0	0	0	0	0	0.000380979	0	0	0	0	0	0	0	0
CAG-873	0	0	0	0	0	0	0	0	0	0	0	0	0	0	0	0	0	0	0	0	0	0	0	0	0	0	0	0	0	0	0	0	0	0	0	0	0	0	0	0	0	0	0	0	0	0	0	0	0
Treponema	0	0	0	0	0	0	0	0	0	0	0	0	0	0	0	0	0	0	0	0	0	0	0	0	0	0	0	0	0	0	0	0	0	0	0	0	0	0	0	0	0	0	0	0	0	0	0	0	0
Thermus	0	0	0	0	0	0	0	0	0	0	2.36056e-05	0	0	0	0	0	0	0	0	0	0	0	0	0	0	0	0	0	0	0	0	0	0	0	0	0	0	0	0	0	0	0	0	0	0	0	0	0	0
Scardovia	0	0	0	0	0	0	0	0	0	0	0	0	0	0	0	0	0	0	0	0	0	0	0	0	0	0	0	0	0	0	0	0	0	0	0	0	0	0	0	0	0	0	0	0	0	0	0	0	0
Aggregatibacter	0	0	0	0	0	0	0	0	0	0	0	0	0	3.72901e-05	0	0	0	0	0	0	0.000784532	0	0	0	0	0	7.58518e-05	0	0	0	0.000185732	0	0	0	0	0	0	0	0	0	0	0	7.2623e-05	0	0	0	0	0	0
Thermomonas	0	0	0	0	0	0	0	0	0	0	0	0	0	0	0	0	0	0	0	0	0	0	0	0	0	0	0	0	0	0	0	0	0	0	0	0	0	0	0	0	0	0	0	0	0	0	0	0	0
Kocuria	0	0	0	0	0	0	0	0	0	0	0	0	0	0	0	0	0	0	0	0	0	0	0	0	0	0	0	0	0	0	0	0	0	0	0	0	0	0	0	0	0	0	0	0	0	0	0	0	0
Acidibacter	0	0	0	0	0	0	0	0	0	0	0	0	0	0	0	0	0	0	0	0	0	0	0	0	0	0	0	0	0	0	0	0	0	0	0	0	0	0	0	0	0	0	0	0	0	0	0	0	0
Vagococcus	0	0	0	0	0	0	0	0	0	0	0	0	0	0	0	0	0	0	0	0	0	0	0	0	0	0	0	0	0	0	0	0	0	0	0	0	0	0	0	0	0	0	0	0	0	0	0	0	0
Dietzia	0	0	0	0	0	0	0	0	0	0	0	0	0	0	0	0	0	0	0	0	0	0	0	0	0	0	0	0	0	0	0	0	0	0	0	0	0	0	0	0	0	0	0	0	0	0	0	0	0
Dysgonomonas	0	0	0.0100775	0	0	0	0	0	0	0	0	0	0.0105881	0	0.00015174	0	0	0	0	0	0	0	0	0	0	0	0	0	0	0	0	0	0	0	0	0	0	0	0	0	0	0	0	0	0	0	0	0	0
Pedobacter	0	0	0	0	0	0	0	0	0	0	2.95071e-05	0	0	0	0	0	0	0	0	0	0	0	0	0	0	0	0	0	0	0	0	0	0	0	0	0	0	0	0	0	0	0	0	0	0	0	0	0	0
Providencia	0	0	0	0	0	0	0	0	0	0	0	0	0	0	0	0	0	0	0	0	0	0	0	0	0	0	0	0	0	0	0	0	0	0	0	0	0	0	0	0	0	0	0	0	0	0	0	0	0
UC5-1-2E3	0	0	0	0	0	0	0	0	0	0	0	0	0.0133368	0	0	0	0	0	0	0	0	0	0	0	0	0	0	0	0	0	0	0	0	0	0	0	0	0	0.00015415	0	0	0	0	0	0	0	0	0	0
Phreatobacter	0	0	0	0	0	0	0	0	0	0	0	0	0	0	0	0	0	0	0	0	0	0	0	0	0	0	0	0	0	0	0	0	0	0	0	0	0	0	0	0	0	0	0	0	0	0	0	0	0
Finegoldia	0	0	0	0	0.000434148	0.000187328	0	0	0	0	5.90141e-05	0	0	0	3.03481e-05	1.99552e-05	0.000174849	0	0	0	5.72054e-05	0	0	0	0	0	0	0	0	0.000235516	4.79309e-05	0	0	0	0	0	4.17689e-05	0	0	0	0	0	0	0.000231577	0	0	0	0	0
Aeromonas	0	0	0.000975474	0	0	0	0	0	0	0	0	0	0.000220953	0	0	0	0	0	0	0	0	0	0	0	0	0	0	0	0	0	0	0	0	0	0	0	0	0	0	0	0	0	0	0	0	0	0	0	0
Paenibacillus	0	0	0	0	0	0	0	0	0	0	0	0	0	0	0	0	0	0	0	0	0	0	0	0	0	0	0	0	0	0	0	0	0	0	0	0	0	0	0	0	0	0	0	0	0	0	0	0	0
Harryflintia	0	0	0	0	0	0	0	0	0	2.16347e-05	0.000241958	0	0	0	0	0	0	0	0	0	0	0	0	0	0	0	0	0	0	0	0	0	0	0	0	0	0	0	0	0	0	0	0	0	0	0	0	0	0
Sarcina	0	0	0	0	0	0	0	0	0	0	0	0	0	0	0	0	0	0	0	0	0.000130755	0	0	0	0	0	0	0	0	0	0	0	0	0	0	0	0.00378009	0	0	0	0	0	0	0	0	0	0	0	0
Oscillospira	0	0	0	0	0	0	0	0	0	0	0	0	0	0	0	0	0	0	0	0	0	0	0	0	0	0	0	0	0.00495842	0	0	0	0	0	0	0	0	0	0	0	0	0	0	0	0	0	0	0	0
W5053	0	0	0	0	0	0	0	0	0	0	0	0	0	0	0	0	0	0	0	0	0	0	0	0	0	0	0	0	0	0	0	0	0	0	0	0	0	0	0	0	0	0	0	0	0	0	0	0	0
Enorma	0	0	0	0	0	0	0	0	0	0	0	0	0	0	0	0	0	0	0	0	0	0	0	3.60343e-05	0	0	0	0	0	0	0	0	0	0	0	0	0	0	0	0	0	0	0	0	0	0	0	0	0
Stomatobaculum	0	0	0	0	0	0	0	3.47202e-05	0.000302523	0	0	0	0	0	0	0	0	0	0	0	0	0	0	0	0	0	0	7.68226e-05	0	0	4.19395e-05	0	0	0	0	0	0	0	0	0	0	0	0	0	0	0	0	0	0
Micrococcus	0	0	0	0	0	0	0	0	0	0	0	0	0	0	0	0	0	0	0	0	0	0	0	0	0	0	0	0	0	0	0	0	0	0	0	0	0	0	0	0	0	0	0	0	0	0	0	0	0
TM7a	0	0	0	0	0	0	0	0	0	0	0	0	0	0	0	0	0	0	0	0	0	0	0	0	0	0	0	0	0	0	0	0	0	0	0	0	0	0	0	0	0	0	0	0	0	0	0	0	0
Mycoplasma	0	0	0	0	0	0	0	0	0	0	0	0	0	0	0	0	0	0	0	0	0	0	0	0	0	0	0	0	0	0	0	0	0	0	0	0	0	0	0	0	0	0	0	0	0	0	0	0	0
Cardiobacterium	0	0	0	0	0	0	0	0	0	0	3.54085e-05	0	0	0	0	0	0	0	0	0	7.35498e-05	0	0	0	0	0	0	0	0	0	0	0	0	0	0	0	0	0	0	0	9.90544e-05	0	0	0	0	0	0	0	0
Lachnoanaerobaculum	0	0	0	0	0	0	0	0	0.000403364	0	0	0.000120097	0	0	0	0	0	0	0	0	6.53776e-05	0	3.01998e-05	0	0	0	0	1.6462e-05	0	0	0.000191724	7.63493e-06	0	0	0	0	0	0	0	0	7.61957e-05	0	0	0.0012592	0	0	0	6.15574e-05	0
Negativicoccus	0	0	0	0	0	0	0	0	0	0	0	0	0	0	0	0	0	0	0	0	0	0	0	0	0	0	0	0	0	0	0	0	0	0	0	0	0	0	0	0	0	0	0	0	0.000138496	0	0	0	0
Papillibacter	0	0	0	0	0	0	0	0	0	0	0	0	0	0	0	3.99103e-05	0	0	0	0	0	0	0	0	0	0	0	0	2.25383e-05	0	0	0	0	0	0	0	0	0	0	0	0	0	0	0	0	0	0	0	0
Erythrobacter	0	0	0	0	0	0	0	0	0	0	0	0	0	0	0	0	0	0	0	0	0	0	0	0	0	0	0	0	0	0	0	0	0	0	0	0	0	0	0	0	0	0	0	0	0	0	0	0	0
Allobaculum	0	0	0	0	0	0	0	0	0	0	0	0	0	0	0.000531092	0	0	0	0	0	0	0	0	0	0	0	0	0	0	0	0	0.000553532	0	0	0	0.000179106	0	0	3.62707e-05	0	0	0	0	0	0	0	0	0	0
Globicatella	0	0	0	0	0	0	0	0	0	0	0	0	0	0	0	0	0	0	0	0	0	0	0	0	0	0	0	0	0	0	0	0	0	0	0	0	0	0	0	0	0	0	0	0	0	0	0	0	0
Tuzzerella	0	0	0	0	0	0	0	0	0	0	0	0	0	0	0	0	0	0	0	0	0	0	0	0	0	0	0	0	5.25893e-05	0	0	0	0	0	0	0	0	0	0	0	0	0	0	0	0	0	0	0	0
Fretibacterium	0	0	0	0	0	0	0	0	0	0	0	0	0	0	0	0	0	0	0	0	0.00081722	0	0	0	0	0	4.55111e-05	0	0	0	3.59482e-05	0	0	0	0	0	0	0	0	0	0	0	0	0	0	0	0	0	0
Pediococcus	0	0	0	0	0	0	0	0	0	0	0	0	0	0	0	0	0	0	0	0	0	0	0	0	0	0	0	0	0	0	0	0	0	0	0	0	0	0	0	0	0	0	0	0	0	0	0	0	0
Nocardioides	0	0	0	0	0	0	0	0	0	0	0	0	0	0	0	0	0	0	0	0	0	0	0	0	0	0	0	0	0	0	6.5905e-05	0	0	0	0	0	0	0	0	0	0	0	0	0	0	0	0	0	0
Candidatus_Cardinium	0	0	0	0	0	0	0	0	0	0	0	0	0	0	0	0	0	0	0	0	0	0	0	0	0	0	0	0	0	0	0	0	0	0	0	0	0	0	0	0	0	0	0	0	0	0	0	0	0
Marvinbryantia	0	0	0	0	0	0	0	0	0	0.000454329	0	0.00010162	0	0	0	0	0	0	0	0	0	0	0	0	0	0	0	0	0.000142742	0	0	0	0	0	0	0	0	0	0	0	0	0	0	0	5.53986e-05	0	0	0	0.000175254
Acetitomaculum	0	0	0	0	0	0	0	0	0	0	0	0	0	0	0	0	0	0	0	0	0	0	0	0	0	0	0	0	0	0	0	0	0	0	0	0	0	0	0	0	0	0	0	0	0	0	0	0	0
Geobacillus	0	0	0	0	0	0	0	0	0	0	5.31127e-05	0	0	0	0	0	0	0	0	0	0	0	0	0	0	0	0	0	0	0	0	0	0	0	0	0	0	0	0	0	0	0	0	0	0	0	0	0	0
UCG-004	0	0	0	0	0	0	0	0	0	0	0	0	0	0	0	0	0	0	0	0	0	0	0	0	0	0	0	0	2.25383e-05	0	0	0	0	0	0	0	0	0	0	0	0	0	0	0	0	0	0	0	0.000150218
Eggerthia	0	0	0	0	0	0	0	0	0	0	0	0	0	0	0	0	0	0	0	0	0	0	0	0	0	0	0	0	0	0	0.000287585	0	0	0	0	0	0	0	0	0	0	0	0	0	0	0	0	0	0
Pseudonocardia	0	0	0	0	0	0	0	0	0	0	0	0	0	0	0	0	0	0	0	0	0	0	0	0	0	0	0	0	0	0	0	0	0	0	0	0	0	0	0	0	0	0	0	0	0	0	0	0	0
GCA-900066755	0	6.82716e-05	0	0	6.36751e-05	0	0	0	0	0	0	0	0	0	0	0	5.56337e-05	0	0	0	0	0	0	0	0	0	0	0	0	0	0	0	0	6.06034e-05	0	0	0	0.000135601	0	0	0	0	0	0	0	0	0	0	0.000492381
Coriobacteriaceae_UCG-002	0	0	0	0	0	0	0	0	0	0	0	0	0	0	0	0	0	0	8.30572e-05	0	0	0	0	0	0	0	0	0	0	0	0	0	0	0	0	0	0	0	0	0	0	0	0	0	0	0	0	0	0
Clostridium_sensu_stricto_13	0	0	0	0	0	0	0	0	0	0	0	0	0.00182949	0	0	0	0	0	0	0	0	0	0	0	0	0	0	0	0	0	0	0	0	0	0	0	0	0	0	0	0	0	0	0	0	0	8.57641e-05	0	0
Carnobacterium	0	0	0	0	0	0	0	0	0	0	0	0	0	0	0	0	0	0	0	0	0	0	0	0	0	0	0	0	0	0	0	0	0	0	0	0	0	0	0	0	0	0	0	0	0	0	0	0	0
Varibaculum	0	0	0	0	0	0	0	0	0	0	0	0	0	0	0	0	5.56337e-05	0	0	0	0	0	0	0	0	0	0	0	0	0	0	0	0	0	0	0	0	0	0	0	0	0	0	0	0	0	0	0	0
S5-A14a	0	0	0	0	0	0	0	0	0	0	2.36056e-05	0	0	0	0	0	8.74244e-05	0	0	0	3.26888e-05	0	0	0	0	0	0	0	0	0	0	0	0	0	0	0	0	0	0	0	0	0	0	0	0	0	0	0	0
Vogesella	0	0	0	0	0	0	0	0	0	0	0	0	0	0	0	0	0	0	0	0	0	0	0	0	0	0	0	0	0	0	0	0	0	0	0	0	0	0	0	0	0	0	0	0	0	0	0	0	0
Helicobacter	0	0	0	0	0	0	0	0	0	0	0	0	0	0	0	0	0	0	0	0	0	0	0	0	0	0	0	0	0	0	0	0	0	0	0	2.10713e-05	0	0	0	0	0	0	0	0	0	0	0	0	0
Paraclostridium	0	0	0	0	0	0	0	0	0	0	0	0	0	0	0	0	0	0	0	0	0	0	0	0	0	0	0	0	0	0	0	0	0	0	0	0	0	0	0	0	0	0	0	0	0	0	0	0	0
Caulobacter	0	0	0	0	0	0	0	0	0	0	0	0	0	0	0	0	0	0	0	0	0	0	0	0	0	0	0	0	0	0	0	0	0	0	0	0	0	0	0	0	0	0	0	0	0	0	0	0	0
Bergeyella	0	0	0	0	0	0	0	0	4.03364e-05	0	0	0	0	0	0	0	0	0	0	0	0	0	0	0	0	0	0	0	0	0	0	0	0	0	0	0	0	0	0	0	0	0	0	0	0	0	0	0	0
Catenibacillus	0	0	0	0	0	0	0	0	0	0	0	0	0	0	0	0	0	0	0	0	0	0	0	0	0	0	0	0	0	0	0	0	0	0	0	0	0	0	0.000163218	0	0	0	0	0	0	0	0	0	0
Moryella	0	0	0	0	0	0	0	0	0	0	0	0	0	0	0	0	0	0	0	0	0	0	0	0	0	0	0	0	0	0	4.79309e-05	0	0	0	0	0	0	0	0	0	0	0	0	0	0	0	0	3.07787e-05	0
Mobiluncus	0	0	0	0	0	0	0	0	0	0	0	0	0	0	0	0	0	0	0	0	0	0	0	0	0	0	0	0	0	8.74773e-05	0	0	0	0	0	0	0	0	0	0	3.04783e-05	0	0	0	0	0	0	0	0
Aerococcus	0	0	0	0	0	0	0	0	0	0	0	0	0	0	0	0	0	0	0	0	0	0	0	0	0	0	0	0	0	0	0	0	0	0	0	0	0	0	0	0	0	0	0	0	0	0	0	0	0
Lautropia	0	0	0	0	0	0	0	0	0	0	0	2.77146e-05	0	0	0	0	0	0	0	0	0	2.29528e-05	0	0	0	0	0	0	0	0	0	0	0	0	0	0	0	0	0	0	0.000312402	0	0	0	0	0	0	0	0
Cutibacterium	0	0	0	0	0	0	0	0	0	0	0	0	0	0	0	0	0	0	0	0	0	0	0	0	0	0	0	0	0	0	0	0	0	0	0	0	0	0	0	0	0	0	0	0	0	0	0	0	0
Lysinibacillus	0	0	0	0	0	0	0	0	0	0	0	0	0	0	0	0	0	0	0	0	0	0	0	0	0	0	0	0	0	0	0	0	0	0	0	0	0	0	0	0	0	0	0	0	0	0	0	0	0
Succinatimonas	0	0	0	0	0	0	0	0	0	0	0	0	0	0	0	0	0	0	0	0	0	0	0	0	0	0	0	0	0	0	0	0	0	0	0	0	0	0	0	0	0	0	0	0	0	0	0	0	0
Fastidiosipila	0	0	0	0	0	0	0	0	0	0	0	0	0	0	0	0	0	0	0	0	0	0	0	0	0	0	0	0	0	0	0	0	0	0	0	0	0	0	0	0	0	0	0	0	0	0	0	0	0
Microbacterium	0	0	0	0	0	0	0	0	0	0	0	0	0	0	0	0	0	0	0	0	0	0	0	0	0	0	0	0	0	0	0	0	0	0	0	0	0	0	0	3.36689e-05	0	0	0	0	0	0	0	0	0
Lysobacter	0	0	0	0	0	0	0	0	0	0	0	0	0	0	0	0	0	0	0	0	0	0	0	0	0	0	0	0	0	0	0	0	0	0	0	0	0	0	0	0	0	0	0	0	0	0	0	0	0
Prauserella	0	0	0	0	0	0	0	0	0	0	0	0	0	0	0	0	0	0	0	0	0	0	0	0	0	0	0	0	0	0	0	0	0	0	0	0	0	0	0	0	0	0	0	0	0	0	0	0	0
Candidatus_Saccharimonas	0	0	0	0	0	0	0	0	0	0	0	0	0	0	0	0	0	0	0	0	0	0	0	0	0	0	0	0	0	0	0.000754911	0	0	0	0	0	0	0	0	0	0	0	0	0	0	0	0	0	0
Luteimonas	0	0	0	0	0	0	0	0	0	0	0	0	0	0	0	0	0	0	0	0	0	0	0	0	0	0	0	0	0	0	0	0	0	0	0	0	0	0	0	0	0	0	0	0	0	0	0	0	0
Elusimicrobium	0	0	0	0	0	0	0	0	0	0	0	0	0	0	0	0	0	0	0	0	0	0	0	0	0	0	0	0	0	0	0	0	0	0	0	0	0	0	0	0	0	0	0	0	0	0	0	0	0
Rickettsia	0	0	0	0	0	0	0	0	0	0	0	0	0	0	0	0	0	0	0	0	0	0	0	0	0	0	0	0	0	0	0	0	0	0	0	0	0	0	0	0	0	0	0	0	0	0	0	0	0
Glutamicibacter	0	0	0	0	0	0	0	0	0	0	0	0	0	0	0	0	0	0	0	0	0	0	0	0	0	0	0	0	0	0	0	0	0	0	0	0	0	0	0	0	0	0	0	0	0	0	0	0	0
Gardnerella	0	0	0	0	0	0	0	0	0	0	0	0	0	0	0	0	0.000540442	0	0	0	0	0	0	0	0	0	0	0	0	0	0	0	0	0	0	0	0	0	0	0	0	0	0	0	0	0	0	0.000738689	0
Ruminiclostridium	0	0	0	0	0	0	0	0	0	9.73562e-05	0	0	0	0	0	0	0	0	0	0	0	0	0	0	0	0	0	0	3.0051e-05	0	0	0	0	0	0	0	0	0	0	0	0	0	0	0	0	0	0	0	0.00029209
Sphingobium	0	0	0	0	0	0	0	0	0	0	0	0	0	0	0	0	0	0	0	0	0	0	0	0	0	0	0	0	0	0	0	0	0	0	0	0	0	0	0	0	0	0	0	0	0	0	0	0	0
Meiothermus	0	0	0	0	0	0	0	0	0	0	0	0	0	0	0	0	0	0	0	0	0	0	0	0	0	0	0	0	0	0	0	0	0	0	0	0	0	0	0	0	0	0	0	0	0	0	0	0	0
Hymenobacter	0	0	0	0	0	0	0	0	0	0	0	0	0	0	0	0	0	0	0	0	0	0	0	0	0	0	0	0	0	0	0.000431378	0	0	0	0	0	0	0	0	0	0	0	0	0	0	0	0	0	0
Leucobacter	0	0	0	0	0	0	0	0	0	0	0	0	0	0	0	0	0	0	0	0	0	0	0	0	0	0	0	0	0	0	0	0	0	0	0	0	0	0	0	0	0	0	0	0	0	0	0	0	0
Pseudoflavonifractor	0	0	0	0	0	0	0	0	0	0	0	0	0	0	0	0	0	0	0	0	0	0	0	0	0	0	0.000121363	0	0	0	0	0	0	0	0	0	0	0.000174344	0	0	0	0	0	0	0	0	0	0	0
Hydrogenophilus	0	0	0	0	0	0	0	0	0	0	0	0	0	0	0	0	0	0	0	0	0	0	0	0	0	0	0	0	0	0	5.99136e-05	0	0	0	0	0	0	0	0	0	0	0	0	0	0	0	0	0	0
F0332	0	0	0	2.20448e-05	5.20978e-05	0	0	0	6.05046e-05	0	2.95071e-05	0	0.000150248	0.000186451	0	9.31241e-05	8.74244e-05	1.18892e-05	0	0	0	6.88584e-05	0	0	0	0	0	0	0	0	2.99568e-05	0	0	0	0	0	0	0	0.00015415	0	0	0	3.63115e-05	0	0	0	0	6.15574e-05	0
Aerosphaera	0	0	0	0	0	0	0	0	0	0	0	0	0	0	0	0	0	0	0	0	0	0	0	0	0	0	0	0	0	0	0	0	0	0	0	0	0	0	0	0	0	0	0	0	0	0	0	0	0
Flexilinea	0	0	0	0	0	0	0	0	0	0	0	0	0	0	0	0	0	0	0	0	0	0	0	0	0	0	0	0	0	0	0	0	0	0	0	0	0	0	0	0	0	0	0	0	0	0	0	0	0
Rubellimicrobium	0	0	0	0	0	0	0	0	0	0	0	0	0	0	0	0	0	0	0	0	0	0	0	0	0	0	0	0	0	0	0.000185732	0	0	0	0	0	0	0	0	0	0	0	0	0	0	0	0	0	0
Tepidimonas	0	0	0	0	0	0	0	0	0	0	0	0	0	0	0	0	0	0	0	0	0	0	0	0	0	0	0	0	0	0	0	0	0	0	0	0	0	0	0	0	0	0	0	0	0	0	0	0	0
Rikenella	0	0	0	0	0	0	0	0	0	0	0	0	0	0	0	0	0	0	0	0	0	0	0	0	0	0	0	0	3.75638e-05	0	0	0	0	0	0	0	0	0	0	0	0	0	0	0	0	0	0	0	0.000100145
Flaviflexus	0	0	0	0	0	0	0	0	0	0	0	0	0	0	0	0	0	0	0	0	0	0	0	0	0	0	0	0	0	0	0	0	0	0	0	0	0	0	0	0	0	0	0	0	0	0	0	0	0
Haoranjiania	0	0	0	0	0	0	0	0	0	0	0	0	0	0	0	0	0	0	0	0	0	0	0	0	0	0	0	0	0	0	0	0	0	0	0	0	0	0	0	0	0	0	0	0	0	0	0	0	0
Aliterella	0	0	0	0	0	0	0	0	0	0	0	0	0	0	0	0	0	0	0	0	0	0	0	0	0	0	0	0	0	0	5.39222e-05	0	0	0	0	0	0	0	0	0	0	0	0	0	0	0	0	0	0
Cryptobacterium	0	1.70679e-05	0	0	0	0	0	0	0	0	0	0	0	0	0	0	0	0	0	0	3.26888e-05	0	0	0	0	0	0	0	0	0	4.19395e-05	7.63493e-06	0	0	0	0	0	0	0	0	0	0	0	0	0	0	1.90587e-05	0	0
[Bacteroides]_pectinophilus_group	0	0	0	0	0	0	0	0	0	0	0	0	0	0	0	0	0	0	0	0	0	0	0	0	0	0	0	0	0	0	0	0	0	0	0	0	0	0	0	0	0	0	0	0	0	0	0	0	0
Rhodococcus	0	0	0	0	0	0	0	0	0	0	0	0	0	0	0	0	0	0	0	0	0	0	0	0	0	0	0	0	0	0	0.000107844	0	0	0	0	0	0	0	0	0	0	0	0	0	0	0	0	0	0
Atopostipes	0	0	0	0	0	0	0	0	0	0	0	0	0	0	0	0	0	0	0	0	0	0	0	0	0	0	0	0	0	0	0	0	0	0	0	0	0	0	0	0	0	0	0	0	0	0	0	0	0
Dubosiella	0	0	0	0	0	0	0	0	0	0	0	0	0	0	0	0	0	0	0	0	0	0	0	0	0	0	0	0	0	0	0	0.000110706	0	0	0	8.42851e-05	0	0	0	0	0	0	0	0	0	0	0	0	0
Streptomyces	0	0	0	0	0	0	0	0	0	0	0	0	0	0	0	0	0	0	0	0	0	0	0	0	0	0	0	0	0	0	0	0	0	0	0	0	0	0	0	0	0	0	0	0	0	0	0	0	0
Propionibacterium	0	4.26698e-05	0	0	0	0	0	0	0.000504205	0	0	0	0	0	0	0	0	0	0	0	0	0	0	0	0	0	0	0	0	0	0.000341508	0	0	0	6.95979e-05	0	0	0	0	0	0	0	0	0	0	0	0	0	0
Proteiniphilum	0	0	0	0	0	0	0	0	0	0	0	0	0	0	0	0	0	0	0	0	0	0	0	0	0	0	0	0	0	0	0	0	0	0	0	0	0	0	0	0	0	0	0	0	0	0	0	0	0
Phytoactinopolyspora	0	0	0	0	0	0	0	0	0	0	0	0	0	0	0	0	0	0	0	0	0	0	0	0	0	0	0	0	0	0	0	0	0	0	0	0	0	0	0	0	0	0	0	0	0	0	0	0	0
Alcaligenes	0	0	0	0	0	0	0	0	0	0	0	0	0	0	0	0	0	0	0	0	0	0	0	0	0	0	0	0	0	0	0	0	0	0	0	0	0	0	0	0	0	0	0	0	0	0	0	0	0
Haematomicrobium	0	0	0	0	0	0	0	0	0	0	0	0	0	0	0	0	0	0	0	0	0	0	0	0	0	0	0	0	0	0	0	0	0	0	0	0	0	0	0	0	0	0	0	0	0	0	0	0	0
[Eubacterium]_saphenum_group	0	0	0	0	0	0	0	0	0	0	0	0	0	0	0	0	0	0	0	0	0	0	0	0	0	0	0	0	0	0	0	0	0	0	0	0	0	0	0	0	0	0	0	0	0	0	0	0	0
Hydrogenophaga	0	0	0	0	0	0	0	0	0	0	0	0	0	0	0	0	0	0	0	0	0	0	0	0	0	0	0	0	0	0	0	0	0	0	0	0	0	0	0	0	0	0	0	0	0	0	0	0	0
Hydrogenoanaerobacterium	0	0	0	0	0	0	0	0	0	0.000281251	0	0	0	0	0	0	0	0	0	0	0	0	0	0	0	0	0	0	0.00120955	0	0	0	0	0	0	0	0	0	0	0	0	0	0	0	0	0	0	0	0
Arthrobacter	0	0	0	0	0	0	0	0	0	0	0	0	0	0	0	0	0	0	0	0	0	0	0	0	0	0	0	0	0	0	0	0	0	0	0	0	0	0	0	0	0	0	0	0	0	0	0	0	0
Arenimonas	0	0	0	0	0	0	0	0	0	0	0	0	0	0	0	0	0	0	0	0	0	0	0	0	0	0	0	0	0	0	0	0	0	0	0	0	0	0	0	0	0	0	0	0	0	0	0	0	0
Pseudochrobactrum	0	0	0	0	0	0	0	0	0	0	0	0	0	0	0	0	0	0	0	0	0	0	0	0	0	0	0	0	0	0	0	0	0	0	0	0	0	0	0	0	0	0	0	0	0	0	0	0	0
Faecalibaculum	0	0	0	0	0	0	0	0	0	0	0	0	0	0	0	0	0	0	0	0	0	0	0	0	0	0	0	0	0	0	0	0	0	0	0	0	0	0	0	0	0	0	0	0	0	0	0	0	0
Blastococcus	0	0	0	0	0	0	0	0	0	0	0	0	0	0	0	0	0	0	0	0	0	0	0	0	0	0	0	0	0	0	0	0	0	0	0	0	0	0	0	0	0	0	0	0	0	0	0	0	0
Mucispirillum	0	0	0	0	0	0	0	0	0	0	0	0	0	0	0	0	0	0	0	0	0	0	0	0	0	0	0	0	0	0	0	0	0	0	0	0	0	0	0	0	0	0	0	0	0	0	0	0	0
Burkholderia-Caballeronia-Paraburkholderia	0	0	0	0	0	0	0	0	0	0	0	0	0	0	0	0	0	0	0	0	0	0	0	0	0	0	0	0	0	0	0	0	0	0	0	0	0	0	0	0	0	0	0	0	0	0	0	0	0
Alkanindiges	0	0	0	0	0	0	0	0	0	0	0	0	0	0	0	0	0	0	0	0	0	0	0	0	0	0	0	0	0	0	0	0	0	0	0	0	0	0	0	0	0	0	0	0	0	0	0	0	0
Mycobacterium	0	0	0	0	0	0	0	0	0	0	0	0	0	0	0	0	0	0	0	0	4.0861e-05	0	0	0	0	0	0	0	0	0	0	0	0	0	0	0	0	0	0	0	0	0	0	0	0	0	0	0	0
Wohlfahrtiimonas	0	0	0	0	0	0	0	0	0	0	0	0	0	0	0	0	0	0	0	0	0	0	0	0	0	0	0	0	0	0	0	0	0	0	0	0	0	0	0	0	0	0	0	0	0	0	0	0	0
Asteroleplasma	0	0	0	0	0	0	0	0	0	0	0	0.00406482	0	0	0	0	0	0	0	0	0	0	0	0	0	0	0	0	0	0	0	0	0	0	0	0	0	0	0	0	0	0	0	0	0	0	0	0	0
Alcanivorax	0	0	0	0	0	0	0	0	0	0	0	0	0	0	0	0	0	0	0	0	0	0	0	0	0	0	0	0	0	0	0	0	0	0	0	0	0	0	0	0	0	0	0	0	0	0	0	0	0
Anaerovibrio	0	0	0	0	0	0	0	0	0	0	0	0	0	0	0	0	0	0	0	0	0	0	0	0	0	0	0	0	0	0	0	0	0	0	0	0	0	0	0	0	0	0	0	0	0	0	0	0	0
DNF00809	0	0	0	0	0	0	0	0	0	0	0	0	0	0	0	0	0	0	0	0	0	0	0	0	0	0	0	0	0	0	0	0	0	0	0	0	0	0	0	0	0	0	0	0	0	0	0	0	0
Pseudopropionibacterium	0	0	0	0	0	0	0	0	0	0	0	0	0	0	0	0	0	0	0	0	0	0	0	0	0	0	0	0	0	0	0	0	0	0	0	0	0	0	0	0	0	0	0	0	0	0	0	0	0
Tepidiphilus	0	0	0	0	0	0	0	0	0	0	0	0	0	0	0	0	0	0	0	0	0	0	0	0	0	0	0	0	0	0	0	0	0	0	0	0	0	0	0	0	0	0	0	0	0	0	0	0	0
Facklamia	0	0	0	0	0	0	0	0	0	0	0	0	0	0	0	0	0	0	0	0	0	0	0	0	0	0	0	0	0	0	0	0	0	0	0	0	0	0	0	0	0	0	0	0	0	0	0	0	0
Actinomycetospora	0	0	0	0	0	0	0	0	0	0	0	0	0	0	0	0	0	0	0	0	0	0	0	0	0	0	0	0	0	0	0	0	0	0	0	0	0	0	0	0	0	0	0	0	0	0	0	0	0
Catonella	0	0	0	0	0	0	0	0	0	0	0	0	0	0	0	0	0	0	0	0	0	0	0	0	0	0	0	0	0	0	0	0	0	0	0	0	0	0	0	0	0	0	0	0	0	0	0	0	0
Dolosigranulum	0	0	0	0	0	0	0	0	0	0	0	0	0	0	0	0	0	0	0	0	0.000735498	0	0	0	0	0	0	0	0	0	0	0	0	0	0	0	0	0	0	0	0	0	0	0	0	0	0	0	0
Serratia	0	0	0	0	0	0	0	0	0	0	0	0	0	0	0	0	0	0	0	0	0	0	0	0	0	0	0	0	0	0	0	0	0	0	0	0	0	0	0	0	0	0	0	0	0	0	0	0	0
LD29	0	0	0	0	0	0	0	0	0	0	0	0	0	0	0	0	0	0	0	0	0	0	0	0	0	0	0	0	0	0	0	0	0	0	0	0	0	0	0	0	0	0	0	0	0	0	0	0	0
DSSF69	0	0	0	0	0	0	0	0	0	0	0	0	0	0	0	0	0	0	0	0	0	0	0	0	0	0	0	0	0	0	0	0	0	0	0	0	0	0	0	0	0	0	0	0	0	0	0	0	0
UCG-008	0	0	0	0	0	0	0	0	0	0	0	0.00123792	0	0	0	0	0	0	0	0	0	0	0	0	0	0	0	0	0	0	0	0	0	0	0	0	0	0	0	0	0	0	0	0	0	0	0	0	0
Craurococcus-Caldovatus	0	0	0	0	0	0	0	0	0	0	0	0	0	0	0	0	0	0	0	0	0	0	0	0	0	0	0	0	0	0	0.000101853	0	0	0	0	0	0	0	0	0	0	0	0	0	0	0	0	0	0
Streptobacillus	0	0	0	0	0	0	0	0	0	0	0	0	0	0	0	0	0	0	0	0	0	0	0	0	0	0	0	0	0	0	0.000155775	0	0	0	0	0	0	0	0	0	0	0	0	0	0	0	0	0	0
Stackebrandtia	0	0	0	0	0	0	0	0	0	0	0	0	0	0	0	0	0	0	0	0	0	0	0	0	0	0	0	0	0	0	0	0	0	0	0	0	0	0	0	0	0	0	0	0	0	0	0	0	0
Erysipelothrix	0	0	0	0	0	0	0	0	0	0	0	0	0	0	0	0	0	0	0	0	0	0	0	0	0	0	0	0	0	0	0	0	0	0	0	0	0	0	0	0	0	0	0	0	0	0	0	0	0
Sphaerochaeta	0	0	0	0	0	0	0	0	0	0	0	0	0	0	0	0	0	0	0	0	0	0	0	0	0	0	0	0	0	0	0	0	0	0	0	0	0	0	0	0	0	0	0	0	0	0	0	0	0
Empedobacter	0	0	0	0	0	0	0	0	0	0	0	0	0	0	0	0	0	0	0	0	0	0	0	0	0	0	0	0	0	0	0	0	0	0	0	0	0	0	0	0	0	0	0	0	0	0	0	0	0
Shewanella	0	0	0	0	0	0	0	0	0	0	0	0	0	0	0	0	0	0	0	0	0	0	0	0	0	0	0	0	0	0	0	0	0	0	0	0	0	0	0	0	0	0	0	0	0	0	0	0	0
Dyadobacter	0	0	0	0	0	0	0	0	0	0	0	0	0	0	0	0	0	0	0	0	0	0	0	0	0	0	0	0	0	0	0	0	0	0	0	0	0	0	0	0	0	0	0	0	0	0	0	0	0
Robinsoniella	0.000367959	0	0.0011295	0	0	0	0	0	0	0	0	0	0	0	0	0	0	0	0	0	0	0	0	0	0	0	0	0	0	0	0	0	0	0	0	0	0	0	0	0	0	0	0	0	0	0	0	0	0
Moheibacter	0	0	0	0	0	0	0	0	0	0	0	0	0	0	0	0	0	0	0	0	0	0	0	0	0	0	0	0	0	0	0	0	0	0	0	0	0	0	0	0	0	0	0	0	0	0	0	0	0
Herbinix	0	0	0	0	0	0	0	0	0	0	0	0	0	0	0	0	0	0	0	0	0	0	0	0	0	0	0	0	0	0	0	0	0	0	0.00104397	0	0	0	0	0	0	0	0	0	0	0	0	0	0
[Eubacterium]_oxidoreducens_group	0	0	0	0	0	0	0	0	0	0	0	0	0	0	0	0	0	0	0	0	0	0	0	0	0	0	0	0	0	0	0	0	0	0	0	0	0	0	0	0	0	0	0	0	0	0	0	0	0
Lachnospiraceae_UCG-006	0	0	0	0	0	0	0	0	0	0	0	0	0	0	0	0	0	0	0	0	0	0	0	0	0	0	0	0	0	0	0	0	0	0	0	0	0	0	0	0	0	0	0	0	0	0	0	0	0
Algoriphagus	0	0	0	0	0	0	0	0	0	0	0	0	0	0	0	0	0	0	0	0	0	0	0	0	0	0	0	0	0	0	0	0	0	0	0	0	0	0	0	0	0	0	0	0	0	0	0	0	0
Candidatus_Obscuribacter	0	0	0	0	0	0	0	0	0	0	0	0	0	0	0	0	0	0	0	0	0	0	0	0	0	0	0	0	0	0	0	0	0	0	0	0	0	0	0	0	0	0	0	0	0	0	0	0	0
Xanthobacter	0	0	0	0	0	0	0	0	0	0	0	0	0	0	0	0	0	0	0	0	0	0	0	0	0	0	0	0	0	0	0	0	0	0	0	0	0	0	0	0	0	0	0	0	0	0	0	0	0
Lachnospiraceae_NK3A20_group	0	0	0	0	0	0	0	0	0	0	0	0	0	0	0	0	0	0	0	0	0	0	0	0	0	0	0	0	0	0	0	0	0	0	0	0	0	0	0	0	0	0	0	0	0	0	0	0	0
Phocaeicola	0	0	0	0	0	0	0	0	0	0	0	0	0	0	0	0	0	0	0	0	0	0	0	0	0	0	0	0	0	0	0	0	0	0	0	0	0	0	0	0	0	0	0	0	0	0	0	0.000102596	0
Tannerella	0	0	0	0	0	0	0	0	0	0	0	0	0	0	0	0	0	0	0	0	0	0	0	0	0	0	0	0	0	0	0	0	0	0	0	0	0	0	0	0	0	0	0	0	0	0	0	0	0
Peredibacter	0	0	0	0	0	0	0	0	0	0	0	0	0	0	0	0	0	0	0	0	0	0	0	0	0	0	0	0	0	0	0	0	0	0	0	0	0	0	0	0	0	0	0	0	0	0	0	0	0
Filifactor	0	0	0	0	0	0	0	0	0	0	0	0	0	0	0	0	0	0	0	0	6.53776e-05	0	0	0	0	0	8.3437e-05	0	0	0	0	0	0	0	0	0	0	0	0	0	0	0	0	0	0	0	0	0	0
Myroides	0	0	0	0	0	0	0	0	0	0	0	0	0	0	0	0	0	0	0	0	0	0	0	0	0	0	0	0	0	0	0	0	0	0	0	0	0	0	0	0	0	0	0	0	0	0	0	0	0
Nubsella	0	0	0	0	0	0	0	0	0	0	0	0	0	0	0	0	0	0	0	0	0	0	0	0	0	0	0	0	0	0	0	0	0	0	0	0	0	0	0	0	0	0	0	0	0	0	0	0	0
ASF356	0	0	0	0	0	0	0	0	0	0	0	0	0	0	0	0	0	0	0	0	0	0	0	0	0	0	0	0	0	0	0	0	0	0	0	0	0	0	0	0	0	0	0	0	0	0	0	0	0
Aliihoeflea	0	0	0	0	0	0	0	0	0	0	0	0	0	0	0	0	0	0	0	0	0	0	0	0	0	0	0	0	0	0	0	0	0	0	0	0	0	0	0	0	0	0	0	0	0	0	0	0	0
Tumebacillus	0	0	0	0	0	0	0	0	0	0	0	0	0	0	0	0	0	0	0	0	0	0	0	0	0	0	0	0	0	0	0	0	0	0	0	0	0	0	0	0	0	0	0	0	0	0	0	0	0
Parapusillimonas	0	0	0	0	0	0	0	0	0	0	0	0	0	0	0	0	0	0	0	0	0	0	0	0	0	0	0	0	0	0	0	0	0	0	0	0	0	0	0	0	0	0	0	0	0	0	0	0	0
[Eubacterium]_yurii_group	0	0	0	0	0	0	0	0	0	0	0	0	0	0	0	0	0	0	0	0	0	0	0	0	0	0	0	0	0	0	0	0	0	0	0	0	0	0	0	0	0	0	0	0	0	0	0	0	0
Sphingopyxis	0	0	0	0	0	0	0	0	0	0	0	0	0	0	0	0	0	0	0	0	0	0	0	0	0	0	0	0	0	0	0	0	0	0	0	0	0	0	0	0	0	0	0	0	0	0	0	0	0
Mesorhizobium	0	0	0	0	0	0	0	0	0	0	0	0	0	0	0	0	0	0	0	0	0	0	0	0	0	0	0	0	0	0	0	0	0	0	0	0	0	0	0	0	0	0	0	0	0	0	0	0	0
Enterobacter	0	0	0	0	0	0	0	0	0	0	0	0	0	0	0	0	0	0	0	0	0	0	0	0	0	0	0	0	0	0	0	0	0	0	0	0	0	0	0	0	0	0	0	0	0	0	0	0	0
Devosia	0	0	0	0	0	0	0	0	0	0	0	0	0	0	0	0	0	0	0	0	0	0	0	0	0	0	0	0	0	0	0	0	0	0	0	0	0	0	0	0	0	0	0	0	0	0	0	0	0
Kingella	0	0	0	0	0	0	0	0	0	0	0	0	0	0	0	0	0	0	0	0	0	0	0	0	0	0	0	0	0	0	0	0	0	0	0	0	0	0	0	0	0	0	0	0	0	0	0	0	0
Laribacter	0	0	0	0	0	0	0	0	0	0	0	0	0	0	0	0	0	0	0	0	0	0	0	0	0	0	0	0	0	0	0	0	0	0	0	0	0	0	0	0	0	0	0	0	0	0	0	0	0
Anaeroplasma	0	0	0	0	0	0	0	0	0	0	0	0	0	0	0	0	0	0	0	0	0	0	0	0	0	0	0	0	0	0	0	0	0	0	0	0	0	0	0	0	0	0	0	0	0	0	0	0	0
Exiguobacterium	0	0	0	0	0	0	0	0	0	0	0	0	0	0	0	0	0	0	0	0	0	0	0	0	0	0	0	0	0	0	0	0	0	0	0	0	0	0	0	0	0	0	0	0	0	0	0	0	0
Azonexus	0	0	0	0	0	0	0	0	0	0	0	0	0	0	0	0	0	0	0	0	0	0	0	0	0	0	0	0	0	0	0	0	0	0	0	0	0	0	0	0	0	0	0	0	0	0	0	0	0
Bdellovibrio	0	0	0	0	0	0	0	0	0	0	0	0	0	0	0	0	0	0	0	0	0	0	0	0	0	0	0	0	0	0	0	0	0	0	0	0	0	0	0	0	0	0	0	0	0	0	0	0	0
Clostridium_sensu_stricto_2	0	0	0	0	0	0	0	0	0	0	0	0	0	0	0	0	0	0	0	0	0	0	0	0	0	0	0	0	0	0	0	0	0	0	0	0	0	0	0	0	0	0	0	0	0	0	0	0	0
Gallibacterium	0	0	0	0	0	0	0	0	0	0	0	0	0	0	0	0	0	0	0	0	0	0	0	0	0	0	0	0	0	0	0	0	0	0	0	0	0	0	0	0	0	0	0	0	0	0	0	0	0
Calothrix_PCC-6303	0	0	0	0	0	0	0	0	0	0	0	0	0	0	0	0	0	0	0	0	0	0	0	0	0	0	0	0	0	0	0	0	0	0	0	0	0	0	0	0	0	0	0	0	0	0	0	0	0
Eikenella	0	0	0	0	0	0	0	0	0	0	0	0	0	0	0	0	0	0	0	0	0	0	0	0	0	0	0	0	0	0	0	0	0	0	0	0	0	0	0	0	0	0	0	0	0	0	0	0	0
Blastocatella	0	0	0	0	0	0	0	0	0	0	0	0	0	0	0	0	0	0	0	0	0	0	0	0	0	0	0	0	0	0	0	0	0	0	0	0	0	0	0	0	0	0	0	0	0	0	0	0	0
Anaerosporobacter	0	0	0	0	0	0	0	0	0	0	0	0	0	0	0	0	0	0	0	0	0	0	0	0	0	0	0	0	0	0	0	0	0	0	0	0	0	0	0	0	0	0	0	0	0	0	0	0	0
Haliangium	0	0	0	0	0	0	0	0	0	0	0	0	0	0	0	0	0	0	0	0	0	0	0	0	0	0	0	0	0	0	0	0	0	0	0	0	0	0	0	0	0	0	0	0	0	0	0	0	0
Gordonia	0	0	0	0	1.73659e-05	0	0	0	0	0	0	0	0	0	0	0	0	0	0	0	0	0	0	0	0	0	0	0	0	0	0	0	0	0	0	0	0	0	0	0	0	0	0	0	0	0	0	0	0
Gemmata	0	0	0	0	0	0	0	0	0	0	0	0	0	0	0	0	0	0	0	0	0	0	0	0	0	0	0	0	0	0	0	0	0	0	0	0	0	0	0	0	0	0	0	0	0	0	0	0	0
Hafnia-Obesumbacterium	0	0	0	0.0144724	0	0	0	0	0	0	0	0	0	0	0	0	0	0	0	0	0	0	0	0	0	0	0	0	0	0	0	0	0	0	0	0	0	0	0	0	0	0	0	0	0	0	0	0.000112855	0.00151052
Pseudoxanthomonas	0	0	0	0	0	0	0	0	0	0	0	0	0	0	0	0	0	0	0	0	0	0	0	0	0	0	0	0	0	0	0	0	0	0	0	0	0	0	0	0	0	0	0	0	0	0	0	0	0
Pygmaiobacter	0	0	0	0	0	0	0	0	0	0	0	0	0	0	0	0	0	0	0	0	0	0	0	0	0	0	0	0	0	0	0	0	0	0	0	0	0	0	0	0	0	0	0	0	0	0	0	0	0
Rhizorhapis	0	0	0	0	0	0	0	0	0	0	0	0	0	0	0	0	0	0	0	0	0	0	0	0	0	0	0	0	0	0	0	0	0	0	0	0	0	0	0	0	0	0	0	0	0	0	0	0	0
Phenylobacterium	0	0	0	0	0	0	0	0	0	0	0	0	0	0	0	0	0	0	0	0	0	0	0	0	0	0	0	0	0	0	0	0	0	0	0	0	0	0	0	0	0	0	0	0	0	0	0	0	0
Fluviicola	0	0	0	0	0	0	0	0	0	0	0	0	0	0	0	0	0	0	0	0	0	0	0	0	0	0	0	0	0	0	0	0	0	0	0	0	0	0	0	0	0	0	0	0	0	0	0	0	0
Oceanobacillus	0	0	0	0	0	0	0	0	0	0	0	0	0	0	0	0	0	0	0	0	0	0	0	0	0	0	0	0	0	0	0	0	0	0	0	0	0	0	0	0	0	0	0	0	0	0	0	0	0
Pajaroellobacter	0	0	0	0	0	0	0	0	0	0	0	0	0	0	0	0	0	0	0	0	0	0	0	0	0	0	0	0	0	0	0	0	0	0	0	0	0	0	0	0	0	0	0	0	0	0	0	0	0
Pseudoclavibacter	0	0	0	0	0	0	0	0	0	0	0	0	0	0	0	0	0	0	0	0	0	0	0	0	0	0	0	0	0	0	0	0	0	0	0	0	0	0	0	0	0	0	0	0	0	0	0	0	0
Pseudoramibacter	3.34508e-05	0	7.33439e-05	0	0	0	0	0	0	0	0	0	0	0	0	0	0	0	0	0	0	0	0	0	0	0	0	0	0	0	0	0	0	0	0.000173995	0	0	0	0	0	0	0	0	0	0	0	0	2.05191e-05	0
Flectobacillus	0	0	0	0	0	0	0	0	0	0	0	0	0	0	0	0	0	0	0	0	0	0	0	0	0	0	0	0	0	0	0	0	0	0	0	0	0	0	0	0	0	0	0	0	0	0	0	0	0
Fimbriiglobus	0	0	0	0	0	0	0	0	0	0	0	0	0	0	0	0	0	0	0	0	0	0	0	0	0	0	0	0	0	0	0	0	0	0	0	0	0	0	0	0	0	0	0	0	0	0	0	0	0
Edaphobaculum	0	0	0	0	0	0	0	0	0	0	0	0	0	0	0	0	0	0	0	0	0	0	0	0	0	0	0	0	0	0	0	0	0	0	0	0	0	0	0	0	0	0	0	0	0	0	0	0	0
Truepera	0	0	0	0	0	0	0	0	0	0	0	0	0	0	0	0	0	0	0	0	0	0	0	0	0	0	0	0	0	0	2.99568e-05	0	0	0	0	0	0	0	0	0	0	0	0	0	0	0	0	0	0
Catenisphaera	0	0	0	0	0	0	0	0	0	0	0	0	0	0	0	0	0	0	0	0	0	0	0	0	0	0	0	0	0	0	0	0	0	0	0	0	0	0	0	0	0	0	0	0	0	0	0	0	0
Tropheryma	0	0	0	0	0	0	0	0	0	0	0	0	0	0	4.55221e-05	0	0	0	0	0	0	0	0	0	0	0	0	0	0	0	0	0	0	0	0	0	0	0	0	0	0	0	0	0	0	0	0	0	0
Terrimicrobium	0	0	0	0	0	0	0	0	0	0	0	0	0	0	0	0	0	0	0	0	0	0	0	0	0	0	0	0	0	0	0	0	0	0	0	0	0	0	0	0	0	0	0	0	0	0	0	0	0
Thermicanus	0	0	0	0	0	0	0	0	0	0	0	0	0	0	0	0	0	0	0	0	0	0	0	0	0	0	0	0	0	0	0	0	0	0	0	0	0	0	0	0	0	0	0	0	0	0	0	0	0
Caproiciproducens	0	0	0	0	0	0	0	0	0	0	0	0	0	0	0	0	0	0	0	0	0	0	0	0	0	0	0	0	0	0	0	0	0	0	0	0	0	0	0	0	0	0	0	0	0	0	0	0	0
Caldicoprobacter	0	0	0	0	0	0	0	0	0	0	0	0	0	0	0	0	0	0	0	0	0	0	0	0	0	0	0	0	0	0	0	0	0	0	0	0	0	0	0	0	0	0	0	0	0	0	0	0	0
Bryobacter	0	0	0	0	0	0	0	0	0	0	0	0	0	0	0	0	0	0	0	0	0	0	0	0	0	0	0	0	0	0	0	0	0	0	0	0	0	0	0	0	0	0	0	0	0	0	0	0	0
Candidatus_Solibacter	0	0	0	0	0	0	0	0	0	0	0	0	0	0	0	0	0	0	0	0	0	0	0	0	0	0	0	0	0	0	0	0	0	0	0	0	0	0	0	0	0	0	0	0	0	0	0	0	0
Candidatus_Xiphinematobacter	0	0	0	0	0	0	0	0	0	0	0	0	0	0	0	0	0	0	0	0	0	0	0	0	0	0	0	0	0	0	0	0	0	0	0	0	0	0	0	0	0	0	0	0	0	0	0	0	0
Actinobacillus	0	0	0	0	0	0	0	0	0	0	0	0.0011363	0	0	0	3.32586e-05	0	0	0	0	0	0	0	0	0	0	0	0	0	0	0	0	0	0	0	0	0	0	0	0	0	0	0	0	0	0	0	0	0
Chroococcidiopsis_SAG_2023	0	0	0	0	0	0	0	0	0	0	0	0	0	0	0	0	0	0	0	0	0	0	0	0	0	0	0	0	0	0	0.000167758	0	0	0	0	0	0	0	0	0	0	0	0	0	0	0	0	0	0
Aeromicrobium	0	0	0	0	0	0	0	0	0	0	0	0	0	0	0	0	0	0	0	0	0	0	0	0	0	0	0	0	0	0	0	0	0	0	0	0	0	0	0	0	0	0	0	0	0	0	0	0	0
Aureimonas	0	0	0	0	0	0	0	0	0	0	0	0	0	0	0	0	0	0	0	0	0	0	0	0	0	0	0	0	0	0	0	0	0	0	0	0	0	0	0	0	0	0	0	0	0	0	0	0	0
Dokdonella	0	0	0	0	0	0	0	0	0	0	0	0	0	0	0	0	0	0	0	0	0	0	0	0	0	0	0	0	0	0	0	0	0	0	0	0	0	0	0	0	0	0	0	0	0	0	0	0	0
Roseomonas	0	0	0	0	0	0	0	0	0	0	0	0	0	0	0	0	0	0	0	0	0	0	0	0	0	0	0	0	0	0	0	0	0	0	0	0	0	0	0	0	0	0	0	0	0	0	0	0	0
Rubrobacter	0	0	0	0	0	0	0	0	0	0	0	0	0	0	0	0	0	0	0	0	0	0	0	0	0	0	0	0	0	0	0	0	0	0	0	0	0	0	0	0	0	0	0	0	0	0	0	0	0
Dermacoccus	0	0	0	0	0	0	0	0	0	0	0	0	0	0	0	0	0	0	0	0	0	0	0	0	0	0	0	0	0	0	0	0	0	0	0	0	0	0	0	0	0	0	0	0	0	0	0	0	0
Sumerlaea	0	0	0	0	0	0	0	0	0	0	0	0	0	0	0	0	0	0	0	0	0	0	0	0	0	0	0	0	0	0	0	0	0	0	0	0	0	0	0	0	0	0	0	0	0	0	0	0	0
Adlercreutzia	0	0	0	0	0	0	0	0	0	0	0	0	0	0	0	0	0	0	0	0	0	0	0	0	0	0	0	0	0	0	0	0	0	0	0	0	0	0	0	0	0	0	0	0	0	0	0	0	0
Clostridium_sensu_stricto_3	0	0	0	0	0	0	0	0	0	0	0	0	0	0	0	0	0	0	0	0	0	0	0	0	0	0	0	0	0	0	0	0	0	0	0	0	0	0	0	0	0	0	0	0	0	0	0	0	0
Sharpea	0	0	0	0	0	0	0	0	0	0	0	0	0	0	0	0	0	0	0	0	0	0	0	0	0	0	0	0	0	0	0	0	0	0	0	0	0	0	0	0	0	0	0	0	0	0	0	0	0
Soonwooa	0	0	0	0	0	0	0	0	0	0	0	0	0	0	0	0	0	0	0	0	0	0	0	0	0	0	0	0	0	0	0	0	0	0	0	0	0	0	0	0	0	0	0	0	0	0	0	0	0
Nitrosomonas	0	0	0	0	0	0	0	0	0	0	0	0	0	0	0	0	0	0	0	0	0	0	0	0	0	0	0	0	0	0	0	0	0	0	0	0	0	0	0	0	0	0	0	0	0	0	0	0	0
Alloscardovia	0	0	0	3.30671e-05	0	0	0	0	0	0	0	0	0	0	0	0	0	0	0	0	0	0	0	0	0	0	0	1.09747e-05	0	0	0	0	0	0	0	0	0	0	0	0	0	0	0	3.61839e-05	0	0	0	7.1817e-05	0
Altererythrobacter	0	0	0	0	0	0	0	0	0	0	0	0	0	0	0	0	0	0	0	0	0	0	0	0	0	0	0	0	0	0	0	0	0	0	0	0	0	0	0	0	0	0	0	0	0	0	0	0	0
Ketobacter	0	0	0	0	0	0	0	0	0	0	0	0	0	0	0	0	0	0	0	0	0	0	0	0	0	0	0	0	0	0	0	0	0	0	0	0	0	0	0	0	0	0	0	0	0	0	0	0	0
Lachnospiraceae_FE2018_group	0	0	0	0	0	0	0	0	0	0	0	0	0	0	0	0	0	0	0	0	0	0	0	0	0	0	0	0	0	0	0	0	0	0	0	0	0	0	0	0	0	0	0	0	0	0	0	0	0
Lachnospiraceae_NK4B4_group	0	0	0	0	0	0	0	0	0	0	0	0	0	0	0	0	0	0	0	0	0	0	0	0	0	0	0	0	0	0	0	0	0	0	0	0	0	0	0	0	0	0	0	0	0	0	0	0	0
Macellibacteroides	0	0	0	0	0	0	0	0	0	0	0	0	0	0	0	0	0	0	0	0	0	0	0	0	0	0	0	0	0	0	0	0	0	0	0	0	0	0	0	0	0	0	0	0	0	0	0	0	0
Nevskia	0	0	0	0	0	0	0	0	0	0	0	0	0	0	0	0	0	0	0	0	0	0	0	0	0	0	0	0	0	0	0	0	0	0	0	0	0	0	0	0	0	0	0	0	0	0	0	0	0
Microlunatus	0	0	0	0	0	0	0	0	0	0	0	0	0	0	0	0	0	0	0	0	0	0	0	0	0	0	0	0	0	0	0	0	0	0	0	0	0	0	0	0	0	0	0	0	0	0	0	0	0
Kosakonia	0	0	0	0	0	0	0	0	0	0	0	0	0	0	0	0	0	0	0	0	0	0	0	0	0	0	0	0	0	0	0	0	0	0	0	0	0	0	0	0	0	0	0	0	0	0	0	0	0
Limnobacter	0	0	0	0	0	0	0	0	0	0	0	0	0	0	0	0	0	0	0	0	0	0	0	0	0	0	0	0	0	0	0	0	0	0	0	0	0	0	0	0	0	0	0	0	0	0	0	0	0
Methanomassiliicoccus	0	0	0	0	0	0	0	0	0	0	0	0	0	0	0	0	0	0	0	0	0	0	0	0	0	0	0	0	0	0	0	0	0	0	0	0	0	0	0	0	0	0	0	0	0	0	0	0	0
Tetragenococcus	0	0	0	0	0	0	0	0	0	0	0	0	0	0	0	0	0	0	0	0	0	0	0	0	0	0	0	0	0	0	0	0	0	0	0	0	0	0	0	0	0	0	0	0	0	0	0	0	0
Psychrobacillus	0	0	0	0	0	0	0	0	0	0	0	0	0	0	0	0	0	0	0	0	0	0	0	0	0	0	0	0	0	0	0	0	0	0	0	0	0	0	0	0	0	0	0	0	0	0	0	0	0
Taibaiella	0	0	0	0	0	0	0	0	0	0	0	0	0	0	0	0	0	0	0	0	0	0	0	0	0	0	0	0	0	0	0	0	0	0	0	0	0	0	0	0	0	0	0	0	0	0	0	0	0
Arcobacter	0	0	0	0	0	0	0	0	0	0	0	0	0	0	0	0	0	0	0	0	0	0	0	0	0	0	0	0	0	0	0	0	0	0	0	0	0	0	0	0	0	0	0	0	0	0	0	0	0
Anaerobiospirillum	0	0	0	0	0	0	0	0	0	0	0	0	0	0	0	0	0	0	0	0	0	0	0	0	0	0	0	0	0	0	0	0	0	0	0	0	0	0	0	0	0	0	0	0	0	0	0	0	0
Arcanobacterium	0	0	0	0	0	0	0	0	0	0	0	0	0	0	0	0	0	0	0	0	0	0	0	0	0	0	0	0	0	0	0	0	0	0	0	0	0	0	0	0	0	0	0	0	0	0	0	0	0
Pirellula	0	0	0	0	0	0	0	0	0	0	0	0	0	0	0	0	0	0	0	0	0	0	0	0	0	0	0	0	0	0	0	0	0	0	0	0	0	0	0	0	0	0	0	0	0	0	0	0	0
Fibrisoma	0	0	0	0	0	0	0	0	0	0	0	0	0	0	0	0	0	0	0	0	0	0	0	0	0	0	0	0	0	0	0	0	0	0	0	0	0	0	0	0	0	0	0	0	0	0	0	0	0
UTBCD1	0	0	0	0	0	0	0	0	0	0	0	0	0	0	0	0	0	0	0	0	0	0	0	0	0	0	0	0	0	0	0	0	0	0	0	0	0	0	0	0	0	0	0	0	0	0	0	0	0
Neomicrococcus	0	0	0	0	0	0	0	0	0	0	0	0	0	0	0	0	0	0	0	0	0	0	0	0	0	0	0	0	0	0	0	0	0	0	0	0	0	0	0	0	0	0	0	0	0	0	0	0	0
Perlucidibaca	0	0	0	0	0	0	0	0	0	0	0	0	0	0	0	0	0	0	0	0	0	0	0	0	0	0	0	0	0	0	0	0	0	0	0	0	0	0	0	0	0	0	0	0	0	0	0	0	0
Luteolibacter	0	0	0	0	0	0	0	0	0	0	0	0	0	0	0	0	0	0	0	0	0	0	0	0	0	0	0	0	0	0	0	0	0	0	0	0	0	0	0	0	0	0	0	0	0	0	0	0	0
Propionivibrio	0	0	0	0	0	0	0	0	0	0	0	0	0	0	0	0	0	0	0	0	0	0	0	0	0	0	0	0	0	0	0	0	0	0	0	0	0	0	0	0	0	0	0	0	0	0	0	0	0
Aquicella	0	0	0	0	0	0	0	0	0	0	0	0	0	0	0	0	0	0	0	0	0	0	0	0	0	0	0	0	0	0	0	0	0	0	0	0	0	0	0	0	0	0	0	0	0	0	0	0	0
Propionimicrobium	0	0	0	0	0	0	0	0	0	0	0	0	0	0	0	0	0	0	0	0	0	0	0	0	0	0	0	0	0	0	0	0	0	0	0	0	0	0	0	0	0	0	0	0	0	0	0	0	0
Timonella	0	0	0	0	0	0	0	0	0	0	0	0	0	0	0	0	0	0	0	0	0	0	0	0	0	0	0	0	0	0	0	0	0	0	0	0	0	0	0	0	0	0	0	0	0	0	0	0	0
Thiobacillus	0	0	0	0	0	0	0	0	0	0	0	0	0	0	0	0	0	0	0	0	0	0	0	0	0	0	0	0	0	0	0	0	0	0	0	0	0	0	0	0	0	0	0	0	0	0	0	0	0
Pyrinomonas	0	0	0	0	0	0	0	0	0	0	0	0	0	0	0	0	0	0	0	0	0	0	0	0	0	0	0	0	0	0	0	0	0	0	0	0	0	0	0	0	0	0	0	0	0	0	0	0	0
Microvirgula	0	0	0	0	0	0	0	0	0	0	0	0	0	0	0	0	0	0	0	0	0	0	0	0	0	0	0	0	0	0	0	0	0	0	0	0	0	0	0	0	0	0	0	0	0	0	0	0	0
Criibacterium	0	0	0	0	0	0	0	0	0	0	0	0	0	0	0	0	0	0	0	0	0	0	0	0	0	0	0	0	0	0	0	0	0	0	0	0	0	0	0	0	0	0	0	0	0	0	0	0	0
Curtobacterium	0	0	0	0	0	0	0	0	0	0	0	0	0	0	0	0	0	0	0	0	0	0	0	0	0	0	0	0	0	0	0	0	0	0	0	0	0	0	0	0	0	0	0	0	0	0	0	0	0
SD04E11	0	0	0	0	0	0	0	0	0	0	0	0	0	0	0	0	0	0	0	0	0	0	0	0	0	0	0	0	0	0	0	0	0	0	0	0	0	0	0	0	0	0	0	0	0	0	0	0	0
SH-PL14	0	0	0	0	0	0	0	0	0	0	0	0	0	0	0	0	0	0	0	0	0	0	0	0	0	0	0	0	0	0	0	0	0	0	0	0	0	0	0	0	0	0	0	0	0	0	0	0	0
SWB02	0	0	0	0	0	0	0	0	0	0	0	0	0	0	0	0	0	0	0	0	0	0	0	0	0	0	0	0	0	0	0	0	0	0	0	0	0	0	0	0	0	0	0	0	0	0	0	0	0
Sedimentibacter	0	0	0	0	0	0	0	0	0	0	0	0	0	0	0	0	0	0	0	0	0	0	0	0	0	0	0	0	0	0	0	0	0	0	0	0	0	0	0	0	0	0	0	0	0	0	0	0	0
Denitrobacterium	0	0	0	0	0	0	0	0	0	0	0	0	0	0	0	0	0	0	0	0	0	0	0	0	0	0	0	0	0	0	0	0	0	0	0	0	0	0	0	0	0	0	0	0	0	0	0	0	0
Shinella	0	0	0	0	0	0	0	0	0	0	0	0	0	0	0	0	0	0	0	0	0	0	0	0	0	0	0	0	0	0	0	0	0	0	0	0	0	0	0	0	0	0	0	0	0	0	0	0	0
Dechloromonas	0	0	0	0	0	0	0	0	0	0	0	0	0	0	0	0	0	0	0	0	0	0	0	0	0	0	0	0	0	0	0	0	0	0	0	0	0	0	0	0	0	0	0	0	0	0	0	0	0
Libanicoccus	0	0	0	0	0	0	0	0	0	0	0	0	0	0	0	0	0	0	0	0	0	0	0	0	0	0	0	0	0	0	0	0	0	0	0	0	0	0	0	0	0	0	0	0	0	0	0	0	0
Desulfitibacter	0	0	0	0	0	0	0	0	0	0	0	0	0	0	0	0	0	0	0	0	0	0	0	0	0	0	0	0	0.00021787	0	0	0	0	0	0	0	0	0	0	0	0	0	0	0	0	0	0	0	0
Cytophaga	0	0	0	0	0	0	0	0	0	0	0	0	0	0	0	0	0	0	0	0	0	0	0	0	0	0	0	0	0	0	0	0	0	0	0	0	0	0	0	0	0	0	0	0	0	0	0	0	0
Methylophilus	0	0	0	0	0	0	0	0	0	0	0	0	0	0	0	0	0	0	0	0	0	0	0	0	0	0	0	0	0	0	0	0	0	0	0	0	0	0	0	0	0	0	0	0	0	0	0	0	0
Rickettsiella	0	0	0	0	0	0	0	0	0	0	0	0	0	0	0	0	0	0	0	0	0	0	0	0	0	0	0	0	0	0	0	0	0	0	0	0	0	0	0	0	0	0	0	0	0	0	0	0	0
Aequorivita	0	0	0	0	0	0	0	0	0	0	0	0	0	0	0	0	0	0	0	0	0	0	0	0	0	0	0	0	0	0	0	0	0	0	0	0	0	0	0	0	0	0	0	0	0	0	0	0	0
Chujaibacter	0	0	0	0	0	0	0	0	0	0	0	0	0	0	0	0	0	0	0	0	0	0	0	0	0	0	0	0	0	0	0	0	0	0	0	0	0	0	0	0	0	0	0	0	0	0	0	0	0
Ellin6067	0	0	0	0	0	0	0	0	0	0	0	0	0	0	0	0	0	0	0	0	0	0	0	0	0	0	0	0	0	0	0	0	0	0	0	0	0	0	0	0	0	0	0	0	0	0	0	0	0
Succiniclasticum	0	0	0	0	0	0	0	0	0	0	0	0	0	0	0	0	0	0	0	0	0	0	0	0	0	0	0	0	0	0	0	0	0	0	0	0	0	0	0	0	0	0	0	0	0	0	0	0	0
Edwardsiella	0	0	0	0	0	0	0	0	0	0	0	0	0	0	0	0	0	0	0	0	0	0	0	0	0	0	0	0	0	0	0	0	0	0	0	0	0	0	0	0	0	0	0	0	0	0	0	0	0
Rubrivirga	0	0	0	0	0	0	0	0	0	0	0	0	0	0	0	0	0	0	0	0	0	0	0	0	0	0	0	0	0	0	2.39654e-05	0	0	0	0	0	0	0	0	0	0	0	0	0	0	0	0	0	0
Mobilicoccus	0	0	0	0	0	0	0	0	0	0	0	0	0	0	0	0	0	0	0	0	0	0	0	0	0	0	0	0	0	0	0	0	0	0	0	0	0	0	0	0	0	0	0	0	0	0	0	0	0
Cnuella	0	0	0	0	0	0	0	0	0	0	0	0	0	0	0	0	0	0	0	0	0	0	0	0	0	0	0	0	0	0	0	0	0	0	0	0	0	0	0	0	0	0	0	0	0	0	0	0	0
Steroidobacter	0	0	0	0	0	0	0	0	0	0	0	0	0	0	0	0	0	0	0	0	0	0	0	0	0	0	0	0	0	0	0	0	0	0	0	0	0	0	0	0	0	0	0	0	0	0	0	0	0
Methylotenera	0	0	0	0	0	0	0	0	0	0	0	0	0	0	0	0	0	0	0	0	0	0	0	0	0	0	0	0	0	0	0	0	0	0	0	0	0	0	0	0	0	0	0	0	0	0	0	0	0
Dongia	0	0	0	0	0	0	0	0	0	0	0	0	0	0	0	0	0	0	0	0	0	0	0	0	0	0	0	0	0	0	0	0	0	0	0	0	0	0	0	0	0	0	0	0	0	0	0	0	0
Gallicola	0	0	0	0	0	0	0	0	0	0	0	0	0	0	0	0	0	0	0	0	0	0	0	0	0	0	0	0	0	0	0	0	0	0	0	0	0	0	0	0	0	0	0	0	0	0	0	0	0
Parvibacter	0	0	0	0	0	0	0	0	0	0	0	0	0	0	0	7.31689e-05	0	0	0	0	0	0	0	0	0	0	0	0	0	0	0	0	0	0	0	0	0	0	0.000308301	0	0	0	0	0	0	0	0	0	0
Janthinobacterium	0	0	0	0	0	0	0	0	0	0	0	0	0	0	0	0	0	0	0	0	0	0	0	0	0	0	0	0	0	0	0	0	0	0	0	0	0	0	0	0	0	0	0	0	0	0	0	0	0
Parasegetibacter	0	0	0	0	0	0	0	0	0	0	0	0	0	0	0	0	0	0	0	0	0	0	0	0	0	0	0	0	0	0	0	0	0	0	0	0	0	0	0	0	0	0	0	0	0	0	0	0	0
Ochrobactrum	0	0	0	0	0	0	0	0	0	0	0	0	0	0	0	0	0	0	0	0	0	0	0	0	0	0	0	0	0	0	0	0	0	0	0	0	0	0	0	0	0	0	0	0	0	0	0	0	0
Oleiphilus	0	0	0	0	0	0	0	0	0	0	0	0	0	0	0	0	0	0	0	0	0	0	0	0	0	0	0	0	0	0	0	0	0	0	0	0	0	0	0	0	0	0	0	0	0	0	0	0	0
Oligella	0	0	0	0	0	0	0	0	0	0	0	0	0	0	0	0	0	0	0	0	0	0	0	0	0	0	0	0	0	0	0	0	0	0	0	0	0	0	0	0	0	0	0	0	0	0	0	0	0
CHKCI001	0	0	0	0	0	0	0	0	0	0	0	0	0	0	0	0	0	0	0	0	0	0	0	0	0	0	0	0	0	0	0	0	0	0	0	0	0	0	0	0	0	0	0	0	0	0	0	0	0
Paenalcaligenes	0	0	0	0	0	0	0	0	0	0	0	0	0	0	0	0	0	0	0	0	0	0	0	0	0	0	0	0	0	0	0	0	0	0	0	0	0	0	0	0	0	0	0	0	0	0	0	0	0
Hyphomicrobium	0	0	0	0	0	0	0	0	0	0	0	0	0	0	0	0	0	0	0	0	0	0	0	0	0	0	0	0	0	0	0	0	0	0	0	0	0	0	0	0	0	0	0	0	0	0	0	0	0
Paenochrobactrum	0	0	0	0	0	0	0	0	0	0	0	0	0	0	0	0	0	0	0	0	0	0	0	0	0	0	0	0	0	0	0	0	0	0	0	0	0	0	0	0	0	0	0	0	0	0	0	0	0
Achromobacter	0	0	0	0	9.8407e-05	1.24885e-05	0	0	0	0	0	0	0	0	0	0	0	0	0	0	0	0	0	0	0	0	0	0	0	0	0	0	0	0	0	0	0	0	0	0	0	0	1.81557e-05	0	0	0	0	0	0
Oxalobacter	0	0	0	0	0	0	0	0	0	0	0.000194747	0.000554293	0	0	0	0	8.74244e-05	0	0	0	0	0	0	0	0	0	0	0	0.000255434	0	0	0	0	0	0	0	0.000386362	0	0	0	0	0	0	0	0	0	0	0	0.000150218
Xanthomonas	0	0	0	0	0	0	0	0	0	0	0	0	0	0	0	0	0	0	0	0	0	0	0	0	0	0	0	0	0	0	0	0	0	0	0	0	0	0	0	0	0	0	0	0	0	0	0	0	0
Niabella	0	0	0	0	0	0	0	0	0	0	0	0	0	0	0	0	0	0	0	0	0	0	0	0	0	0	0	0	0	0	0	0	0	0	0	0	0	0	0	0	0	0	0	0	0	0	0	0	0
Noviherbaspirillum	0	0	0	0	0	0	0	0	0	0	0	0	0	0	0	0	0	0	0	0	0	0	0	0	0	0	0	0	0	0	0	0	0	0	0	0	0	0	0	0	0	0	0	0	0	0	0	0	0
Candidatus_Omnitrophus	0	0	0	0	0	0	0	0	0	0	0	0	0	0	0	0	0	0	0	0	0	0	0	0	0	0	0	0	0	0	0	0	0	0	0	0	0	0	0	0	0	0	0	0	0	0	0	0	0
Blastopirellula	0	0	0	0	0	0	0	0	0	0	0	0	0	0	0	0	0	0	0	0	0	0	0	0	0	0	0	0	0	0	0	0	0	0	0	0	0	0	0	0	0	0	0	0	0	0	0	0	0
Georgenia	0	0	0	0	0	0	0	0	0	0	0	0	0	0	0	0	0	0	0	0	0	0	0	0	0	0	0	0	0	0	0	0	0	0	0	0	0	0	0	0	0	0	0	0	0	0	0	0	0
Bauldia	0	0	0	0	0	0	0	0	0	0	0	0	0	0	0	0	0	0	0	0	0	0	0	0	0	0	0	0	0	0	0	0	0	0	0	0	0	0	0	0	0	0	0	0	0	0	0	0	0
Solibacillus	0	0	0	0	0	0	0	0	0	0	0	0	0	0	0	0	0	0	0	0	0	0	0	0	0	0	0	0	0	0	0	0	0	0	0	0	0	0	0	0	0	0	0	0	0	0	0	0	0
DEV114	0	0	0	0	0	0	0	0	0	0	0	0	0	0	0	0	0	0	0	0	0	0	0	0	0	0	0	0	0	0	0	0	0	0	0	0	0	0	0	0	0	0	0	0	0	0	0	0	0
oc32	0	0	0	0	0	0	0	0	0	0	0	0	0	0	0	0	0	0	0	0	0	0	0	0	0	0	0	0	0	0	0	0	0	0	0	0	0	0	0	0	0	0	0	0	0	0	0	0	0
Clostridium_sensu_stricto_12	0	0	0	0	0	0	0	0	0	0	0	0	0	0	0	0	0	0	0	0	0	0	0	0	0	0	0	0	0	0	0	0	0	0	0	0	0	0	0	0	0	0	0	0	0	0	0	0	0
Clostridium_sensu_stricto_18	0	0	0	0	0	0	0	0	0	0	0	0	0	0	0	0	0	0	0	0	0	0	0	0	0	0	0	0	0	0	0	0	0	0	0	0	0	0	0	0	0	0	0	0	0	0	0	0	0
Clostridium_sensu_stricto_11	0	0	0	0	0	0	0	0	0	0	0	0	0	0	0	0	0	0	0	0	0	0	0	0	0	0	0	0	0	0	0	0	0	0	0	0	0	0	0	0	0	0	0	0	0	0	0	0	0
Dechlorobacter	0	0	0	0	0	0	0	0	0	0	0	0	0	0	0	0	0	0	0	0	0	0	0	0	0	0	0	0	0	0	0	0	0	0	0	0	0	0	0	0	0	0	0	0	0	0	0	0	0
Marmoricola	0	0	0	0	0	0	0	0	0	0	0	0	0	0	0	0	0	0	0	0	0	0	0	0	0	0	0	0	0	0	0	0	0	0	0	0	0	0	0	0	0	0	0	0	0	0	0	0	0
Succinispira	0	0	0	0	0	0	0	0	0	0	0	0	0	0	0	0	0	0	0	0	0	0	0	0	0	0	0	0	0	0	0	0	0	0	0	0	0	0	0	0	0	0	0	0	0	0	0	0	0
Camelimonas	0	0	0	0	0	0	0	0	0	0	0	0	0	0	0	0	0	0	0	0	0	0	0	0	0	0	0	0	0	0	0	0	0	0	0	0	0	0	0	0	0	0	0	0	0	0	0	0	0
Sulfurovum	0	0	0	0	0	0	0	0	0	0	0	0	0	0	0	0	0	0	0	0	0	0	0	0	0	0	0	0	0	0	0	0	0	0	0	0	0	0	0	0	0	0	0	0	0	0	0	0	0
Subgroup_10	0	0	0	0	0	0	0	0	0	0	0	0	0	0	0	0	0	0	0	0	0	0	0	0	0	0	0	0	0	0	0	0	0	0	0	0	0	0	0	0	0	0	0	0	0	0	0	0	0
CL500-29_marine_group	0	0	0	0	0	0	0	0	0	0	0	0	0	0	0	0	0	0	0	0	0	0	0	0	0	0	0	0	0	0	0	0	0	0	0	0	0	0	0	0	0	0	0	0	0	0	0	0	0
Marinobacterium	0	0	0	0	0	0	0	0	0	0	0	0	0	0	0	0	0	0	0	0	0	0	0	0	0	0	0	0	0	0	0	0	0	0	0	0	0	0	0	0	0	0	0	0	0	0	0	0	0
Caldalkalibacillus	0	0	0	0	0	0	0	0	0	0	0	0	0	0	0	0	0	0	0	0	0	0	0	0	0	0	0	0	0	0	0	0	0	0	0	0	0	0	0	0	0	0	0	0	0	0	0	0	0
CENA359	0	0	0	0	0	0	0	0	0	0	0	0	0	0	0	0	0	0	0	0	0	0	0	0	0	0	0	0	0	0	2.39654e-05	0	0	0	0	0	0	0	0	0	0	0	0	0	0	0	0	0	0
BD1-7_clade	0	0	0	0	0	0	0	0	0	0	0	0	0	0	0	0	0	0	0	0	0	0	0	0	0	0	0	0	0	0	0	0	0	0	0	0	0	0	0	0	0	0	0	0	0	0	0	0	0
Azotobacter	0	0	0	0	0	0	0	0	0	0	0	0	0	0	0	0	0	0	0	0	0	0	0	0	0	0	0	0	0	0	0	0	0	0	0	0	0	0	0	0	0	0	0	0	0	0	0	0	0
Bordetella	0	0	0	0	0	0	0	0	0	0	0	0	0	0	0	0	0	0	0	0	0	0	0	0	0	0	0	0	0	0	0	0	0	0	0	0	0	0	0	0	0	0	0	0	0	0	0	0	0
Spirosoma	0	0	0	0	0	0	0	0	0	0	0	0	0	0	0	0	0	0	0	0	0	0	0	0	0	0	0	0	0	0	0	0	0	0	0	0	0	0	0	0	0	0	0	0	0	0	0	0	0
Mageibacillus	0	0	0	0	0	0	0	0	0	0	0	0	0	0	0	0	0	0	0	0	0	0	0	0	0	0	0	0	0	0	0	0	0	0	0	0	0	0	0	0	0	0	0	0	0	0	0	0	0
Curvibacter	0	0	0	0	0	0	0	0	0	0	0	0	0	0	0	0	0	0	0	0	0	0	0	0	0	0	0	0	0	0	0	0	0	0	0	0	0	0	0	0	0	0	0	0	0	0	0	0	0
Brucella	0	0	0	0	0	0	0	0	0	0	0	0	0	0	0	0	0	0	0	0	0	0	0	0	0	0	0	0	0	0	0	0	0	0	0	0	0	0	0	0	0	0	0	0	0	0	0	0	0
Brachymonas	0	0	0	0	0	0	0	0	0	0	0	0	0	0	0	0	0	0	0	0	0	0	0	0	0	0	0	0	0	0	0	0	0	0	0	0	0	0	0	0	0	0	0	0	0	0	0	0	0
Sphaerotilus	0	0	0	0	0	0	0	0	0	0	0	0	0	0	0	0	0	0	0	0	0	0	0	0	0	0	0	0	0	0	0	0	0	0	0	0	0	0	0	0	0	0	0	0	0	0	0	0	0
Sporanaerobacter	0	0	0	0	0	0	0	0	0	0	0	0	0	0	0	0	0	0	0	0	0	0	0	0	0	0	0	0	0	0	0	0	0	0	0	0	0	0	0	0	0	0	0	0	0	0	0	0	0
Maribacter	0	0	0	0	0	0	0	0	0	0	0	0	0	0	0	0	0	0	0	0	0	0	0	0	0	0	0	0	0	0	0	0	0	0	0	0	0	0	0	0	0	0	0	0	0	0	0	0	0
Methyloversatilis	0	0	0	0	0	0	0	0	0	0	0	0	0	0	0	0	0	0	0	0	0	0	0	0	0	0	0	0	0	0	0	0	0	0	0	0	0	0	0	0	0	0	0	0	0	0	0	0	0
Acetobacter	0	0	0	0	0	0	0	0	0	0	0	0	0	0	0	0	0	0	0	0	0	0	0	0	0	0	0	0	0	0	0	0	0	0	0	0	0	0	0	0	0	0	0	0	0	0	0	0	0
Stenotrophobacter	0	0	0	0	0	0	0	0	0	0	0	0	0	0	0	0	0	0	0	0	0	0	0	0	0	0	0	0	0	0	0	0	0	0	0	0	0	0	0	0	0	0	0	0	0	0	0	0	0
Bryocella	0	0	0	0	0	0	0	0	0	0	0	0	0	0	0	0	0	0	0	0	0	0	0	0	0	0	0	0	0	0	0	0	0	0	0	0	0	0	0	0	0	0	0	0	0	0	0	0	0
Abditibacterium	0	0	0	0	0	0	0	0	0	0	0	0	0	0	0	0	0	0	0	0	0	0	0	0	0	0	0	0	0	0	0	0	0	0	0	0	0	0	0	0	0	0	0	0	0	0	0	0	0
Acetatifactor	0	0	0	0	0	0	0	0	0	0	0	0	0	0	0	0	0	0	0	0	0	0	0	0	0	0	0	0	0	0	0	0	0	0	0	0	0	0	0	0	0	0	0	0	0	0	0	0	0
mle1-7	0	0	0	0	0	0	0	0	0	0	0	0	0	0	0	0	0	0	0	0	0	0	0	0	0	0	0	0	0	0	0	0	0	0	0	0	0	0	0	0	0	0	0	0	0	0	0	0	0
Sporosarcina	0	0	0	0	0	0	0	0	0	0	0	0	0	0	0	0	0	0	0	0	0	0	0	0	0	0	0	0	0	0	0	0	0	0	0	0	0	0	0	0	0	0	0	0	0	0	0	0	0
Listeria	0	0	0	0	0	0	0	0	0	0	0	0	0	0	0	0	0	0	0	0	0	0	0	0	0	0	0	0	0	0	0	0	0	0	0	0	0	0	0	0	0	0	0	0	0	0	0	0	0
Cellulosimicrobium	0	0	0	0	0	0	0	0	0	0	0	0	0	0	0	0	0	0	0	0	0	0	0	0	0	0	0	0	0	0	0	0	0	0	0	0	0	0	0	0	0	0	0	0	0	0	0	0	0
Tsukamurella	0	0	0	0	0	0	0	0	0	0	0	0	0	0	0	0	0	0	0	0	0	0	0	0	0	0	0	0	0	0	0	0	0	0	0	0	0	0	0	0	0	0	0	0	0	0	0	0	0
Tundrisphaera	0	0	0	0	0	0	0	0	0	0	0	0	0	0	0	0	0	0	0	0	0	0	0	0	0	0	0	0	0	0	0	0	0	0	0	0	0	0	0	0	0	0	0	0	0	0	0	0	0
Cellulomonas	0	0	0	0	0	0	0	0	0	0	0	0	0	0	0	0	0	0	0	0	0	0	0	0	0	0	0	0	0	0	0	0	0	0	0	0	0	0	0	0	0	0	0	0	0	0	0	0	0
Actinotignum	0	0	0	0	0	0	0	0	0	0	0	0	0	0	0	0	0	0	0	0	0	0	0	0	0	0	0	0	0	0	0	0	0	0	0	0	0	0	0	0	0	0	0	0	0	0	0	0	0
Melittangium	0	0	0	0	0	0	0	0	0	0	0	0	0	0	0	0	0	0	0	0	0	0	0	0	0	0	0	0	0	0	0	0	0	0	0	0	0	0	0	0	0	0	0	0	0	0	0	0	0
Vitreoscilla	0	0	0	0	0	0	0	0	0	0	0	0	0	0	0	0	0	0	0	0	0	0	0	0	0	0	0	0	0	0	0	0	0	0	0	0	0	0	0	0	0	0	0	0	0	0	0	0	0
Cerasicoccus	0	0	0	0	0	0	0	0	0	0	0	0	0	0	0	0	0	0	0	0	0	0	0	0	0	0	0	0	0	0	0	0	0	0	0	0	0	0	0	0	0	0	0	0	0	0	0	0	0
Cellvibrio	0	0	0	0	0	0	0	0	0	0	0	0	0	0	0	0	0	0	0	0	0	0	0	0	0	0	0	0	0	0	0	0	0	0	0	0	0	0	0	0	0	0	0	0	0	0	0	0	0
Candidatus_Nitrosotenuis	0	0	0	0	0	0	0	0	0	0	0	0	0	0	0	0	0	0	0	0	0	0	0	0	0	0	0	0	0	0	0	0	0	0	0	0	0	0	0	0	0	0	0	0	0	0	0	0	0
Vitellibacter	0	0	0	0	0	0	0	0	0	0	0	0	0	0	0	0	0	0	0	0	0	0	0	0	0	0	0	0	0	0	0	0	0	0	0	0	0	0	0	0	0	0	0	0	0	0	0	0	0
Actinoplanes	0	0	0	0	0	0	0	0	0	0	0	0	0	0	0	0	0	0	0	0	0	0	0	0	0	0	0	0	0	0	0	0	0	0	0	0	0	0	0	0	0	0	0	0	0	0	0	0	0
Vampirovibrio	0	0	0	0	0	0	0	0	0	0	0	0	0	0	0	0	0	0	0	0	0	0	0	0	0	0	0	0	0	0	0	0	0	0	0	0	0	0	0	0	0	0	0	0	0	0	0	0	0
Candidatus_Phytoplasma	0	0	0	0	0	0	0	0	0	0	0	0	0	0	0	0	0	0	0	0	0	0	0	0	0	0	0	0	0	0	0	0	0	0	0	0	0	0	0	0	0	0	0	0	0	0	0	0	0
Undibacterium	0	0	0	0	0	0	0	0	0	0	0	0	0	0	0	0	0	0	0	0	0	0	0	0	0	0	0	0	0	0	0	0	0	0	0	0	0	0	0	0	0	0	0	0	0	0	0	0	0
Ureaplasma	0	0	0	0	0	0	0	0	0	0	0	0	0	0	0	0	0	0	0	0	0	0	0	0	0	0	0	0	0	0	0	0	0	0	0	0	0	0	0	0	0	0	0	0	0	0	0	0	0
Candidatus_Paracaedibacter	0	0	0	0	0	0	0	0	0	0	0	0	0	0	0	0	0	0	0	0	0	0	0	0	0	0	0	0	0	0	0	0	0	0	0	0	0	0	0	0	0	0	0	0	0	0	0	0	0
Macrococcus	0	0	0	0	0	0	0	0	0	0	0	0	0	0	0	0	0	0	0	0	0	0	0	0	0	0	0	0	0	0	0	0	0	0	0	0	0	0	0	0	0	0	0	0	0	0	0	0	0
Acidipila	0	0	0	0	0	0	0	0	0	0	0	0	0	0	0	0	0	0	0	0	0	0	0	0	0	0	0	0	0	0	0	0	0	0	0	0	0	0	0	0	0	0	0	0	0	0	0	0	0
MD3-55	0	0	0	0	0	0	0	0	0	0	0	0	0	0	0	0	0	0	0	0	0	0	0	0	0	0	0	0	0	0	0	0	0	0	0	0	0	0	0	0	0	0	0	0	0	0	0	0	0
Variovorax	0	0	0	0	0	0	0	0	0	0	0	0	0	0	0	0	0	0	0	0	0	0	0	0	0	0	0	0	0	0	0	0	0	0	0	0	0	0	0	0	0	0	0	0	0	0	0	0	0
Actibacter	0	0	0	0	0	0	0	0	0	0	0	0	0	0	0	0	0	0	0	0	0	0	0	0	0	0	0	0	0	0	0	0	0	0	0	0	0	0	0	0	0	0	0	0	0	0	0	0	0
Candidatus_Udaeobacter	0	0	0	0	0	0	0	0	0	0	0	0	0	0	0	0	0	0	0	0	0	0	0	0	0	0	0	0	0	0	0	0	0	0	0	0	0	0	0	0	0	0	0	0	0	0	0	0	0
Chalicogloea_CCALA_975	0	0	0	0	0	0	0	0	0	0	0	0	0	0	0	0	0	0	0	0	0	0	0	0	0	0	0	0	0	0	0	0	0	0	0	0	0	0	0	0	0	0	0	0	0	0	0	0	0
Tenacibaculum	0	0	0	0	0	0	0	0	0	0	0	0	0	0	0	0	0	0	0	0	0	0	0	0	0	0	0	0	0	0	0	0	0	0	0	0	0	0	0	0	0	0	0	0	0	0	0	0	0
Chlamydia	0	0	0	0	0	0	0	0	0	0	0	0	0	0	0	0	0	0	0	0	0	0	0	0	0	0	0	0	0	0	0	0	0	0	0	0	0	0	0	0	0	0	0	0	0	0	0	0	0
Chitinophaga	0	0	0	0	0	0	0	0	0	0	0	0	0	0	0	0	0	0	0	0	0	0	0	0	0	0	0	0	0	0	0	0	0	0	0	0	0	0	0	0	0	0	0	0	0	0	0	0	0
Tepidisphaera	0	0	0	0	0	0	0	0	0	0	0	0	0	0	0	0	0	0	0	0	0	0	0	0	0	0	0	0	0	0	0	0	0	0	0	0	0	0	0	0	0	0	0	0	0	0	0	0	0
Chitinimonas	0	0	0	0	0	0	0	0	0	0	0	0	0	0	0	0	0	0	0	0	0	0	0	0	0	0	0	0	0	0	0	0	0	0	0	0	0	0	0	0	0	0	0	0	0	0	0	0	0
YC-ZSS-LKJ147	0	0	0	0	0	0	0	0	0	0	0	0	0	0	0	0	0	0	0	0	0	0	0	0	0	0	0	0	0	0	0	0	0	0	0	0	0	0	0	0	0	0	0	0	0	0	0	0	0
Chthoniobacter	0	0	0	0	0	0	0	0	0	0	0	0	0	0	0	0	0	0	0	0	0	0	0	0	0	0	0	0	0	0	0	0	0	0	0	0	0	0	0	0	0	0	0	0	0	0	0	0	0
[Anaerorhabdus]_furcosa_group	0	0	0	0	0	0	0	0	0	0	0	0	0	0	0	0	0	0	0	0	0	0	0	0	0	0	0	0	0	0	0	0	0	0	0	0	0	0	0	0	0	0	0	0	0	0	0	0	0
[Agitococcus]_lubricus_group	0	0	0	0	0	0	0	0	0	0	0	0	0	0	0	0	0	0	0	0	0	0	0	0	0	0	0	0	0	0	0	0	0	0	0	0	0	0	0	0	0	0	0	0	0	0	0	0	0
Zoogloea	0	0	0	0	0	0	0	0	0	0	0	0	0	0	0	0	0	0	0	0	0	0	0	0	0	0	0	0	0	0	0	0	0	0	0	0	0	0	0	0	0	0	0	0	0	0	0	0	0
Chroococcidiopsis_PCC_7203	0	0	0	0	0	0	0	0	0	0	0	0	0	0	0	0	0	0	0	0	0	0	0	0	0	0	0	0	0	0	0	0	0	0	0	0	0	0	0	0	0	0	0	0	0	0	0	0	0
Luedemannella	0	0	0	0	0	0	0	0	0	0	0	0	0	0	0	0	0	0	0	0	0	0	0	0	0	0	0	0	0	0	0	0	0	0	0	0	0	0	0	0	0	0	0	0	0	0	0	0	0
Vulcaniibacterium	0	0	0	0	0	0	0	0	0	0	0	0	0	0	0	0	0	0	0	0	0	0	0	0	0	0	0	0	0	0	0	0	0	0	0	0	0	0	0	0	0	0	0	0	0	0	0	0	0
Candidatus_Berkiella	0	0	0	0	0	0	0	0	0	0	0	0	0	0	0	0	0	0	0	0	0	0	0	0	0	0	0	0	0	0	0	0	0	0	0	0	0	0	0	0	0	0	0	0	0	0	0	0	0
Luteitalea	0	0	0	0	0	0	0	0	0	0	0	0	0	0	0	0	0	0	0	0	0	0	0	0	0	0	0	0	0	0	0	0	0	0	0	0	0	0	0	0	0	0	0	0	0	0	0	0	0
Candidatus_Koribacter	0	0	0	0	0	0	0	0	0	0	0	0	0	0	0	0	0	0	0	0	0	0	0	0	0	0	0	0	0	0	0	0	0	0	0	0	0	0	0	0	0	0	0	0	0	0	0	0	0
Thermoactinomyces	0	0	0	0	0	0	0	0	0	0	0	0	0	0	0	0	0	0	0	0	0	0	0	0	0	0	0	0	0	0	0	0	0	0	0	0	0	0	0	0	0	0	0	0	0	0	0	0	0
Thauera	0	0	0	0	0	0	0	0	0	0	0	0	0	0	0	0	0	0	0	0	0	0	0	0	0	0	0	0	0	0	0	0	0	0	0	0	0	0	0	0	0	0	0	0	0	0	0	0	0
Adhaeribacter	0	0	0	0	0	0	0	0	0	0	0	0	0	0	0	0	0	0	0	0	0	0	0	0	0	0	0	0	0	0	2.99568e-05	0	0	0	0	0	0	0	0	0	0	0	0	0	0	0	0	0	0
Terrimonas	0	0	0	0	0	0	0	0	0	0	0	0	0	0	0	0	0	0	0	0	0	0	0	0	0	0	0	0	0	0	0	0	0	0	0	0	0	0	0	0	0	0	0	0	0	0	0	0	0
Candidatus_Alysiosphaera	0	0	0	0	0	0	0	0	0	0	0	0	0	0	0	0	0	0	0	0	0	0	0	0	0	0	0	0	0	0	0	0	0	0	0	0	0	0	0	0	0	0	0	0	0	0	0	0	0
Candidatus_Aquirestis	0	0	0	0	0	0	0	0	0	0	0	0	0	0	0	0	0	0	0	0	0	0	0	0	0	0	0	0	0	0	0	0	0	0	0	0	0	0	0	0	0	0	0	0	0	0	0	0	0
Candidatus_Aquiluna	0	0	0	0	0	0	0	0	0	0	0	0	0	0	0	0	0	0	0	0	0	0	0	0	0	0	0	0	0	0	0	0	0	0	0	0	0	0	0	0	0	0	0	0	0	0	0	0	0
Skermanella	0	0	0	0	0	0	0	0	0	0	0	0	0	0	0	0	0	0	0	0	0	0	0	0	0	0	0	0	0	0	0	0	0	0	0	0	0	0	0	0	0	0	0	0	0	0	0	0	0
Peptoanaerobacter	0	0	0	0	0	0	0	0	0	0	0	0	0	0	0	0	0	0	0	0	0	0	0	0	0	0	0	0	0	0	0	0	0	0	0	0	0	0	0	0	0	0	0	0	0	0	0	0	0
Pedomicrobium	0	0	0	0	0	0	0	0	0	0	0	0	0	0	0	0	0	0	0	0	0	0	0	0	0	0	0	0	0	0	0	0	0	0	0	0	0	0	0	0	0	0	0	0	0	0	0	0	0
Gluconobacter	0	0	0	0	0	0	0	0	0	0	0	0	0	0	0	0	0	0	0	0	0	0	0	0	0	0	0	0	0	0	0	0	0	0	0	0	0	0	0	0	0	0	0	0	0	0	0	0	0
Phaeodactylibacter	0	0	0	0	0	0	0	0	0	0	0	0	0	0	0	0	0	0	0	0	0	0	0	0	0	0	0	0	0	0	0	0	0	0	0	0	0	0	0	0	0	0	0	0	0	0	0	0	0
Gelidibacter	0	0	0	0	0	0	0	0	0	0	0	0	0	0	0	0	0	0	0	0	0	0	0	0	0	0	0	0	0	0	0	0	0	0	0	0	0	0	0	0	0	0	0	0	0	0	0	0	0
Geodermatophilus	0	0	0	0	0	0	0	0	0	0	0	0	0	0	0	0	0	0	0	0	0	0	0	0	0	0	0	0	0	0	0	0	0	0	0	0	0	0	0	0	0	0	0	0	0	0	0	0	0
Patulibacter	0	0	0	0	0	0	0	0	0	0	0	0	0	0	0	0	0	0	0	0	0	0	0	0	0	0	0	0	0	0	0	0	0	0	0	0	0	0	0	0	0	0	0	0	0	0	0	0	0
Parascardovia	0	0	0	0	0	0	0	0	0	0	0	0	0	0	0	0	0	0	0	0	0	0	0	0	0	0	0	0	0	0	4.79309e-05	0	0	0	0	0	0	0	0	0	0	0	0	0	0	0	0	0	0
Angelakisella	0	0	0	0	0	0	0	0	0	0	0	0	0	0	0	0	0	0	0	0	0	0	0	0	0	0	0	0	0	0	0	0	0	0	0	0	0	0	0	0	0	0	0	0	0	0	0	0	0
Nibribacter	0	0	0	0	0	0	0	0	0	0	0	0	0	0	0	0	0	0	0	0	0	0	0	0	0	0	0	0	0	0	0	0	0	0	0	0	0	0	0	0	0	0	0	0	0	0	0	0	0
Granulicella	0	0	0	0	0	0	0	0	0	0	0	0	0	0	0	0	0	0	0	0	0	0	0	0	0	0	0	0	0	0	0	0	0	0	0	0	0	0	0	0	0	0	0	0	0	0	0	0	0
Parvibaculum	0	0	0	0	0	0	0	0	0	0	0	0	0	0	0	0	0	0	0	0	0	0	0	0	0	0	0	0	0	0	0	0	0	0	0	0	0	0	0	0	0	0	0	0	0	0	0	0	0
HN-HF0106	0	0	0	0	0	0	0	0	0	0	0	0	0	0	0	0	0	0	0	0	0	0	0	0	0	0	0	0	0	0	0	0	0	0	0	0	0	0	0	0	0	0	0	0	0	0	0	0	0
Agromyces	0	0	0	0	0	0	0	0	0	0	0	0	0	0	0	0	0	0	0	0	0	0	0	0	0	0	0	0	0	0	0	0	0	0	0	0	0	0	0	0	0	0	0	0	0	0	0	0	0
Polaromonas	0	0	0	0	0	0	0	0	0	0	0	0	0	0	0	0	0	0	0	0	0	0	0	0	0	0	0	0	0	0	0	0	0	0	0	0	0	0	0	0	0	0	0	0	0	0	0	0	0
Pleurocapsa_PCC-7319	0	0	0	0	0	0	0	0	0	0	0	0	0	0	0	0	0	0	0	0	0	0	0	0	0	0	0	0	0	0	0	0	0	0	0	0	0	0	0	0	0	0	0	0	0	0	0	0	0
Pleomorphomonas	0	0	0	0	0	0	0	0	0	0	0	0	0	0	0	0	0	0	0	0	0	0	0	0	0	0	0	0	0	0	0	0	0	0	0	0	0	0	0	0	0	0	0	0	0	0	0	0	0
Aquamicrobium	0	0	0	0	0	0	0	0	0	0	0	0	0	0	0	0	0	0	0	0	0	0	0	0	0	0	0	0	0	0	0	0	0	0	0	0	0	0	0	0	0	0	0	0	0	0	0	0	0
Portibacter	0	0	0	0	0	0	0	0	0	0	0	0	0	0	0	0	0	0	0	0	0	0	0	0	0	0	0	0	0	0	0	0	0	0	0	0	0	0	0	0	0	0	0	0	0	0	0	0	0
Nakamurella	0	0	0	0	0	0	0	0	0	0	0	0	0	0	0	0	0	0	0	0	0	0	0	0	0	0	0	0	0	0	0	0	0	0	0	0	0	0	0	0	0	0	0	0	0	0	0	0	0
Floricoccus	0	0	0	0	0	0	0	0	0	0	0	0	0	0	0	0	0	0	0	0	0	0	0	0	0	0	0	0	0	0	0	0	0	0	0	0	0	0	0	0	0	0	0	0	0	0	0	0	0
Fructobacillus	0	0	0	0	0	0	0	0	0	0	0	0	0	0	0	0	0	0	0	0	0	0	0	0	0	0	0	0	0	0	0	0	0	0	0	0	0	0	0	0	0	0	0	0	0	0	0	0	0
Antricoccus	0	0	0	0	0	0	0	0	0	0	0	0	0	0	0	0	0	0	0	0	0	0	0	0	0	0	0	0	0	0	0	0	0	0	0	0	0	0	0	0	0	0	0	0	0	0	0	0	0
Phaselicystis	0	0	0	0	0	0	0	0	0	0	0	0	0	0	0	0	0	0	0	0	0	0	0	0	0	0	0	0	0	0	0	0	0	0	0	0	0	0	0	0	0	0	0	0	0	0	0	0	0
Phyllobacterium	0	0	0	0	0	0	0	0	0	0	0	0	0	0	0	0	0	0	0	0	0	0	0	0	0	0	0	0	0	0	0	0	0	0	0	0	0	0	0	0	0	0	0	0	0	0	0	0	0
Kurthia	0	0	0	0	0	0	0	0	0	0	0	0	0	0	0	0	0	0	0	0	0	0	0	0	0	0	0	0	0	0	0	0	0	0	0	0	0	0	0	0	0	0	0	0	0	0	0	0	0
Photobacterium	0	0	0	0	0	0	0	0	0	0	0	0	0	0	0	0	0	0	0	0	0	0	0	0	0	0	0	0	0	0	0	0	0	0	0	0	0	0	0	0	0	0	0	0	0	0	0	0	0
Parapedobacter	0	0	0	0	0	0	0	0	0	0	0	0	0	0	0	0	0	0	0	0	0	0	0	0	0	0	0	0	0	0	0	0	0	0	0	0	0	0	0	0	0	0	0	0	0	0	0	0	0
Opitutus	0	0	0	0	0	0	0	0	0	0	0	0	0	0	0	0	0	0	0	0	0	0	0	0	0	0	0	0	0	0	0	0	0	0	0	0	0	0	0	0	0	0	0	0	0	0	0	0	0
Oligoflexus	0	0	0	0	0	0	0	0	0	0	0	0	0	0	0	0	0	0	0	0	0	0	0	0	0	0	0	0	0	0	0	0	0	0	0	0	0	0	0	0	0	0	0	0	0	0	0	0	0
Alishewanella	0	0	0	0	0	0	0	0	0	0	0	0	0	0	0	0	0	0	0	0	0	0	0	0	0	0	0	0	0	0	0	0	0	0	0	0	0	0	0	0	0	0	0	0	0	0	0	0	0
Ornithobacterium	0	0	0	0	0	0	0	0	0	0	0	0	0	0	0	0	0	0	0	0	0	0	0	0	0	0	0	0	0	0	0	0	0	0	0	0	0	0	0	0	0	0	0	0	0	0	0	0	0
Ornithinimicrobium	0	0	0	0	0	0	0	0	0	0	0	0	0	0	0	0	0	0	0	0	0	0	0	0	0	0	0	0	0	0	0	0	0	0	0	0	0	0	0	0	0	0	0	0	0	0	0	0	0
JGI_0001001-H03	0	0	0	0	0	0	0	0	0	0	0	0	0	0	0	0	0	0	0	0	0	0	0	0	0	0	0	0	0	0	0	0	0	0	0	0	0	0	0	0	0	0	0	0	0	0	0	0	0
Jonquetella	0	0	0	0	0	0	0	0	0	0	0	0	0	0	0	0	0	0	0	0	0	0	0	0	0	0	0	0	0	0	0	0	0	0	0	0	0	0	0	0	0	0	0	0	0	0	0	0	0
Jatrophihabitans	0	0	0	0	0	0	0	0	0	0	0	0	0	0	0	0	0	0	0	0	0	0	0	0	0	0	0	0	0	0	0	0	0	0	0	0	0	0	0	0	0	0	0	0	0	0	0	0	0
Jeotgalicoccus	0	0	0	0	0	0	0	0	0	0	0	0	0	0	0	0	0	0	0	0	0	0	0	0	0	0	0	0	0	0	0	0	0	0	0	0	0	0	0	0	0	0	0	0	0	0	0	0	0
Nodosilinea_PCC-7104	0	0	0	0	0	0	0	0	0	0	0	0	0	0	0	0	0	0	0	0	0	0	0	0	0	0	0	0	0	0	0	0	0	0	0	0	0	0	0	0	0	0	0	0	0	0	0	0	0
Occallatibacter	0	0	0	0	0	0	0	0	0	0	0	0	0	0	0	0	0	0	0	0	0	0	0	0	0	0	0	0	0	0	0	0	0	0	0	0	0	0	0	0	0	0	0	0	0	0	0	0	0
Oblitimonas	0	0	0	0	0	0	0	0	0	0	0	0	0	0	0	0	0	0	0	0	0	0	0	0	0	0	0	0	0	0	0	0	0	0	0	0	0	0	0	0	0	0	0	0	0	0	0	0	0
OM60(NOR5)_clade	0	0	0	0	0	0	0	0	0	0	0	0	0	0	0	0	0	0	0	0	0	0	0	0	0	0	0	0	0	0	0	0	0	0	0	0	0	0	0	0	0	0	0	0	0	0	0	0	0
Inhella	0	0	0	0	0	0	0	0	0	0	0	0	0	0	0	0	0	0	0	0	0	0	0	0	0	0	0	0	0	0	0	0	0	0	0	0	0	0	0	0	0	0	0	0	0	0	0	0	0
Hydrotalea	0	0	0	0	0	0	0	0	0	0	0	0	0	0	0	0	0	0	0	0	0	0	0	0	0	0	0	0	0	0	0	0	0	0	0	0	0	0	0	0	0	0	0	0	0	0	0	0	0
Panacagrimonas	0	0	0	0	0	0	0	0	0	0	0	0	0	0	0	0	0	0	0	0	0	0	0	0	0	0	0	0	0	0	0	0	0	0	0	0	0	0	0	0	0	0	0	0	0	0	0	0	0
Paludisphaera	0	0	0	0	0	0	0	0	0	0	0	0	0	0	0	0	0	0	0	0	0	0	0	0	0	0	0	0	0	0	0	0	0	0	0	0	0	0	0	0	0	0	0	0	0	0	0	0	0
Parafilimonas	0	0	0	0	0	0	0	0	0	0	0	0	0	0	0	0	0	0	0	0	0	0	0	0	0	0	0	0	0	0	0	0	0	0	0	0	0	0	0	0	0	0	0	0	0	0	0	0	0
Hirschia	0	0	0	0	0	0	0	0	0	0	0	0	0	0	0	0	0	0	0	0	0	0	0	0	0	0	0	0	0	0	0	0	0	0	0	0	0	0	0	0	0	0	0	0	0	0	0	0	0
Anaerovorax	0	0	0	0	0	0	0	0	0	0	0	0	0	0	0	0	0	0	0	0	0	0	0	0	0	0	0	0	0	0	0	0	0	0	0	0	0	0	0	0	0	0	0	0	0	0	0	0	0
IS-44	0	0	0	0	0	0	0	0	0	0	0	0	0	0	0	0	0	0	0	0	0	0	0	0	0	0	0	0	0	0	0	0	0	0	0	0	0	0	0	0	0	0	0	0	0	0	0	0	0
Ignatzschineria	0	0	0	0	0	0	0	0	0	0	0	0	0	0	0	0	0	0	0	0	0	0	0	0	0	0	0	0	0	0	0	0	0	0	0	0	0	0	0	0	0	0	0	0	0	0	0	0	0
Ignavigranum	0	0	0	0	0	0	0	0	0	0	0	0	0	0	0	0	0	0	0	0	0	0	0	0	0	0	0	0	0	0	0	0	0	0	0	0	0	0	0	0	0	0	0	0	0	0	0	0	0
Ottowia	0	0	0	0	0	0	0	0	0	0	0	0	0	0	0	0	0	0	0	0	0	0	0	0	0	0	0	0	0	0	0	0	0	0	0	0	0	0	0	0	0	0	0	0	0	0	0	0	0
Paludibacter	0	0	0	0	0	0	0	0	0	0	0	0	0	0	0	0	0	0	0	0	0	0	0	0	0	0	0	0	0	0	0	0	0	0	0	0	0	0	0	0	0	0	0	0	0	0	0	0	0
Nocardia	0	0	0	0	0	0	0	0	0	0	0	0	0	0	0	0	0	0	0	0	0	0	0	0	0	0	0	0	0	0	0	0	0	0	0	0	0	0	0	0	0	0	0	0	0	0	0	0	0
Paeniglutamicibacter	0	0	0	0	0	0	0	0	0	0	0	0	0	0	0	0	0	0	0	0	0	0	0	0	0	0	0	0	0	0	0	0	0	0	0	0	0	0	0	0	0	0	0	0	0	0	0	0	0
Agrococcus	0	0	0	0	0	0	0	0	0	0	0	0	0	0	0	0	0	0	0	0	0	0	0	0	0	0	0	0	0	0	0	0	0	0	0	0	0	0	0	0	0	0	0	0	0	0	0	0	0
Duganella	0	0	0	0	0	0	0	0	0	0	0	0	0	0	0	0	0	0	0	0	0	0	0	0	0	0	0	0	0	0	0	0	0	0	0	0	0	0	0	0	0	0	0	0	0	0	0	0	0
Lentimicrobium	0	0	0	0	0	0	0	0	0	0	0	0	0	0	0	0	0	0	0	0	0	0	0	0	0	0	0	0	0	0	0	0	0	0	0	0	0	0	0	0	0	0	0	0	0	0	0	0	0
Roseisolibacter	0	0	0	0	0	0	0	0	0	0	0	0	0	0	0	0	0	0	0	0	0	0	0	0	0	0	0	0	0	0	0	0	0	0	0	0	0	0	0	0	0	0	0	0	0	0	0	0	0
Rummeliibacillus	0	0	0	0	0	0	0	0	0	0	0	0	0	0	0	0	0	0	0	0	0	0	0	0	0	0	0	0	0	0	0	0	0	0	0	0	0	0	0	0	0	0	0	0	0	0	0	0	0
Mizugakiibacter	0	0	0	0	0	0	0	0	0	0	0	0	0	0	0	0	0	0	0	0	0	0	0	0	0	0	0	0	0	0	0	0	0	0	0	0	0	0	0	0	0	0	0	0	0	0	0	0	0
Leptolyngbya_ANT.L52.2	0	0	0	0	0	0	0	0	0	0	0	0	0	0	0	0	0	0	0	0	0	0	0	0	0	0	0	0	0	0	0	0	0	0	0	0	0	0	0	0	0	0	0	0	0	0	0	0	0
Edaphobacter	0	0	0	0	0	0	0	0	0	0	0	0	0	0	0	0	0	0	0	0	0	0	0	0	0	0	0	0	0	0	0	0	0	0	0	0	0	0	0	0	0	0	0	0	0	0	0	0	0
Elizabethkingia	0	0	0	0	0	0	0	0	0	0	0	0	0	0	0	0	0	0	0	0	0	0	0	0	0	0	0	0	0	0	0	0	0	0	0	0	0	0	0	0	0	0	0	0	0	0	0	0	0
Ellin517	0	0	0	0	0	0	0	0	0	0	0	0	0	0	0	0	0	0	0	0	0	0	0	0	0	0	0	0	0	0	0	0	0	0	0	0	0	0	0	0	0	0	0	0	0	0	0	0	0
Rhodanobacter	0	0	0	0	0	0	0	0	0	0	0	0	0	0	0	0	0	0	0	0	0	0	0	0	0	0	0	0	0	0	0	0	0	0	0	0	0	0	0	0	0	0	0	0	0	0	0	0	0
Leminorella	0	0	0	0	0	0	0	0	0	0	0	0	0	0	0	0	0	0	0	0	0	0	0	0	0	0	0	0	0	0	0	0	0	0	0	0	0	0	0	0	0	0	0	0	0	0	0	0	0
Leifsonia	0	0	0	0	0	0	0	0	0	0	0	0	0	0	0	0	0	0	0	0	0	0	0	0	0	0	0	0	0	0	0	0	0	0	0	0	0	0	0	0	0	0	0	0	0	0	0	0	0
Asticcacaulis	0	0	0	0	0	0	0	0	0	0	0	0	0	0	0	0	0	0	0	0	0	0	0	0	0	0	0	0	0	0	0	0	0	0	0	0	0	0	0	0	0	0	0	0	0	0	0	0	0
Dinghuibacter	0	0	0	0	0	0	0	0	0	0	0	0	0	0	0	0	0	0	0	0	0	0	0	0	0	0	0	0	0	0	0	0	0	0	0	0	0	0	0	0	0	0	0	0	0	0	0	0	0
Dermatophilus	0	0	0	0	0	0	0	0	0	0	0	0	0	0	0	0	0	0	0	0	0	0	0	0	0	0	0	0	0	0	0	0	0	0	0	0	0	0	0	0	0	0	0	0	0	0	0	0	0
Sediminibacterium	0	0	0	0	0	0	0	0	0	0	0	0	0	0	0	0	0	0	0	0	0	0	0	0	0	0	0	0	0	0	0	0	0	0	0	0	0	0	0	0	0	0	0	0	0	0	0	0	0
Scytonema_PCC-7110	0	0	0	0	0	0	0	0	0	0	0	0	0	0	0	0	0	0	0	0	0	0	0	0	0	0	0	0	0	0	0	0	0	0	0	0	0	0	0	0	0	0	0	0	0	0	0	0	0
Denitratisoma	0	0	0	0	0	0	0	0	0	0	0	0	0	0	0	0	0	0	0	0	0	0	0	0	0	0	0	0	0	0	0	0	0	0	0	0	0	0	0	0	0	0	0	0	0	0	0	0	0
Lewinella	0	0	0	0	0	0	0	0	0	0	0	0	0	0	0	0	0	0	0	0	0	0	0	0	0	0	0	0	0	0	0	0	0	0	0	0	0	0	0	0	0	0	0	0	0	0	0	0	0
Serinicoccus	0	0	0	0	0	0	0	0	0	0	0	0	0	0	0	0	0	0	0	0	0	0	0	0	0	0	0	0	0	0	0	0	0	0	0	0	0	0	0	0	0	0	0	0	0	0	0	0	0
Schlegelella	0	0	0	0	0	0	0	0	0	0	0	0	0	0	0	0	0	0	0	0	0	0	0	0	0	0	0	0	0	0	0	0	0	0	0	0	0	0	0	0	0	0	0	0	0	0	0	0	0
Salana	0	0	0	0	0	0	0	0	0	0	0	0	0	0	0	0	0	0	0	0	0	0	0	0	0	0	0	0	0	0	0	0	0	0	0	0	0	0	0	0	0	0	0	0	0	0	0	0	0
Leptolyngbya_Es-Yyy1000	0	0	0	0	0	0	0	0	0	0	0	0	0	0	0	0	0	0	0	0	0	0	0	0	0	0	0	0	0	0	0	0	0	0	0	0	0	0	0	0	0	0	0	0	0	0	0	0	0
SH3-11	0	0	0	0	0	0	0	0	0	0	0	0	0	0	0	0	0	0	0	0	0	0	0	0	0	0	0	0	0	0	0	0	0	0	0	0	0	0	0	0	0	0	0	0	0	0	0	0	0
Desulfobulbus	0	0	0	0	0	0	0	0	0	0	0	0	0	0	0	0	0	0	0	0	0	0	0	0	0	0	0	0	0	0	0	0	0	0	0	0	0	0	0	0	0	0	0	0	0	0	0	0	0
Microvirga	0	0	0	0	0	0	0	0	0	0	0	0	0	0	0	0	0	0	0	0	0	0	0	0	0	0	0	0	0	0	0	0	0	0	0	0	0	0	0	0	0	0	0	0	0	0	0	0	0
Sanguibacter	0	0	0	0	0	0	0	0	0	0	0	0	0	0	0	0	0	0	0	0	0	0	0	0	0	0	0	0	0	0	0	0	0	0	0	0	0	0	0	0	0	0	0	0	0	0	0	0	0
Larkinella	0	0	0	0	0	0	0	0	0	0	0	0	0	0	0	0	0	0	0	0	0	0	0	0	0	0	0	0	0	0	0	0	0	0	0	0	0	0	0	0	0	0	0	0	0	0	0	0	0
F0058	0	0	0	0	0	0	0	0	0	0	0	0	0	0	0	0	0	0	0	0	0	0	0	0	0	0	0	0	0	0	0	0	0	0	0	0	0	0	0	0	0	0	0	0	0	0	0	0	0
Proteiniclasticum	0	0	0	0	0	0	0	0	0	0	0	0	0	0	0	0	0	0	0	0	0	0	0	0	0	0	0	0	0	0	0	0	0	0	0	0	0	0	0	0	0	0	0	0	0	0	0	0	0
Prosthecobacter	0	0	0	0	0	0	0	0	0	0	0	0	0	0	0	0	0	0	0	0	0	0	0	0	0	0	0	0	0	0	0	0	0	0	0	0	0	0	0	0	0	0	0	0	0	0	0	0	0
Pseudohongiella	0	0	0	0	0	0	0	0	0	0	0	0	0	0	0	0	0	0	0	0	0	0	0	0	0	0	0	0	0	0	0	0	0	0	0	0	0	0	0	0	0	0	0	0	0	0	0	0	0
Pseudoglutamicibacter	0	0	0	0	0	0	0	0	0	0	0	0	0	0	0	0	0	0	0	0	0	0	0	0	0	0	0	0	0	0	0	0	0	0	0	0	0	0	0	0	0	0	0	0	0	0	0	0	0
Ethanoligenens	0	0	0	0	0	0	0	0	0	0	0	0	0	0	0	0	0	0	0	0	0	0	0	0	0	0	0	0	0	0	0	0	0	0	0	0	0	0	0	0	0	0	0	0	0	0	0	0	0
Propioniciclava	0	0	0	0	0	0	0	0	0	0	0	0	0	0	0	0	0	0	0	0	0	0	0	0	0	0	0	0	0	0	0	0	0	0	0	0	0	0	0	0	0	0	0	0	0	0	0	0	0
Ferruginibacter	0	0	0	0	0	0	0	0	0	0	0	0	0	0	0	0	0	0	0	0	0	0	0	0	0	0	0	0	0	0	0	0	0	0	0	0	0	0	0	0	0	0	0	0	0	0	0	0	0
Fervidobacterium	0	0	0	0	0	0	0	0	0	0	0	0	0	0	0	0	0	0	0	0	0	0	0	0	0	0	0	0	0	0	0	0	0	0	0	0	0	0	0	0	0	0	0	0	0	0	0	0	0
Labrenzia	0	0	0	0	0	0	0	0	0	0	0	0	0	0	0	0	0	0	0	0	0	0	0	0	0	0	0	0	0	0	0	0	0	0	0	0	0	0	0	0	0	0	0	0	0	0	0	0	0
Aquaspirillum	0	0	0	0	0	0	0	0	0	0	0	0	0	0	0	0	0	0	0	0	0	0	0	0	0	0	0	0	0	0	0	0	0	0	0	0	0	0	0	0	0	0	0	0	0	0	0	0	0
Promicromonospora	0	0	0	0	0	0	0	0	0	0	0	0	0	0	0	0	0	0	0	0	0	0	0	0	0	0	0	0	0	0	0	0	0	0	0	0	0	0	0	0	0	0	0	0	0	0	0	0	0
Prevotellaceae_UCG-004	0	0	0	0	0	0	0	0	0	0	0	0	0	0	0	0	0	0	0	0	0	0	0	0	0	0	0	0	0	0	0	0	0	0	0	0	0	0	0	0	0	0	0	0	0	0	0	0	0
Pseudokineococcus	0	0	0	0	0	0	0	0	0	0	0	0	0	0	0	0	0	0	0	0	0	0	0	0	0	0	0	0	0	0	0	0	0	0	0	0	0	0	0	0	0	0	0	0	0	0	0	0	0
RB41	0	0	0	0	0	0	0	0	0	0	0	0	0	0	0	0	0	0	0	0	0	0	0	0	0	0	0	0	0	0	0	0	0	0	0	0	0	0	0	0	0	0	0	0	0	0	0	0	0
Enteractinococcus	0	0	0	0	0	0	0	0	0	0	0	0	0	0	0	0	0	0	0	0	0	0	0	0	0	0	0	0	0	0	0	0	0	0	0	0	0	0	0	0	0	0	0	0	0	0	0	0	0
Mucilaginibacter	0	0	0	0	0	0	0	0	0	0	0	0	0	0	0	0	0	0	0	0	0	0	0	0	0	0	0	0	0	0	0	0	0	0	0	0	0	0	0	0	0	0	0	0	0	0	0	0	0
Endomicrobium	0	0	0	0	0	0	0	0	0	0	0	0	0	0	0	0	0	0	0	0	0	0	0	0	0	0	0	0	0	0	0	0	0	0	0	0	0	0	0	0	0	0	0	0	0	0	0	0	0
Aestuariivivens	0	0	0	0	0	0	0	0	0	0	0	0	0	0	0	0	0	0	0	0	0	0	0	0	0	0	0	0	0	0	0	0	0	0	0	0	0	0	0	0	0	0	0	0	0	0	0	0	0
Raineyella	0	0	0	0	0	0	0	0	0	0	0	0	0	0	0	0	0	0	0	0	0	0	0	0	0	0	0	0	0	0	0	0	0	0	0	0	0	0	0	0	0	0	0	0	0	0	0	0	0
Lacunisphaera	0	0	0	0	0	0	0	0	0	0	0	0	0	0	0	0	0	0	0	0	0	0	0	0	0	0	0	0	0	0	0	0	0	0	0	0	0	0	0	0	0	0	0	0	0	0	0	0	0
Eremococcus	0	0	0	0	0	0	0	0	0	0	0	0	0	0	0	0	0	0	0	0	0	0	0	0	0	0	0	0	0	0	0	0	0	0	0	0	0	0	0	0	0	0	0	0	0	0	0	0	0
Erysipelotrichaceae_UCG-009	0	0	0	0	0	0	0	0	0	0	0	0	0	0	0	0	0	0	0	0	0	0	0	0	0	0	0	0	0	0	0	0	0	0	0	0	0	0	0	0	0	0	0	0	0	0	0	0	0
Pseudolabrys	0	0	0	0	0	0	0	0	0	0	0	0	0	0	0	0	0	0	0	0	0	0	0	0	0	0	0	0	0	0	0	0	0	0	0	0	0	0	0	0	0	0	0	0	0	0	0	0	0
Enteroscipio	0	0	0	0	0	0	0	0	0	0	0	0	0	0	0	0	0	0	0	0	0	0	0	0	0	0	0	0	0	0	0	0	0	0	0	0	0	0	0	0	0	0	0	0	0	0	0	0	0
Pseudorhizobium	0	0	0	0	0	0	0	0	0	0	0	0	0	0	0	0	0	0	0	0	0	0	0	0	0	0	0	0	0	0	0	0	0	0	0	0	0	0	0	0	0	0	0	0	0	0	0	0	0
Muribaculum	0	0	0	0	0	0	0	0	0	0	0	0	0	0	0	0	0	0	0	0	0	0	0	0	0	0	0	0	0	0	0	0	0	0	0	0	0	0	0	0	0	0	0	0	0	0	0	0	0
[truncated: 3,013 more columns]
